# Supplementary material for: Single-cell transcriptome and metagenome profiling reveals the genetic basis of rumen functions and convergent developmental patterns in ruminants
Source: HighWire-hosted journal article supplement (doi:10.1101/gr.278239.123), 2023-10-01
Supplement: Supplemental_Tables.xlsx [file Supplemental_Tables.xlsx]

## Sheet: Table S1
Table S1. Sample information and preparation process and conditions of single cell suspension for rumen tissue in sheep and goats during development stages.
Species	Timepoints	Stages	Step 1	Step 2	Step 3	Step 4	Step 5	Step 6	Step 7	Step 8	Step 9
			0.25% Trypsin (37℃)	Centrifugation (300 rpm/min)	2 mg/mL Collagenase I and II (37℃)	Nylon cell strainer (μm)	Centrifugation (200 rpm/min, retain the supernatant)	Centrifugation (300 rpm/min, retain the precipitates)	Red blood cell lysis	Dead cell removal	Percentage of activity	Rate of clumping
Sheep	e45	Early embryonic	10	5 min	20	70	3 min	5 min	N	N	0.987	0.068
	e60		10	5 min	20	70	3 min	5 min	N	N	0.952	0.028
	e75	Middle embryonic	10	5 min	45	70	3 min	5 min	N	N	0.973	0.0908
	e90		10	5 min	60	70	3 min	5 min	N	N	0.9314	0.0926
	e105		10	5 min	60	70	3 min	5 min	N	N	0.98	0.09
	e120	Late embryonic	10	5 min	55	70	3 min	5 min	N	N	0.9843	0.1018
	e135		10	5 min	30	70	3 min	5 min	N	N	0.9362	0.1497
	d0	Pre-rumination digestion	30	5 min	60	70	3 min	5 min	N	N	0.855	0.1868
	d7		30	5 min	60	70	3 min	5 min	N	Y	0.8959	0.1762
	d14		30	5 min	60	70	3 min	5 min	N	N	0.7799	0.1435
	d21	Transition digestion	30	5 min	60	70	3 min	5 min	N	N	0.8129	0.197
	d28		30	5 min	60	70	3 min	5 min	N	Y	0.8776	0.1491
	d35		30	5 min	60	70	3 min	5 min	N	N	0.8391	0.2436
	d42		30	5 min	60	70	3 min	5 min	N	N	0.7843	0.1434
	d49		30	5 min	60	70	3 min	5 min	N	N	0.8573	0.0778
	d56	Rumination digestion	30	5 min	60	70	3 min	5 min	N	N	0.8419	0.1973
	d90		30	5 min	60	70	3 min	5 min	N	Y	0.8859	0.0386
Goats	e45	Early embryonic	10	5 min	40	70	3 min	5 min	N	N	0.9206	0.0314
	e60		10	5 min	70	70	3 min	5 min	Y	Y	0.9282	0.0699
	e75	Middle embryonic	10	5 min	60	70	3 min	5 min	Y	N	0.935	0.097
	e90		10	5 min	40	70	3 min	5 min	Y	Y	0.9051	0.1528
	e105		10	5 min	60	70	3 min	5 min	Y	Y	0.9767	0.0845
	e120	Late embryonic	10	5 min	60	70	3 min	5 min	N	Y	0.9405	0.1404
	e135		10	5 min	60	70	3 min	5 min	Y	Y	0.9269	0.1648
	d0	Pre-rumination digestion	10	5 min	55	70	3 min	5 min	Y	Y	0.9601	0.1129
	d7		10	5 min	60	70	3 min	5 min	Y	Y	0.8789	0.1833
	d14		10	5 min	60	70	3 min	5 min	Y	Y	0.9115	0.143
	d21	Transition digestion	15	5 min	60	70	3 min	5 min	Y	Y	0.9376	0.071
	d28		15	5 min	70	70	3 min	5 min	Y	Y	0.8327	0.1956
	d35		15	5 min	90	70	3 min	5 min	Y	Y	0.8824	0.1199
	d42		15	5 min	105	70	3 min	5 min	Y	Y	0.8022	0.1918
	d49		15	5 min	60	70	3 min	5 min	Y	N	0.8046	0.1167
	d56	Rumination digestion	15	5 min	90	70	3 min	5 min	N	N	0.8419	0.1973
	d90		10	5 min	110	70	3 min	5 min	Y	Y	0.9303	0.2088

## Sheet: Table S2
Table S2. Summary information of single cell RNA-seq data quality control in sheep and goats rumen tissues.
Species	Timepoints	Q30 Bases in barcode	Q30 bases in RNA read	Q30 bases in UMI	Cells	Reads mapped confidently to genome	Number of reads	Mean reads per cell	Median genes per cell	Sequencing saturation	Doublets
Sheep	e45	0.969	0.929	0.966	11015	0.854	507304943	46055	1575	0.575	808
	e60	0.959	0.916	0.951	12534	0.857	494136924	39423	1355	0.579	951
	e75	0.946	0.914	0.943	11111	0.797	488580610	43972	1200	0.637	783
	e90	0.953	0.91	0.948	11355	0.85	440208073	38767	1315	0.561	866
	e105	0.964	0.93	0.961	15204	0.797	431257742	28364	1021	0.557	1073
	e120	0.965	0.907	0.962	12793	0.813	434973773	34000	1011	0.545	823
	e135	0.966	0.916	0.964	10587	0.858	465793759	43996	1285	0.575	876
	d0	0.96	0.926	0.956	11533	0.896	545581979	47306	1314	0.505	934
	d7	0.97	0.935	0.969	9711	0.875	547136280	56341	1380	0.578	767
	d14	0.97	0.926	0.968	11753	0.89	583781758	49670	1019	0.659	1789
	d21	0.97	0.929	0.967	10429	0.88	571702340	54818	1005	0.651	2116
	d28	0.966	0.942	0.965	11669	0.856	733864630	62890	528	0.58	5334
	d35	0.969	0.927	0.967	17505	0.848	532458471	30417	781	0.584	2367
	d42	0.968	0.944	0.967	21074	0.852	601899250	28561	1027	0.395	3587
	d49	0.969	0.944	0.967	13959	0.828	674427088	48314	1246	0.411	1575
	d56	0.972	0.939	0.969	12327	0.837	541205396	43904	1317	0.483	2335
	d90	0.966	0.922	0.965	6824	0.879	627157292	91904	1689	0.662	597
Goats	e45	0.963	0.943	0.962	8716	0.931	589537770	67638	1373	0.767	675
	e60	0.959	0.922	0.958	7338	0.9	733974292	100023	1592	0.734	571
	e75	0.973	0.941	0.971	7355	0.901	555224370	75489	1373	0.734	638
	e90	0.951	0.903	0.944	8330	0.911	584794925	70203	1163	0.748	540
	e105	0.961	0.907	0.956	7008	0.913	552490609	78837	1106	0.786	543
	e120	0.943	0.91	0.94	6784	0.912	604156190	89056	1163	0.778	485
	e135	0.964	0.912	0.959	12733	0.914	632997802	49713	632	0.775	803
	d0	0.942	0.91	0.94	7172	0.912	486042804	67769	1223	0.722	636
	d7	0.957	0.902	0.952	7888	0.91	645987959	81895	1169	0.731	1654
	d14	0.942	0.912	0.94	6033	0.914	580098439	96154	1276	0.737	615
	d21	0.962	0.908	0.957	8283	0.907	606399607	73210	1352	0.647	674
	d28	0.951	0.882	0.946	9052	0.892	442648609	48900	908	0.672	1658
	d35	0.962	0.901	0.957	8606	0.902	710560480	82565	1038	0.769	634
	d42	0.963	0.904	0.957	8424	0.886	493025608	58526	960	0.668	962
	d49	0.963	0.91	0.957	10320	0.903	608696656	58982	562	0.78	2944
	d56	0.948	0.878	0.944	8497	0.884	603126771	70981	1169	0.641	605
	d90	0.964	0.935	0.963	7211	0.919	702597920	97434	1276	0.783	521

## Sheet: Table S3
Table S3. Clusters of expressed genes defined by rumen scRNA-Seq expression data in sheep.
The column name annotation: p_val (p_value); avg_logFC (average log fold change); pct.1 (ratio of cells in this cluster that expressed the gene); pct.2 (ratio of cells in the rest of clusters that expressed the gene); p_val_adj (Bonferroni corrected p_value)
P_val	Avg_log2FC	Pct.1	Pct.2	P_val_adj	Clusters	Genes
0	2.58095	0.996	0.343	0	0	CA1
0	2.36427	0.726	0.14	0	0	S100A8
0	2.33606	0.995	0.346	0	0	TST
0	2.0846	0.999	0.423	0	0	KRT17
0	2.01854	0.132	0.014	0	0	ENSOARG00020026082
0	1.99849	0.715	0.175	0	0	S100A12
0	1.99841	0.993	0.368	0	0	ENSOARG00020023904
0	1.94887	0.99	0.343	0	0	ENSOARG00020023920
0	1.74665	0.129	0.014	0	0	ENSOARG00020026068
0	1.71055	0.987	0.56	0	0	CHCHD10
0	1.58928	0.992	0.629	0	0	PRDX6
0	1.58426	0.999	0.585	0	0	S100A2
0	1.58131	0.965	0.334	0	0	C15orf48
0	1.54761	1	0.99	0	0	COX3
0	1.54082	0.988	0.427	0	0	ENSOARG00020015582
0	1.50045	0.954	0.369	0	0	SQOR
0	1.49201	0.86	0.203	0	0	ENSOARG00020009302
0	1.45228	0.623	0.139	0	0	ENSOARG00020000744
0	1.40735	0.912	0.246	0	0	SELENBP1
0	1.39148	0.921	0.247	0	0	UGT1A1
0	1.38982	0.89	0.342	0	0	DHRS7
0	1.35958	1	0.984	0	0	COX1
0	1.26284	0.99	0.763	0	0	ENSOARG00020011058
0	1.25115	0.747	0.233	0	0	SLC16A1
0	1.23584	0.99	0.804	0	0	MGST3
0	1.20496	0.865	0.484	0	0	CYCS
0	1.19653	0.711	0.14	0	0	ENSOARG00020014505
0	1.18237	0.822	0.228	0	0	ENSOARG00020014406
0	1.13398	0.898	0.412	0	0	ETHE1
0	1.11885	0.908	0.433	0	0	ENSOARG00020017413
0	1.11599	0.961	0.688	0	0	ENSOARG00020018193
0	1.0951	0.795	0.327	0	0	SFN
0	1.05884	0.689	0.332	0	0	ENSOARG00020014591
0	1.03992	0.857	0.341	0	0	AK2
0	1.03411	0.614	0.152	0	0	FABP4
0	1.03244	0.954	0.681	0	0	COX5A
0	1.02561	0.52	0.096	0	0	ENSOARG00020022244
0	1.00891	0.797	0.303	0	0	CMBL
0	1.00269	0.931	0.639	0	0	UQCRQ
0	0.994624	0.984	0.823	0	0	ENSOARG00020016302
0	0.991918	0.971	0.756	0	0	UQCR10
0	0.989185	0.786	0.351	0	0	SOD2
0	0.988821	0.821	0.317	0	0	CLCA2
0	0.988646	0.762	0.28	0	0	MGST1
0	0.952253	0.554	0.11	0	0	ENSOARG00020006419
0	0.944535	0.997	0.895	0	0	ENSOARG00020013487
0	0.929715	0.975	0.703	0	0	TSPO
0	0.91206	0.883	0.429	0	0	BLVRB
0	0.910823	0.551	0.099	0	0	ENSOARG00020014854
0	0.899982	1	0.971	0	0	COX2
0	0.890495	0.567	0.188	0	0	ENSOARG00020017319
0	0.886077	1	0.994	0	0	CYTB
0	0.866172	0.997	0.824	0	0	ND5
0	0.860022	0.984	0.871	0	0	ENSOARG00020022065
0	0.859906	0.953	0.712	0	0	COX6B1
0	0.848853	0.622	0.203	0	0	ENSOARG00020015070
0	0.842739	1	0.99	0	0	ND4
0	0.836736	0.905	0.416	0	0	AHCY
0	0.822064	0.933	0.618	0	0	PPP1R14B
0	0.801529	0.268	0.092	0	0	ENSOARG00020020785
0	0.799727	0.372	0.062	0	0	VNN2
0	0.792399	0.956	0.759	0	0	ENSOARG00020012134
0	0.792017	0.468	0.138	0	0	ENSOARG00020024411
0	0.790694	0.83	0.401	0	0	ENSOARG00020020724
0	0.788158	0.904	0.609	0	0	UQCRB
0	0.786972	0.998	0.946	0	0	COX4I1
0	0.785251	0.644	0.199	0	0	MCRIP2
0	0.778106	0.819	0.314	0	0	KRT5
0	0.770784	0.999	0.94	0	0	ND1
0	0.76905	0.728	0.332	0	0	ENSOARG00020017987
0	0.768884	0.8	0.367	0	0	ENSOARG00020019097
0	0.76743	0.737	0.289	0	0	ACSF2
0	0.752741	0.714	0.254	0	0	KRT19
0	0.750353	0.984	0.864	0	0	ATP5MC3
0	0.750054	0.827	0.422	0	0	UQCRC2
0	0.74614	0.484	0.108	0	0	ENSOARG00020014594
0	0.745335	0.849	0.471	0	0	NDUFB9
0	0.74189	0.734	0.261	0	0	ECM1
0	0.741308	0.944	0.699	0	0	NDUFA13
0	0.740341	0.827	0.465	0	0	CYC1
0	0.738043	1	0.988	0	0	ND2
0	0.731882	0.465	0.197	0	0	MT2
0	0.723048	0.947	0.678	0	0	ETFB
0	0.72045	0.966	0.773	0	0	ENSOARG00020017129
0	0.719288	0.479	0.138	0	0	THEM5
0	0.715607	0.797	0.394	0	0	UQCRC1
0	0.712835	0.956	0.775	0	0	ATP5PF
0	0.711693	0.837	0.452	0	0	MDH2
0	0.710728	0.627	0.206	0	0	HSD17B2
0	0.709671	0.919	0.632	0	0	PRDX5
0	0.70798	0.639	0.211	0	0	FBP2
0	0.707559	0.746	0.324	0	0	TUFM
0	0.707221	0.974	0.76	0	0	ATP5F1A
0	0.703617	0.981	0.819	0	0	HSP10
0	0.692317	0.719	0.34	0	0	ENSOARG00020010443
0	0.687191	0.977	0.82	0	0	ATP5PD
0	0.686516	0.646	0.243	0	0	ND6
0	0.677902	0.953	0.566	0	0	ENSOARG00020010357
0	0.672107	0.793	0.393	0	0	NDUFV1
0	0.670339	0.892	0.593	0	0	NDUFAB1
0	0.6687	0.973	0.837	0	0	ENSOARG00020021822
0	0.661387	0.908	0.47	0	0	PTGR1
0	0.661338	0.895	0.641	0	0	NDUFB7
0	0.661081	0.606	0.204	0	0	IMP4
0	0.65137	0.898	0.602	0	0	NDUFS8
0	0.649056	0.743	0.343	0	0	ENSOARG00020007692
0	0.647526	0.895	0.588	0	0	UQCRFS1
0	0.646494	0.965	0.819	0	0	ENSOARG00020022141
0	0.646304	0.578	0.183	0	0	ENSOARG00020019066
0	0.646154	0.841	0.522	0	0	NDUFS6
0	0.640678	0.523	0.151	0	0	ABCC3
0	0.638769	0.853	0.387	0	0	ALDH1A1
0	0.636882	0.967	0.82	0	0	COX8A
0	0.633025	0.948	0.758	0	0	ENSOARG00020002539
0	0.613515	1	0.987	0	0	ATP6
0	0.612922	0.975	0.847	0	0	ATP5ME
0	0.598502	0.868	0.565	0	0	FAM162A
0	0.585613	0.905	0.543	0	0	GPX1
0	0.585346	0.888	0.601	0	0	ENSOARG00020012172
0	0.58388	0.103	0.024	0	0	CCL20
0	0.582699	0.837	0.487	0	0	NDUFV2
0	0.57681	0.81	0.466	0	0	NDUFS7
0	0.576373	0.569	0.2	0	0	ME1
0	0.575616	0.56	0.209	0	0	ACAA2
0	0.573703	0.882	0.576	0	0	ENSOARG00020013805
0	0.573689	0.574	0.209	0	0	MAOA
0	0.565524	0.85	0.552	0	0	NDUFA12
0	0.554212	0.378	0.069	0	0	PAPSS2
0	0.551814	0.497	0.185	0	0	PDZK1IP1
0	0.548289	0.939	0.754	0	0	ATP5IF1
0	0.547126	0.867	0.547	0	0	ENSOARG00020014986
0	0.54147	0.451	0.11	0	0	PCK2
0	0.539236	0.982	0.846	0	0	TXN
0	0.536681	0.849	0.535	0	0	ENSOARG00020012952
0	0.530679	0.498	0.171	0	0	AMACR
0	0.528791	0.339	0.064	0	0	NRG1
0	0.527278	0.344	0.074	0	0	CES2
0	0.526368	0.571	0.215	0	0	DECR1
0	0.524647	0.435	0.13	0	0	ENSOARG00020019805
0	0.522188	0.793	0.452	0	0	ETFA
0	0.518686	1	0.996	0	0	ENSOARG00020000005
0	0.516369	0.572	0.232	0	0	ACAT1
0	0.514062	0.762	0.435	0	0	ENSOARG00020014432
0	0.504972	0.904	0.671	0	0	NME2
0	0.5045	0.9	0.681	0	0	ATP5MD.2
0	0.502766	0.735	0.403	0	0	MRPL40
0	0.50203	0.678	0.324	0	0	NDUFA9
0	0.495523	0.386	0.117	0	0	SLC26A2
0	0.495032	0.539	0.242	0	0	SERPINB1
0	0.489328	0.604	0.271	0	0	MRPS25
0	0.488181	0.799	0.499	0	0	NDUFA7
0	0.487961	0.671	0.33	0	0	APRT
0	0.487445	0.95	0.742	0	0	ATP5PO
0	0.487155	0.513	0.186	0	0	MTCH2
0	0.483682	0.16	0.022	0	0	ENSOARG00020006194
0	0.480394	0.737	0.403	0	0	ENSOARG00020012751
0	0.479474	0.494	0.172	0	0	ALAD
0	0.474032	0.878	0.658	0	0	DBI
0	0.472082	0.881	0.627	0	0	ENSOARG00020012190
0	0.470178	0.488	0.174	0	0	ETFDH
0	0.465169	0.859	0.469	0	0	CD9
0	0.464639	0.715	0.345	0	0	ATP1B1
0	0.462012	0.538	0.218	0	0	ENSOARG00020007668
0	0.460766	0.807	0.499	0	0	MICOS13
0	0.455699	0.884	0.6	0	0	ADH5
0	0.452843	0.393	0.153	0	0	SRM
0	0.449707	0.565	0.247	0	0	SURF1
0	0.446409	0.85	0.564	0	0	NDUFB5
0	0.445981	0.898	0.629	0	0	KRTCAP2
0	0.440153	0.348	0.097	0	0	ENSOARG00020000906
0	0.440104	0.987	0.795	0	0	S100A10
0	0.439019	0.33	0.123	0	0	HSPA6
0	0.435924	0.957	0.788	0	0	SLC25A3
0	0.433992	0.537	0.228	0	0	MPST
0	0.433952	0.571	0.249	0	0	TXN2
0	0.433364	0.444	0.168	0	0	ENSOARG00020014533
0	0.429251	0.234	0.081	0	0	ENSOARG00020011601
0	0.423795	0.446	0.201	0	0	HSPA1A
0	0.422035	0.702	0.369	0	0	TXNDC17
0	0.418616	0.649	0.336	0	0	GHITM
0	0.417529	0.311	0.063	0	0	HMGCS2
0	0.417336	0.987	0.905	0	0	ENSOARG00020010128
0	0.416124	0.515	0.204	0	0	RPP21
0	0.415854	0.301	0.057	0	0	CYP26A1
0	0.409012	0.761	0.458	0	0	SNRNP25
0	0.406029	0.957	0.69	0	0	ENSOARG00020018857
0	0.405306	0.706	0.382	0	0	ALDOA
0	0.401932	0.901	0.674	0	0	NDUFA2
0	0.39813	0.921	0.701	0	0	NDUFB10
0	0.397259	0.36	0.114	0	0	GPT
0	0.396386	0.263	0.062	0	0	ENSOARG00020006250
0	0.394472	0.573	0.277	0	0	MRPL34
0	0.393304	0.479	0.195	0	0	TBRG4
0	0.391802	0.419	0.151	0	0	AP1M2
0	0.387988	0.343	0.111	0	0	ENSOARG00020026390
0	0.387817	0.494	0.21	0	0	LDHA
0	0.38699	0.435	0.158	0	0	AIFM1
0	0.385331	0.553	0.261	0	0	ABHD11
0	0.383994	0.505	0.226	0	0	HINT2
0	0.383961	0.43	0.159	0	0	ENDOG
0	0.38359	0.469	0.214	0	0	FERMT1
0	0.382686	0.522	0.223	0	0	MRPL12
0	0.379314	0.799	0.513	0	0	MPC2
0	0.379059	1	0.994	0	0	ENSOARG00020000003
0	0.376272	0.841	0.568	0	0	ENSOARG00020006995
0	0.372044	0.256	0.055	0	0	AOX1
0	0.371145	0.786	0.525	0	0	NDUFB4
0	0.371098	0.693	0.41	0	0	ENSOARG00020015612
0	0.370007	0.261	0.052	0	0	IL1R2
0	0.369667	0.517	0.237	0	0	BPNT1
0	0.368702	0.948	0.641	0	0	ENSOARG00020018871
0	0.367484	0.442	0.173	0	0	PCCB
0	0.364705	0.877	0.616	0	0	SNRPG
0	0.363906	0.614	0.318	0	0	PHB
0	0.363641	0.551	0.265	0	0	PLIN2
0	0.363111	0.674	0.372	0	0	HIGD2A
0	0.361756	0.44	0.179	0	0	TRAP1
0	0.361023	0.772	0.496	0	0	NDUFA8
0	0.360984	0.281	0.067	0	0	AHCYL2
0	0.356101	0.52	0.245	0	0	MMUT
0	0.355813	0.5	0.215	0	0	TMEM238
0	0.35407	0.754	0.437	0	0	FKBP11
0	0.353648	0.814	0.53	0	0	NDUFS2
0	0.353577	0.753	0.468	0	0	SUCLG1
0	0.352301	0.315	0.099	0	0	SLC22A18
0	0.352176	0.404	0.157	0	0	ENSOARG00020000633
0	0.3506	0.664	0.367	0	0	ARHGAP10
0	0.349549	0.382	0.162	0	0	PPARG
0	0.349437	0.97	0.855	0	0	ENSOARG00020008962
0	0.349019	0.565	0.27	0	0	MRPL51
0	0.346834	0.753	0.391	0	0	IDH1
0	0.346828	0.528	0.231	0	0	HSDL2
0	0.346669	0.507	0.227	0	0	ENSOARG00020006477
0	0.345675	0.446	0.183	0	0	PRDX3
0	0.345108	0.525	0.248	0	0	MRPL50
0	0.34484	0.826	0.542	0	0	SLIRP
0	0.3437	0.349	0.105	0	0	TIMM8A
0	0.343428	0.361	0.151	0	0	GLRX
0	0.342436	0.347	0.137	0	0	ENSOARG00020022604
0	0.339466	1	0.988	0	0	ENSOARG00020011816
0	0.339334	0.707	0.406	0	0	IDH3G
0	0.337181	0.922	0.651	0	0	ENSOARG00020007966
0	0.336951	0.807	0.565	0	0	ENSOARG00020003553
0	0.335891	0.899	0.554	0	0	SYNE2
0	0.335658	0.456	0.211	0	0	MGST2
0	0.335608	0.429	0.177	0	0	C1QBP
0	0.334432	0.569	0.292	0	0	PNKD
0	0.332924	0.597	0.319	0	0	FKBP4
0	0.332554	0.615	0.308	0	0	PLTP
0	0.331459	0.436	0.174	0	0	COQ9
0	0.329025	0.385	0.156	0	0	MPND
0	0.328719	0.531	0.289	0	0	ENSOARG00020025903
0	0.324262	0.326	0.119	0	0	HSPA4L
0	0.321506	0.791	0.411	0	0	CKB
0	0.31785	0.525	0.261	0	0	NAXE
0	0.316326	0.828	0.56	0	0	MRPS26
0	0.316315	0.792	0.527	0	0	FBL
0	0.31489	0.328	0.107	0	0	PPA1
0	0.31267	0.875	0.38	0	0	KRT15
0	0.311676	0.352	0.142	0	0	TPMT
0	0.310796	0.823	0.593	0	0	NDUFA11
0	0.310119	0.299	0.101	0	0	MTARC2
0	0.309354	0.676	0.387	0	0	NDUFB6
0	0.307266	0.517	0.255	0	0	TUBA4A
0	0.30712	0.32	0.118	0	0	TMPRSS11A
0	0.306668	0.861	0.51	0	0	PLP2
0	0.305637	0.472	0.218	0	0	MCEE
0	0.305262	0.993	0.933	0	0	UQCRH
0	0.305126	0.51	0.248	0	0	FH
0	0.305015	0.617	0.332	0	0	NDUFA10
0	0.304044	0.976	0.879	0	0	ENSOARG00020023270
0	0.302471	0.609	0.329	0	0	NDUFAF3
0	0.29987	0.212	0.061	0	0	ENSOARG00020008614
0	0.296132	0.517	0.255	0	0	PHB2
0	0.295544	0.324	0.123	0	0	AKAP1
0	0.295496	0.443	0.199	0	0	COQ7
0	0.294978	1	0.981	0	0	RACK1
0	0.294564	0.487	0.224	0	0	MRPL38
0	0.294032	0.987	0.865	0	0	HSPB1
0	0.293764	0.789	0.531	0	0	NDUFB2
0	0.293754	1	0.983	0	0	RPL28
0	0.292109	0.997	0.95	0	0	ND3
0	0.291205	0.475	0.227	0	0	MRPL37
0	0.290009	0.9	0.652	0	0	GAPDH
0	0.288705	0.303	0.12	0	0	ENSOARG00020023753
0	0.288559	0.526	0.258	0	0	RNASEH2C
0	0.288041	0.472	0.233	0	0	DTYMK
0	0.287881	0.5	0.247	0	0	MACROD1
0	0.287873	0.847	0.583	0	0	CUTA
0	0.287395	0.654	0.327	0	0	ENSOARG00020017637
0	0.285542	0.4	0.171	0	0	HSPA9
0	0.284672	0.43	0.183	0	0	MRPS31
0	0.284669	0.47	0.21	0	0	PALMD
0	0.284528	0.706	0.434	0	0	ENSOARG00020026470
0	0.283779	0.672	0.389	0	0	TKT
0	0.283647	0.408	0.185	0	0	AACS
0	0.281865	0.848	0.622	0	0	RANBP1
0	0.281446	0.944	0.806	0	0	MICOS10
0	0.280864	0.364	0.151	0	0	ECHDC1
0	0.280522	0.58	0.318	0	0	MRPL11
0	0.280379	0.626	0.36	0	0	TMEM208
0	0.280262	0.513	0.256	0	0	TIMM50
0	0.278642	0.267	0.079	0	0	ENSOARG00020024560
0	0.277632	0.457	0.216	0	0	APEH
0	0.276773	0.508	0.257	0	0	MTX1
0	0.275125	0.314	0.135	0	0	CST6
0	0.274832	0.224	0.06	0	0	TNS4
0	0.27442	0.431	0.202	0	0	LRPPRC
0	0.274043	0.531	0.271	0	0	MRPS11
0	0.272047	0.537	0.287	0	0	GSTM3
0	0.271315	0.611	0.345	0	0	AKR1A1
0	0.271103	0.776	0.52	0	0	ATP5F1B
0	0.26954	0.56	0.306	0	0	NHP2
0	0.269235	0.4	0.177	0	0	MTIF3
0	0.269208	0.351	0.133	0	0	ADK
0	0.268965	0.754	0.49	0	0	PCBD2
0	0.268355	0.478	0.236	0	0	ENSOARG00020008734
0	0.267265	0.49	0.243	0	0	CCDC58
0	0.267053	0.237	0.101	0	0	GPX2
0	0.266682	0.526	0.278	0	0	MRPL55
0	0.266296	0.597	0.271	0	0	ENSOARG00020024147
0	0.266248	0.414	0.186	0	0	COMTD1
0	0.265597	0.51	0.262	0	0	ENSOARG00020003833
0	0.265066	0.19	0.063	0	0	ENSOARG00020021657
0	0.26241	0.513	0.256	0	0	MRPS36
0	0.261704	0.589	0.307	0	0	DSP
0	0.260839	0.428	0.204	0	0	ENSOARG00020004438
0	0.260718	0.82	0.566	0	0	NDUFC2
0	0.260458	0.284	0.128	0	0	ENSOARG00020024927
0	0.259725	0.41	0.189	0	0	SCO2
0	0.258268	0.37	0.152	0	0	MRPS35
0	0.257578	0.554	0.307	0	0	CSKMT
0	0.257567	0.323	0.126	0	0	NDUFS1
0	0.257385	1	0.988	0	0	RPS9
0	0.25677	0.854	0.626	0	0	ENSOARG00020023960
0	0.255139	0.439	0.213	0	0	ENSOARG00020000539
0	0.254791	0.202	0.058	0	0	CTSL
0	0.254433	0.51	0.264	0	0	ZNF593
0	0.254243	0.459	0.223	0	0	GADD45GIP1
0	0.253963	0.614	0.358	0	0	ENSOARG00020014726
0	0.250233	0.932	0.731	0	0	SOD1
7.24e-235	0.295185	0.167	0.092	1.35e-230	0	AREG
0	2.31144	0.894	0.223	0	1	DLK1
0	2.19429	0.634	0.119	0	1	COL8A1
0	2.11639	0.993	0.291	0	1	LUM
0	1.95013	0.996	0.472	0	1	DCN
0	1.93312	0.901	0.302	0	1	FBLN1
0	1.77369	0.981	0.355	0	1	COL1A1
0	1.72574	0.65	0.163	0	1	COL12A1
0	1.61804	0.871	0.527	0	1	ENSOARG00020007111
0	1.57491	0.982	0.358	0	1	COL1A2
0	1.56896	0.434	0.065	0	1	SCRG1
0	1.56408	0.399	0.059	0	1	THBS4
0	1.55396	0.699	0.173	0	1	TCF21
0	1.54014	0.824	0.227	0	1	VCAN
0	1.49126	0.613	0.146	0	1	ECRG4
0	1.47896	0.61	0.167	0	1	ENSOARG00020008540
0	1.4434	0.995	0.402	0	1	COL3A1
0	1.43784	0.872	0.285	0	1	MDK
0	1.41845	0.586	0.157	0	1	OGN
0	1.41502	0.983	0.506	0	1	IGF2
0	1.40158	0.588	0.16	0	1	ZEB2
0	1.40084	0.57	0.179	0	1	MYH10
0	1.39395	0.753	0.284	0	1	FSTL1
0	1.38463	0.458	0.094	0	1	COL6A3
0	1.37941	0.336	0.078	0	1	SFRP2
0	1.37675	0.916	0.567	0	1	RBP1
0	1.3741	0.848	0.393	0	1	CDKN1C
0	1.34281	0.664	0.241	0	1	LTBP4
0	1.30777	0.453	0.145	0	1	ENSOARG00020006805
0	1.27011	0.536	0.226	0	1	FILIP1L
0	1.2648	0.732	0.224	0	1	PCOLCE
0	1.26344	0.607	0.285	0	1	CKAP4
0	1.25071	0.979	0.847	0	1	CD63
0	1.2471	0.455	0.194	0	1	SMARCA2
0	1.2279	0.689	0.242	0	1	TCF4
0	1.22616	0.491	0.11	0	1	SVEP1
0	1.20738	0.38	0.098	0	1	IRF1
0	1.20184	0.735	0.232	0	1	PLAC9
0	1.19677	0.592	0.283	0	1	COL18A1
0	1.19233	0.876	0.437	0	1	MARCKS
0	1.17554	0.288	0.048	0	1	ENSOARG00020002928
0	1.14545	0.348	0.05	0	1	LOX
0	1.14047	0.584	0.196	0	1	NOVA1
0	1.13246	0.625	0.294	0	1	GLIPR2
0	1.12606	0.536	0.283	0	1	CCDC88A
0	1.1231	0.623	0.396	0	1	Metazoa-SRP.8
0	1.10795	0.729	0.336	0	1	EMP3
0	1.10449	0.574	0.238	0	1	COL5A2
0	1.093	0.901	0.32	0	1	APOE
0	1.08175	0.409	0.131	0	1	TMTC1
0	1.07889	0.562	0.339	0	1	TPM4
0	1.06346	0.431	0.11	0	1	MMP23B
0	1.06001	0.383	0.101	0	1	MAP1A
0	1.05235	0.728	0.556	0	1	HNRNPDL
0	1.0492	0.378	0.098	0	1	COL6A2
0	1.04352	0.434	0.119	0	1	LAMA2
0	1.04117	0.372	0.159	0	1	COL14A1
0	1.03644	0.728	0.321	0	1	IGFBP4
0	1.03626	0.525	0.232	0	1	SEPTIN11
0	1.03456	0.493	0.242	0	1	GALT
0	1.03422	0.433	0.139	0	1	DAB2
0	1.03262	0.731	0.252	0	1	SPARCL1
0	1.03005	0.49	0.222	0	1	CCND1
0	1.01845	0.405	0.278	0	1	TIPARP
0	1.01667	0.253	0.039	0	1	COL25A1
0	1.00993	0.71	0.573	0	1	HNRNPA1
0	1.00534	0.98	0.905	0	1	PPIB
0	0.992007	0.383	0.12	0	1	FGFR1
0	0.9901	0.706	0.457	0	1	DDAH2
0	0.980391	0.449	0.206	0	1	SMARCA1
0	0.978355	0.784	0.299	0	1	POSTN
0	0.974408	0.497	0.186	0	1	PDLIM3
0	0.973978	0.922	0.425	0	1	LGALS1
0	0.9718	0.884	0.78	0	1	GNAS
0	0.971736	0.409	0.124	0	1	NEXN
0	0.965785	0.472	0.221	0	1	LOXL1
0	0.965069	0.574	0.342	0	1	BTG2
0	0.962022	0.638	0.492	0	1	RRBP1
0	0.958605	0.237	0.048	0	1	SCT
0	0.952648	0.675	0.513	0	1	PSIP1
0	0.950948	0.326	0.083	0	1	COL5A1
0	0.944034	0.489	0.292	0	1	COL16A1
0	0.943301	0.456	0.162	0	1	NES
0	0.94188	0.484	0.215	0	1	EFEMP2
0	0.939826	0.539	0.293	0	1	CDC42EP5
0	0.92925	0.351	0.114	0	1	SYNE1
0	0.921041	0.546	0.356	0	1	ARF4
0	0.911293	0.441	0.258	0	1	APP
0	0.910174	0.517	0.238	0	1	METRNL
0	0.905141	0.301	0.063	0	1	SSC5D
0	0.898195	0.377	0.224	0	1	PAXBP1
0	0.894985	0.303	0.081	0	1	FAT4
0	0.892847	0.381	0.164	0	1	ENSOARG00020017596
0	0.888644	0.468	0.183	0	1	EDNRA
0	0.885522	0.233	0.051	0	1	LYPD1
0	0.880576	0.752	0.548	0	1	FCGRT
0	0.878932	0.283	0.068	0	1	FBN2
0	0.87544	0.681	0.322	0	1	RARRES2
0	0.874236	0.3	0.108	0	1	ID4
0	0.867749	0.576	0.441	0	1	RBPJ
0	0.858891	0.305	0.094	0	1	FN1
0	0.855165	0.346	0.137	0	1	TMEM263
0	0.852733	0.262	0.048	0	1	SLIT3
0	0.848017	0.398	0.268	0	1	GOLIM4
0	0.847391	0.407	0.144	0	1	SPON2
0	0.844025	0.435	0.178	0	1	SPARC
0	0.838255	0.333	0.113	0	1	MEIS2
0	0.833454	0.701	0.443	0	1	SELENOM
0	0.827346	0.527	0.35	0	1	CCNL1
0	0.8265	0.303	0.11	0	1	CDH11
0	0.82594	0.481	0.342	0	1	ACBD3
0	0.823631	0.359	0.119	0	1	PMP22
0	0.814319	0.178	0.011	0	1	ENSOARG00020005956
0	0.81276	0.522	0.358	0	1	SVBP
0	0.810712	0.484	0.347	0	1	Metazoa-SRP.6
0	0.809054	0.402	0.209	0	1	FAM114A1
0	0.807908	0.453	0.248	0	1	P4HA2
0	0.806004	0.383	0.157	0	1	ADGRL2
0	0.805958	0.493	0.223	0	1	TIMP2
0	0.805668	0.441	0.301	0	1	ENSOARG00020012860
0	0.803967	0.593	0.478	0	1	DDX3X
0	0.799779	0.427	0.302	0	1	RYBP
0	0.793882	0.84	0.657	0	1	NDUFA4
0	0.793752	0.294	0.08	0	1	PDGFRA
0	0.791521	0.685	0.54	0	1	S100A13
0	0.790075	0.747	0.643	0	1	HMGN3
0	0.787039	0.234	0.101	0	1	ENPP2
0	0.784092	0.939	0.864	0	1	DDX5
0	0.780295	0.423	0.259	0	1	ASPH
0	0.778692	0.42	0.289	0	1	SPATS2L
0	0.778358	0.24	0.06	0	1	TMEM132C
0	0.77756	0.499	0.224	0	1	ENSOARG00020003348
0	0.772131	0.909	0.827	0	1	ENSOARG00020017428
0	0.771571	0.451	0.336	0	1	DDX58
0	0.771456	0.809	0.714	0	1	ENSOARG00020006271
0	0.767962	0.583	0.415	0	1	SRI
0	0.763926	0.294	0.073	0	1	ENSOARG00020006932
0	0.76361	0.451	0.216	0	1	ENSOARG00020013742
0	0.761271	0.594	0.475	0	1	CCNI
0	0.760833	0.254	0.109	0	1	ENSOARG00020006380
0	0.760664	0.24	0.069	0	1	ASPN
0	0.759023	0.306	0.09	0	1	REM1
0	0.753762	0.672	0.57	0	1	MORF4L1
0	0.752601	0.654	0.576	0	1	IK
0	0.75104	0.821	0.768	0	1	ENSOARG00020017329
0	0.750083	0.42	0.21	0	1	CCDC80
0	0.749938	0.465	0.343	0	1	HNRNPK
0	0.749689	0.433	0.308	0	1	SPAG9
0	0.748387	0.949	0.798	0	1	FOS
0	0.745259	0.236	0.057	0	1	ENSOARG00020012853
0	0.738229	0.235	0.071	0	1	PHF13
0	0.735585	0.271	0.086	0	1	PGM5
0	0.732183	0.205	0.044	0	1	NDNF
0	0.730502	0.365	0.189	0	1	KLF2
0	0.729622	0.286	0.13	0	1	JUNB
0	0.729453	0.236	0.071	0	1	ANXA6
0	0.728346	0.341	0.226	0	1	KAT6B
0	0.727447	0.209	0.036	0	1	ABCC9
0	0.726874	0.344	0.199	0	1	ENSOARG00020023650
0	0.726379	0.313	0.133	0	1	HDGFL3
0	0.723063	0.373	0.246	0	1	ZFYVE16
0	0.720378	0.383	0.243	0	1	RNF19A
0	0.720141	0.588	0.505	0	1	ENSOARG00020000452
0	0.719398	0.38	0.169	0	1	SGCE
0	0.718215	0.223	0.058	0	1	ENSOARG00020006597
0	0.716638	0.513	0.432	0	1	ENSOARG00020002335
0	0.715105	0.713	0.647	0	1	ENSOARG00020002686
0	0.70862	0.48	0.392	0	1	PCM1
0	0.708592	0.742	0.611	0	1	ID1
0	0.707213	0.261	0.133	0	1	SFRP1
0	0.706853	0.357	0.213	0	1	SKIL
0	0.706208	0.453	0.235	0	1	ITIH5
0	0.706146	0.297	0.117	0	1	FBN1
0	0.703878	0.645	0.602	0	1	TPR
0	0.703416	0.575	0.497	0	1	EIF1B
0	0.703179	0.627	0.573	0	1	HNRNPU
0	0.701685	0.627	0.541	0	1	JAK1
0	0.70118	0.607	0.548	0	1	ENSOARG00020017232
0	0.698673	0.779	0.328	0	1	COL4A1
0	0.697287	0.61	0.53	0	1	PTOV1
0	0.695658	0.242	0.078	0	1	PEG10
0	0.69433	0.267	0.092	0	1	MATN2
0	0.693986	0.297	0.152	0	1	MYO1B
0	0.692559	0.573	0.523	0	1	SMARCA5
0	0.69157	0.252	0.118	0	1	HES1
0	0.6903	0.387	0.246	0	1	IFT27
0	0.688839	0.415	0.312	0	1	CHD3
0	0.687023	0.465	0.377	0	1	NENF
0	0.686749	0.946	0.879	0	1	ENSOARG00020005570
0	0.686287	0.4	0.317	0	1	PSMD12
0	0.680615	0.392	0.236	0	1	HIST2H2AC
0	0.680209	0.211	0.07	0	1	ENSOARG00020008987
0	0.677603	0.357	0.171	0	1	FKBP7
0	0.677298	0.328	0.24	0	1	NONO
0	0.67315	0.518	0.403	0	1	RBM3
0	0.670217	0.762	0.716	0	1	SON
0	0.668462	0.436	0.297	0	1	MAGED2
0	0.668225	0.47	0.383	0	1	ENSOARG00020022136
0	0.667969	0.648	0.609	0	1	ANKRD12
0	0.667334	0.251	0.082	0	1	VCAM1
0	0.666585	0.348	0.223	0	1	PTTG1IP
0	0.665134	0.312	0.178	0	1	CBX1
0	0.664924	0.492	0.402	0	1	ENSOARG00020023340
0	0.662338	0.984	0.933	0	1	H3F3A
0	0.658325	0.454	0.404	0	1	ST13
0	0.657903	0.224	0.065	0	1	DPYSL3
0	0.653621	0.22	0.062	0	1	CAPRIN2
0	0.649871	0.568	0.51	0	1	ENSOARG00020014495
0	0.649837	0.553	0.507	0	1	PAFAH1B3
0	0.649312	0.216	0.05	0	1	MMP2
0	0.64871	0.62	0.554	0	1	ENSOARG00020021190
0	0.646616	0.2	0.061	0	1	IGF2R
0	0.646273	0.476	0.424	0	1	ENSOARG00020003552
0	0.645182	0.563	0.512	0	1	HNRNPD
0	0.644922	0.606	0.571	0	1	DDX21
0	0.643959	0.294	0.168	0	1	RBFOX2
0	0.636939	0.938	0.883	0	1	ENSOARG00020023270
0	0.635628	0.349	0.228	0	1	EGR1
0	0.634141	0.297	0.171	0	1	LTBP3
0	0.631805	0.262	0.14	0	1	LRP1
0	0.631167	0.297	0.175	0	1	TCF12
0	0.631002	0.35	0.258	0	1	SPSB3
0	0.630186	0.215	0.066	0	1	NCAM1
0	0.630121	0.261	0.157	0	1	CNTLN
0	0.629447	0.367	0.225	0	1	GPX8
0	0.629445	0.24	0.075	0	1	DCHS1
0	0.629125	0.63	0.571	0	1	DDX17
0	0.627865	0.436	0.275	0	1	PTN
0	0.627606	0.352	0.265	0	1	HTATSF1
0	0.623158	0.325	0.168	0	1	ENSOARG00020001067
0	0.622897	0.596	0.557	0	1	RTF1
0	0.622838	0.292	0.174	0	1	P3H4
0	0.622141	0.269	0.162	0	1	KLF11
0	0.621607	0.67	0.536	0	1	ENSOARG00020017201
0	0.621143	0.644	0.602	0	1	RTRAF
0	0.620184	0.34	0.242	0	1	ENSOARG00020019330
0	0.618198	0.382	0.278	0	1	RBMS1
0	0.616068	0.567	0.487	0	1	PNRC1
0	0.615418	0.512	0.48	0	1	BPTF
0	0.61504	0.587	0.559	0	1	U2SURP
0	0.614775	0.64	0.598	0	1	ARGLU1
0	0.614262	0.427	0.368	0	1	ENSOARG00020006505
0	0.61188	0.412	0.34	0	1	PARP1
0	0.609173	0.3	0.149	0	1	CEP170
0	0.608594	0.288	0.123	0	1	DLC1
0	0.607431	0.29	0.182	0	1	AP2B1
0	0.607089	0.437	0.392	0	1	CZIB
0	0.605972	0.711	0.664	0	1	CNBP
0	0.601568	0.322	0.231	0	1	NFIX
0	0.599874	0.291	0.122	0	1	BCHE
0	0.598615	0.189	0.092	0	1	Metazoa-SRP.7
0	0.598119	0.2	0.079	0	1	ENSOARG00020007267
0	0.596692	0.672	0.641	0	1	HNRNPH3
0	0.596662	0.646	0.61	0	1	PRDX4
0	0.596004	0.159	0.029	0	1	ANGPT1
0	0.595193	0.198	0.093	0	1	HACD1
0	0.590076	0.482	0.421	0	1	ATXN7L3B
0	0.589755	0.448	0.399	0	1	ENSOARG00020014959
0	0.586973	0.934	0.876	0	1	PFDN5
0	0.586714	0.485	0.44	0	1	CWC15
0	0.58581	0.177	0.037	0	1	NKD1
0	0.58437	0.714	0.69	0	1	ENSOARG00020011332
0	0.583903	0.228	0.094	0	1	RBP4
0	0.581938	0.717	0.606	0	1	ITGB1
0	0.578809	0.236	0.119	0	1	PHACTR2
0	0.576874	0.156	0.025	0	1	SRPX2
0	0.576715	0.856	0.808	0	1	EIF3E
0	0.574396	0.189	0.097	0	1	EDN3
0	0.57416	0.248	0.163	0	1	CDC37L1
0	0.574153	0.553	0.533	0	1	CDC5L
0	0.569222	0.444	0.296	0	1	FERMT2
0	0.56677	0.299	0.188	0	1	P4HA1
0	0.56658	0.297	0.162	0	1	COPZ2
0	0.565737	0.145	0.056	0	1	ENSOARG00020003565
0	0.565522	0.349	0.156	0	1	COL4A2
0	0.565477	0.964	0.898	0	1	ENSOARG00020009396
0	0.564375	0.798	0.724	0	1	NUCKS1
0	0.563632	0.656	0.623	0	1	ENSOARG00020001641
0	0.563233	0.243	0.121	0	1	CAP2
0	0.562564	0.456	0.325	0	1	RDX
0	0.561406	0.261	0.163	0	1	ENSOARG00020024914
0	0.560449	0.268	0.166	0	1	JUND
0	0.558549	0.883	0.827	0	1	EIF3M
0	0.558521	0.628	0.62	0	1	CLTA
0	0.557435	0.184	0.081	0	1	SOCS3
0	0.555919	0.194	0.056	0	1	PTH1R
0	0.554914	0.235	0.141	0	1	NFIB
0	0.554889	0.158	0.059	0	1	MT1A
0	0.554848	0.555	0.525	0	1	CALR
0	0.554365	0.166	0.056	0	1	CCNG2
0	0.551773	0.223	0.13	0	1	TRAF6
0	0.549449	0.258	0.163	0	1	SEPTIN2
0	0.546084	0.224	0.091	0	1	GJC1
0	0.54441	0.194	0.058	0	1	COLEC12
0	0.544345	0.996	0.978	0	1	FTH1
0	0.544297	0.649	0.634	0	1	PNISR
0	0.541494	0.266	0.161	0	1	FOSB
0	0.538992	0.202	0.105	0	1	GOLM1
0	0.537157	0.592	0.574	0	1	ENSOARG00020002300
0	0.535546	0.175	0.046	0	1	KIF26B
0	0.533746	0.216	0.07	0	1	ABI3BP
0	0.533373	0.162	0.04	0	1	RSPO3
0	0.532844	0.247	0.143	0	1	LRP6
0	0.531983	0.946	0.906	0	1	RPL36AL
0	0.529387	0.223	0.118	0	1	H1-2
0	0.529303	0.607	0.613	0	1	ENSOARG00020017255
0	0.526904	0.193	0.089	0	1	H2AC6
0	0.526534	0.622	0.608	0	1	BRI3
0	0.525316	0.162	0.044	0	1	NID1
0	0.5214	0.252	0.156	0	1	IKBIP
0	0.520019	0.838	0.827	0	1	ENSOARG00020000997
0	0.517664	0.653	0.647	0	1	C19orf53
0	0.516515	0.989	0.492	0	1	VIM
0	0.513481	0.85	0.812	0	1	RABAC1
0	0.507256	0.209	0.096	0	1	PDE5A
0	0.506312	0.753	0.659	0	1	SEPTIN7
0	0.505198	0.231	0.099	0	1	ARHGAP28
0	0.500235	0.116	0.015	0	1	MAMDC2
0	0.499762	0.601	0.583	0	1	ENSOARG00020013402
0	0.495853	0.204	0.112	0	1	PRTFDC1
0	0.492759	0.218	0.111	0	1	ENSOARG00020016278
0	0.492641	0.992	0.964	0	1	RPL30
0	0.491059	0.132	0.039	0	1	NRK
0	0.490329	0.21	0.078	0	1	TMEM176B
0	0.489132	0.21	0.095	0	1	F2R
0	0.487823	0.12	0.026	0	1	CHN1
0	0.485918	0.209	0.101	0	1	ENSOARG00020007939
0	0.479368	0.145	0.049	0	1	THBS1
0	0.474688	0.687	0.645	0	1	ENSOARG00020019793
0	0.474524	0.201	0.1	0	1	DBN1
0	0.472906	0.149	0.035	0	1	CLEC11A
0	0.469567	0.108	0.018	0	1	TNC
0	0.46808	0.143	0.041	0	1	SULF1
0	0.467934	0.194	0.108	0	1	FKBP9
0	0.465213	0.572	0.398	0	1	ATF3
0	0.464711	0.739	0.736	0	1	NEDD8
0	0.46298	0.764	0.765	0	1	SRRM2
0	0.462893	0.188	0.064	0	1	PROS1
0	0.461825	0.792	0.78	0	1	SSR2
0	0.460431	0.158	0.065	0	1	MFAP2
0	0.459508	0.185	0.091	0	1	TCF7L1
0	0.455624	0.6	0.572	0	1	EIF4G2
0	0.453691	0.153	0.057	0	1	CARD11
0	0.453325	0.627	0.637	0	1	MTDH
0	0.450776	0.121	0.024	0	1	CPXM2
0	0.443367	0.153	0.053	0	1	WASF3
0	0.440569	0.172	0.083	0	1	GFPT1
0	0.439991	0.387	0.193	0	1	IFI6
0	0.43972	0.167	0.089	0	1	KLF10
0	0.438706	0.715	0.686	0	1	ENSOARG00020025507
0	0.43853	0.153	0.066	0	1	HSF2
0	0.436689	0.756	0.754	0	1	DEK
0	0.436655	0.16	0.062	0	1	PLEKHH2
0	0.436598	0.729	0.539	0	1	TIMP1
0	0.432912	0.659	0.675	0	1	HNRNPM
0	0.432405	0.861	0.83	0	1	TMA7
0	0.432235	0.983	0.933	0	1	H3F3A.1
0	0.432031	0.13	0.034	0	1	PDZRN3
0	0.427352	0.149	0.056	0	1	ENSOARG00020015694
0	0.426304	0.174	0.091	0	1	STK3
0	0.426031	0.13	0.039	0	1	ADAMTS19
0	0.42437	0.97	0.939	0	1	SERF2
0	0.424041	0.752	0.745	0	1	KARS1
0	0.422441	0.874	0.513	0	1	CALD1
0	0.418124	0.167	0.073	0	1	CEP85L
0	0.408112	0.669	0.683	0	1	CDKN2AIPNL
0	0.407505	0.117	0.028	0	1	CACNB2
0	0.406887	0.147	0.069	0	1	CAVIN1
0	0.406796	0.101	0.026	0	1	LRRN3
0	0.405512	0.224	0.127	0	1	LAMA4
0	0.404641	0.113	0.019	0	1	MFAP4
0	0.402887	0.803	0.761	0	1	SH3BGRL3
0	0.402684	0.109	0.017	0	1	ENSOARG00020006234
0	0.402661	0.143	0.064	0	1	PRKG1
0	0.400694	0.355	0.104	0	1	DPT
0	0.396863	0.701	0.7	0	1	HNRNPA2B1
0	0.385543	0.154	0.073	0	1	PCDHGC3
0	0.384241	0.119	0.05	0	1	PBX3
0	0.382435	0.155	0.073	0	1	ENSOARG00020024424
0	0.381674	0.141	0.052	0	1	PCDH18
0	0.380941	0.795	0.788	0	1	SERBP1
0	0.380852	0.122	0.043	0	1	EVA1B
0	0.375078	0.101	0.02	0	1	SLIT2
0	0.370932	0.109	0.028	0	1	ADGRA2
0	0.368529	0.121	0.041	0	1	OLFML3
0	0.368221	0.882	0.871	0	1	UBL5
0	0.368059	0.124	0.047	0	1	PDE1A
0	0.36381	0.852	0.831	0	1	HSP90B1
0	0.363701	0.762	0.768	0	1	EIF3G
0	0.361711	0.212	0.109	0	1	PRKAR2B
0	0.361671	0.547	0.303	0	1	FXYD1
0	0.358926	0.133	0.053	0	1	ZNF608
0	0.357201	0.104	0.022	0	1	THBS2
0	0.355592	0.15	0.074	0	1	PEAK1
0	0.354604	0.128	0.049	0	1	DOCK10
0	0.354145	0.137	0.058	0	1	NECTIN3
0	0.353329	0.136	0.046	0	1	ADAMTS2
0	0.353256	0.997	0.979	0	1	ENSOARG00020010263
0	0.348995	0.117	0.049	0	1	SNCAIP
0	0.348898	0.114	0.042	0	1	ENSOARG00020018633
0	0.3471	0.13	0.054	0	1	MPDZ
0	0.342723	0.91	0.775	0	1	JUN
0	0.342248	0.998	0.985	0	1	ENSOARG00020022981
0	0.341915	0.107	0.035	0	1	GPC6
0	0.3385	0.171	0.081	0	1	SYNM
0	0.336783	0.104	0.03	0	1	BICC1
0	0.334116	0.993	0.974	0	1	PTMA
0	0.329386	0.104	0.026	0	1	KCNJ8
0	0.328774	0.585	0.267	0	1	GNG11
0	0.326785	0.111	0.038	0	1	FGF2
0	0.326072	0.433	0.195	0	1	MYLK
0	0.323612	0.996	0.976	0	1	RPL26
0	0.321693	0.101	0.036	0	1	PKD2
0	0.316694	0.133	0.061	0	1	PTPRD
0	0.316128	0.115	0.049	0	1	HOXB7
0	0.314019	0.999	0.991	0	1	RPS27A
0	0.309415	0.103	0.036	0	1	FKBP10
0	0.309053	0.141	0.06	0	1	PDE3A
0	0.304325	0.999	0.992	0	1	RPL37
0	0.299804	0.182	0.084	0	1	FEZ1
0	0.296359	0.192	0.085	0	1	ECM2
0	0.294884	0.143	0.048	0	1	PDGFRL
0	0.290457	0.11	0.045	0	1	PPP1R9A
0	0.283173	0.993	0.951	0	1	RPS6
0	0.264278	0.975	0.941	0	1	HSPCA
0	0.263994	0.434	0.179	0	1	ACTA2
0	0.261158	0.812	0.79	0	1	H2AZ2
0	0.257833	0.998	0.988	0	1	RPL24
0	0.257719	0.631	0.538	0	1	ENSOARG00020017172
0	0.25204	0.999	0.994	0	1	RPL10
5.64e-308	0.349083	0.729	0.748	1.05e-303	1	SUB1
3.58e-304	0.610007	0.442	0.399	6.67e-300	1	LMAN1
3.75e-304	0.661981	0.337	0.26	6.97e-300	1	PIK3R1
4.07e-303	0.45473	0.215	0.129	7.56e-299	1	TET1
6.2e-300	0.562874	0.481	0.451	1.15e-295	1	SRP19
1.65e-295	0.43484	0.645	0.651	3.08e-291	1	rpl23a
1.16e-294	0.346325	0.137	0.067	2.16e-290	1	SPAG1
2.77e-294	0.281412	0.11	0.048	5.16e-290	1	NR2F1
6.9e-294	0.402818	0.181	0.101	1.28e-289	1	GNB4
1.74e-293	0.588241	0.371	0.297	3.24e-289	1	MCL1
1.36e-291	0.39063	0.263	0.166	2.52e-287	1	TUBA1A
1.03e-290	0.455055	0.176	0.099	1.92e-286	1	GLG1
2.01e-289	0.631757	0.241	0.164	3.75e-285	1	ENSOARG00020018569
1.51e-287	0.335042	0.118	0.053	2.82e-283	1	ITGA4
5.28e-287	0.393203	0.235	0.147	9.83e-283	1	CALML4
7.27e-287	0.603012	0.315	0.238	1.35e-282	1	IFT74
6.92e-282	0.40086	0.254	0.159	1.29e-277	1	TENT5A
1.6e-277	0.579395	0.455	0.408	2.98e-273	1	HNRNPA3
3.47e-277	0.620845	0.454	0.42	6.46e-273	1	YTHDC1
3.27e-273	0.420976	0.188	0.11	6.08e-269	1	H1-4
4.7e-273	0.344472	0.137	0.069	8.75e-269	1	FSCN1
7.02e-273	0.447809	0.586	0.609	1.31e-268	1	LAMTOR4
2.25e-272	0.391572	0.128	0.064	4.19e-268	1	TMEM225B
8.71e-272	0.577215	0.356	0.292	1.62e-267	1	STRN3
2.29e-271	0.575705	0.366	0.299	4.27e-267	1	KIDINS220
7.32e-271	0.544514	0.296	0.216	1.36e-266	1	EPM2AIP1
2.09e-269	0.45339	0.172	0.099	3.88e-265	1	SETBP1
3.08e-269	0.329617	0.134	0.067	5.74e-265	1	ZBTB10
3.7e-269	0.412317	0.64	0.672	6.88e-265	1	ENSOARG00020021129
1.16e-268	0.292061	0.106	0.048	2.17e-264	1	OAT
1.57e-268	0.58715	0.305	0.234	2.92e-264	1	ENSOARG00020013068
3.7e-267	0.562068	0.449	0.416	6.88e-263	1	DNAJC8
2.72e-266	0.556506	0.473	0.455	5.05e-262	1	OSTC
7.96e-266	0.381167	0.158	0.087	1.48e-261	1	RAB8B
8.22e-266	0.585498	0.287	0.213	1.53e-261	1	UBTF
1.15e-265	0.46542	0.222	0.143	2.15e-261	1	ARL13B
1.68e-265	0.483374	0.205	0.129	3.13e-261	1	IGF2BP2
8.94e-262	0.564473	0.314	0.243	1.66e-257	1	NRBP1
1.28e-260	0.400009	0.602	0.619	2.38e-256	1	SNX3
5.49e-260	0.488468	0.207	0.132	1.02e-255	1	MPZL1
5.52e-260	0.462063	0.561	0.576	1.03e-255	1	PFDN2
4.43e-258	0.58261	0.369	0.316	8.25e-254	1	SWI5
5.03e-258	0.391155	0.624	0.648	9.35e-254	1	PARK7
9.09e-258	0.471228	0.22	0.143	1.69e-253	1	SPART
3.98e-255	0.492078	0.265	0.187	7.41e-251	1	SMAD5
1.62e-253	0.253771	0.854	0.855	3.01e-249	1	ENSOARG00020026347
1.65e-252	0.50968	0.517	0.516	3.07e-248	1	ENSOARG00020008821
4.15e-252	0.512911	0.246	0.171	7.72e-248	1	THRA
4.33e-251	0.60188	0.414	0.368	8.05e-247	1	ZC3H13
7.78e-249	0.463965	0.242	0.164	1.45e-244	1	ADD1
5.19e-248	0.319646	0.111	0.053	9.66e-244	1	ENSOARG00020023577
4.63e-247	0.567519	0.443	0.412	8.62e-243	1	ZNF326
3.05e-245	0.538434	0.324	0.259	5.68e-241	1	DESI2
2.18e-242	0.4889	0.536	0.554	4.06e-238	1	DDOST
3.16e-242	0.363285	0.424	0.344	5.87e-238	1	MSN
4.11e-242	0.371091	0.142	0.077	7.65e-238	1	U2.84
5.68e-242	0.337669	0.177	0.103	1.06e-237	1	SMARCD3
3.34e-241	0.482353	0.184	0.113	6.21e-237	1	STAMBPL1
6.02e-241	0.33722	0.144	0.077	1.12e-236	1	ENSOARG00020013102
1.77e-240	0.400534	0.671	0.709	3.3e-236	1	PRRC2C
4.49e-236	0.48063	0.267	0.191	8.35e-232	1	FNBP1L
5.34e-235	0.460097	0.209	0.137	9.93e-231	1	SLC39A6
2.8e-234	0.382224	0.154	0.088	5.22e-230	1	TBC1D12
3.21e-234	0.444617	0.217	0.14	5.97e-230	1	TLN2
5.02e-233	0.264648	0.102	0.048	9.35e-229	1	FKBP14
7.1e-233	0.597363	0.312	0.243	1.32e-228	1	CEBPD
1.18e-230	0.353522	0.124	0.064	2.2e-226	1	ENSOARG00020011887
2.38e-230	0.501966	0.47	0.447	4.43e-226	1	ENSOARG00020021294
3.15e-230	0.557002	0.383	0.339	5.86e-226	1	TERF2IP
3.04e-228	0.500091	0.357	0.292	5.66e-224	1	SERPINH1
2.7e-227	0.316347	0.12	0.062	5.03e-223	1	TRIO
7.12e-224	0.406118	0.606	0.631	1.33e-219	1	ENSOARG00020002907
7.21e-224	0.570115	0.289	0.226	1.34e-219	1	SNRNP200
3.82e-223	0.289553	0.119	0.061	7.11e-219	1	ASRGL1
3.52e-222	0.339559	0.423	0.346	6.55e-218	1	ENSOARG00020001965
1.41e-219	0.49806	0.235	0.166	2.63e-215	1	P3H3
2.18e-219	0.365493	0.147	0.084	4.06e-215	1	MAGED1
6.97e-219	0.339294	0.191	0.117	1.3e-214	1	RBPMS
4.44e-217	0.501593	0.52	0.537	8.27e-213	1	EEF2
8.16e-216	0.468936	0.504	0.484	1.52e-211	1	CCND2
1.1e-215	0.332622	0.123	0.065	2.05e-211	1	TCAF1
1.13e-213	0.508422	0.419	0.385	2.1e-209	1	MTPN
3.19e-213	0.316647	0.24	0.159	5.94e-209	1	NR2F2
6.63e-213	0.503634	0.274	0.208	1.23e-208	1	ENSOARG00020000793
7.4e-212	0.368829	0.259	0.178	1.38e-207	1	ID2
8.53e-212	0.276023	0.107	0.053	1.59e-207	1	NDEL1
1.1e-209	0.455306	0.257	0.188	2.04e-205	1	RCN2
3.05e-208	0.324914	0.659	0.672	5.67e-204	1	PABPC1
2.39e-207	0.522957	0.288	0.224	4.45e-203	1	HNRNPH1
8.35e-206	0.490757	0.216	0.151	1.55e-201	1	P4HB
1.59e-205	0.380381	0.163	0.1	2.96e-201	1	ENSOARG00020023416
2.6e-204	0.269803	0.714	0.765	4.85e-200	1	SKP1
6.82e-204	0.371636	0.158	0.095	1.27e-199	1	CDKN2AIP
1.14e-203	0.330594	0.149	0.087	2.12e-199	1	SPATA6
2.9e-203	0.350396	0.657	0.683	5.4e-199	1	ENSOARG00020002933
1.62e-202	0.549383	0.335	0.281	3.01e-198	1	CCDC186
2.48e-202	0.495345	0.302	0.237	4.62e-198	1	PDS5B
7.16e-201	0.341798	0.133	0.075	1.33e-196	1	GPC3
5.14e-198	0.544223	0.362	0.312	9.57e-194	1	PCF11
1e-197	0.299175	0.116	0.062	1.87e-193	1	HSPA13
1.14e-197	0.551952	0.344	0.296	2.12e-193	1	LUZP1
2.42e-197	0.54401	0.372	0.334	4.51e-193	1	RAB14
1.72e-195	0.424394	0.412	0.366	3.2e-191	1	ENSOARG00020023265
2.45e-194	0.46317	0.519	0.53	4.57e-190	1	SF3B1
1.06e-193	0.514104	0.302	0.241	1.96e-189	1	TAF7
1.22e-193	0.491101	0.243	0.181	2.26e-189	1	ENSOARG00020023190
7.55e-192	0.526478	0.434	0.412	1.41e-187	1	PRPF4B
1.26e-191	0.444396	0.494	0.496	2.34e-187	1	ARL3
5.25e-191	0.309389	0.128	0.072	9.77e-187	1	CD302
1.86e-189	0.467573	0.514	0.524	3.46e-185	1	YWHAE
2.03e-189	0.255412	0.156	0.091	3.78e-185	1	ZEB1
1.47e-188	0.54034	0.308	0.256	2.73e-184	1	COPB2
3.18e-187	0.253243	0.102	0.052	5.92e-183	1	WIPI1
1.13e-186	0.434961	0.445	0.412	2.11e-182	1	ZYX
2.22e-186	0.517775	0.298	0.241	4.14e-182	1	ENSOARG00020017437
1.21e-185	0.276354	0.124	0.068	2.26e-181	1	MICU3
1.94e-185	0.307334	0.254	0.178	3.62e-181	1	PDLIM7
7.1e-184	0.445264	0.281	0.217	1.32e-179	1	KIF2A
3.54e-182	0.500143	0.295	0.238	6.59e-178	1	SEC63
1.56e-181	0.356001	0.17	0.107	2.89e-177	1	TRPS1
2.08e-181	0.386519	0.18	0.118	3.88e-177	1	GOLM2
2.6e-181	0.460103	0.538	0.559	4.84e-177	1	SMC3
9.1e-181	0.297573	0.119	0.066	1.69e-176	1	ZNF711
3.3e-180	0.387756	0.214	0.145	6.13e-176	1	LAMC1
3.44e-179	0.440868	0.187	0.128	6.4e-175	1	ENSOARG00020016182
1.1e-178	0.503312	0.44	0.433	2.05e-174	1	PDAP1
2.04e-177	0.365126	0.613	0.653	3.8e-173	1	RBM39
6.78e-177	0.522944	0.297	0.246	1.26e-172	1	ENSOARG00020008954
2.51e-175	0.345778	0.141	0.085	4.67e-171	1	ZFP36L1
2.55e-175	0.39486	0.407	0.356	4.75e-171	1	TLN1
1.18e-171	0.428137	0.174	0.117	2.2e-167	1	ENSOARG00020023011
2.13e-171	0.355406	0.599	0.651	3.97e-167	1	SF3B6
3.27e-171	0.360361	0.172	0.112	6.08e-167	1	TCEA2
3.46e-171	0.41539	0.221	0.159	6.44e-167	1	G3BP2
3.79e-170	0.352216	0.123	0.071	7.05e-166	1	DSEL
5.67e-170	0.343771	0.132	0.078	1.06e-165	1	PSD3
6.99e-169	0.495258	0.32	0.269	1.3e-164	1	TUT4
1.91e-168	0.334459	0.113	0.064	3.56e-164	1	STAM
2.36e-168	0.487284	0.419	0.405	4.39e-164	1	LRPAP1
3.34e-168	0.334406	0.125	0.073	6.21e-164	1	CCDC171
3.02e-167	0.441179	0.21	0.149	5.61e-163	1	FAT1
1.03e-166	0.301728	0.12	0.069	1.91e-162	1	CALU
1.06e-165	0.454894	0.49	0.485	1.97e-161	1	RBBP6
7.12e-165	0.265492	0.676	0.724	1.33e-160	1	SAP18
7.12e-164	0.446733	0.497	0.525	1.32e-159	1	CHID1
6.57e-163	0.419388	0.198	0.139	1.22e-158	1	DOCK7
1.46e-161	0.482334	0.509	0.526	2.72e-157	1	ATP2B1
3.39e-160	0.513805	0.429	0.414	6.31e-156	1	ENSOARG00020004266
3.82e-160	0.499827	0.381	0.359	7.11e-156	1	RALA
4.14e-160	0.348764	0.174	0.116	7.7e-156	1	SDCBP
5.67e-160	0.46104	0.291	0.238	1.05e-155	1	ACAP2
1.04e-157	0.496752	0.433	0.436	1.94e-153	1	BCL7C
1.66e-156	0.379152	0.563	0.609	3.1e-152	1	FIS1
1.29e-155	0.366837	0.609	0.648	2.4e-151	1	PNN
2.61e-155	0.309337	0.115	0.067	4.85e-151	1	SAV1
3.58e-152	0.473242	0.232	0.18	6.66e-148	1	PAGR1
2.06e-151	0.395432	0.523	0.559	3.84e-147	1	TMEM14C
3.53e-151	0.395341	0.165	0.112	6.57e-147	1	CCDC117
4.79e-151	0.51712	0.367	0.342	8.91e-147	1	KHDRBS1
6.61e-151	0.464961	0.441	0.444	1.23e-146	1	DDX24
2.49e-150	0.418333	0.204	0.148	4.63e-146	1	SVIL
6.71e-150	0.368662	0.156	0.104	1.25e-145	1	RAB34
7.22e-147	0.467479	0.253	0.201	1.34e-142	1	TMF1
2.16e-145	0.317274	0.125	0.076	4.01e-141	1	C12orf75
2.39e-144	0.558253	0.348	0.317	4.45e-140	1	BAZ2B
5.34e-144	0.308556	0.141	0.09	9.94e-140	1	RSU1
8.85e-144	0.356001	0.166	0.113	1.65e-139	1	PLEKHA3
1.2e-143	0.35949	0.608	0.661	2.24e-139	1	ENSOARG00020025630
4.48e-142	0.395577	0.179	0.126	8.34e-138	1	CSNK1G3
1.01e-140	0.433492	0.311	0.264	1.89e-136	1	CD81
3.42e-140	0.32563	0.138	0.088	6.37e-136	1	APAF1
4.81e-140	0.508621	0.361	0.336	8.95e-136	1	PTPN11
1.14e-139	0.42087	0.501	0.531	2.13e-135	1	PRKAR1A
2.65e-139	0.506704	0.289	0.249	4.93e-135	1	TRIP6
6.67e-139	0.511506	0.303	0.261	1.24e-134	1	REV3L
6.75e-139	0.309009	0.132	0.083	1.26e-134	1	FZD2
9.66e-139	0.379229	0.164	0.113	1.8e-134	1	CIRBP
1.02e-138	0.446049	0.202	0.151	1.89e-134	1	GNG12
5.07e-138	0.331585	0.142	0.091	9.44e-134	1	PLCXD2
1.25e-137	0.443058	0.312	0.268	2.32e-133	1	CBX5
1.03e-136	0.542953	0.343	0.32	1.92e-132	1	MEIS1
3.87e-135	0.40158	0.575	0.623	7.21e-131	1	RBM25
6.2e-135	0.375973	0.178	0.126	1.15e-130	1	ZNF428
3.26e-134	0.436828	0.475	0.497	6.07e-130	1	TRIM28
1.05e-132	0.350708	0.162	0.112	1.96e-128	1	SEC31A
1.56e-132	0.287962	0.114	0.069	2.9e-128	1	CHIC2
1.68e-132	0.399883	0.526	0.569	3.12e-128	1	RNASEK
1.12e-131	0.327483	0.123	0.078	2.08e-127	1	ENSOARG00020004835
2.59e-131	0.439246	0.209	0.159	4.81e-127	1	PAIP2
1.18e-129	0.370294	0.166	0.116	2.2e-125	1	ENSOARG00020001756
2.61e-129	0.3247	0.133	0.086	4.85e-125	1	GABARAP
9.28e-129	0.434098	0.448	0.442	1.73e-124	1	ENSOARG00020018957
3.14e-128	0.457321	0.381	0.367	5.85e-124	1	DRAP1
3.18e-128	0.323914	0.134	0.087	5.92e-124	1	CAMKK2
4.56e-128	0.477168	0.511	0.553	8.49e-124	1	EIF5B
6.33e-128	0.482874	0.315	0.283	1.18e-123	1	WASF2
1.05e-127	0.360073	0.187	0.134	1.95e-123	1	ACTN1
1.2e-127	0.274471	0.114	0.07	2.23e-123	1	SRGAP1
1.45e-127	0.589189	0.304	0.278	2.7e-123	1	PITX1
8.79e-127	0.309241	0.149	0.099	1.64e-122	1	SCARB2
3.31e-126	0.494581	0.358	0.343	6.16e-122	1	MESD
2.84e-125	0.37212	0.158	0.11	5.28e-121	1	EPB41
8.71e-125	0.441013	0.234	0.188	1.62e-120	1	KDM1A
1.46e-124	0.484365	0.355	0.331	2.71e-120	1	TOP2B
4.56e-124	0.50181	0.356	0.336	8.49e-120	1	SUPT16H
1.17e-122	0.295031	0.158	0.107	2.19e-118	1	CCN1
1.43e-122	0.453122	0.377	0.36	2.67e-118	1	HP1BP3
4.94e-122	0.406114	0.151	0.105	9.18e-118	1	WLS
1.36e-120	0.332867	0.134	0.089	2.54e-116	1	ENSOARG00020009005
1.73e-120	0.278483	0.125	0.081	3.21e-116	1	MTSS1
3.27e-120	0.346869	0.157	0.11	6.08e-116	1	PJA2
8.05e-120	0.409728	0.219	0.171	1.5e-115	1	RBM23
8.99e-120	0.258032	0.699	0.742	1.67e-115	1	ENSOARG00020011522
1.52e-119	0.437431	0.203	0.156	2.83e-115	1	NFKBIB
4.81e-119	0.478816	0.381	0.375	8.95e-115	1	SMARCE1
2.39e-118	0.456534	0.42	0.423	4.44e-114	1	DHX36
8.66e-118	0.424958	0.199	0.153	1.61e-113	1	CCNG1
6.52e-116	0.461818	0.268	0.229	1.21e-111	1	ARCN1
9.17e-116	0.366565	0.508	0.539	1.71e-111	1	YWHAB
1.05e-115	0.433896	0.211	0.166	1.95e-111	1	THAP12
1.23e-115	0.34623	0.343	0.3	2.28e-111	1	ENSOARG00020024147
1.4e-115	0.5067	0.36	0.354	2.61e-111	1	CDC26
1.5e-115	0.42078	0.295	0.258	2.8e-111	1	HEBP1
1.94e-115	0.36219	0.517	0.565	3.61e-111	1	CHCHD1
3.31e-114	0.435317	0.204	0.16	6.16e-110	1	PDCD7
6.56e-114	0.326137	0.157	0.11	1.22e-109	1	ROBO2
1.78e-113	0.570127	0.241	0.203	3.31e-109	1	CNTRL
8.78e-113	0.378016	0.357	0.328	1.63e-108	1	GABARAPL1
1.58e-112	0.381882	0.166	0.12	2.93e-108	1	LRIG1
1.58e-112	0.431751	0.427	0.429	2.94e-108	1	PDIA3
5.44e-112	0.446951	0.242	0.2	1.01e-107	1	SRSF3
9.96e-112	0.481111	0.33	0.307	1.85e-107	1	TRA2B
1.78e-111	0.310545	0.591	0.653	3.31e-107	1	SEC62
6.51e-111	0.412276	0.226	0.183	1.21e-106	1	TCF7L2
4e-110	0.481889	0.306	0.274	7.44e-106	1	ENSOARG00020009065
5.35e-110	0.454545	0.248	0.208	9.95e-106	1	RERE
1.74e-109	0.268022	0.109	0.069	3.24e-105	1	ZNF628
8.78e-109	0.391708	0.458	0.479	1.63e-104	1	ISCU
1.1e-108	0.443411	0.198	0.155	2.04e-104	1	SUPT6H
1.82e-108	0.418241	0.242	0.2	3.38e-104	1	PKN2
2.46e-108	0.362904	0.171	0.126	4.58e-104	1	WDR82
9.6e-108	0.339678	0.164	0.119	1.79e-103	1	CBX3
1.08e-107	0.377028	0.176	0.132	2.01e-103	1	LZIC
3.23e-107	0.340054	0.177	0.132	6e-103	1	ENSOARG00020012895
3.9e-107	0.422433	0.283	0.248	7.25e-103	1	ATOX1
3.91e-107	0.34186	0.559	0.615	7.27e-103	1	CCT8
4.01e-107	0.345163	0.173	0.128	7.46e-103	1	DOK5
1.93e-106	0.470916	0.378	0.374	3.59e-102	1	ENSOARG00020002318
3.33e-106	0.383493	0.172	0.128	6.2e-102	1	TSPYL1
3.8e-106	0.284598	0.126	0.083	7.07e-102	1	NIN
9.3e-106	0.346661	0.165	0.121	1.73e-101	1	POGLUT2
9.61e-105	0.350752	0.19	0.145	1.79e-100	1	CIB2
1.07e-104	0.289355	0.112	0.073	2e-100	1	ENSOARG00020006237
5.44e-104	0.351673	0.167	0.124	1.01e-99	1	RHOD
1.68e-103	0.345258	0.148	0.106	3.13e-99	1	CD164
1.25e-102	0.284683	0.117	0.077	2.33e-98	1	TSPAN3
1.46e-101	0.465234	0.371	0.373	2.71e-97	1	PHAX
9.59e-100	0.297888	0.296	0.251	1.78e-95	1	PLPP3
1.14e-99	0.366411	0.183	0.139	2.13e-95	1	NF1
2.04e-99	0.444404	0.331	0.312	3.8e-95	1	HDLBP
3.75e-99	0.300107	0.123	0.083	6.98e-95	1	FOXP2
5.58e-99	0.417902	0.263	0.227	1.04e-94	1	EPC1
7.1e-99	0.25074	0.102	0.065	1.32e-94	1	CTSF
1.14e-98	0.432393	0.24	0.203	2.12e-94	1	GNAI3
2.2e-98	0.411455	0.242	0.204	4.1e-94	1	PDIA6
6.26e-98	0.307145	0.2	0.155	1.17e-93	1	COQ10B
8.28e-97	0.254974	0.109	0.071	1.54e-92	1	MLF1
1.03e-96	0.296714	0.124	0.085	1.92e-92	1	CEP112
1.08e-96	0.383032	0.175	0.134	2.01e-92	1	ENSOARG00020021844
8.94e-96	0.421778	0.477	0.52	1.66e-91	1	THRAP3
2.83e-95	0.442479	0.301	0.277	5.26e-91	1	DNAJC3
3.9e-95	0.321508	0.23	0.183	7.25e-91	1	COX7A1
4.92e-95	0.330274	0.138	0.098	9.15e-91	1	CCDC112
4.94e-95	0.380027	0.181	0.14	9.19e-91	1	FNDC3A
1.13e-94	0.386689	0.165	0.126	2.1e-90	1	RYK
1.08e-92	0.451277	0.413	0.435	2.02e-88	1	C11orf58
1.36e-92	0.293128	0.116	0.077	2.53e-88	1	PDE4D
4.15e-91	0.267061	0.103	0.067	7.73e-87	1	EIF4H
6.22e-89	0.329882	0.13	0.092	1.16e-84	1	BLVRA
2.37e-88	0.276643	0.106	0.071	4.41e-84	1	NUMA1
3.67e-88	0.381714	0.176	0.138	6.84e-84	1	BTBD1
7.67e-88	0.393762	0.215	0.178	1.43e-83	1	PPIL4
2.09e-87	0.438811	0.273	0.246	3.89e-83	1	CETN2
4.59e-87	0.440181	0.497	0.543	8.55e-83	1	SIVA1
1.49e-86	0.448849	0.267	0.238	2.77e-82	1	TTC3
4.89e-86	0.419375	0.308	0.287	9.1e-82	1	BTG3
5.69e-86	0.362359	0.173	0.134	1.06e-81	1	SEL1L
6.91e-86	0.317934	0.161	0.121	1.29e-81	1	GLS
1.06e-85	0.441999	0.417	0.445	1.98e-81	1	LSM8
1.8e-84	0.409001	0.297	0.273	3.35e-80	1	TMPO
3.42e-84	0.380698	0.188	0.151	6.37e-80	1	ENSOARG00020008682
3.89e-84	0.258075	0.126	0.088	7.23e-80	1	AKIRIN2
1.25e-83	0.412413	0.384	0.391	2.33e-79	1	RHEB
2.02e-83	0.397592	0.21	0.176	3.76e-79	1	MBTPS1
2.08e-83	0.375571	0.155	0.116	3.87e-79	1	H1F0
4.3e-83	0.356948	0.2	0.162	8.01e-79	1	ENSOARG00020009137
1.59e-82	0.283486	0.126	0.09	2.97e-78	1	NCOA1
2.69e-82	0.360013	0.414	0.426	5e-78	1	ALYREF
4.67e-82	0.312277	0.137	0.1	8.68e-78	1	ENSOARG00020021235
1.41e-81	0.296869	0.154	0.114	2.62e-77	1	CDC42BPA
2.73e-81	0.334546	0.18	0.142	5.09e-77	1	AFF4
9.54e-81	0.304384	0.131	0.095	1.78e-76	1	PBX1
1.3e-80	0.432234	0.276	0.254	2.41e-76	1	APPL1
1.32e-80	0.266156	0.112	0.077	2.45e-76	1	NUCB1
3.87e-79	0.331695	0.469	0.49	7.2e-75	1	SFPQ
9.08e-79	0.437963	0.332	0.321	1.69e-74	1	ENSOARG00020004698
1.33e-78	0.414488	0.203	0.17	2.48e-74	1	RNF169
1.43e-78	0.264472	0.111	0.077	2.67e-74	1	OBSL1
3.31e-78	0.359279	0.183	0.148	6.16e-74	1	SDF2
7.74e-78	0.403134	0.405	0.423	1.44e-73	1	RAB2A
1.22e-77	0.369516	0.189	0.154	2.27e-73	1	TP53BP1
2.15e-77	0.323323	0.167	0.131	4.01e-73	1	IFT43
4.43e-77	0.258382	0.119	0.084	8.24e-73	1	WWC2
7.01e-77	0.343053	0.508	0.557	1.3e-72	1	FUS
9.29e-77	0.292002	0.135	0.099	1.73e-72	1	ENSOARG00020008425
1.14e-76	0.313474	0.142	0.106	2.11e-72	1	DDX31
2.41e-76	0.363957	0.201	0.168	4.49e-72	1	PITPNB
2.91e-76	0.415892	0.236	0.206	5.41e-72	1	SMARCC2
4.22e-76	0.4652	0.308	0.297	7.86e-72	1	VIRMA
1.25e-75	0.27721	0.12	0.086	2.33e-71	1	FBXO11
3.5e-74	0.332211	0.226	0.19	6.52e-70	1	CCPG1
6.35e-74	0.417055	0.252	0.228	1.18e-69	1	CLINT1
8.3e-74	0.337916	0.371	0.361	1.54e-69	1	MACF1
1.11e-73	0.254595	0.101	0.068	2.07e-69	1	ARRDC3
3.54e-73	0.469164	0.333	0.328	6.58e-69	1	FAM133B
4.96e-73	0.355233	0.278	0.246	9.22e-69	1	LAMB1
5.34e-73	0.468405	0.421	0.449	9.94e-69	1	ENSOARG00020023457
2.69e-72	0.32767	0.231	0.197	5e-68	1	RNF130
2.8e-72	0.375372	0.535	0.594	5.22e-68	1	ENSOARG00020013209
7.02e-72	0.44991	0.39	0.403	1.31e-67	1	SMC1A
1.03e-71	0.418821	0.471	0.523	1.92e-67	1	PPIG
1.3e-71	0.277025	0.102	0.071	2.41e-67	1	ENSOARG00020013833
2.13e-71	0.370506	0.196	0.163	3.96e-67	1	SRSF6
5.38e-71	0.421639	0.389	0.4	1e-66	1	ASH1L
6.33e-71	0.263466	0.107	0.076	1.18e-66	1	ZFP36
1.07e-70	0.419157	0.303	0.292	1.99e-66	1	ILKAP
2.02e-70	0.399382	0.238	0.213	3.76e-66	1	RAB21
8.13e-70	0.274362	0.146	0.111	1.51e-65	1	QKI
8.47e-70	0.30617	0.151	0.117	1.58e-65	1	ING2
1.08e-69	0.429817	0.413	0.439	2.01e-65	1	RSF1
2.6e-69	0.310191	0.143	0.11	4.84e-65	1	EPC2
5.52e-69	0.32447	0.157	0.123	1.03e-64	1	B3GLCT
1.06e-67	0.427574	0.325	0.327	1.97e-63	1	KRR1
4.17e-67	0.466674	0.268	0.253	7.76e-63	1	ACSL3
4.64e-67	0.280844	0.159	0.124	8.64e-63	1	ENSOARG00020014447
4.64e-67	0.282587	0.14	0.106	8.64e-63	1	ARHGAP42
5.37e-67	0.445232	0.341	0.345	1e-62	1	ETAA1
6.36e-67	0.389155	0.208	0.178	1.18e-62	1	RBM5
1.3e-66	0.408104	0.329	0.322	2.42e-62	1	FNBP4
4.64e-66	0.403057	0.258	0.238	8.62e-62	1	DUSP12
3.29e-65	0.287773	0.569	0.631	6.12e-61	1	LSM7
3.16e-64	0.26184	0.113	0.082	5.89e-60	1	FBXO30
3.41e-64	0.261389	0.559	0.622	6.34e-60	1	GPX4
4.09e-64	0.426993	0.366	0.38	7.61e-60	1	ENSOARG00020001921
1.23e-63	0.348362	0.466	0.518	2.3e-59	1	SARNP
1.8e-63	0.403728	0.365	0.375	3.35e-59	1	LIMA1
5.31e-63	0.30057	0.117	0.086	9.87e-59	1	PPM1B
5.36e-63	0.326403	0.422	0.433	9.97e-59	1	SSBP4
2.84e-62	0.262282	0.126	0.095	5.28e-58	1	SNX21
3.81e-62	0.426594	0.283	0.272	7.1e-58	1	DNAJA2
4.8e-62	0.47527	0.3	0.295	8.92e-58	1	EEA1
2.26e-61	0.415333	0.394	0.414	4.2e-57	1	ENSOARG00020005773
2.65e-61	0.426978	0.373	0.393	4.93e-57	1	SNW1
3.33e-61	0.309583	0.415	0.42	6.2e-57	1	JMJD1C
4.4e-61	0.33999	0.498	0.555	8.19e-57	1	KMT2E
9.76e-61	0.442873	0.344	0.357	1.82e-56	1	ZNF24
1.06e-60	0.426077	0.296	0.292	1.97e-56	1	COMMD1
3.26e-60	0.385042	0.449	0.498	6.08e-56	1	DDX46
3.56e-60	0.286968	0.54	0.61	6.62e-56	1	ENSOARG00020005608
8.9e-60	0.309773	0.147	0.116	1.66e-55	1	C3orf38
1.18e-59	0.283327	0.178	0.145	2.2e-55	1	STX2
1.19e-59	0.378273	0.223	0.198	2.21e-55	1	TMEM131L
4.08e-59	0.377432	0.198	0.172	7.59e-55	1	HSD17B4
1.1e-58	0.315906	0.179	0.149	2.05e-54	1	PGM3
1.13e-58	0.253545	0.101	0.073	2.1e-54	1	HNRNPUL1
3.98e-58	0.39265	0.248	0.229	7.4e-54	1	FLOT1
5.43e-58	0.410417	0.312	0.311	1.01e-53	1	SDF4
3.17e-57	0.429994	0.311	0.313	5.89e-53	1	LSM2
4.73e-57	0.427443	0.3	0.294	8.79e-53	1	MSH6
5.54e-57	0.367271	0.177	0.149	1.03e-52	1	BPNT2
2.44e-56	0.335819	0.158	0.129	4.53e-52	1	DDX6
3.77e-56	0.394647	0.403	0.435	7.02e-52	1	YY1
5.24e-56	0.295291	0.132	0.103	9.76e-52	1	CASC3
5.82e-56	0.369325	0.287	0.273	1.08e-51	1	SH3GLB1
1.22e-55	0.292504	0.132	0.104	2.27e-51	1	STAT1
1.69e-55	0.398307	0.236	0.217	3.15e-51	1	CHD6
2.78e-55	0.390006	0.244	0.226	5.17e-51	1	HOOK3
3.75e-55	0.348192	0.195	0.169	6.97e-51	1	PCBD1
4.07e-55	0.345211	0.191	0.164	7.58e-51	1	PRPF39
5.88e-55	0.323602	0.143	0.115	1.09e-50	1	ENSOARG00020019013
6.55e-55	0.276132	0.151	0.12	1.22e-50	1	KIF1B
8.44e-55	0.345608	0.182	0.155	1.57e-50	1	RHOA
1.82e-54	0.407661	0.475	0.539	3.39e-50	1	EIF3A
3.03e-54	0.378222	0.337	0.342	5.63e-50	1	IFNGR2
3.3e-54	0.435079	0.286	0.283	6.15e-50	1	KLHDC2
3.67e-54	0.377845	0.379	0.4	6.83e-50	1	PPP1CC
7.23e-54	0.383674	0.316	0.31	1.34e-49	1	ROCK2
1.82e-53	0.284742	0.143	0.115	3.39e-49	1	TFG
2.67e-53	0.313858	0.526	0.594	4.96e-49	1	RSRC2
2.66e-52	0.371059	0.202	0.178	4.94e-48	1	RABEP1
3e-52	0.285836	0.132	0.104	5.57e-48	1	DYNC2LI1
3.67e-52	0.332225	0.179	0.152	6.83e-48	1	CSPP1
4.94e-52	0.344364	0.193	0.168	9.2e-48	1	CREBBP
2.07e-51	0.300546	0.181	0.152	3.85e-47	1	ATAD2
9.15e-51	0.40399	0.206	0.185	1.7e-46	1	CTNNB1
9.54e-51	0.409624	0.326	0.331	1.78e-46	1	USP34
2.09e-50	0.397877	0.383	0.414	3.89e-46	1	CFDP1
3.16e-50	0.27891	0.13	0.102	5.88e-46	1	TP53BP2
4.42e-50	0.407778	0.326	0.332	8.22e-46	1	ENSOARG00020018830
1.26e-49	0.349939	0.281	0.269	2.35e-45	1	ENSOARG00020015864
2.87e-49	0.309839	0.127	0.1	5.34e-45	1	ENSOARG00020015455
7.36e-49	0.35015	0.183	0.159	1.37e-44	1	VPS13B
2.57e-48	0.37048	0.435	0.481	4.79e-44	1	CHD9
7.62e-48	0.34863	0.42	0.465	1.42e-43	1	DYNLT1
1.05e-47	0.282179	0.132	0.105	1.96e-43	1	STAG1
2.13e-47	0.401835	0.233	0.218	3.96e-43	1	CUX1
2.82e-47	0.391163	0.381	0.41	5.26e-43	1	TSPAN31
3.35e-47	0.329094	0.185	0.16	6.24e-43	1	TMEM131
3.53e-47	0.408288	0.244	0.233	6.57e-43	1	PPP4R2
3.64e-47	0.38574	0.298	0.298	6.78e-43	1	CCS
5.29e-47	0.43215	0.297	0.303	9.85e-43	1	PSMD13
7.06e-47	0.338803	0.153	0.129	1.31e-42	1	tgif1
1.81e-46	0.35211	0.193	0.17	3.37e-42	1	EHBP1
2.25e-46	0.390364	0.251	0.239	4.19e-42	1	MFAP1
4.76e-46	0.289343	0.164	0.138	8.86e-42	1	FEZ2
1.05e-45	0.299371	0.154	0.128	1.95e-41	1	MYO9A
3.91e-45	0.258312	0.134	0.108	7.28e-41	1	MOSMO
5.06e-45	0.40126	0.265	0.258	9.41e-41	1	AGFG1
9.71e-45	0.405789	0.267	0.261	1.81e-40	1	ENSOARG00020014026
1.54e-44	0.370401	0.376	0.395	2.87e-40	1	ZNF292
3.57e-44	0.327528	0.286	0.275	6.63e-40	1	IL6ST
6.95e-44	0.264136	0.257	0.234	1.29e-39	1	SOX4
1.24e-43	0.367141	0.427	0.48	2.31e-39	1	SF3B2
3.73e-43	0.375172	0.207	0.188	6.95e-39	1	RPAP3
1.37e-42	0.412743	0.359	0.379	2.55e-38	1	CHD4
2.33e-42	0.335005	0.198	0.179	4.33e-38	1	ENSOARG00020008440
2.59e-42	0.290908	0.188	0.165	4.82e-38	1	RAP1B
3e-42	0.294583	0.467	0.529	5.58e-38	1	RNH1
3.05e-42	0.289104	0.522	0.607	5.68e-38	1	R3HDM1
5.59e-42	0.405002	0.248	0.24	1.04e-37	1	CAPRIN1
9.98e-42	0.303469	0.185	0.163	1.86e-37	1	SNX9
6.01e-41	0.294721	0.153	0.13	1.12e-36	1	PHKG2
1.7e-40	0.377993	0.29	0.291	3.16e-36	1	DHX9
1.88e-40	0.334025	0.17	0.148	3.5e-36	1	KMT5B
2.83e-40	0.261379	0.118	0.095	5.26e-36	1	ENSOARG00020009102
3.27e-40	0.376307	0.298	0.303	6.08e-36	1	DYNC1I2
3.62e-40	0.352817	0.424	0.477	6.73e-36	1	ENSOARG00020005536
3.98e-40	0.540422	0.224	0.207	7.41e-36	1	CXCL14
1.77e-39	0.374729	0.41	0.456	3.29e-35	1	ARHGAP5
2.22e-39	0.274537	0.507	0.582	4.13e-35	1	EIF1AX
2.53e-39	0.256844	0.13	0.107	4.7e-35	1	SNX7
2.57e-39	0.326617	0.178	0.157	4.78e-35	1	PRRC2B
4e-39	0.366436	0.33	0.345	7.44e-35	1	DNAJC1
4.06e-39	0.32054	0.141	0.119	7.56e-35	1	GPCPD1
5.72e-39	0.390866	0.285	0.291	1.06e-34	1	UBFD1
8.25e-39	0.254281	0.557	0.642	1.54e-34	1	ROMO1
1.17e-38	0.308554	0.157	0.135	2.18e-34	1	SP3
1.23e-38	0.343112	0.253	0.243	2.28e-34	1	ENSOARG00020006136
2.07e-38	0.322263	0.164	0.144	3.86e-34	1	TDRD3
2.86e-38	0.408763	0.26	0.258	5.33e-34	1	CCDC59
3.95e-38	0.382262	0.379	0.411	7.36e-34	1	BCLAF1
1.07e-36	0.253542	0.121	0.098	1.98e-32	1	FAH
1.12e-36	0.327879	0.169	0.15	2.09e-32	1	CGGBP1
6.56e-36	0.275198	0.347	0.355	1.22e-31	1	DEGS1
1.12e-35	0.406424	0.323	0.341	2.08e-31	1	GLRX5
1.6e-35	0.358881	0.207	0.193	2.97e-31	1	NRDC
2.34e-35	0.365876	0.354	0.381	4.35e-31	1	RNF10
6.01e-35	0.301061	0.146	0.126	1.12e-30	1	ZNF830
1.49e-34	0.339792	0.218	0.205	2.77e-30	1	STAG2
1.54e-34	0.333575	0.392	0.437	2.87e-30	1	ENSOARG00020024153
3.68e-34	0.353378	0.267	0.266	6.84e-30	1	SDE2
6.89e-34	0.277464	0.137	0.116	1.28e-29	1	MARK3
7.05e-34	0.309691	0.172	0.154	1.31e-29	1	SIRT1
1.05e-33	0.391351	0.275	0.277	1.95e-29	1	REST
1.2e-33	0.319539	0.241	0.231	2.23e-29	1	ELF2
2.06e-33	0.354463	0.251	0.248	3.84e-29	1	NCK1
2.16e-33	0.317592	0.187	0.171	4.02e-29	1	UBN1
8.85e-33	0.394262	0.259	0.26	1.65e-28	1	TOX4
1.01e-32	0.340094	0.18	0.166	1.87e-28	1	PDZD11
1.06e-32	0.266681	0.113	0.094	1.98e-28	1	LONRF1
1.53e-32	0.336843	0.223	0.214	2.84e-28	1	HDGFL2
1.71e-32	0.422207	0.307	0.32	3.18e-28	1	TRIP11
2.11e-32	0.315573	0.197	0.182	3.92e-28	1	ZNF580
2.16e-32	0.360708	0.314	0.325	4.02e-28	1	ENSOARG00020013817
3.63e-32	0.291008	0.108	0.089	6.76e-28	1	GNAI1
5.58e-32	0.34938	0.349	0.377	1.04e-27	1	GNG5
6.65e-32	0.353911	0.264	0.263	1.24e-27	1	FMR1
7.04e-32	0.314007	0.182	0.166	1.31e-27	1	GLT8D1
7.88e-32	0.336457	0.2	0.187	1.47e-27	1	RASA1
1.44e-31	0.316571	0.187	0.173	2.68e-27	1	LRRFIP2
2.04e-31	0.254784	0.12	0.1	3.8e-27	1	RXYLT1
2.8e-31	0.327888	0.204	0.192	5.22e-27	1	PLD3
5.46e-31	0.380846	0.319	0.343	1.02e-26	1	WASL
5.62e-31	0.25252	0.138	0.117	1.04e-26	1	TRIM24
1.4e-30	0.38155	0.259	0.26	2.61e-26	1	ZFR
2e-30	0.323136	0.159	0.143	3.72e-26	1	DNAJB12
2.43e-30	0.36436	0.312	0.327	4.52e-26	1	DNAJC10
2.58e-30	0.364829	0.379	0.422	4.81e-26	1	METAP2
3.19e-30	0.396307	0.261	0.258	5.94e-26	1	ENSOARG00020001988
8.49e-30	0.348714	0.311	0.325	1.58e-25	1	VKORC1
8.95e-30	0.359994	0.231	0.227	1.66e-25	1	IFT20
2.06e-29	0.271101	0.158	0.138	3.84e-25	1	VCL
5.12e-29	0.375185	0.272	0.277	9.54e-25	1	ZC3H11A
6.8e-29	0.33907	0.216	0.208	1.27e-24	1	RAB1A
7.71e-29	0.323269	0.167	0.152	1.43e-24	1	VEGFB
8.36e-29	0.377848	0.259	0.263	1.56e-24	1	PRMT1
2.91e-28	0.337759	0.388	0.437	5.42e-24	1	LSM5
5.98e-28	0.271785	0.15	0.132	1.11e-23	1	DYNC1LI2
1.9e-27	0.365865	0.34	0.371	3.53e-23	1	SRRT
1.98e-27	0.375161	0.219	0.214	3.69e-23	1	NUFIP1
6.09e-27	0.269321	0.136	0.119	1.13e-22	1	ZMYM4
7.02e-27	0.347939	0.366	0.402	1.31e-22	1	ARHGAP10
2.33e-26	0.264539	0.108	0.091	4.33e-22	1	PTPRK
3.04e-26	0.306311	0.37	0.397	5.66e-22	1	CLK1
3.26e-26	0.392961	0.296	0.313	6.06e-22	1	LRRCC1
4.6e-26	0.301846	0.206	0.196	8.56e-22	1	SMARCD1
5.4e-26	0.289245	0.183	0.17	1.01e-21	1	ATP23
9.05e-26	0.330127	0.198	0.19	1.68e-21	1	CFAP97
1.33e-25	0.357168	0.214	0.21	2.48e-21	1	DDX42
1.54e-25	0.344955	0.339	0.363	2.87e-21	1	ZNF644
4.02e-25	0.380744	0.284	0.297	7.49e-21	1	ENSOARG00020002678
4.06e-25	0.335757	0.24	0.24	7.56e-21	1	METTL9
1.06e-24	0.256412	0.132	0.116	1.98e-20	1	ATE1
1.78e-24	0.269182	0.149	0.133	3.31e-20	1	KIAA1109
2.18e-24	0.369445	0.262	0.27	4.05e-20	1	RBM27
2.6e-24	0.331127	0.179	0.168	4.85e-20	1	ENSOARG00020016428
2.94e-24	0.263261	0.164	0.149	5.46e-20	1	UTP6
2.95e-24	0.260894	0.499	0.587	5.48e-20	1	ENY2
3.54e-24	0.261684	0.144	0.129	6.58e-20	1	ENSOARG00020019393
4.99e-24	0.28034	0.131	0.116	9.29e-20	1	LRRC42
7.28e-24	0.311105	0.182	0.172	1.36e-19	1	SAR1A
7.59e-24	0.252191	0.121	0.106	1.41e-19	1	LENG1
1.61e-23	0.316864	0.402	0.466	3e-19	1	MRPL27
3.78e-23	0.337886	0.277	0.288	7.04e-19	1	TMED4
1.92e-22	0.372582	0.32	0.347	3.58e-18	1	ACIN1
2.71e-22	0.330243	0.397	0.456	5.04e-18	1	PSENEN
3.25e-22	0.255201	0.116	0.101	6.05e-18	1	CDC7
3.5e-22	0.353885	0.217	0.216	6.51e-18	1	TFAM
3.56e-22	0.389589	0.255	0.267	6.63e-18	1	ENSOARG00020013562
5.57e-22	0.361252	0.262	0.272	1.04e-17	1	STAU1
6.34e-22	0.357869	0.305	0.329	1.18e-17	1	RBM4
9.52e-22	0.33144	0.337	0.369	1.77e-17	1	ATP6V1G1
1.8e-21	0.325614	0.196	0.189	3.35e-17	1	ENSOARG00020021145
2.09e-21	0.263178	0.134	0.12	3.89e-17	1	MSH2
2.97e-21	0.272592	0.361	0.393	5.52e-17	1	AZIN1
3.07e-21	0.273897	0.145	0.132	5.72e-17	1	SPRED1
3.14e-21	0.293159	0.259	0.262	5.84e-17	1	SRPRA
3.77e-21	0.300265	0.173	0.163	7.01e-17	1	RBBP7
3.95e-21	0.358495	0.233	0.237	7.36e-17	1	CTNNBL1
7.48e-21	0.274855	0.145	0.132	1.39e-16	1	GRSF1
8.8e-21	0.25846	0.463	0.531	1.64e-16	1	ENSOARG00020015039
4.56e-20	0.291825	0.179	0.17	8.49e-16	1	ENSOARG00020012303
6.33e-20	0.372867	0.248	0.258	1.18e-15	1	GALNT1
6.64e-20	0.318972	0.155	0.146	1.24e-15	1	ACO1
8.35e-20	0.321869	0.38	0.425	1.55e-15	1	SENP6
1.85e-19	0.286937	0.214	0.21	3.45e-15	1	YWHAG
2.03e-19	0.342676	0.253	0.258	3.78e-15	1	APC
2.83e-19	0.296836	0.422	0.493	5.26e-15	1	PSMC1
5.79e-19	0.279354	0.152	0.142	1.08e-14	1	ING4
5.96e-19	0.31041	0.193	0.188	1.11e-14	1	EXOC5
6.76e-19	0.34333	0.376	0.431	1.26e-14	1	OCIAD1
7.45e-19	0.295149	0.216	0.213	1.39e-14	1	SNRPN
1.14e-18	0.282928	0.165	0.155	2.13e-14	1	IFT57
1.37e-18	0.259911	0.129	0.116	2.56e-14	1	TAOK1
1.41e-18	0.277658	0.171	0.163	2.63e-14	1	KIAA2026
1.72e-18	0.253868	0.184	0.174	3.2e-14	1	NUCB2
1.86e-18	0.340359	0.375	0.433	3.46e-14	1	NME3
2.73e-18	0.2572	0.155	0.144	5.07e-14	1	SESTD1
2.85e-18	0.311951	0.377	0.429	5.31e-14	1	ENSOARG00020017583
2.87e-18	0.296479	0.169	0.162	5.35e-14	1	C14H16orf87
4.54e-18	0.34179	0.36	0.406	8.44e-14	1	NSD3
5.76e-18	0.322014	0.312	0.334	1.07e-13	1	CHD1
6.95e-18	0.322745	0.176	0.17	1.29e-13	1	ARF1.1
9.82e-18	0.26475	0.122	0.11	1.83e-13	1	ITGAV
1e-17	0.355134	0.282	0.303	1.87e-13	1	CUL3
1.77e-17	0.267006	0.129	0.118	3.29e-13	1	NCBP3
1.93e-17	0.29616	0.175	0.169	3.59e-13	1	XRCC1
2.65e-17	0.356238	0.325	0.362	4.94e-13	1	COPB1
4.38e-17	0.356401	0.283	0.305	8.14e-13	1	CYTH2
5.05e-17	0.335533	0.277	0.294	9.39e-13	1	GPATCH8
5.66e-17	0.330532	0.372	0.427	1.05e-12	1	ERGIC3
8.98e-17	0.273158	0.265	0.272	1.67e-12	1	CYBA
5.85e-16	0.367397	0.344	0.396	1.09e-11	1	ERCC1
8.29e-16	0.349151	0.256	0.269	1.54e-11	1	ENSOARG00020003892
1.38e-15	0.29087	0.189	0.186	2.56e-11	1	ENSOARG00020018520
2e-15	0.28541	0.218	0.218	3.72e-11	1	NR3C1
2.23e-15	0.326729	0.196	0.196	4.15e-11	1	CDK12
2.64e-15	0.306092	0.174	0.169	4.91e-11	1	NRM
3.72e-15	0.260699	0.278	0.287	6.92e-11	1	ILK
4.39e-15	0.285159	0.166	0.16	8.16e-11	1	NEK9.1
4.61e-15	0.313386	0.336	0.375	8.57e-11	1	SNX2
4.68e-15	0.300843	0.204	0.206	8.7e-11	1	LSM1
7.84e-15	0.283702	0.181	0.177	1.46e-10	1	OSBPL8
1.95e-14	0.251592	0.141	0.133	3.62e-10	1	DNMT3A
2.02e-14	0.262604	0.137	0.129	3.77e-10	1	EHMT2
3.36e-14	0.31963	0.335	0.377	6.26e-10	1	TMEM50A
3.6e-14	0.278564	0.135	0.126	6.7e-10	1	RCAN1
3.88e-14	0.31421	0.281	0.304	7.22e-10	1	ENSOARG00020012334
5.27e-14	0.320937	0.371	0.433	9.8e-10	1	CFAP36
1.01e-13	0.342252	0.239	0.248	1.87e-09	1	ENSOARG00020006205
1.09e-13	0.310811	0.391	0.461	2.02e-09	1	VPS26A
1.24e-13	0.339131	0.233	0.244	2.31e-09	1	NR2F6
1.83e-13	0.327127	0.226	0.234	3.4e-09	1	YTHDF2
3.39e-13	0.277968	0.155	0.15	6.31e-09	1	ERLEC1
6.07e-13	0.258048	0.451	0.542	1.13e-08	1	GTF2H5
6.25e-13	0.285656	0.181	0.178	1.16e-08	1	ITSN1
1.99e-12	0.325147	0.323	0.362	3.7e-08	1	COPS2
2.03e-12	0.313022	0.38	0.44	3.77e-08	1	ENSOARG00020011110
2.36e-12	0.331689	0.293	0.325	4.39e-08	1	ENSOARG00020001313
2.44e-12	0.31557	0.377	0.44	4.54e-08	1	FXR1
2.93e-12	0.267485	0.138	0.131	5.44e-08	1	RPN1
3.63e-12	0.305251	0.279	0.3	6.75e-08	1	CLTC
3.73e-12	0.257308	0.134	0.127	6.95e-08	1	ENSOARG00020019367
4.47e-12	0.276245	0.416	0.492	8.32e-08	1	FKBP8
5.84e-12	0.357371	0.316	0.357	1.09e-07	1	ENSOARG00020007752
7.55e-12	0.304895	0.407	0.488	1.41e-07	1	POLR2H
7.87e-12	0.351775	0.344	0.398	1.46e-07	1	USP8
1.42e-11	0.256641	0.235	0.239	2.64e-07	1	CREBRF
1.77e-11	0.321223	0.197	0.202	3.29e-07	1	ILF3
2e-11	0.340452	0.251	0.271	3.73e-07	1	CWC27
3.19e-11	0.25299	0.293	0.387	5.94e-07	1	USP16
4.37e-11	0.342377	0.324	0.369	8.13e-07	1	SNRNP27
4.5e-11	0.341976	0.325	0.368	8.38e-07	1	PHF14
4.7e-11	0.324576	0.366	0.432	8.75e-07	1	FNTA
5.77e-11	0.26465	0.17	0.168	1.07e-06	1	KIF3A
6.12e-11	0.250872	0.203	0.261	1.14e-06	1	MRPL3
7.11e-11	0.28431	0.179	0.18	1.32e-06	1	RWDD4
9.46e-11	0.297428	0.218	0.224	1.76e-06	1	PBRM1
9.49e-11	0.25942	0.112	0.105	1.77e-06	1	ZNF330
2.78e-10	0.264844	0.15	0.147	5.17e-06	1	DNTTIP1
4.03e-10	0.276606	0.173	0.173	7.49e-06	1	CCDC174
4.14e-10	0.274634	0.445	0.536	7.7e-06	1	ENSOARG00020014624
5.4e-10	0.262287	0.316	0.348	1e-05	1	CACYBP
6.15e-10	0.280683	0.177	0.178	1.14e-05	1	TVP23B
9.19e-10	0.302294	0.198	0.205	1.71e-05	1	GMPS
1.05e-09	0.295228	0.184	0.187	1.95e-05	1	ENSOARG00020015834
1.12e-09	0.279983	0.174	0.175	2.08e-05	1	ZNF148
1.28e-09	0.31153	0.357	0.407	2.37e-05	1	ARID4B
1.6e-09	0.301224	0.209	0.217	2.98e-05	1	PUM1
1.83e-09	0.286874	0.39	0.464	3.41e-05	1	UFC1
1.89e-09	0.31287	0.332	0.377	3.52e-05	1	ENSOARG00020004727
2.1e-09	0.317674	0.189	0.195	3.91e-05	1	ENSOARG00020011224
3.76e-09	0.289481	0.146	0.144	6.99e-05	1	DSCC1
4.17e-09	0.278136	0.152	0.151	7.76e-05	1	CIBAR1
4.47e-09	0.305481	0.202	0.21	8.31e-05	1	MAPK1IP1L
4.84e-09	0.264334	0.143	0.141	9e-05	1	DAXX
5.81e-09	0.306721	0.23	0.243	0.000108087	1	CETN3
6.17e-09	0.290698	0.288	0.317	0.000114811	1	SNX6
6.22e-09	0.2862	0.405	0.482	0.000115802	1	ENSOARG00020014719
1.05e-08	0.300678	0.224	0.236	0.000196301	1	MACO1
1.22e-08	0.276069	0.198	0.203	0.000226215	1	MED13
1.59e-08	0.256554	0.145	0.142	0.000295493	1	EXT1
5.56e-08	0.251889	0.467	0.56	0.00103449	1	SRRM1
7.57e-08	0.274259	0.425	0.514	0.00140951	1	ENSOARG00020017391
2.37e-07	0.253394	0.406	0.487	0.00440141	1	MAGOH
3.66e-07	0.265696	0.171	0.174	0.00681708	1	ITFG1
3.78e-07	0.341027	0.333	0.376	0.0070353	1	DNMT1
5.39e-07	0.258666	0.275	0.351	0.0100287	1	ESF1
8.91e-07	0.305262	0.192	0.202	0.016585	1	TSEN34
1.73e-06	0.275208	0.204	0.215	0.0321558	1	CAPN2
2.11e-06	0.29496	0.359	0.42	0.0392372	1	NIPBL
0	2.63405	0.957	0.303	0	2	POSTN
0	2.56279	0.99	0.297	0	2	MDK
0	2.37391	0.974	0.237	0	2	VCAN
0	2.07147	1	0.522	0	2	IGF2
0	2.02603	0.758	0.103	0	2	SVEP1
0	1.93967	0.994	0.491	0	2	DCN
0	1.90245	0.869	0.179	0	2	TCF21
0	1.882	0.997	0.316	0	2	LUM
0	1.78108	0.551	0.069	0	2	SCRG1
0	1.70995	0.956	0.319	0	2	FBLN1
0	1.62784	0.96	0.4	0	2	CDKN1C
0	1.6035	0.797	0.209	0	2	CCND1
0	1.58245	0.986	0.574	0	2	RBP1
0	1.5544	0.765	0.201	0	2	ENSOARG00020013742
0	1.49242	0.723	0.165	0	2	ZEB2
0	1.47636	0.866	0.245	0	2	TCF4
0	1.46114	0.72	0.182	0	2	MYH10
0	1.36749	0.584	0.128	0	2	TMTC1
0	1.32102	0.726	0.228	0	2	SEPTIN11
0	1.30852	0.954	0.447	0	2	MARCKS
0	1.30435	0.648	0.145	0	2	ADGRL2
0	1.29276	0.67	0.156	0	2	NES
0	1.27625	0.733	0.173	0	2	EDNRA
0	1.25839	0.625	0.162	0	2	ECRG4
0	1.23247	0.858	0.567	0	2	HNRNPA1
0	1.21881	0.854	0.505	0	2	PSIP1
0	1.20409	0.811	0.462	0	2	CCND2
0	1.182	0.459	0.075	0	2	PDGFRA
0	1.17215	0.693	0.28	0	2	CCDC88A
0	1.16472	0.63	0.201	0	2	SMARCA1
0	1.12893	0.463	0.077	0	2	FAT4
0	1.12704	0.574	0.157	0	2	ENSOARG00020017596
0	1.12473	0.454	0.09	0	2	FN1
0	1.123	0.401	0.048	0	2	ENSOARG00020002928
0	1.11898	0.811	0.253	0	2	DLK1
0	1.11625	0.592	0.196	0	2	EPM2AIP1
0	1.09676	0.387	0.046	0	2	SLITRK6
0	1.09475	0.712	0.24	0	2	COL5A2
0	1.07772	0.759	0.403	0	2	ATXN7L3B
0	1.05986	0.663	0.288	0	2	COL18A1
0	1.04723	0.469	0.111	0	2	MEIS2
0	1.04641	0.85	0.553	0	2	HNRNPDL
0	1.04576	0.796	0.405	0	2	SRI
0	1.04115	0.846	0.557	0	2	DDX17
0	1.04076	0.996	0.898	0	2	ENSOARG00020009396
0	1.02249	0.426	0.075	0	2	VCAM1
0	1.01903	0.945	0.656	0	2	NDUFA4
0	1.01651	0.708	0.289	0	2	CDC42EP5
0	1.00769	0.761	0.267	0	2	SPARCL1
0	1.00693	0.999	0.933	0	2	H3F3A
0	0.973232	0.662	0.394	0	2	HNRNPA3
0	0.966361	0.683	0.203	0	2	NOVA1
0	0.962961	0.635	0.181	0	2	ENSOARG00020008540
0	0.961956	0.778	0.54	0	2	SMC3
0	0.961389	0.638	0.186	0	2	PDLIM3
0	0.957243	0.507	0.144	0	2	DAB2
0	0.954775	0.454	0.106	0	2	CDH11
0	0.949909	0.79	0.562	0	2	HNRNPU
0	0.945134	0.384	0.111	0	2	AKAP12
0	0.944583	0.835	0.561	0	2	MORF4L1
0	0.942168	0.712	0.299	0	2	GLIPR2
0	0.940491	0.603	0.184	0	2	COL12A1
0	0.9369	0.415	0.081	0	2	SFRP2
0	0.936608	0.958	0.337	0	2	APOE
0	0.929729	0.751	0.5	0	2	HNRNPD
0	0.921774	0.493	0.139	0	2	CEP170
0	0.919603	0.599	0.243	0	2	GALT
0	0.918122	0.978	0.824	0	2	ENSOARG00020017428
0	0.916978	0.81	0.591	0	2	TPR
0	0.914216	0.546	0.251	0	2	CBX5
0	0.908023	0.849	0.612	0	2	ENSOARG00020002907
0	0.905438	0.856	0.619	0	2	PNISR
0	0.899292	0.922	0.649	0	2	SEPTIN7
0	0.89498	0.931	0.708	0	2	ENSOARG00020006271
0	0.894849	0.49	0.164	0	2	TCF12
0	0.89435	0.634	0.287	0	2	MAGED2
0	0.891227	0.822	0.566	0	2	IK
0	0.887491	0.631	0.334	0	2	HNRNPK
0	0.886809	0.372	0.064	0	2	BMP4
0	0.884573	0.607	0.328	0	2	PARP1
0	0.882493	0.782	0.537	0	2	ENSOARG00020017232
0	0.878764	0.532	0.243	0	2	C4orf48
0	0.87841	0.434	0.147	0	2	CNTLN
0	0.87538	0.877	0.636	0	2	HMGN3
0	0.873997	0.346	0.059	0	2	TMEM132C
0	0.873905	0.823	0.586	0	2	ARGLU1
0	0.87077	0.682	0.291	0	2	CKAP4
0	0.870031	0.573	0.253	0	2	ASPH
0	0.869318	0.847	0.628	0	2	PNN
0	0.868647	0.989	0.377	0	2	COL1A1
0	0.864203	0.49	0.241	0	2	ENSOARG00020001988
0	0.863243	0.452	0.108	0	2	COL6A3
0	0.859726	0.348	0.051	0	2	PLEKHH2
0	0.859432	0.796	0.531	0	2	JAK1
0	0.85762	0.588	0.217	0	2	EFEMP2
0	0.854282	0.416	0.128	0	2	TLN2
0	0.853803	0.323	0.042	0	2	COL25A1
0	0.851838	0.504	0.125	0	2	LAMA2
0	0.849428	0.649	0.385	0	2	ENSOARG00020014959
0	0.846872	0.972	0.822	0	2	TMA7
0	0.844944	0.559	0.317	0	2	TOP2B
0	0.834966	0.643	0.403	0	2	SENP6
0	0.834113	0.66	0.412	0	2	ENSOARG00020003552
0	0.830059	0.77	0.299	0	2	FSTL1
0	0.824579	0.36	0.096	0	2	ROBO2
0	0.821507	0.593	0.233	0	2	FILIP1L
0	0.820652	0.989	0.878	0	2	ENSOARG00020005570
0	0.820246	0.559	0.322	0	2	SUPT16H
0	0.819327	0.384	0.103	0	2	ENSOARG00020016278
0	0.818944	0.552	0.316	0	2	BZW2
0	0.818692	0.453	0.145	0	2	MYO1B
0	0.818534	0.398	0.089	0	2	MATN2
0	0.818486	0.576	0.303	0	2	ENSOARG00020004698
0	0.814714	0.635	0.384	0	2	PCM1
0	0.809509	0.52	0.263	0	2	GOLIM4
0	0.809319	0.479	0.232	0	2	NONO
0	0.8009	0.559	0.306	0	2	ENSOARG00020013817
0	0.799341	0.481	0.161	0	2	ENSOARG00020001067
0	0.798267	0.918	0.718	0	2	NUCKS1
0	0.798095	0.514	0.229	0	2	LAMB1
0	0.797715	0.588	0.357	0	2	ZC3H13
0	0.796573	0.538	0.359	0	2	DNMT1
0	0.79485	0.639	0.341	0	2	TPM4
0	0.794465	0.32	0.066	0	2	ENSOARG00020013102
0	0.793184	0.28	0.022	0	2	EDIL3
0	0.791051	0.459	0.172	0	2	CBX1
0	0.789833	0.858	0.68	0	2	ENSOARG00020011332
0	0.786731	0.719	0.496	0	2	PAFAH1B3
0	0.78607	0.604	0.357	0	2	ENSOARG00020006505
0	0.785129	0.969	0.519	0	2	CALD1
0	0.784972	0.584	0.387	0	2	SMC1A
0	0.783329	0.529	0.305	0	2	BAZ2B
0	0.782715	0.614	0.225	0	2	ENSOARG00020003348
0	0.781982	0.838	0.63	0	2	HNRNPH3
0	0.780065	0.517	0.313	0	2	SMARCC1
0	0.778225	0.985	0.51	0	2	VIM
0	0.777452	0.463	0.145	0	2	NR2F2
0	0.777107	0.856	0.689	0	2	HNRNPA2B1
0	0.777055	0.793	0.599	0	2	ENSOARG00020017255
0	0.776085	0.682	0.468	0	2	BPTF
0	0.770647	0.236	0.026	0	2	ENSOARG00020014440
0	0.769892	0.775	0.545	0	2	RTF1
0	0.768204	0.488	0.261	0	2	REST
0	0.767649	0.456	0.222	0	2	KAT6B
0	0.767591	0.72	0.513	0	2	CALR
0	0.76379	0.862	0.693	0	2	PRRC2C
0	0.763493	0.79	0.346	0	2	EMP3
0	0.762937	0.411	0.116	0	2	LAMA4
0	0.760861	0.474	0.23	0	2	TAF7
0	0.758111	0.63	0.408	0	2	YTHDC1
0	0.757989	0.766	0.521	0	2	PTOV1
0	0.757904	0.621	0.387	0	2	LMAN1
0	0.757196	0.55	0.305	0	2	CHD3
0	0.756568	0.825	0.612	0	2	ENSOARG00020001641
0	0.755776	0.369	0.119	0	2	IGF2BP2
0	0.754693	0.836	0.635	0	2	RBM39
0	0.753673	0.454	0.203	0	2	SMARCA2
0	0.753117	0.961	0.778	0	2	GNAS
0	0.752269	0.614	0.396	0	2	ENSOARG00020005773
0	0.751848	0.66	0.257	0	2	LTBP4
0	0.740746	0.767	0.462	0	2	DDAH2
0	0.739838	0.475	0.266	0	2	PITX1
0	0.73764	0.609	0.464	0	2	ENSOARG00020000265
0	0.737041	0.62	0.352	0	2	ENSOARG00020023265
0	0.736994	0.885	0.744	0	2	DEK
0	0.736721	0.72	0.5	0	2	ENSOARG00020014495
0	0.735433	0.774	0.573	0	2	RSRC2
0	0.73507	0.559	0.349	0	2	PHF14
0	0.734283	0.485	0.245	0	2	HEBP1
0	0.732386	0.724	0.498	0	2	ENSOARG00020000452
0	0.731309	0.848	0.667	0	2	ENSOARG00020002933
0	0.730407	0.634	0.356	0	2	SVBP
0	0.729043	0.724	0.521	0	2	CDC5L
0	0.72812	0.682	0.505	0	2	PPIG
0	0.727711	0.425	0.162	0	2	RBFOX2
0	0.726095	0.424	0.131	0	2	HDGFL3
0	0.725222	0.368	0.085	0	2	PGM5
0	0.721213	0.463	0.228	0	2	ENSOARG00020006136
0	0.720014	0.93	0.778	0	2	SERBP1
0	0.719883	0.557	0.327	0	2	TERF2IP
0	0.718106	0.368	0.088	0	2	COL5A1
0	0.716493	0.523	0.286	0	2	SPATS2L
0	0.71587	0.618	0.399	0	2	PRPF4B
0	0.71431	0.581	0.395	0	2	BCLAF1
0	0.71373	0.373	0.084	0	2	GJC1
0	0.711168	0.508	0.242	0	2	IFT27
0	0.70502	0.313	0.097	0	2	CCN1
0	0.70429	0.299	0.062	0	2	CAPRIN2
0	0.703796	0.35	0.104	0	2	PRTFDC1
0	0.703241	0.289	0.052	0	2	PTPRD
0	0.70123	0.282	0.065	0	2	GPC3
0	0.69734	0.452	0.23	0	2	IFT74
0	0.696539	0.583	0.398	0	2	CFDP1
0	0.693161	0.418	0.178	0	2	SMAD5
0	0.693056	0.32	0.073	0	2	FBN2
0	0.692958	0.62	0.395	0	2	ENSOARG00020023340
0	0.688693	0.565	0.36	0	2	ENSOARG00020002318
0	0.687938	0.619	0.318	0	2	RDX
0	0.685696	0.582	0.378	0	2	ZNF292
0	0.683493	0.738	0.549	0	2	U2SURP
0	0.682982	0.312	0.145	0	2	HELLS
0	0.682805	0.476	0.169	0	2	SGCE
0	0.679364	0.887	0.708	0	2	SON
0	0.676273	0.413	0.119	0	2	BCHE
0	0.674722	0.542	0.347	0	2	ZNF644
0	0.673888	0.791	0.331	0	2	IGFBP4
0	0.673458	0.349	0.095	0	2	ARHGAP28
0	0.673427	0.468	0.261	0	2	TMPO
0	0.673104	0.447	0.254	0	2	PIK3R1
0	0.671026	0.409	0.177	0	2	AP2B1
0	0.670494	0.831	0.661	0	2	HNRNPM
0	0.667988	0.48	0.259	0	2	TUT4
0	0.667561	0.427	0.216	0	2	HNRNPH1
0	0.66509	0.276	0.045	0	2	PCDH18
0	0.66304	0.559	0.361	0	2	SMARCE1
0	0.661989	0.547	0.383	0	2	MPHOSPH8
0	0.659188	0.63	0.463	0	2	ENSOARG00020014719
0	0.657785	0.248	0.054	0	2	SCT
0	0.65671	0.434	0.248	0	2	ENSOARG00020014026
0	0.656705	0.467	0.263	0	2	ENSOARG00020009065
0	0.65619	0.605	0.43	0	2	PHF3
0	0.65585	0.39	0.204	0	2	INKA1
0	0.655154	0.441	0.252	0	2	RFC1
0	0.653733	0.68	0.503	0	2	THRAP3
0	0.653554	0.533	0.323	0	2	RAB14
0	0.652582	0.35	0.121	0	2	TET1
0	0.651384	0.76	0.608	0	2	RBM25
0	0.650408	0.395	0.128	0	2	FGFR1
0	0.650342	0.224	0.038	0	2	SULF1
0	0.649388	0.41	0.2	0	2	ENSOARG00020000793
0	0.649216	0.492	0.321	0	2	DMAC1
0	0.648872	0.633	0.436	0	2	ENSOARG00020021294
0	0.648443	0.527	0.306	0	2	SPAG9
0	0.64801	0.547	0.235	0	2	ITIH5
0	0.64365	0.223	0.027	0	2	COL24A1
0	0.641636	0.53	0.331	0	2	KHDRBS1
0	0.640452	0.991	0.851	0	2	CD63
0	0.638596	0.998	0.423	0	2	COL3A1
0	0.638356	0.623	0.444	0	2	OSTC
0	0.636485	0.55	0.272	0	2	PTN
0	0.636454	0.623	0.431	0	2	CWC15
0	0.63641	0.852	0.599	0	2	ITGB1
0	0.635649	0.778	0.593	0	2	RTRAF
0	0.635388	0.651	0.44	0	2	RBPJ
0	0.634983	0.347	0.138	0	2	LRP1
0	0.633449	0.271	0.04	0	2	NID1
0	0.632187	0.362	0.167	0	2	HMGB3
0	0.629673	0.464	0.277	0	2	DHX9
0	0.629132	0.498	0.3	0	2	SNX6
0	0.628876	0.497	0.336	0	2	ENSOARG00020012822
0	0.627405	0.511	0.332	0	2	MESD
0	0.626481	0.298	0.079	0	2	PEG10
0	0.625896	0.601	0.405	0	2	DNAJC8
0	0.62542	0.995	0.906	0	2	PPIB
0	0.624547	0.933	0.793	0	2	ERH
0	0.622378	0.556	0.341	0	2	ACBD3
0	0.621894	0.463	0.273	0	2	CCDC186
0	0.621478	0.626	0.463	0	2	SF3B2
0	0.619679	0.353	0.139	0	2	LRP6
0	0.617763	0.418	0.246	0	2	ENSOARG00020008671
0	0.617349	0.284	0.054	0	2	PTH1R
0	0.617333	0.729	0.564	0	2	ENSOARG00020002300
0	0.617213	0.475	0.222	0	2	GPX8
0	0.616961	0.421	0.245	0	2	APC
0	0.616207	0.301	0.107	0	2	STAMBPL1
0	0.615466	0.805	0.636	0	2	C19orf53
0	0.613665	0.584	0.243	0	2	METRNL
0	0.613385	0.228	0.031	0	2	SEMA3A
0	0.613041	0.5	0.327	0	2	GLRX5
0	0.610184	0.239	0.034	0	2	ADAMTS19
0	0.609542	0.489	0.183	0	2	SPARC
0	0.609424	0.391	0.207	0	2	UBTF
0	0.608808	0.365	0.094	0	2	REM1
0	0.607336	0.45	0.283	0	2	MSH6
0	0.606732	0.266	0.092	0	2	RAI14
0	0.606217	0.43	0.23	0	2	PDS5B
0	0.605728	0.476	0.321	0	2	ENSOARG00020002040
0	0.604888	0.312	0.076	0	2	DCHS1
0	0.604661	0.43	0.249	0	2	COPB2
0	0.604084	0.564	0.397	0	2	ST13
0	0.602945	0.387	0.194	0	2	PDIA6
0	0.601328	0.262	0.073	0	2	ENSOARG00020021371
0	0.601274	0.317	0.095	0	2	DBN1
0	0.598924	0.306	0.111	0	2	TADA2A
0	0.598008	0.591	0.421	0	2	PDAP1
0	0.597039	0.392	0.21	0	2	FUBP1
0	0.596452	0.247	0.048	0	2	MPDZ
0	0.595152	0.715	0.251	0	2	PLAC9
0	0.594993	0.478	0.261	0	2	APP
0	0.594882	0.514	0.227	0	2	LOXL1
0	0.594353	0.587	0.441	0	2	ARHGAP5
0	0.592432	0.447	0.245	0	2	ZFYVE16
0	0.592369	0.444	0.262	0	2	HTATSF1
0	0.591818	0.69	0.54	0	2	SRRM1
0	0.58745	0.34	0.114	0	2	MAP1A
0	0.587085	0.373	0.191	0	2	SRSF3
0	0.586319	0.34	0.141	0	2	FAT1
0	0.583482	0.231	0.036	0	2	ENSOARG00020018633
0	0.583087	0.406	0.199	0	2	ENSOARG00020023650
0	0.582846	0.796	0.634	0	2	PARK7
0	0.582034	0.771	0.539	0	2	S100A13
0	0.581393	0.542	0.38	0	2	SNW1
0	0.580461	0.241	0.057	0	2	LYPD1
0	0.580436	0.426	0.221	0	2	PTTG1IP
0	0.579213	0.552	0.385	0	2	CZIB
0	0.578824	0.393	0.184	0	2	FNBP1L
0	0.578515	0.292	0.101	0	2	GOLM1
0	0.57845	0.829	0.671	0	2	CDKN2AIPNL
0	0.578418	0.679	0.518	0	2	SF3B1
0	0.577299	0.355	0.11	0	2	COL6A2
0	0.577262	0.431	0.225	0	2	PAXBP1
0	0.575873	0.578	0.432	0	2	LSM8
0	0.575281	0.389	0.185	0	2	P4HA1
0	0.574965	0.698	0.524	0	2	YWHAB
0	0.574865	0.824	0.657	0	2	CNBP
0	0.574843	0.282	0.13	0	2	IPO8
0	0.574055	0.961	0.823	0	2	EIF3M
0	0.572231	0.385	0.18	0	2	RCN2
0	0.572166	0.551	0.248	0	2	P4HA2
0	0.57159	0.402	0.228	0	2	MFAP1
0	0.571034	0.558	0.404	0	2	APLP2
0	0.570331	0.806	0.531	0	2	ENSOARG00020017201
0	0.570331	0.472	0.293	0	2	KIDINS220
0	0.569565	0.628	0.482	0	2	DDX46
0	0.568585	0.497	0.302	0	2	ENSOARG00020012860
0	0.568054	0.343	0.169	0	2	ENSOARG00020019963
0	0.567912	0.634	0.484	0	2	TRIM28
0	0.566689	0.226	0.044	0	2	ENSOARG00020019405
0	0.566413	0.289	0.101	0	2	TRPS1
0	0.566346	0.574	0.422	0	2	C11orf58
0	0.565342	0.283	0.112	0	2	PDCD4
0	0.564939	0.747	0.599	0	2	CCT8
0	0.564578	0.408	0.231	0	2	SEC63
0	0.564116	0.27	0.075	0	2	FZD2
0	0.563629	0.347	0.135	0	2	RGS2
0	0.563518	0.285	0.147	0	2	ACOT7
0	0.561863	0.655	0.506	0	2	ENSOARG00020008821
0	0.55967	0.531	0.349	0	2	HP1BP3
0	0.558745	0.775	0.597	0	2	BRI3
0	0.557665	0.281	0.073	0	2	ANXA6
0	0.556505	0.681	0.539	0	2	KMT2E
0	0.555131	0.267	0.084	0	2	PLCXD2
0	0.554852	0.205	0.034	0	2	PTCH1
0	0.554523	0.191	0.012	0	2	HAPLN1
0	0.553364	0.474	0.275	0	2	RBMS1
0	0.553207	0.443	0.287	0	2	VIRMA
0	0.553132	0.437	0.213	0	2	FAM114A1
0	0.552409	0.239	0.041	0	2	PDE1A
0	0.550889	0.575	0.411	0	2	DHX36
0	0.549117	0.668	0.512	0	2	YWHAE
0	0.549115	0.218	0.029	0	2	GPC6
0	0.549061	0.29	0.122	0	2	ENSOARG00020004681
0	0.54809	0.278	0.067	0	2	NCAM1
0	0.548031	0.515	0.405	0	2	GOLGB1
0	0.547435	0.249	0.062	0	2	ENSOARG00020006597
0	0.547158	0.662	0.54	0	2	EIF5B
0	0.546697	0.876	0.736	0	2	SUB1
0	0.545117	0.35	0.18	0	2	KDM1A
0	0.543824	0.233	0.048	0	2	ZNF608
0	0.542014	0.943	0.803	0	2	EIF3E
0	0.541349	0.593	0.456	0	2	SRSF11
0	0.5412	0.472	0.344	0	2	ENSOARG00020007752
0	0.54057	0.361	0.188	0	2	TMEM131L
0	0.539866	0.317	0.139	0	2	SPART
0	0.539677	0.531	0.405	0	2	NIPBL
0	0.53949	0.277	0.087	0	2	TCF7L1
0	0.538604	0.69	0.494	0	2	RRBP1
0	0.53835	0.259	0.058	0	2	COLEC12
0	0.53808	0.462	0.318	0	2	FAM133B
0	0.538038	0.384	0.231	0	2	CETN3
0	0.538003	0.408	0.261	0	2	PSPC1
0	0.537722	0.476	0.334	0	2	ACIN1
0	0.536799	0.464	0.316	0	2	RBM4
0	0.536717	0.433	0.292	0	2	RBM26
0	0.536405	0.33	0.178	0	2	RASA1
0	0.535609	0.324	0.12	0	2	CAP2
0	0.533793	0.262	0.104	0	2	EPB41
0	0.532361	0.232	0.054	0	2	CARD11
0	0.53182	0.269	0.11	0	2	MSH2
0	0.53171	0.33	0.177	0	2	TCF7L2
0	0.530198	0.69	0.541	0	2	FUS
0	0.530064	0.773	0.619	0	2	SNRPD1
0	0.529936	0.418	0.276	0	2	FMC1-LUC7L2
0	0.529861	0.379	0.222	0	2	SNRNP200
0	0.529067	0.3	0.147	0	2	TP53BP1
0	0.527982	0.461	0.321	0	2	ENSOARG00020018830
0	0.527699	0.894	0.755	0	2	SRRM2
0	0.526641	0.254	0.091	0	2	ENSOARG00020015455
0	0.52576	0.243	0.069	0	2	ENSOARG00020024424
0	0.525747	0.499	0.362	0	2	ENSOARG00020004727
0	0.523961	0.427	0.222	0	2	SOX4
0	0.52367	0.671	0.492	0	2	EIF1B
0	0.523514	0.434	0.314	0	2	MEIS1
0	0.523308	0.191	0.05	0	2	ITGA4
0	0.523217	0.901	0.764	0	2	ENSOARG00020017329
0	0.521119	0.397	0.259	0	2	CWC27
0	0.520861	0.49	0.348	0	2	COPS2
0	0.519944	0.36	0.173	0	2	P3H4
0	0.519568	0.406	0.255	0	2	REV3L
0	0.519212	0.696	0.55	0	2	CHCHD1
0	0.519164	0.299	0.119	0	2	ZNF428
0	0.518601	0.218	0.037	0	2	OLFML3
0	0.518346	0.353	0.144	0	2	TMEM263
0	0.517767	0.558	0.419	0	2	PDIA3
0	0.516429	0.456	0.334	0	2	ESF1
0	0.514993	0.441	0.292	0	2	DYNC1I2
0	0.514919	0.404	0.231	0	2	ACAP2
0	0.514894	0.755	0.615	0	2	LSM7
0	0.514617	0.601	0.467	0	2	CHD9
0	0.513686	0.286	0.127	0	2	SEL1L
0	0.513064	0.414	0.279	0	2	NUDT14
0	0.512668	0.39	0.243	0	2	TRIP6
0	0.511546	0.514	0.368	0	2	MRPL17
0	0.511457	0.192	0.024	0	2	TOR4A
0	0.511414	0.489	0.37	0	2	ENSOARG00020012767
0	0.510579	0.208	0.083	0	2	MCM4
0	0.510414	0.316	0.094	0	2	GNG2
0	0.510209	0.344	0.203	0	2	SRSF10
0	0.510025	0.322	0.18	0	2	ENSOARG00020021145
0	0.509874	0.33	0.177	0	2	CTNNB1
0	0.509715	0.522	0.393	0	2	ARID4B
0	0.509655	0.256	0.064	0	2	PROS1
0	0.507858	0.617	0.504	0	2	PRPF40A
0	0.507131	0.891	0.76	0	2	RAN
0	0.506903	0.406	0.24	0	2	ATOX1
0	0.506831	0.268	0.124	0	2	ARFGEF1
0	0.506756	0.321	0.16	0	2	PITPNB
0	0.504664	0.423	0.303	0	2	LRRCC1
0	0.503649	0.624	0.466	0	2	ISCU
0	0.503493	0.528	0.406	0	2	SPAG7
0	0.503428	0.382	0.251	0	2	ZFR
0	0.50319	0.391	0.253	0	2	PRMT1
0	0.502672	0.61	0.4	0	2	RBM3
0	0.502561	0.296	0.077	0	2	TMEM176B
0	0.501884	0.361	0.225	0	2	PPP4R2
0	0.500765	0.344	0.2	0	2	DDX42
0	0.500446	0.555	0.405	0	2	ZNF326
0	0.500195	0.523	0.392	0	2	NSD3
0	0.499134	0.398	0.272	0	2	PHIP
0	0.498394	0.323	0.18	0	2	RPAP3
0	0.498288	0.473	0.35	0	2	DDX1
0	0.49709	0.309	0.173	0	2	EIF4G3
0	0.496721	0.539	0.375	0	2	NENF
0	0.495649	0.93	0.782	0	2	H2AZ2
0	0.495528	0.316	0.16	0	2	THAP12
0	0.495096	0.146	0.007	0	2	COL6A5
0	0.494864	0.216	0.081	0	2	MYO6
0	0.494863	0.356	0.227	0	2	CTNNBL1
0	0.494117	0.336	0.208	0	2	ROBO1
0	0.493918	0.325	0.161	0	2	SEPTIN2
0	0.493501	0.279	0.096	0	2	GNB4
0	0.493269	0.237	0.069	0	2	C12orf75
0	0.493042	0.305	0.18	0	2	BAZ1B
0	0.492741	0.786	0.644	0	2	ENSOARG00020002686
0	0.492418	0.548	0.428	0	2	RSF1
0	0.492179	0.706	0.564	0	2	PFDN2
0	0.491502	0.768	0.626	0	2	MTDH
0	0.490615	0.94	0.825	0	2	HSP90B1
0	0.489981	0.508	0.406	0	2	ENSOARG00020022338
0	0.489702	0.17	0.021	0	2	COX6B2
0	0.489669	0.223	0.043	0	2	HOXB7
0	0.489664	0.449	0.321	0	2	SMC6
0	0.488376	0.495	0.364	0	2	LIMA1
0	0.488306	0.676	0.542	0	2	DDOST
0	0.487087	0.306	0.173	0	2	DLG1
0	0.486669	0.22	0.042	0	2	NR2F1
0	0.486071	0.329	0.193	0	2	XPO1
0	0.48522	0.485	0.358	0	2	SRRT
0	0.484962	0.386	0.211	0	2	KIF2A
0	0.484729	0.265	0.12	0	2	CEP162
0	0.483452	0.222	0.076	0	2	FOXP2
0	0.481499	0.763	0.647	0	2	ENSOARG00020025630
0	0.481259	0.275	0.114	0	2	POGLUT2
0	0.481199	0.958	0.847	0	2	ENSOARG00020026347
0	0.481014	0.422	0.276	0	2	WASF2
0	0.480548	0.542	0.425	0	2	ENSOARG00020011110
0	0.480179	0.232	0.086	0	2	BLVRA
0	0.479758	0.502	0.369	0	2	ENSOARG00020001921
0	0.479556	0.214	0.069	0	2	SERPINE2
0	0.479463	0.563	0.475	0	2	TMA16
0	0.479381	0.199	0.05	0	2	LIMCH1
0	0.479057	0.372	0.248	0	2	ZNRD1
0	0.478534	0.607	0.497	0	2	ENSOARG00020017391
0	0.477913	0.549	0.423	0	2	YY1
0	0.477904	0.207	0.044	0	2	H2AFY2
0	0.477102	0.504	0.387	0	2	ZC3H15
0	0.476429	0.247	0.069	0	2	PEAK1
0	0.476283	0.285	0.151	0	2	ZADH2
0	0.476047	0.319	0.175	0	2	PAGR1
0	0.475984	0.456	0.336	0	2	ETAA1
0	0.475041	0.277	0.143	0	2	ZNF462
0	0.474628	0.588	0.469	0	2	NOP10
0	0.474627	0.385	0.201	0	2	PLEKHO1
0	0.474524	0.43	0.314	0	2	SCAF11
0	0.47448	0.176	0.026	0	2	RYR2
0	0.473843	0.402	0.267	0	2	ZC3H11A
0	0.472453	0.208	0.046	0	2	ETV1
0	0.471935	0.404	0.295	0	2	KDM5B
0	0.471607	0.55	0.423	0	2	ENSOARG00020024153
0	0.470656	0.196	0.042	0	2	MOB3B
0	0.4704	0.324	0.203	0	2	EIF2AK4
0	0.470255	0.32	0.171	0	2	PPIL4
0	0.469811	0.965	0.865	0	2	UBL5
0	0.46967	0.448	0.342	0	2	CANX
0	0.469417	0.464	0.348	0	2	BOD1L1
0	0.469312	0.418	0.283	0	2	ILKAP
0	0.469113	0.24	0.111	0	2	LMNB1
0	0.469035	0.459	0.321	0	2	USP34
0	0.468666	0.599	0.485	0	2	LUC7L3
0	0.467264	0.422	0.289	0	2	CCS
0	0.466675	0.27	0.121	0	2	CSNK1G3
0	0.46575	0.63	0.477	0	2	SFPQ
0	0.465688	0.273	0.132	0	2	PHF6
0	0.465487	0.23	0.089	0	2	PBX1
0	0.465284	0.623	0.504	0	2	SARNP
0	0.464064	0.26	0.118	0	2	RHOD
0	0.463231	0.323	0.214	0	2	ATIC
0	0.463065	0.309	0.164	0	2	RNF169
0	0.462529	0.475	0.3	0	2	COL16A1
0	0.462034	0.335	0.2	0	2	SMARCC2
0	0.461684	0.317	0.192	0	2	ILF3
0	0.460574	0.434	0.317	0	2	DNAJC10
0	0.460561	0.811	0.534	0	2	ENSOARG00020004948
0	0.46039	0.239	0.111	0	2	H1F0
0	0.460307	0.342	0.213	0	2	CREBZF
0	0.459362	0.289	0.135	0	2	DOCK7
0	0.459159	0.902	0.773	0	2	SSR2
0	0.458923	0.258	0.124	0	2	DNMT3A
0	0.45877	0.995	0.938	0	2	SERF2
0	0.458769	0.371	0.262	0	2	CSNK2A1
0	0.458618	0.265	0.133	0	2	EXT1
0	0.458389	0.433	0.329	0	2	CIR1
0	0.457586	0.805	0.677	0	2	ENSOARG00020004077
0	0.457505	0.241	0.097	0	2	SETBP1
0	0.457161	0.22	0.061	0	2	PRKG1
0	0.456987	0.242	0.137	0	2	DNAJC9
0	0.456651	0.388	0.24	0	2	NRBP1
0	0.456177	0.705	0.581	0	2	TRMT112
0	0.455717	0.312	0.171	0	2	RBM5
0	0.454595	0.461	0.357	0	2	SNRNP27
0	0.453407	0.647	0.519	0	2	SMARCA5
0	0.452927	0.268	0.095	0	2	F2R
0	0.452409	0.661	0.551	0	2	ENSOARG00020026150
0	0.452394	0.219	0.065	0	2	ENSOARG00020012853
0	0.450121	0.33	0.21	0	2	HERC1
0	0.450102	0.316	0.105	0	2	PRKAR2B
0	0.450032	0.368	0.201	0	2	ADD3
0	0.449759	0.176	0.022	0	2	FOXF1
0	0.449056	0.747	0.619	0	2	NDUFS4
0	0.448505	0.253	0.139	0	2	ACO1
0	0.448213	0.555	0.362	0	2	ARF4
0	0.447887	0.653	0.545	0	2	PSMC3
0	0.447281	0.258	0.122	0	2	MYO9A
0	0.446512	0.707	0.582	0	2	SSB
0	0.446097	0.555	0.446	0	2	VPS26A
0	0.446077	0.35	0.231	0	2	ENSOARG00020015772
0	0.445455	0.262	0.097	0	2	RBP4
0	0.445385	0.42	0.305	0	2	LSM2
0	0.444583	0.282	0.148	0	2	P4HB
0	0.444018	0.275	0.162	0	2	XRCC1
0	0.443509	0.249	0.135	0	2	DICER1
0	0.442314	0.272	0.146	0	2	ATAD2
0	0.440988	0.984	0.38	0	2	COL1A2
0	0.439471	0.236	0.116	0	2	ERCC6L2
0	0.439341	0.313	0.14	0	2	LAMC1
[truncated: 16,852 more rows]

## Sheet: Table S4
Table S4. Clusters of expressed genes defined by rumen scRNA-Seq expression data in goats.
The column name annotation: ( p_val (p_value); avg_logFC (average log fold change); pct.1 (ratio of cells in this cluster that expressed the gene); pct.2 (ratio of cells in the rest of clusters that expressed the gene); p_val_adj (Bonferroni corrected p_value)
P_val	Avg_log2FC	Pct.1	Pct.2	P_val_adj	Clusters	Genes
0	4.17788	0.803	0.065	0	0	PLVAP
0	3.22007	0.782	0.034	0	0	PECAM1
0	2.87862	0.574	0.059	0	0	STC1
0	2.87745	0.538	0.048	0	0	ENSCHIG00000021348
0	2.85377	0.588	0.085	0	0	DEPP1
0	2.85254	0.904	0.465	0	0	TM4SF1
0	2.59622	0.261	0.031	0	0	SELP
0	2.59057	0.828	0.222	0	0	RAMP2
0	2.58111	0.748	0.055	0	0	ESAM
0	2.51802	0.821	0.315	0	0	TFPI2
0	2.51643	0.634	0.029	0	0	SOX18
0	2.47649	0.545	0.144	0	0	RND1
0	2.46969	0.643	0.028	0	0	LMO2
0	2.40948	0.67	0.029	0	0	VWF
0	2.34723	0.863	0.274	0	0	CAV1
0	2.3106	0.776	0.16	0	0	ENSCHIG00000006308
0	2.27331	0.802	0.486	0	0	ENSCHIG00000014217
0	2.24213	0.721	0.181	0	0	ENG
0	2.18129	0.977	0.421	0	0	CLEC3B
0	2.15384	0.619	0.02	0	0	MYCT1
0	2.13392	0.56	0.027	0	0	KDR
0	2.11926	0.736	0.19	0	0	TCN2
0	2.07118	0.807	0.473	0	0	EMP1
0	1.95511	0.697	0.198	0	0	SLC2A3
0	1.94008	0.561	0.047	0	0	SCARB1
0	1.92869	0.619	0.279	0	0	SGK1
0	1.90916	0.634	0.226	0	0	NEDD9
0	1.89182	0.464	0.035	0	0	ENSCHIG00000009551
0	1.88604	0.351	0.019	0	0	CD36
0	1.85729	0.665	0.253	0	0	EFNB2
0	1.85163	0.512	0.016	0	0	ROBO4
0	1.81404	0.636	0.221	0	0	SWAP70
0	1.80226	0.584	0.152	0	0	ENSCHIG00000016060
0	1.79824	0.521	0.018	0	0	ADGRL4
0	1.76204	0.477	0.019	0	0	FLT1
0	1.75492	0.118	0.006	0	0	PNOC
0	1.72293	0.447	0.06	0	0	OAS1
0	1.72256	0.847	0.605	0	0	SPTBN1
0	1.70524	0.471	0.147	0	0	PRDM1
0	1.66831	0.551	0.146	0	0	LPAR6
0	1.64577	0.565	0.068	0	0	PSMB9
0	1.63599	0.953	0.861	0	0	ENSCHIG00000021423
0	1.62528	0.431	0.021	0	0	MEOX1
0	1.62093	0.507	0.067	0	0	C1orf115
0	1.59133	0.546	0.107	0	0	CALCRL
0	1.57878	0.708	0.365	0	0	UTRN
0	1.57328	0.195	0.054	0	0	FABP4
0	1.57081	0.711	0.408	0	0	PLK2
0	1.55938	0.736	0.28	0	0	IGFBP7
0	1.49137	0.443	0.014	0	0	PTPRB
0	1.47867	0.624	0.213	0	0	CAV2
0	1.47794	0.801	0.509	0	0	TIMP3
0	1.47015	0.594	0.174	0	0	NRP1
0	1.45947	0.126	0.013	0	0	CA4
0	1.45917	0.494	0.112	0	0	KITLG
0	1.45593	0.548	0.227	0	0	IFNGR1
0	1.45146	0.362	0.022	0	0	ENSCHIG00000009663
0	1.43737	0.19	0.017	0	0	ACKR1
0	1.42283	0.723	0.362	0	0	SPARCL1
0	1.41605	0.612	0.207	0	0	ARHGAP29
0	1.40892	0.505	0.1	0	0	LIMCH1
0	1.37601	0.282	0.084	0	0	PLAU
0	1.37428	0.15	0.02	0	0	CCL8
0	1.36938	0.57	0.205	0	0	F11R
0	1.36134	0.538	0.122	0	0	GNG11
0	1.35606	0.311	0.027	0	0	NCF4
0	1.35227	0.625	0.285	0	0	DLC1
0	1.34297	0.35	0.083	0	0	ISG15
0	1.33361	0.602	0.289	0	0	WWTR1
0	1.32808	0.895	0.758	0	0	ITM2B
0	1.30323	0.499	0.222	0	0	COL4A1
0	1.29587	0.615	0.106	0	0	ENSCHIG00000019467
0	1.28433	0.669	0.436	0	0	SYNE2
0	1.2613	0.402	0.015	0	0	ENSCHIG00000026728
0	1.25879	0.332	0.008	0	0	TNFSF10
0	1.24347	0.257	0.017	0	0	ENSCHIG00000021899
0	1.23743	0.474	0.172	0	0	DUSP6
0	1.23739	0.492	0.185	0	0	SMAD1
0	1.2369	0.536	0.265	0	0	ARL4A
0	1.23372	0.593	0.258	0	0	ANXA3
0	1.22549	0.543	0.26	0	0	CDH13
0	1.21853	0.536	0.172	0	0	ETS1
0	1.2176	0.532	0.128	0	0	FILIP1
0	1.21537	0.383	0.032	0	0	PREX2
0	1.20719	0.432	0.064	0	0	FLI1
0	1.19691	0.686	0.444	0	0	ETS2
0	1.18454	0.452	0.16	0	0	PALMD
0	1.18438	0.598	0.238	0	0	ENSCHIG00000026985
0	1.18074	0.571	0.256	0	0	PSMB10
0	1.17844	0.708	0.411	0	0	NPDC1
0	1.17555	0.425	0.214	0	0	TXNIP
0	1.14781	0.394	0.017	0	0	ENSCHIG00000019712
0	1.14487	0.337	0.09	0	0	STX11
0	1.14283	0.408	0.078	0	0	PLSCR1
0	1.13028	0.988	0.718	0	0	VIM
0	1.11329	0.531	0.203	0	0	LMCD1
0	1.1132	0.339	0.031	0	0	ABCG2
0	1.10986	0.407	0.101	0	0	KIAA0355
0	1.09856	0.525	0.113	0	0	ARHGDIB
0	1.09237	0.496	0.155	0	0	C1QTNF5
0	1.09213	0.334	0.062	0	0	IFIH1
0	1.08822	0.326	0.007	0	0	EMCN
0	1.08559	0.571	0.339	0	0	ADAMTS1
0	1.08077	0.506	0.235	0	0	MRTFB
0	1.07978	0.211	0.038	0	0	EDN1
0	1.07751	0.86	0.723	0	0	CD9
0	1.07001	0.393	0.25	0	0	HSP70.1
0	1.06703	0.374	0.084	0	0	ITGA6
0	1.05954	0.559	0.307	0	0	ECE1
0	1.05808	0.542	0.345	0	0	TSC22D1
0	1.05724	0.386	0.062	0	0	ENSCHIG00000008848
0	1.05621	0.255	0.077	0	0	HEY1
0	1.05146	0.459	0.203	0	0	AFDN
0	1.04384	0.503	0.236	0	0	TJP1
0	1.04294	0.258	0.028	0	0	IFIT1
0	1.03709	0.297	0.013	0	0	HHEX
0	1.03384	0.429	0.088	0	0	MEF2C
0	1.02765	0.939	0.872	0	0	HSPB1
0	1.02132	0.349	0.054	0	0	LAYN
0	1.01523	0.377	0.053	0	0	CD200
0	1.01104	0.287	0.042	0	0	ENSCHIG00000009614
0	1.00819	0.378	0.17	0	0	MECOM
0	1.00683	0.259	0.044	0	0	TFPI
0	0.997461	0.492	0.184	0	0	DAB2
0	0.997262	0.488	0.261	0	0	TMOD3
0	0.997034	0.392	0.083	0	0	ENSCHIG00000009869
0	0.989984	0.69	0.457	0	0	CAVIN1
0	0.986029	0.525	0.232	0	0	CAVIN3
0	0.985296	0.327	0.065	0	0	CRYBG3
0	0.981893	0.389	0.078	0	0	ENSCHIG00000017732
0	0.976651	0.389	0.127	0	0	ADGRG1
0	0.974531	0.266	0.039	0	0	ARHGAP18
0	0.972649	0.612	0.33	0	0	PDK4
0	0.972458	0.595	0.33	0	0	ENSCHIG00000022058
0	0.971901	0.235	0.006	0	0	ENSCHIG00000001740
0	0.971439	0.331	0.068	0	0	MEOX2
0	0.970745	0.332	0.065	0	0	MTUS1
0	0.970374	0.402	0.212	0	0	JAG2
0	0.965391	0.252	0.034	0	0	ENSCHIG00000017677
0	0.961877	0.545	0.273	0	0	FOXO1
0	0.952572	0.255	0.025	0	0	MSX1
0	0.950493	0.251	0.026	0	0	ENSCHIG00000009277
0	0.939096	0.408	0.139	0	0	CPEB4
0	0.938991	0.301	0.01	0	0	USHBP1
0	0.936234	0.264	0.081	0	0	CHP2
0	0.926594	0.619	0.437	0	0	CALCOCO2
0	0.919864	0.376	0.111	0	0	CYTH1
0	0.909801	0.289	0.018	0	0	KANK3
0	0.908575	0.299	0.059	0	0	VWA5A
0	0.908282	0.355	0.095	0	0	RAPGEF2
0	0.907002	0.532	0.383	0	0	CDKN1A
0	0.904174	0.267	0.01	0	0	TM4SF18
0	0.902462	0.377	0.109	0	0	PLCB1
0	0.901836	0.613	0.446	0	0	MTCH1
0	0.895307	0.488	0.3	0	0	ENSCHIG00000023562
0	0.894869	0.426	0.223	0	0	BAZ1A
0	0.893334	0.313	0.074	0	0	ENSCHIG00000025388
0	0.89041	0.377	0.129	0	0	ST6GALNAC4
0	0.889333	0.287	0.024	0	0	CAVIN2
0	0.887023	0.6	0.435	0	0	NFKBIZ
0	0.885407	0.53	0.329	0	0	LUZP1
0	0.885023	0.299	0.047	0	0	SEC14L1
0	0.883119	0.298	0.031	0	0	ENSCHIG00000018153
0	0.874772	0.336	0.101	0	0	ITPR2
0	0.871323	0.282	0.02	0	0	APOLD1
0	0.86834	0.482	0.282	0	0	IL6ST
0	0.867394	0.644	0.53	0	0	ENSCHIG00000023303
0	0.866273	0.18	0.005	0	0	ENSCHIG00000001661
0	0.862899	0.326	0.138	0	0	FZD6
0	0.859011	0.471	0.236	0	0	MAPK3
0	0.857031	0.499	0.286	0	0	TPM3
0	0.854937	0.316	0.103	0	0	COL4A2
0	0.854183	0.387	0.171	0	0	PTPRG
0	0.851694	0.433	0.262	0	0	JAG1
0	0.845601	0.504	0.251	0	0	ADGRL2
0	0.845358	0.232	0.047	0	0	PTPRE
0	0.843885	0.377	0.16	0	0	ACOT7
0	0.839576	0.427	0.212	0	0	GRASP
0	0.836346	0.444	0.231	0	0	PXDN
0	0.831917	0.278	0.031	0	0	ENSCHIG00000006887
0	0.829463	0.361	0.148	0	0	TRIM47
0	0.829245	0.312	0.079	0	0	MANSC1
0	0.825351	0.811	0.753	0	0	H2AFZ
0	0.821996	0.594	0.434	0	0	NFKBIA
0	0.818697	0.526	0.279	0	0	ADIRF
0	0.81796	0.975	0.942	0	0	ENSCHIG00000011782
0	0.810022	0.476	0.262	0	0	REEP3
0	0.808691	0.298	0.062	0	0	TBC1D8
0	0.805563	0.571	0.431	0	0	BAG3
0	0.804973	0.483	0.285	0	0	IQGAP1
0	0.800265	0.757	0.593	0	0	ARPC1B
0	0.796021	0.744	0.573	0	0	DUSP1
0	0.791418	0.319	0.07	0	0	CD40
0	0.79109	0.124	0.009	0	0	DNASE1L3
0	0.789652	0.24	0.009	0	0	ENSCHIG00000001685
0	0.789559	0.411	0.148	0	0	TCF4
0	0.789361	0.266	0.02	0	0	RASIP1
0	0.78663	0.285	0.087	0	0	SAMD9
0	0.781137	0.419	0.189	0	0	PDLIM5
0	0.781114	0.84	0.733	0	0	GPX1
0	0.780474	0.372	0.13	0	0	RASAL2
0	0.779768	0.453	0.273	0	0	MACF1
0	0.778874	0.244	0.014	0	0	SEMA6B
0	0.77882	0.432	0.211	0	0	SLC43A3
0	0.77817	0.391	0.127	0	0	CSGALNACT1
0	0.776782	0.434	0.217	0	0	ENSCHIG00000006587
0	0.776152	0.381	0.212	0	0	ECM1
0	0.772258	0.24	0.046	0	0	ENSCHIG00000021021
0	0.766057	0.252	0.031	0	0	NOSTRIN
0	0.762596	0.645	0.515	0	0	GADD45A
0	0.761389	0.338	0.125	0	0	LIFR
0	0.755025	0.45	0.286	0	0	PLGRKT
0	0.752262	0.348	0.142	0	0	PLCG1
0	0.751822	0.597	0.468	0	0	JMJD1C
0	0.751081	0.488	0.312	0	0	KLF13
0	0.748461	0.38	0.176	0	0	HK1
0	0.746753	0.367	0.157	0	0	PNPLA2
0	0.742161	0.157	0.02	0	0	IFIT2
0	0.7405	0.449	0.268	0	0	CD2AP
0	0.738738	0.222	0.011	0	0	RAPGEF4
0	0.736875	0.307	0.047	0	0	PSMB8
0	0.735403	0.213	0.02	0	0	IL33
0	0.731499	0.411	0.191	0	0	CLIC4
0	0.720919	0.328	0.039	0	0	LAPTM5
0	0.719792	0.581	0.418	0	0	C9orf3
0	0.71799	0.358	0.182	0	0	PKP4
0	0.715035	0.406	0.205	0	0	TNS2
0	0.713547	0.32	0.106	0	0	SLC12A2
0	0.71125	0.339	0.15	0	0	TPD52
0	0.71072	0.347	0.139	0	0	TRIB2
0	0.699442	0.844	0.798	0	0	TMBIM6
0	0.697852	0.786	0.718	0	0	HSPA8
0	0.695834	0.869	0.825	0	0	RABAC1
0	0.694438	0.212	0.003	0	0	ENSCHIG00000023972
0	0.691095	0.399	0.216	0	0	TRAF6
0	0.690108	0.28	0.066	0	0	PLCB4
0	0.689477	0.286	0.08	0	0	CDC42EP3
0	0.687582	0.528	0.404	0	0	CLDND1
0	0.682889	0.293	0.086	0	0	TSPAN12
0	0.680835	0.731	0.669	0	0	DNAJA1
0	0.678603	0.324	0.161	0	0	MYH9
0	0.673496	0.252	0.041	0	0	ELK3
0	0.670863	0.231	0.05	0	0	ENSCHIG00000010101
0	0.67028	0.252	0.061	0	0	FRMD4B
0	0.669262	0.328	0.112	0	0	ENSCHIG00000008333
0	0.664648	0.483	0.283	0	0	RDX
0	0.663537	0.396	0.217	0	0	APP
0	0.662855	0.336	0.143	0	0	PPFIBP1
0	0.662035	0.436	0.257	0	0	REL
0	0.661681	0.261	0.077	0	0	GBP5
0	0.659815	0.279	0.107	0	0	RIOK3
0	0.655957	0.238	0.055	0	0	BDKRB2
0	0.655576	0.406	0.228	0	0	OSTF1
0	0.655567	0.263	0.128	0	0	IL6
0	0.654371	0.37	0.185	0	0	FNBP1L
0	0.651393	0.181	0.003	0	0	FAM124B
0	0.644676	0.42	0.236	0	0	UACA
0	0.641564	0.364	0.207	0	0	HMOX1
0	0.633837	0.289	0.132	0	0	SLC12A7
0	0.633197	0.308	0.121	0	0	PPP2R5A
0	0.632879	0.198	0.023	0	0	THSD1
0	0.630059	0.468	0.326	0	0	PAK2
0	0.629409	0.223	0.027	0	0	DOCK4
0	0.628267	0.208	0.027	0	0	NOV
0	0.628233	0.53	0.393	0	0	EFR3A
0	0.623244	0.355	0.215	0	0	OTUD4
0	0.6208	0.181	0.019	0	0	EGFL7
0	0.619184	0.225	0.047	0	0	MX1
0	0.618689	0.231	0.052	0	0	PLXNA2
0	0.617266	0.208	0.023	0	0	ENSCHIG00000015779
0	0.616779	0.239	0.064	0	0	COL15A1
0	0.615821	0.214	0.032	0	0	FAM13C
0	0.612702	0.33	0.188	0	0	N4BP1
0	0.609953	0.213	0.018	0	0	PPP1R16B
0	0.609706	0.284	0.128	0	0	CEMIP2
0	0.609172	0.29	0.134	0	0	PIK3C2A
0	0.605445	0.132	0.026	0	0	ENSCHIG00000011095
0	0.605153	0.233	0.077	0	0	IRF7
0	0.604222	0.295	0.117	0	0	TSPAN9
0	0.602171	0.174	0.007	0	0	CCM2L
0	0.602089	0.167	0.012	0	0	GATA2
0	0.595788	0.211	0.012	0	0	CLEC1A
0	0.589923	0.173	0.005	0	0	ZNF366
0	0.587932	0.45	0.301	0	0	ELF2
0	0.586471	0.262	0.087	0	0	CEP85L
0	0.58528	0.207	0.026	0	0	SLC16A11
0	0.580719	0.252	0.11	0	0	WARS
0	0.578223	0.192	0.027	0	0	ELOVL7
0	0.577062	0.208	0.018	0	0	ELMO1
0	0.577015	0.418	0.189	0	0	ALCAM
0	0.574203	0.356	0.198	0	0	CYFIP1
0	0.574109	0.168	0.003	0	0	ENSCHIG00000012479
0	0.571628	0.283	0.139	0	0	DLL1
0	0.565222	0.166	0.004	0	0	ENSCHIG00000000735
0	0.562958	0.219	0.036	0	0	ENSCHIG00000011730
0	0.561456	0.274	0.104	0	0	SERINC3
0	0.560976	0.475	0.317	0	0	GLS
0	0.558614	0.178	0.016	0	0	SLC39A8
0	0.558219	0.214	0.038	0	0	EHD4
0	0.557244	0.248	0.076	0	0	TINAGL1
0	0.552085	0.311	0.163	0	0	SLC44A2
0	0.551354	0.163	0.008	0	0	ENSCHIG00000013289
0	0.544403	0.314	0.15	0	0	GRAMD1A
0	0.539254	0.242	0.074	0	0	CTTNBP2NL
0	0.538598	0.173	0.008	0	0	MMRN2
0	0.53623	0.186	0.02	0	0	ENSCHIG00000019932
0	0.53586	0.278	0.113	0	0	TSPAN5
0	0.534377	0.259	0.118	0	0	CHD7
0	0.533612	0.307	0.148	0	0	TANC1
0	0.527756	0.177	0.021	0	0	ENSCHIG00000018922
0	0.527341	0.266	0.13	0	0	FAM135A
0	0.525064	0.318	0.163	0	0	SH3GLB1
0	0.522455	0.228	0.054	0	0	GCH1
0	0.519177	0.247	0.116	0	0	DNAJB4
0	0.514228	0.223	0.05	0	0	CASP8
0	0.513803	0.235	0.067	0	0	TMCC3
0	0.510801	0.25	0.103	0	0	ADAM10
0	0.510601	0.201	0.046	0	0	ATP8B1
0	0.506045	0.353	0.196	0	0	FEZ2
0	0.506023	0.215	0.062	0	0	EPAS1
0	0.505275	0.154	0.008	0	0	ST8SIA4
0	0.500999	0.194	0.036	0	0	SNRK
0	0.500947	0.697	0.38	0	0	KLF2
0	0.49882	0.144	0.004	0	0	ADGRF5
0	0.49822	0.231	0.067	0	0	ENSCHIG00000024459
0	0.498106	0.175	0.02	0	0	JCAD
0	0.497636	0.17	0.039	0	0	CMTM8
0	0.497054	0.137	0.01	0	0	DPP4
0	0.496031	0.154	0.002	0	0	CDH5
0	0.493093	0.131	0.016	0	0	ATP2A3
0	0.491054	0.298	0.149	0	0	BNIP2
0	0.490447	0.227	0.082	0	0	ENSCHIG00000007736
0	0.490123	0.238	0.09	0	0	CCDC85B
0	0.479018	0.259	0.123	0	0	ITSN2
0	0.475411	0.16	0.021	0	0	BCAR3
0	0.472699	0.195	0.036	0	0	ADAMTS9
0	0.469777	0.149	0.007	0	0	ENSCHIG00000005368
0	0.469662	0.249	0.117	0	0	STAP2
0	0.468776	0.274	0.127	0	0	BCAR1
0	0.468598	0.24	0.081	0	0	TTLL7
0	0.466402	0.142	0.006	0	0	BCL6B
0	0.463539	0.317	0.137	0	0	TACC1
0	0.463323	0.189	0.048	0	0	ENSCHIG00000021641
0	0.460905	0.153	0.017	0	0	IFIT3
0	0.456912	0.192	0.055	0	0	ZNF521
0	0.455238	0.202	0.087	0	0	SAMHD1
0	0.453186	0.3	0.151	0	0	NMI
0	0.452951	0.238	0.103	0	0	ARHGEF12
0	0.452459	0.198	0.056	0	0	ENPP2
0	0.450254	0.306	0.146	0	0	ANO6
0	0.449199	0.147	0.01	0	0	FAM167B
0	0.435723	0.367	0.18	0	0	ZEB1
0	0.432433	0.157	0.019	0	0	PARP14
0	0.432048	0.183	0.043	0	0	PIEZO1
0	0.427117	0.188	0.042	0	0	DNAJC12
0	0.425467	0.249	0.113	0	0	PLSCR4
0	0.423789	0.148	0.017	0	0	PTPRM
0	0.420238	0.141	0.023	0	0	ENSCHIG00000024488
0	0.419258	0.204	0.041	0	0	TNFRSF1B
0	0.418678	0.143	0.007	0	0	ENSCHIG00000015200
0	0.418423	0.261	0.126	0	0	FKBP5
0	0.418045	0.169	0.057	0	0	CTNNAL1
0	0.411889	0.244	0.106	0	0	RAP1B
0	0.409602	0.122	0.01	0	0	MYRIP
0	0.409356	0.13	0.021	0	0	HLX
0	0.406516	0.248	0.119	0	0	ASAP1
0	0.406376	0.206	0.079	0	0	SLC9A1
0	0.406362	0.163	0.049	0	0	RCAN1
0	0.405656	0.122	0.004	0	0	TEK
0	0.405154	0.159	0.038	0	0	PRAG1
0	0.404812	0.12	0.008	0	0	ENSCHIG00000010163
0	0.404169	0.183	0.069	0	0	PAM
0	0.403117	0.222	0.076	0	0	C19orf66
0	0.40207	0.147	0.016	0	0	FGR
0	0.40168	0.257	0.085	0	0	EFHD1
0	0.398709	0.209	0.083	0	0	CPNE2
0	0.396368	0.17	0.031	0	0	RALB
0	0.395696	0.142	0.016	0	0	ARHGEF28
0	0.390705	0.16	0.046	0	0	PGM2
0	0.386605	0.26	0.111	0	0	PHLDB2
0	0.385757	0.167	0.05	0	0	KIFC3
0	0.385557	0.202	0.06	0	0	ITGA1
0	0.385452	0.192	0.067	0	0	SDCBP
0	0.382997	0.25	0.119	0	0	PACSIN2
0	0.381217	0.181	0.058	0	0	VAMP5
0	0.380681	0.168	0.057	0	0	PDE9A
0	0.379794	0.228	0.088	0	0	ENSCHIG00000004169
0	0.378866	0.235	0.093	0	0	CXCR4
0	0.372323	0.147	0.025	0	0	ACVRL1
0	0.370335	0.167	0.058	0	0	BCAM
0	0.368788	0.126	0.013	0	0	ENSCHIG00000019256
0	0.368083	0.177	0.069	0	0	MCC
0	0.367697	0.168	0.049	0	0	ARRDC3
0	0.365009	0.163	0.047	0	0	DTX3L
0	0.364324	0.22	0.099	0	0	CPT1A
0	0.363422	0.136	0.016	0	0	PLEKHG1
0	0.362246	0.142	0.044	0	0	DYRK3
0	0.359658	0.197	0.077	0	0	CNN3
0	0.359361	0.189	0.08	0	0	CCDC28B
0	0.355608	0.116	0.03	0	0	ALPL
0	0.351092	0.132	0.024	0	0	DOCK6
0	0.350537	0.132	0.017	0	0	RARRES1
0	0.349119	0.13	0.03	0	0	SIGIRR
0	0.349051	0.166	0.058	0	0	MBNL2
0	0.348642	0.106	0.006	0	0	EXOC3L1
0	0.345877	0.13	0.02	0	0	DOCK9
0	0.344873	0.181	0.062	0	0	PLPP1
0	0.344734	0.192	0.071	0	0	PEAK1
0	0.344508	0.244	0.11	0	0	TGFB1
0	0.343984	0.14	0.024	0	0	CDK17
0	0.33811	0.152	0.035	0	0	PTPN12
0	0.337636	0.114	0.013	0	0	ENSCHIG00000020926
0	0.336092	0.116	0.027	0	0	LXN
0	0.33559	0.125	0.027	0	0	EXOC6
0	0.333208	0.194	0.079	0	0	AKIRIN2
0	0.332846	0.151	0.045	0	0	BHLHE41
0	0.329244	0.174	0.057	0	0	SH2D3C
0	0.328485	0.114	0.008	0	0	ENSCHIG00000004619
0	0.31964	0.139	0.028	0	0	LRCH1
0	0.318156	0.126	0.028	0	0	MMD
0	0.317124	0.131	0.025	0	0	MYO1E
0	0.3107	0.134	0.021	0	0	NEDD4
0	0.309525	0.191	0.075	0	0	TXNRD1
0	0.306081	0.118	0.019	0	0	TM6SF1
0	0.305007	0.126	0.021	0	0	EVA1C
0	0.30353	0.104	0.012	0	0	ENSCHIG00000016844
0	0.302056	0.15	0.056	0	0	ENSCHIG00000026580
0	0.300489	0.126	0.019	0	0	KIT
0	0.299184	0.142	0.041	0	0	ARSK
0	0.297314	0.129	0.024	0	0	PELI1
0	0.28809	0.136	0.047	0	0	SLC27A5
0	0.282699	0.553	0.323	0	0	ADAMTS4
0	0.279732	0.132	0.044	0	0	MTMR12
0	0.274078	0.101	0.017	0	0	HS3ST2
0	0.27366	0.11	0.031	0	0	VAV3
0	0.272186	0.109	0.015	0	0	CADPS2
0	0.261389	0.12	0.031	0	0	ENSCHIG00000021504
0	0.259176	0.127	0.042	0	0	EIF2AK2
0	0.255812	0.126	0.026	0	0	TEAD4
0	0.255618	0.148	0.034	0	0	GMFG
0	0.255121	0.128	0.041	0	0	ZNFX1
0	0.253512	0.132	0.041	0	0	RHOB
0	0.251652	0.103	0.028	0	0	ENSCHIG00000011083
0	0.250882	0.119	0.027	0	0	LRRC8C
0	0.250495	0.101	0.03	0	0	ENSCHIG00000012025
0	0.250074	0.109	0.027	0	0	PQLC3
8.79e-304	0.371048	0.31	0.162	1.75e-299	0	ENSCHIG00000021774
1.07e-303	0.679112	0.544	0.408	2.13e-299	0	TIPARP
8.57e-303	0.45309	0.298	0.16	1.71e-298	0	RNF38
2.96e-301	0.305291	0.153	0.059	5.9e-297	0	NFE2L1
2.45e-300	0.329266	0.121	0.041	4.88e-296	0	ENSCHIG00000009835
1.34e-299	0.573532	0.397	0.254	2.67e-295	0	ERBIN
1.52e-296	0.275604	0.149	0.056	3.04e-292	0	CD302
3.43e-296	0.277325	0.136	0.049	6.83e-292	0	IFI35
1.07e-295	0.615591	0.575	0.47	2.13e-291	0	ENSCHIG00000007393
2.19e-294	0.292853	0.15	0.057	4.36e-290	0	FOXN2
4.12e-294	0.493773	0.238	0.119	8.21e-290	0	EOGT
6.24e-289	0.311679	0.167	0.069	1.24e-284	0	CPNE8
5.13e-288	0.469215	0.298	0.165	1.02e-283	0	SPTLC2
8.84e-288	0.490553	0.205	0.095	1.76e-283	0	NFKBID
1.67e-287	0.486812	0.397	0.247	3.32e-283	0	LBR
6.56e-285	0.353893	0.205	0.094	1.31e-280	0	IRF2
2.33e-279	0.562701	0.42	0.277	4.63e-275	0	COTL1
7.89e-279	0.288367	0.136	0.05	1.57e-274	0	PALD1
1.76e-278	0.322865	0.21	0.097	3.51e-274	0	LY96
6.91e-278	0.535587	0.387	0.252	1.38e-273	0	ENSCHIG00000012183
2.91e-277	0.516884	0.372	0.232	5.79e-273	0	CCDC50
7.03e-277	0.368626	0.209	0.096	1.4e-272	0	HOXB2
4.69e-275	0.329158	0.195	0.089	9.33e-271	0	SNX16
1.3e-274	0.494591	0.341	0.205	2.6e-270	0	MACO1
5.5e-274	0.395002	0.277	0.147	1.09e-269	0	DNASE2
8.93e-274	0.285936	0.163	0.068	1.78e-269	0	SP110
3.45e-272	0.797433	0.246	0.129	6.88e-268	0	ENSCHIG00000019796
5.86e-271	0.343311	0.172	0.075	1.17e-266	0	ENSCHIG00000023062
3.91e-270	0.275073	0.125	0.045	7.79e-266	0	ADAM17
3.81e-269	0.383372	0.282	0.152	7.59e-265	0	CFLAR
1.99e-268	0.310199	0.182	0.081	3.96e-264	0	ZFYVE1
2.09e-268	0.556304	0.458	0.327	4.15e-264	0	CAPZA2
1.42e-267	0.597867	0.504	0.388	2.83e-263	0	ENSCHIG00000021197
1.66e-266	0.399549	0.825	0.83	3.31e-262	0	ATF4
4.04e-265	0.491359	0.309	0.179	8.04e-261	0	ENSCHIG00000014629
3.36e-263	0.511207	0.369	0.237	6.7e-259	0	GLTP
3.59e-263	0.508116	0.357	0.223	7.14e-259	0	TET2
2.66e-262	0.312997	0.145	0.059	5.29e-258	0	ERAP2
2.26e-260	0.255176	0.231	0.113	4.5e-256	0	ENSCHIG00000026593
3.22e-260	0.584092	0.542	0.432	6.42e-256	0	TAX1BP1
4.36e-257	0.379207	0.718	0.6	8.68e-253	0	ID1
3.21e-255	0.308478	0.202	0.095	6.4e-251	0	GABARAPL1
8.74e-255	0.52757	0.432	0.297	1.74e-250	0	NCKAP1
1.62e-253	0.348475	0.903	0.886	3.22e-249	0	DDX5
2.78e-252	0.514113	0.964	0.962	5.54e-248	0	HSP90AA1
2.74e-250	0.347326	0.151	0.064	5.46e-246	0	CCDC88C
3e-249	0.512631	0.287	0.165	5.98e-245	0	ITPRID2
3.22e-249	0.408777	0.301	0.172	6.42e-245	0	ZMIZ1
1.44e-246	0.266976	0.146	0.06	2.86e-242	0	DENND4A
3.37e-246	0.38235	0.224	0.114	6.72e-242	0	ULK1
1.11e-243	0.478206	0.254	0.141	2.21e-239	0	ENSCHIG00000022271
2.24e-243	0.562002	0.58	0.482	4.46e-239	0	BTG3
7.75e-243	0.471572	0.288	0.166	1.54e-238	0	PELO
3.88e-241	0.454422	0.352	0.221	7.73e-237	0	NQO2
2.6e-240	0.297334	0.209	0.101	5.17e-236	0	MYO1B
3.32e-239	0.319137	0.173	0.078	6.62e-235	0	ENSCHIG00000020774
7.96e-238	0.493252	0.304	0.181	1.58e-233	0	B4GALT5
1.1e-237	0.321309	0.183	0.087	2.18e-233	0	ACSL5
8.73e-235	0.334623	0.125	0.05	1.74e-230	0	CREG2
2.24e-234	0.350509	0.183	0.088	4.46e-230	0	KLF6
6.61e-234	0.443131	0.261	0.147	1.32e-229	0	ST3GAL1
7.23e-233	0.438124	0.296	0.176	1.44e-228	0	UBAP2
1.22e-232	0.542772	0.557	0.465	2.44e-228	0	PSME2
1.51e-232	0.47694	0.332	0.208	3.02e-228	0	RB1CC1
3.54e-231	0.270383	0.149	0.065	7.05e-227	0	PHACTR4
5.66e-229	0.442244	0.388	0.251	1.13e-224	0	PLEKHO1
2.75e-228	0.326958	0.181	0.086	5.48e-224	0	SH3BP4
8.33e-223	0.305596	0.208	0.105	1.66e-218	0	ARSB
1.27e-222	0.282576	0.18	0.083	2.53e-218	0	ENSCHIG00000023311
2.6e-222	0.280838	0.148	0.065	5.19e-218	0	TRIM24
6.56e-220	0.377219	0.264	0.15	1.31e-215	0	HOOK3
1.06e-219	0.438404	0.295	0.174	2.11e-215	0	PKN1
2.28e-218	0.263168	0.157	0.071	4.55e-214	0	ENSCHIG00000017417
2.63e-218	0.351945	0.24	0.128	5.24e-214	0	CDC42BPA
4.18e-218	0.483234	0.457	0.333	8.32e-214	0	RNF130
7.14e-218	0.281444	0.162	0.074	1.42e-213	0	ENSCHIG00000018500
5.62e-216	0.422313	0.451	0.332	1.12e-211	0	ENSCHIG00000013044
1.46e-215	0.553882	0.529	0.43	2.91e-211	0	KTN1
1.14e-213	0.299731	0.22	0.115	2.28e-209	0	OPTN
7e-213	0.642729	0.537	0.457	1.4e-208	0	SLC3A2
9.83e-212	0.372816	0.225	0.121	1.96e-207	0	ZNF800
4.47e-211	0.542475	0.516	0.421	8.89e-207	0	RALA
1.44e-210	0.566785	0.573	0.493	2.87e-206	0	MRPL17
8.5e-210	0.442017	0.248	0.144	1.69e-205	0	FAM171A1
1.45e-208	0.357095	0.229	0.125	2.89e-204	0	YTHDC2
9.12e-207	0.538681	0.404	0.29	1.82e-202	0	CHD1
1.21e-206	0.294006	0.229	0.12	2.4e-202	0	LAMC1
1.59e-205	0.436263	0.38	0.255	3.17e-201	0	TRIP10
1.98e-205	0.536173	0.425	0.306	3.95e-201	0	BCL3
1.46e-204	0.38427	0.283	0.167	2.91e-200	0	SMAD7
1.07e-203	0.33565	0.214	0.11	2.13e-199	0	SYNE1
1.19e-200	0.300659	0.149	0.068	2.38e-196	0	GIT2
3.59e-200	0.406858	0.44	0.292	7.15e-196	0	IFI6
5.28e-198	0.336919	0.225	0.124	1.05e-193	0	FCHO2
6.18e-198	0.397474	0.272	0.162	1.23e-193	0	CARD19
3.08e-197	0.283366	0.187	0.095	6.12e-193	0	RIPK2
6.61e-197	0.500453	0.338	0.226	1.32e-192	0	CDKN1B
9.54e-197	0.398521	0.263	0.156	1.9e-192	0	MAN1A1
9.72e-195	0.26015	0.139	0.062	1.94e-190	0	PICALM
3.51e-194	0.388992	0.229	0.13	6.98e-190	0	ARHGEF1
7.18e-193	0.380305	0.691	0.67	1.43e-188	0	GABARAPL2
2.98e-192	0.42667	0.671	0.614	5.94e-188	0	ITGB1
1.99e-191	0.258486	0.158	0.076	3.96e-187	0	HIF1A
4.15e-191	0.487943	0.467	0.362	8.27e-187	0	ARID4B
4.57e-190	0.27957	0.191	0.099	9.1e-186	0	CCNT1
2.7e-187	0.503009	0.501	0.395	5.38e-183	0	ENSCHIG00000025428
4.26e-187	0.300851	0.142	0.066	8.48e-183	0	FLNB
2.56e-186	0.512745	0.376	0.261	5.11e-182	0	AGRN
3e-185	0.510206	0.573	0.517	5.97e-181	0	TXNL1
2.31e-184	0.298837	0.194	0.102	4.61e-180	0	HIVEP2
1.34e-183	0.454524	0.514	0.421	2.67e-179	0	ENSCHIG00000026673
7.69e-183	0.44211	0.395	0.284	1.53e-178	0	NR1H2
8.98e-183	0.415429	0.343	0.231	1.79e-178	0	ENSCHIG00000007316
1.14e-182	0.323678	0.197	0.106	2.27e-178	0	UMPS
2.62e-182	0.371567	0.258	0.153	5.22e-178	0	ARHGAP17
5.8e-182	0.285722	0.221	0.123	1.16e-177	0	MGAT2
2.02e-181	0.330611	0.234	0.133	4.02e-177	0	MAN2A1
5.94e-181	0.425416	0.875	0.882	1.18e-176	0	UBC
9.84e-180	0.516211	0.556	0.477	1.96e-175	0	NSD3
1.23e-179	0.41581	0.315	0.205	2.45e-175	0	NFKBIB
1.32e-178	0.472894	0.67	0.642	2.63e-174	0	TOP1
4.48e-178	0.512125	0.535	0.455	8.92e-174	0	KMT2E
4.12e-177	0.298728	0.17	0.086	8.2e-173	0	USP46
7.66e-177	0.492012	0.32	0.215	1.53e-172	0	SLC25A28
5.98e-174	0.451856	0.314	0.207	1.19e-169	0	SLC29A1
1.73e-173	0.301873	0.162	0.082	3.45e-169	0	MYO6
7.35e-173	0.468673	0.731	0.713	1.46e-168	0	SEC62
2.4e-172	0.268911	0.284	0.169	4.78e-168	0	RRAS
3.66e-171	0.3504	0.786	0.792	7.29e-167	0	YWHAB
4.56e-169	0.377269	0.351	0.237	9.07e-165	0	ZSWIM6
5.58e-169	0.528002	0.368	0.265	1.11e-164	0	SERPINB1
1.17e-168	0.272386	0.129	0.06	2.32e-164	0	TNFRSF6B
2.58e-166	0.323085	0.213	0.122	5.13e-162	0	ICA1
1.08e-164	0.498203	0.383	0.283	2.16e-160	0	ENSCHIG00000017907
8.75e-164	0.281129	0.856	0.845	1.74e-159	0	ZFP36L1
1.75e-163	0.374489	0.374	0.256	3.49e-159	0	PLOD3
3.78e-163	0.389779	0.385	0.275	7.53e-159	0	HIPK3
2.14e-161	0.554016	0.544	0.475	4.26e-157	0	ENSCHIG00000017707
2.27e-160	0.351949	0.24	0.145	4.52e-156	0	BTBD7
3.53e-160	0.433792	0.351	0.251	7.04e-156	0	NFE2L2
8.56e-160	0.395429	0.316	0.215	1.71e-155	0	UBE2K
1e-158	0.493662	0.398	0.294	1.99e-154	0	KIAA1551
3.81e-158	0.464045	0.608	0.547	7.6e-154	0	ENSCHIG00000010336
4.82e-158	0.452441	0.513	0.44	9.6e-154	0	SARAF
1.08e-156	0.398941	0.338	0.236	2.15e-152	0	PDCL
1.38e-154	0.362592	0.28	0.18	2.74e-150	0	RALGAPA1
2.21e-154	0.364441	0.275	0.177	4.4e-150	0	PLEKHA1
6.2e-154	0.330677	0.563	0.438	1.23e-149	0	MAP1B
2.57e-153	0.439219	0.298	0.201	5.11e-149	0	LONRF1
6.92e-153	0.292722	0.201	0.115	1.38e-148	0	AFF1
1.26e-152	0.301626	0.249	0.152	2.51e-148	0	RNF19A
1.36e-151	0.265545	0.206	0.119	2.72e-147	0	DDX39A
2.94e-151	0.392576	0.421	0.318	5.85e-147	0	SPAG9
2.97e-151	0.339235	0.236	0.144	5.92e-147	0	BIRC6
1.01e-150	0.517794	0.452	0.362	2.01e-146	0	NUDT14
3.28e-149	0.251116	0.16	0.084	6.54e-145	0	MBNL1
2.6e-147	0.371299	0.767	0.737	5.17e-143	0	YBX3
6.56e-146	0.368684	0.263	0.173	1.31e-141	0	LRRC1
1.94e-145	0.392565	0.568	0.494	3.86e-141	0	YWHAH
2.54e-144	0.39245	0.612	0.569	5.06e-140	0	MTPN
5.43e-144	0.298298	0.26	0.162	1.08e-139	0	PHACTR2
1.45e-143	0.410804	0.458	0.362	2.89e-139	0	BTG1
1.73e-143	0.424815	0.411	0.315	3.45e-139	0	ENSCHIG00000025314
3.66e-143	0.447738	0.161	0.089	7.3e-139	0	ENSCHIG00000024179
1.14e-142	0.385358	0.356	0.256	2.27e-138	0	MYL12A
2.61e-139	0.397562	0.407	0.31	5.2e-135	0	TMEM59
6.45e-138	0.456292	0.377	0.282	1.29e-133	0	SNTB2
1.69e-137	0.263627	0.186	0.106	3.37e-133	0	TRAM1
1.75e-137	0.349877	0.238	0.151	3.48e-133	0	FAM114A2
2.1e-137	0.254675	0.213	0.128	4.19e-133	0	HBEGF
1.11e-136	0.312169	0.241	0.153	2.21e-132	0	MINDY2
6.25e-135	0.53736	0.532	0.478	1.25e-130	0	TGIF1
1.53e-134	0.48606	0.492	0.409	3.05e-130	0	PIM3
3.29e-134	0.401523	0.352	0.256	6.56e-130	0	ENSCHIG00000023712
1.1e-133	0.297964	0.254	0.161	2.19e-129	0	MEF2A
1.16e-133	0.253454	0.261	0.168	2.3e-129	0	CPEB2
3.37e-133	0.257502	0.943	0.945	6.71e-129	0	ENSCHIG00000017807
2.83e-131	0.269072	0.252	0.162	5.63e-127	0	HPCAL1
3.26e-131	0.357843	0.504	0.425	6.5e-127	0	ROCK1
1.93e-129	0.322385	0.328	0.226	3.83e-125	0	CCPG1
3.17e-129	0.288114	0.376	0.258	6.31e-125	0	ENSCHIG00000020984
4.49e-129	0.322961	0.282	0.189	8.93e-125	0	ENSCHIG00000013412
1.4e-127	0.274414	0.763	0.781	2.78e-123	0	EIF4G2
3.11e-125	0.27583	0.243	0.156	6.2e-121	0	OSBPL8
3.74e-125	0.256116	0.224	0.137	7.45e-121	0	MRAS
5.93e-125	0.383064	0.266	0.18	1.18e-120	0	SEMA3F
1.41e-124	0.387554	0.333	0.237	2.8e-120	0	MAP7D1
2.01e-124	0.367091	0.22	0.14	4.01e-120	0	TMEM14A
2.03e-124	0.641055	0.68	0.634	4.03e-120	0	ENSCHIG00000010216
2.14e-124	0.259483	0.22	0.137	4.25e-120	0	GRB2
2.4e-124	0.28888	0.166	0.094	4.77e-120	0	KIAA1671
3.73e-124	0.442392	0.492	0.418	7.44e-120	0	NDFIP2
6.35e-123	0.320986	0.338	0.241	1.26e-118	0	DENND5A
6.32e-119	0.386892	0.639	0.612	1.26e-114	0	BZW1
2.84e-116	0.257406	0.196	0.12	5.66e-112	0	BTBD1
2.55e-114	0.289943	0.312	0.213	5.08e-110	0	TGFBR3
9.3e-114	0.277731	0.214	0.136	1.85e-109	0	NFAT5
1.43e-113	0.350822	0.267	0.183	2.86e-109	0	GNA11
1.91e-113	0.280381	0.197	0.122	3.8e-109	0	AHCTF1
6.03e-113	0.316927	0.514	0.415	1.2e-108	0	ENSCHIG00000018361
1.17e-112	0.372102	0.472	0.397	2.32e-108	0	LAPTM4A
1.96e-112	0.362519	0.633	0.626	3.9e-108	0	MTDH
1.32e-111	0.291693	0.153	0.088	2.62e-107	0	USP54
5.94e-111	0.302546	0.322	0.232	1.18e-106	0	AKAP13
6.26e-111	0.346362	0.367	0.275	1.25e-106	0	HM13
1.51e-109	0.286773	0.275	0.19	3e-105	0	RASA1
7.33e-109	0.289403	0.266	0.182	1.46e-104	0	WNK1
3.52e-108	0.287174	0.222	0.146	7.01e-104	0	ACTN4
8.67e-108	0.384176	0.351	0.271	1.73e-103	0	NGDN
2.51e-107	0.278398	0.762	0.768	5.01e-103	0	HSP90B1
2.88e-107	0.444255	0.466	0.384	5.74e-103	0	AHNAK
1.25e-105	0.348855	0.357	0.273	2.49e-101	0	PHF20L1
1.52e-105	0.390774	0.506	0.44	3.02e-101	0	ENSCHIG00000019989
2.51e-105	0.377078	0.379	0.301	4.99e-101	0	ENSCHIG00000025487
4.89e-105	0.396243	0.517	0.464	9.74e-101	0	ZNF326
4.95e-104	0.390843	0.533	0.469	9.85e-100	0	PSME1
8.41e-103	0.348852	0.366	0.283	1.67e-98	0	ENSCHIG00000000461
9.19e-102	0.276283	0.222	0.145	1.83e-97	0	SLC30A1
3.76e-101	0.369638	0.495	0.43	7.48e-97	0	ENSCHIG00000014185
5.04e-101	0.276407	0.264	0.182	1e-96	0	RBM18
1.7e-99	0.325771	0.305	0.223	3.39e-95	0	ATF7IP
2.16e-99	0.256259	0.199	0.129	4.31e-95	0	GNAI3
1.18e-98	0.295907	0.345	0.259	2.35e-94	0	ENSCHIG00000018633
2.52e-97	0.31053	0.606	0.552	5.01e-93	0	RRBP1
3.77e-97	0.375521	0.356	0.278	7.51e-93	0	COL4A3BP
6.12e-97	0.291051	0.386	0.297	1.22e-92	0	ENSCHIG00000009601
1.89e-96	0.257012	0.246	0.166	3.77e-92	0	STX2
2.75e-96	0.438132	0.522	0.468	5.48e-92	0	ARGLU1
2.44e-94	0.338045	0.675	0.629	4.86e-90	0	ENSCHIG00000023424
2.78e-93	0.427973	0.189	0.125	5.54e-89	0	PRCP
7.04e-93	0.294578	0.276	0.199	1.4e-88	0	ENSCHIG00000006134
1.65e-91	0.28441	0.201	0.133	3.28e-87	0	OSGIN1
9.7e-90	0.361717	0.297	0.224	1.93e-85	0	COX17
1.8e-89	0.323996	0.309	0.233	3.59e-85	0	CTNNA1
5.83e-88	0.338244	0.272	0.2	1.16e-83	0	IFT20
2.32e-87	0.372458	0.507	0.46	4.63e-83	0	ENSCHIG00000024357
2.41e-87	0.27311	0.36	0.283	4.79e-83	0	NET1
2.72e-87	0.468653	0.485	0.426	5.42e-83	0	HSPH1
1.48e-86	0.446724	0.492	0.449	2.94e-82	0	GSPT1
1.3e-85	0.277782	0.227	0.158	2.6e-81	0	PPP2R2A
2.22e-85	0.272217	0.321	0.24	4.42e-81	0	GADD45G
2.24e-85	0.390236	0.575	0.524	4.45e-81	0	ENSCHIG00000021684
7.27e-83	0.277559	0.212	0.145	1.45e-78	0	HLTF
1.02e-82	0.307863	0.563	0.504	2.02e-78	0	SRI
8.27e-82	0.467029	0.478	0.417	1.65e-77	0	CCNL1
3.45e-81	0.314958	0.27	0.199	6.86e-77	0	SPEN
8.29e-81	0.29093	0.361	0.283	1.65e-76	0	ENSCHIG00000013116
5.85e-79	0.2614	0.131	0.08	1.17e-74	0	FRMD8
2.95e-78	0.38839	0.396	0.336	5.88e-74	0	TARS
2.12e-76	0.317014	0.635	0.63	4.23e-72	0	SF3B1
3.59e-76	0.302725	0.301	0.229	7.16e-72	0	ENSCHIG00000007372
1.31e-75	0.333253	0.547	0.501	2.61e-71	0	UBXN1
3.05e-73	0.374789	0.418	0.356	6.07e-69	0	SOX4
5.34e-73	0.308519	0.312	0.243	1.06e-68	0	SCAF11
1.56e-70	0.341165	0.381	0.321	3.1e-66	0	XRN2
3.83e-69	0.257212	0.317	0.246	7.63e-65	0	USP34
5.48e-69	0.28482	0.723	0.755	1.09e-64	0	EIF5
7.03e-68	0.279668	0.287	0.219	1.4e-63	0	CENPC
1.56e-66	0.271001	0.275	0.21	3.1e-62	0	ENDOD1
1.05e-65	0.258143	0.266	0.199	2.09e-61	0	ENSCHIG00000022217
6.23e-65	0.258905	0.23	0.167	1.24e-60	0	APC
3.54e-64	0.313024	0.465	0.418	7.05e-60	0	ENSCHIG00000015198
4.65e-64	0.322863	0.462	0.408	9.26e-60	0	CLK1
5.4e-64	0.28523	0.342	0.279	1.08e-59	0	ENSCHIG00000011585
1.06e-63	0.271028	0.292	0.229	2.1e-59	0	PPP6C
1.14e-62	0.265775	0.336	0.27	2.28e-58	0	TRIP12
3.41e-62	0.274934	0.266	0.206	6.8e-58	0	ENSCHIG00000011849
1.43e-61	0.250806	0.241	0.18	2.84e-57	0	ENSCHIG00000026751
3.91e-61	0.339729	0.444	0.391	7.78e-57	0	ATP1A1
4.41e-61	0.277356	0.301	0.23	8.78e-57	0	JAM3
2.2e-60	0.316608	0.386	0.33	4.39e-56	0	PTGES3
4.17e-60	0.324893	0.535	0.503	8.31e-56	0	PUM1
4.04e-59	0.261494	0.328	0.263	8.04e-55	0	NUFIP2
8.03e-59	0.267607	0.243	0.182	1.6e-54	0	CAMSAP2
8.47e-58	0.275856	0.178	0.127	1.69e-53	0	TP53BP2
2.29e-57	0.304827	0.457	0.408	4.56e-53	0	SNX3
7.25e-56	0.335567	0.423	0.372	1.44e-51	0	CCS
2.84e-55	0.252605	0.232	0.176	5.66e-51	0	SLK
6.27e-54	0.38746	0.464	0.42	1.25e-49	0	PNRC1
1.04e-53	0.5242	0.126	0.084	2.07e-49	0	ENSCHIG00000021886
1.43e-52	0.272008	0.597	0.583	2.86e-48	0	MCL1
4.01e-52	0.272359	0.346	0.288	7.98e-48	0	HECTD1
1.07e-51	0.585276	0.177	0.13	2.12e-47	0	NPPC
1.89e-51	0.287543	0.53	0.505	3.77e-47	0	ENSCHIG00000000248
5.28e-51	0.252141	0.283	0.221	1.05e-46	0	COLGALT1
2.43e-50	0.278219	0.478	0.438	4.83e-46	0	DDX6
4.41e-50	0.263846	0.672	0.687	8.78e-46	0	BRD2
8.19e-50	0.290174	0.366	0.313	1.63e-45	0	FAM120A
1.63e-49	0.310011	0.515	0.494	3.24e-45	0	PSMA5
2.75e-49	0.280405	0.401	0.346	5.48e-45	0	ZNF644
5.4e-49	0.29573	0.342	0.288	1.08e-44	0	RNASEK
6.42e-49	0.290115	0.603	0.605	1.28e-44	0	ENY2
2.27e-47	0.265327	0.368	0.315	4.51e-43	0	DDX18
3.03e-47	0.256517	0.445	0.397	6.05e-43	0	ENSCHIG00000020087
1.43e-46	0.261652	0.309	0.255	2.85e-42	0	DYNC1H1
2.28e-46	0.299692	0.428	0.384	4.55e-42	0	ENSCHIG00000007021
1.94e-45	0.285753	0.434	0.398	3.87e-41	0	ENSCHIG00000013246
2.35e-44	0.257678	0.58	0.559	4.69e-40	0	CTSV
5.06e-44	0.297738	0.566	0.548	1.01e-39	0	2022-09-02
8.3e-44	0.251322	0.296	0.246	1.65e-39	0	CEBPZ
2.69e-43	0.293881	0.389	0.347	5.36e-39	0	ENSCHIG00000027173
7.42e-42	0.255853	0.244	0.195	1.48e-37	0	AKAP11
1.61e-40	0.254034	0.539	0.525	3.2e-36	0	KIF5B
2.99e-40	0.287682	0.506	0.484	5.95e-36	0	YY1
4.64e-40	0.275238	0.5	0.484	9.24e-36	0	RYBP
2.6e-39	0.253261	0.318	0.269	5.18e-35	0	YWHAG
1.2e-38	0.277892	0.357	0.318	2.39e-34	0	NIFK
5.4e-38	0.323028	0.165	0.127	1.08e-33	0	MLEC
1.24e-37	0.328335	0.499	0.487	2.47e-33	0	GOLGA4
1.75e-36	0.284748	0.357	0.318	3.48e-32	0	HSDL2
3.92e-36	0.344147	0.379	0.346	7.81e-32	0	NAA38
6.04e-35	0.314557	0.358	0.321	1.2e-30	0	ENSCHIG00000014915
2.18e-30	0.518337	0.334	0.296	4.35e-26	0	S100A4
2.35e-30	0.266767	0.459	0.427	4.68e-26	0	EIF5B
8.59e-30	0.335396	0.325	0.285	1.71e-25	0	MCFD2
1.61e-29	0.266491	0.17	0.134	3.2e-25	0	PLIN2
2.82e-29	0.278947	0.425	0.395	5.61e-25	0	ARL2-SNX15
1.01e-25	0.257742	0.352	0.322	2.01e-21	0	GGNBP2
4.21e-23	0.370583	0.292	0.259	8.39e-19	0	RF00017.7
3.34e-22	0.263496	0.255	0.221	6.66e-18	0	GPCPD1
9.63e-22	0.293339	0.536	0.549	1.92e-17	0	ENSCHIG00000023667
4.13e-18	0.250098	0.434	0.417	8.23e-14	0	CYBA
0	2.40883	0.727	0.077	0	1	KRT8
0	2.2439	0.986	0.488	0	1	IGFBP2
0	1.91551	0.877	0.212	0	1	KRT7
0	1.79652	0.945	0.535	0	1	IGFBP6
0	1.50226	0.71	0.119	0	1	ENSCHIG00000015151
0	1.35769	0.922	0.28	0	1	KRT15
0	1.34229	0.706	0.174	0	1	SOX2
0	1.33704	0.849	0.296	0	1	KLF5
0	1.24757	0.687	0.3	0	1	CA3
0	1.20327	0.687	0.172	0	1	IRX3
0	1.11891	0.725	0.265	0	1	S100A4
0	1.11532	0.52	0.069	0	1	ARHGEF19
0	1.10485	0.693	0.238	0	1	CADM1
0	1.09688	0.561	0.303	0	1	KRT14
0	1.08897	0.789	0.28	0	1	C4orf48
0	1.05722	0.589	0.189	0	1	DSP
0	1.02594	0.757	0.36	0	1	KRT17
0	1.02506	0.708	0.235	0	1	FGFR2
0	1.01715	0.948	0.506	0	1	S100A2
0	1.00159	0.619	0.164	0	1	TFAP2A
0	0.974129	0.598	0.313	0	1	BHLHE40
0	0.961479	0.709	0.274	0	1	HSPB8
0	0.940813	0.572	0.141	0	1	FERMT1
0	0.905232	0.938	0.841	0	1	ENSCHIG00000010444
0	0.885519	0.448	0.089	0	1	KLHDC8A
0	0.864766	0.63	0.196	0	1	JAG2
0	0.843594	0.67	0.214	0	1	TMPRSS11A
0	0.840578	0.541	0.154	0	1	COL17A1
0	0.835592	0.374	0.067	0	1	ENSCHIG00000005122
0	0.816389	0.4	0.043	0	1	ENSCHIG00000023628
0	0.811535	0.457	0.105	0	1	BCL11B
0	0.767295	0.606	0.229	0	1	DDR1
0	0.761337	0.505	0.134	0	1	AJUBA
0	0.759842	0.626	0.238	0	1	KRT19
0	0.758906	0.567	0.165	0	1	HSD17B2
0	0.753127	0.613	0.233	0	1	PDLIM4
0	0.740073	0.552	0.207	0	1	HOXC4
0	0.731718	0.735	0.346	0	1	ISYNA1
0	0.72056	0.565	0.237	0	1	ENSCHIG00000024885
0	0.719882	0.587	0.206	0	1	ANK3
0	0.713341	0.232	0.094	0	1	GPRC5A
0	0.713291	0.978	0.957	0	1	ENSCHIG00000013646
0	0.687672	0.902	0.407	0	1	ENSCHIG00000023823
0	0.684739	0.369	0.044	0	1	TOX3
0	0.68275	0.391	0.077	0	1	IRX5
0	0.670714	0.701	0.335	0	1	DHRS3
0	0.666228	0.365	0.155	0	1	ENSCHIG00000021894
0	0.665139	0.994	0.986	0	1	ENSCHIG00000012200
0	0.664812	0.513	0.197	0	1	TIAM1
0	0.659468	0.891	0.433	0	1	ENSCHIG00000018247
0	0.648892	0.763	0.475	0	1	ENSCHIG00000010553
0	0.645398	0.886	0.624	0	1	S100A11
0	0.641798	0.948	0.857	0	1	ENSCHIG00000005203
0	0.625253	0.601	0.231	0	1	GATM
0	0.62353	0.378	0.08	0	1	WNT10A
0	0.620166	0.754	0.287	0	1	PDGFA
0	0.618347	0.521	0.23	0	1	TUT4
0	0.617296	0.512	0.218	0	1	N4BP2
0	0.616397	0.459	0.141	0	1	SERINC2
0	0.611978	0.862	0.482	0	1	PITX1
0	0.611941	0.546	0.234	0	1	MRTFB
0	0.597953	0.912	0.762	0	1	ENSCHIG00000010369
0	0.593226	0.268	0.048	0	1	PRSS22
0	0.59269	0.398	0.137	0	1	NECTIN1
0	0.582911	0.433	0.113	0	1	BARX2
0	0.57993	0.504	0.195	0	1	CHD3
0	0.577121	0.538	0.255	0	1	CD109
0	0.569324	0.245	0.018	0	1	FOXA2
0	0.567955	0.691	0.278	0	1	ENSCHIG00000025317
0	0.563104	0.817	0.406	0	1	IGFBP5
0	0.562824	0.951	0.857	0	1	ENSCHIG00000011371
0	0.562182	0.998	0.998	0	1	ENSCHIG00000020368
0	0.561174	0.997	0.995	0	1	RPL32
0	0.558545	0.645	0.325	0	1	AES
0	0.556772	0.991	0.985	0	1	RPS20
0	0.555458	0.972	0.82	0	1	ND5
0	0.55481	0.995	0.991	0	1	RPS19
0	0.552305	0.988	0.97	0	1	ENSCHIG00000014348
0	0.552173	0.447	0.166	0	1	SEMA3F
0	0.551089	0.995	0.989	0	1	RPL26
0	0.550483	0.393	0.104	0	1	CRISPLD1
0	0.550335	0.994	0.989	0	1	ENSCHIG00000022493
0	0.542171	0.435	0.149	0	1	DIPK1C
0	0.538944	0.99	0.977	0	1	ENSCHIG00000025454
0	0.537701	0.992	0.982	0	1	ENSCHIG00000023211
0	0.532913	0.606	0.301	0	1	PHF14
0	0.531866	0.573	0.295	0	1	ZNF292
0	0.530558	0.456	0.167	0	1	RNF149
0	0.529434	0.984	0.968	0	1	ENSCHIG00000014701
0	0.526027	0.475	0.196	0	1	MLLT3
0	0.521193	0.418	0.157	0	1	RBBP8
0	0.520038	0.325	0.095	0	1	ACVR1B
0	0.515855	0.321	0.105	0	1	EGFR
0	0.511486	0.993	0.99	0	1	ENSCHIG00000013243
0	0.510154	0.995	0.989	0	1	RPL37
0	0.51015	0.996	0.993	0	1	RPS7
0	0.509981	0.475	0.204	0	1	AFDN
0	0.508195	0.988	0.978	0	1	ENSCHIG00000024561
0	0.507997	0.237	0.02	0	1	NCMAP
0	0.497534	0.958	0.902	0	1	EEF1D
0	0.496535	0.988	0.971	0	1	RACK1
0	0.494177	0.857	0.602	0	1	ENSCHIG00000019224
0	0.49356	0.403	0.153	0	1	CEP290
0	0.491989	0.997	0.994	0	1	ENSCHIG00000018150
0	0.485214	0.701	0.397	0	1	ARID5B
0	0.4845	0.516	0.213	0	1	F11R
0	0.482776	0.429	0.168	0	1	FAM126A
0	0.480338	0.976	0.956	0	1	ENSCHIG00000012342
0	0.48012	0.233	0.045	0	1	MAB21L4
0	0.47923	0.234	0.037	0	1	FAM184A
0	0.479054	0.992	0.989	0	1	ENSCHIG00000020543
0	0.478493	0.98	0.973	0	1	ENSCHIG00000013811
0	0.475578	0.331	0.096	0	1	LSR
0	0.473939	0.395	0.142	0	1	PRRG4
0	0.471751	0.961	0.912	0	1	ENSCHIG00000015380
0	0.471093	0.629	0.332	0	1	MEIS1
0	0.470544	0.638	0.332	0	1	CLIC1
0	0.468885	0.608	0.312	0	1	CD82
0	0.468617	0.292	0.069	0	1	ENSCHIG00000014161
0	0.46569	0.323	0.096	0	1	FHDC1
0	0.463722	0.261	0.051	0	1	EPCAM
0	0.461469	0.506	0.201	0	1	TNNI3
0	0.45822	0.992	0.987	0	1	ENSCHIG00000008256
0	0.457751	0.321	0.118	0	1	FAM83D
0	0.457669	0.991	0.988	0	1	ENSCHIG00000015166
0	0.45341	0.471	0.218	0	1	GALNT7
0	0.452781	0.985	0.972	0	1	ENSCHIG00000010409
0	0.452709	0.995	0.991	0	1	RPS9
0	0.451933	0.993	0.991	0	1	RPS5
0	0.449123	0.269	0.087	0	1	ENSCHIG00000005230
0	0.444991	0.997	0.994	0	1	ENSCHIG00000022194
0	0.444562	0.158	0.024	0	1	EDN2
0	0.44389	0.327	0.095	0	1	GPR87
0	0.441347	0.657	0.386	0	1	CAT
0	0.440326	0.994	0.989	0	1	RPS18
0	0.439698	0.993	0.991	0	1	RPS14
0	0.437413	0.994	0.991	0	1	ENSCHIG00000003945
0	0.436852	0.378	0.155	0	1	OXR1
0	0.435293	0.291	0.086	0	1	DLK2
0	0.433974	0.187	0.045	0	1	SHH
0	0.425913	0.915	0.814	0	1	ENSCHIG00000003580
0	0.420096	0.958	0.891	0	1	ENSCHIG00000022487
0	0.419993	0.267	0.096	0	1	SUGP2
0	0.419328	0.999	0.998	0	1	ENSCHIG00000010546
0	0.41813	0.376	0.15	0	1	ACP5
0	0.415861	0.992	0.985	0	1	RPS10
0	0.414308	0.986	0.983	0	1	ENSCHIG00000023017
0	0.412762	0.213	0.036	0	1	DSG2
0	0.412703	0.301	0.117	0	1	CELSR2
0	0.412506	0.318	0.115	0	1	KIAA1217
0	0.41222	0.383	0.176	0	1	RNPC3
0	0.41119	0.989	0.978	0	1	ENSCHIG00000017781
0	0.410566	0.19	0.035	0	1	ENSCHIG00000011757
0	0.410375	0.988	0.979	0	1	RPL10A
0	0.410064	0.993	0.993	0	1	RPLP0
0	0.40961	0.955	0.908	0	1	ENSCHIG00000009267
0	0.409064	0.632	0.398	0	1	ACIN1
0	0.406404	0.963	0.946	0	1	ENSCHIG00000004124
0	0.404994	0.367	0.111	0	1	NCS1
0	0.404155	0.405	0.176	0	1	ZNF444
0	0.403312	0.99	0.983	0	1	ENSCHIG00000011416
0	0.402583	0.286	0.098	0	1	ESRP1
0	0.402343	0.25	0.067	0	1	PATZ1
0	0.40215	0.328	0.112	0	1	KCNK1
0	0.394938	0.988	0.979	0	1	RPS11
0	0.394675	0.984	0.965	0	1	ENSCHIG00000007926
0	0.394058	0.996	0.993	0	1	ENSCHIG00000023850
0	0.391104	0.423	0.202	0	1	SMARCC1
0	0.389971	0.788	0.51	0	1	ENSCHIG00000018248
0	0.389305	0.242	0.081	0	1	QSOX2
0	0.388696	0.2	0.018	0	1	IRX6
0	0.388564	0.245	0.039	0	1	ELF5
0	0.384444	0.487	0.262	0	1	PPIP5K2
0	0.384331	0.236	0.076	0	1	DSG3
0	0.383026	0.283	0.085	0	1	CXADR
0	0.382943	0.974	0.942	0	1	RPS28
0	0.382161	0.39	0.184	0	1	CSAD
0	0.38212	0.993	0.99	0	1	UBA52
0	0.381649	0.499	0.252	0	1	GIPC1
0	0.381284	0.244	0.067	0	1	SOX6
0	0.380603	0.274	0.087	0	1	SPINT1
0	0.380159	0.504	0.224	0	1	PLTP
0	0.380155	0.237	0.045	0	1	VSNL1
0	0.379619	0.84	0.678	0	1	ENSCHIG00000020447
0	0.379345	0.229	0.042	0	1	ENSCHIG00000025376
0	0.378661	0.397	0.18	0	1	PKP4
0	0.376125	0.957	0.881	0	1	RPS17
0	0.37599	0.296	0.09	0	1	ZBTB7C
0	0.375633	0.282	0.076	0	1	SEMA3D
0	0.373814	0.276	0.078	0	1	CPO
0	0.373254	0.999	0.988	0	1	ND4
0	0.373225	0.855	0.678	0	1	PSMG4
0	0.373129	0.993	0.988	0	1	RPS13
0	0.373125	0.644	0.413	0	1	EZR
0	0.373086	0.2	0.048	0	1	EVPL
0	0.37186	0.364	0.129	0	1	KLK10
0	0.371178	0.308	0.1	0	1	ZBED5
0	0.369311	0.546	0.197	0	1	KRT5
0	0.3682	0.703	0.467	0	1	SRSF4
0	0.368025	0.371	0.135	0	1	TNFRSF21
0	0.366591	0.639	0.37	0	1	UQCC2
0	0.366512	0.238	0.04	0	1	REC8
0	0.365773	0.983	0.973	0	1	ENSCHIG00000011680
0	0.364467	0.396	0.167	0	1	PKIA
0	0.363272	0.481	0.251	0	1	ENSCHIG00000018199
0	0.362263	0.374	0.145	0	1	BMP7
0	0.360208	0.996	0.994	0	1	ENSCHIG00000015149
0	0.354684	0.261	0.093	0	1	SEMA4B
0	0.35437	0.294	0.087	0	1	STARD10
0	0.35377	0.801	0.576	0	1	PNISR
0	0.352695	0.486	0.246	0	1	RIMKLB
0	0.352271	0.996	0.992	0	1	ENSCHIG00000016076
0	0.351438	0.992	0.988	0	1	ENSCHIG00000025540
0	0.349845	0.993	0.99	0	1	RPS23
0	0.349248	0.305	0.116	0	1	CHD7
0	0.348596	0.814	0.594	0	1	PNN
0	0.345519	0.941	0.866	0	1	ENSCHIG00000016478
0	0.344351	0.225	0.042	0	1	BEGAIN
0	0.344003	0.797	0.591	0	1	MED21
0	0.342919	0.86	0.586	0	1	CD44
0	0.340895	0.982	0.974	0	1	RPSA
0	0.340436	0.319	0.113	0	1	MPZL2
0	0.339932	0.241	0.078	0	1	NOXA1
0	0.339024	0.491	0.278	0	1	GCC2
0	0.335802	0.486	0.246	0	1	ENSCHIG00000020660
0	0.333812	0.985	0.877	0	1	ND3
0	0.333608	0.216	0.056	0	1	ELMO3
0	0.333487	0.276	0.098	0	1	SMARCAD1
0	0.333385	0.561	0.263	0	1	ANXA3
0	0.33027	0.603	0.351	0	1	NUDT14
0	0.329514	0.537	0.301	0	1	CAPN1
0	0.32911	0.984	0.962	0	1	ENSCHIG00000021732
0	0.327537	0.353	0.176	0	1	NOP53
0	0.326447	0.997	0.994	0	1	ENSCHIG00000016445
0	0.324683	0.468	0.233	0	1	EDN3
0	0.323391	0.435	0.223	0	1	CHD6
0	0.321297	0.329	0.126	0	1	PPP1R14C
0	0.319308	0.992	0.991	0	1	ENSCHIG00000019403
0	0.312327	0.431	0.223	0	1	TTYH3
0	0.310501	0.226	0.037	0	1	WFDC2
0	0.310224	0.626	0.366	0	1	WLS
0	0.309431	0.288	0.111	0	1	PARD6G
0	0.308934	0.25	0.085	0	1	ZNRF3
0	0.308848	0.165	0.025	0	1	ASTN2
0	0.308449	0.208	0.06	0	1	LAMA3
0	0.307027	0.43	0.232	0	1	ENSCHIG00000006955
0	0.306194	0.202	0.039	0	1	TMEM108
0	0.305937	0.281	0.126	0	1	IL20RA
0	0.305918	0.302	0.096	0	1	SOX9
0	0.304871	0.279	0.122	0	1	RNF44
0	0.304597	0.425	0.184	0	1	CLCA2
0	0.303143	0.186	0.028	0	1	ENSCHIG00000016541
0	0.30288	0.25	0.092	0	1	ALDH4A1
0	0.301898	0.519	0.288	0	1	DNLZ
0	0.301412	0.15	0.03	0	1	EML5
0	0.301237	0.981	0.966	0	1	RPL27
0	0.300135	0.23	0.068	0	1	TNNI1
0	0.298044	0.702	0.428	0	1	PAFAH1B3
0	0.295415	0.454	0.246	0	1	ENSCHIG00000021753
0	0.293134	0.995	0.993	0	1	ENSCHIG00000025646
0	0.292945	0.187	0.04	0	1	SLFNL1
0	0.29189	0.99	0.987	0	1	ENSCHIG00000016945
0	0.290998	0.199	0.031	0	1	PGLYRP1
0	0.28995	0.302	0.118	0	1	KRTCAP3
0	0.289499	0.246	0.09	0	1	PACRGL
0	0.287832	0.339	0.156	0	1	RALGPS2
0	0.285033	0.974	0.935	0	1	RPL21
0	0.284131	0.33	0.146	0	1	TCEA3
0	0.284118	0.208	0.066	0	1	SEMA3A
0	0.28405	0.295	0.044	0	1	ENSCHIG00000026725
0	0.281999	0.96	0.926	0	1	EEF1B2
0	0.28177	0.204	0.038	0	1	MIOX
0	0.280057	0.707	0.435	0	1	SYNE2
0	0.279716	0.131	0.006	0	1	ENSCHIG00000005049
0	0.279287	0.941	0.87	0	1	ENSCHIG00000026897
0	0.279058	0.394	0.178	0	1	ENSCHIG00000012557
0	0.278853	0.202	0.042	0	1	TPPP2
0	0.277263	0.993	0.989	0	1	RPL19
0	0.277242	0.215	0.073	0	1	CYP2S1
0	0.27565	0.481	0.247	0	1	FAM241B
0	0.274137	0.318	0.141	0	1	FZD6
0	0.272956	0.37	0.194	0	1	IL1RAP
0	0.272742	0.627	0.386	0	1	ENSCHIG00000025428
0	0.272212	0.384	0.165	0	1	FAM49B
0	0.271364	0.237	0.073	0	1	ENSCHIG00000024736
0	0.270534	0.197	0.049	0	1	BAIAP2L1
0	0.270236	0.316	0.149	0	1	TANC1
0	0.269073	0.262	0.087	0	1	TMEFF1
0	0.268626	0.27	0.07	0	1	NDRG4
0	0.268383	0.149	0.02	0	1	EMB
0	0.267216	0.327	0.143	0	1	MAP9
0	0.261879	0.968	0.943	0	1	ENSCHIG00000017446
0	0.261222	0.171	0.059	0	1	EXPH5
0	0.26096	0.179	0.043	0	1	ACVR2B
0	0.260325	0.203	0.078	0	1	FOXP4
0	0.259986	0.14	0.035	0	1	MAP7
0	0.259551	0.256	0.088	0	1	KIAA1671
0	0.258875	0.496	0.262	0	1	NDRG2
0	0.257742	0.181	0.033	0	1	SNX10
0	0.257384	0.479	0.273	0	1	CNDP2
0	0.257142	0.996	0.994	0	1	ENSCHIG00000000315
0	0.256633	0.203	0.069	0	1	CD164L2
0	0.256493	0.215	0.082	0	1	NAALADL2
0	0.255774	0.256	0.112	0	1	AFF1
0	0.252146	0.266	0.102	0	1	FAIM
0	0.251309	0.334	0.149	0	1	HCFC1R1
0	0.25043	0.358	0.18	0	1	ENSCHIG00000011932
0	0.250154	0.622	0.336	0	1	AHCY
1.65e-306	0.291436	0.915	0.774	3.28e-302	1	ENSCHIG00000009937
4.03e-299	0.268325	0.325	0.166	8.03e-295	1	SETX
9.89e-293	0.293976	0.17	0.067	1.97e-288	1	LARGE2
2e-291	0.349741	0.687	0.466	3.99e-287	1	TGIF1
6.44e-291	0.300878	0.412	0.23	1.28e-286	1	TNRC6A
1.62e-287	0.285417	0.287	0.142	3.22e-283	1	TCF20
3.1e-283	0.260892	0.37	0.199	6.18e-279	1	SHPRH
1.59e-280	0.276277	0.87	0.75	3.17e-276	1	EIF3H
5e-280	0.289034	0.43	0.248	9.95e-276	1	ZNF395
8.94e-277	0.274451	0.747	0.539	1.78e-272	1	ENSCHIG00000012272
4.9e-271	0.303861	0.484	0.289	9.76e-267	1	TNRC18
1.2e-268	0.304609	0.32	0.167	2.39e-264	1	DLG5
2.32e-268	0.270389	0.748	0.553	4.63e-264	1	FBL
9.94e-267	0.286327	0.727	0.506	1.98e-262	1	LUC7L3
2.01e-264	0.29431	0.959	0.895	4e-260	1	ENSCHIG00000001441
2.82e-258	0.260702	0.721	0.519	5.61e-254	1	IMPDH2
3.02e-249	0.282935	0.46	0.275	6.01e-245	1	RBM26
4.1e-249	0.261665	0.242	0.12	8.18e-245	1	ENSCHIG00000012239
3.92e-244	0.279183	0.588	0.384	7.8e-240	1	NKTR
5.69e-237	0.26457	0.424	0.251	1.13e-232	1	LENG8
4.84e-222	0.268881	0.935	0.854	9.63e-218	1	ENSCHIG00000016885
1.76e-211	0.252505	0.399	0.24	3.51e-207	1	EPS8L2
1.55e-204	0.280733	0.652	0.458	3.09e-200	1	ARGLU1
5.86e-191	0.338179	0.998	0.948	1.17e-186	1	ATP6
2.44e-136	0.278502	0.263	0.161	4.85e-132	1	RNF19B
9.02e-130	0.526566	0.657	0.538	1.8e-125	1	MYC
1.91e-121	0.292132	0.946	0.852	3.81e-117	1	ENSCHIG00000012421
2.93e-115	0.291808	0.607	0.453	5.83e-111	1	ETS2
1.54e-109	0.262523	0.989	0.983	3.07e-105	1	ACTG1
9.59e-76	0.257911	0.996	0.978	1.91e-71	1	ENSCHIG00000000004
0	1.7558	0.56	0.267	0	2	KRT4
0	1.6134	0.131	0.024	0	2	TFF3
0	1.4677	0.281	0.106	0	2	SPINK5
0	1.41971	0.849	0.504	0	2	IGFBP2
0	1.38311	0.491	0.247	0	2	KRT7
0	1.33515	0.478	0.255	0	2	MYLK
0	1.20636	0.645	0.644	0	2	S100A11
0	1.13983	0.579	0.306	0	2	KRT14
0	1.13721	0.708	0.43	0	2	ACTG2
0	1.13215	0.58	0.266	0	2	ACTA2
0	1.07789	0.573	0.312	0	2	KRT15
0	1.068	0.691	0.472	0	2	TPM2
0	0.993066	0.529	0.256	0	2	CNN1
0	0.932658	0.128	0.024	0	2	KRTDAP
0	0.919139	0.657	0.56	0	2	IGFBP6
0	0.787549	0.802	0.848	0	2	MYL6B
0	0.719345	0.58	0.313	0	2	CA3
0	0.707239	0.825	0.867	0	2	ENSCHIG00000011371
0	0.672883	0.247	0.091	0	2	PCP4
0	0.638786	0.86	0.878	0	2	HSPB1
0	0.538905	0.464	0.182	0	2	MYH11
0	0.533535	0.95	0.959	0	2	ENSCHIG00000013646
0	0.499507	0.985	0.986	0	2	ENSCHIG00000012200
0	0.495456	0.98	0.978	0	2	ACTB
0	0.49254	0.505	0.363	0	2	DES
0	0.490327	0.928	0.945	0	2	ENSCHIG00000012554
0	0.468516	0.995	0.989	0	2	ENSCHIG00000022493
0	0.436731	0.895	0.948	0	2	RPS28
0	0.43087	0.998	0.995	0	2	RPL32
0	0.426729	0.976	0.979	0	2	ENSCHIG00000024561
0	0.409474	1	0.998	0	2	ENSCHIG00000020368
0	0.39814	0.995	0.99	0	2	UBA52
0	0.395812	0.995	0.988	0	2	ENSCHIG00000015166
0	0.395327	0.945	0.968	0	2	ENSCHIG00000007926
0	0.394585	0.974	0.973	0	2	ENSCHIG00000013811
0	0.39247	0.995	0.991	0	2	RPS19
0	0.38952	0.981	0.974	0	2	RPSA
0	0.382715	0.992	0.989	0	2	RPL37
0	0.359752	0.99	0.983	0	2	ENSCHIG00000011416
0	0.356953	0.738	0.526	0	2	S100A2
0	0.356787	0.975	0.971	0	2	ENSCHIG00000014348
0	0.352313	0.995	0.99	0	2	ENSCHIG00000013243
0	0.351839	0.994	0.989	0	2	RPL26
0	0.340682	1	0.998	0	2	ENSCHIG00000010546
0	0.333395	0.992	0.989	0	2	ENSCHIG00000020543
0	0.329735	0.997	0.994	0	2	ENSCHIG00000000315
0	0.326666	0.997	0.993	0	2	RPS7
0	0.297075	0.998	0.994	0	2	ENSCHIG00000022194
0	0.296537	0.998	0.994	0	2	ENSCHIG00000016445
0	0.257112	0.995	0.993	0	2	ENSCHIG00000023850
2.75e-306	0.280068	0.991	0.987	5.47e-302	2	ENSCHIG00000008256
5.46e-306	0.36838	0.693	0.453	1.09e-301	2	ENSCHIG00000018247
6.22e-295	0.265603	0.995	0.991	1.24e-290	2	RPS5
4.66e-292	0.261248	0.995	0.989	9.28e-288	2	RPL19
4.23e-288	0.839555	0.134	0.043	8.42e-284	2	ACTC1
3.25e-272	0.911566	0.58	0.506	6.47e-268	2	PITX1
1.87e-263	0.289894	0.971	0.979	3.72e-259	2	ENSCHIG00000017781
4.28e-237	0.80089	0.13	0.047	8.52e-233	2	WFDC2
1.69e-236	0.500846	0.773	0.853	3.37e-232	2	ENSCHIG00000010444
3.72e-236	0.25289	0.992	0.987	7.42e-232	2	ENSCHIG00000016945
4.74e-234	0.627462	0.697	0.648	9.44e-230	2	ENSCHIG00000023552
3.95e-227	0.256468	0.986	0.985	7.87e-223	2	RPS20
6.81e-225	0.520961	0.827	0.909	1.36e-220	2	CALM2
1.86e-223	0.50992	0.849	0.911	3.71e-219	2	HMGB1
3.01e-223	0.982843	0.564	0.492	6e-219	2	ENSCHIG00000010553
3.01e-205	1.27496	0.305	0.192	6e-201	2	ENSCHIG00000019803
1.02e-196	0.947211	0.152	0.065	2.03e-192	2	TOP2A
7.52e-196	1.01872	0.15	0.064	1.5e-191	2	CENPF
3.67e-190	0.606732	0.23	0.119	7.31e-186	2	KRT8
1.12e-186	0.533607	0.715	0.786	2.22e-182	2	ENSCHIG00000022516
5.8e-171	0.362428	0.835	0.916	1.15e-166	2	ENSCHIG00000009267
6e-166	0.781274	0.26	0.157	1.19e-161	2	ENSCHIG00000015151
2.13e-152	0.446592	0.761	0.865	4.24e-148	2	ENSCHIG00000010487
3.03e-147	0.537363	0.688	0.78	6.03e-143	2	MIF
2.71e-138	0.436999	0.123	0.054	5.4e-134	2	PENK
6.94e-126	0.75467	0.418	0.335	1.38e-121	2	CKB
6.62e-119	0.314813	0.81	0.912	1.32e-114	2	EEF1D
2.89e-115	0.587652	0.655	0.781	5.75e-111	2	ENSCHIG00000010369
1.99e-103	0.582864	0.222	0.142	3.96e-99	2	KLK10
1.4e-102	0.35973	0.754	0.87	2.79e-98	2	ENSCHIG00000005203
3.28e-90	0.859332	0.118	0.061	6.54e-86	2	A2ML1
1.08e-86	0.71322	0.261	0.186	2.16e-82	2	ENSCHIG00000020204
2.54e-81	0.782991	0.195	0.134	5.05e-77	2	BARX2
4.7e-75	0.280987	0.224	0.368	9.36e-71	2	FXR1
1.05e-74	0.439127	0.173	0.108	2.1e-70	2	SMTN
8.77e-70	0.91305	0.477	0.534	1.75e-65	2	ENSCHIG00000018248
1.51e-64	0.259918	0.335	0.525	3.01e-60	2	ROMO1
3.39e-63	0.664477	0.128	0.079	6.75e-59	2	SPC24
3.62e-63	0.466279	0.644	0.793	7.21e-59	2	ENSCHIG00000009937
8.72e-63	0.632178	0.121	0.073	1.74e-58	2	TPX2
1.9e-60	0.250678	0.227	0.355	3.78e-56	2	PHF3
6.16e-60	0.482923	0.13	0.081	1.23e-55	2	RHOV
2.98e-57	0.740489	0.263	0.21	5.94e-53	2	SOX2
1.47e-56	0.263533	0.344	0.536	2.94e-52	2	PDCD5
5.66e-56	0.496441	0.456	0.436	1.13e-51	2	IGFBP5
6.61e-53	0.283309	0.329	0.5	1.32e-48	2	RSRC2
6.01e-52	0.403795	0.59	0.619	1.2e-47	2	CALD1
6.81e-52	0.274167	0.358	0.544	1.36e-47	2	ENSCHIG00000014169
7.4e-51	0.266129	0.354	0.534	1.47e-46	2	LUC7L3
1.31e-49	0.326181	0.306	0.463	2.61e-45	2	ENSCHIG00000026323
1.53e-49	0.597009	0.534	0.626	3.05e-45	2	ENSCHIG00000019224
1.62e-48	0.274816	0.204	0.315	3.22e-44	2	CNIH4
4.66e-48	0.290786	0.32	0.484	9.28e-44	2	PSME1
2.21e-47	0.25543	0.232	0.354	4.4e-43	2	RNASEH2C
3.45e-47	0.788758	0.202	0.158	6.86e-43	2	ENSCHIG00000025683
4.14e-47	0.291464	0.299	0.451	8.24e-43	2	PPIG
5.87e-47	0.318304	0.331	0.499	1.17e-42	2	LSM7
1.12e-46	0.386691	0.245	0.377	2.24e-42	2	HEBP2
1.4e-46	0.296799	0.274	0.413	2.8e-42	2	TBCA
6.33e-45	0.565519	0.373	0.344	1.26e-40	2	TPMT
6.52e-45	0.324627	0.236	0.356	1.3e-40	2	AES
6.81e-43	0.410044	0.664	0.829	1.36e-38	2	ENSCHIG00000020918
9.11e-43	0.326596	0.238	0.356	1.81e-38	2	NAA38
1.71e-42	0.263626	0.142	0.224	3.4e-38	2	ANP32E
2.64e-42	0.254514	0.191	0.29	5.27e-38	2	ENSCHIG00000010289
1.75e-41	0.290767	0.376	0.544	3.48e-37	2	ENSCHIG00000014929
7.73e-41	0.302093	0.198	0.298	1.54e-36	2	RNASEK
3.46e-40	0.300178	0.224	0.33	6.9e-36	2	PHF14
2.56e-39	0.414509	0.376	0.335	5.1e-35	2	KLF5
1.88e-37	0.329148	0.292	0.431	3.75e-33	2	ENSCHIG00000012507
2.01e-37	0.263742	0.236	0.348	3.99e-33	2	DBI
2.11e-37	0.684426	0.256	0.217	4.19e-33	2	DSP
9.29e-37	0.267925	0.198	0.294	1.85e-32	2	POLR1D
1.43e-34	0.338076	0.259	0.38	2.85e-30	2	ENSCHIG00000023970
1.06e-33	0.296848	0.353	0.519	2.12e-29	2	ENSCHIG00000001147
3.92e-33	0.280314	0.182	0.268	7.8e-29	2	SAE1
8.28e-33	0.277288	0.357	0.521	1.65e-28	2	ENSCHIG00000015732
2.09e-32	0.414814	0.119	0.082	4.16e-28	2	NPNT
2.13e-32	0.352737	0.245	0.354	4.25e-28	2	ENSCHIG00000024013
4.44e-32	0.272908	0.195	0.282	8.85e-28	2	CD109
2.37e-31	0.301196	0.203	0.293	4.72e-27	2	SNRNP25
6.93e-31	0.261135	0.152	0.223	1.38e-26	2	SMARCC1
5.23e-30	0.322834	0.255	0.366	1.04e-25	2	RPS27L
9.15e-30	0.273167	0.116	0.179	1.82e-25	2	AK1
2.2e-28	0.291488	0.161	0.233	4.38e-24	2	ENSCHIG00000018241
4.82e-28	0.343616	0.178	0.256	9.59e-24	2	TUT4
9.17e-27	0.285615	0.239	0.34	1.83e-22	2	CD82
2.69e-26	0.250429	0.161	0.227	5.35e-22	2	POLR2G
3.7e-26	0.32822	0.821	0.899	7.37e-22	2	TUBA1B
5.09e-25	0.373809	0.349	0.5	1.01e-20	2	NDUFB3
8.47e-25	0.253278	0.148	0.21	1.69e-20	2	ENSCHIG00000014790
1.48e-24	0.379636	0.32	0.461	2.94e-20	2	ENSCHIG00000015525
4.98e-24	0.360932	0.286	0.403	9.91e-20	2	NDUFA2
4e-23	0.284465	0.194	0.269	7.97e-19	2	FAM241B
1.02e-22	0.268761	0.148	0.208	2.04e-18	2	FAM229B
2.95e-22	0.41537	0.169	0.139	5.88e-18	2	PDZK1IP1
2.6e-21	0.419555	0.294	0.409	5.18e-17	2	CETN3
7.74e-21	0.308333	0.178	0.244	1.54e-16	2	N4BP2
1.05e-20	0.275083	0.158	0.217	2.1e-16	2	ENSCHIG00000012087
5.77e-20	0.358878	0.192	0.265	1.15e-15	2	ENSCHIG00000013891
2.56e-19	0.386479	0.285	0.397	5.1e-15	2	UQCC2
8.08e-19	0.309452	0.283	0.383	1.61e-14	2	PDLIM7
6.07e-18	0.79094	0.132	0.109	1.21e-13	2	CKAP2
6.35e-18	0.524553	0.116	0.092	1.26e-13	2	CENPW
1.13e-17	0.402538	0.359	0.516	2.25e-13	2	VPS28
7.35e-17	0.3017	0.144	0.196	1.46e-12	2	ENSCHIG00000011932
1.05e-16	0.263521	0.113	0.156	2.09e-12	2	ENSCHIG00000011806
6.27e-16	0.368924	0.37	0.524	1.25e-11	2	BLOC1S1
1.44e-15	0.293024	0.202	0.265	2.88e-11	2	ENSCHIG00000024885
5.64e-15	0.621692	0.312	0.318	1.12e-10	2	C4orf48
6.95e-15	0.266056	0.319	0.424	1.38e-10	2	OCIAD2
1.12e-14	0.277993	0.546	0.654	2.24e-10	2	CSRP1
6.74e-14	0.306823	0.436	0.613	1.34e-09	2	NDUFA12
1.54e-13	0.29321	0.174	0.227	3.07e-09	2	TNNI3
6.61e-13	0.320683	0.125	0.167	1.32e-08	2	DHDDS
1.01e-12	0.392996	0.268	0.354	2.02e-08	2	DSTN
3.24e-12	0.516323	0.259	0.248	6.46e-08	2	TMPRSS11A
3.89e-12	0.281067	0.128	0.169	7.75e-08	2	ENSCHIG00000000883
4.43e-12	0.387196	0.319	0.43	8.83e-08	2	ENSCHIG00000009892
7.44e-12	0.485787	0.196	0.18	1.48e-07	2	TMEM238
9.9e-12	0.375362	0.17	0.221	1.97e-07	2	CHD3
1.24e-11	0.258298	0.106	0.087	2.47e-07	2	RAB25
2.29e-11	0.669501	0.194	0.183	4.57e-07	2	COL17A1
2.83e-10	0.649225	0.304	0.407	5.65e-06	2	ENSCHIG00000020087
1.07e-09	0.389877	0.276	0.359	2.13e-05	2	CLIC1
1.54e-09	0.286158	0.154	0.196	3.06e-05	2	MACROD1
2.33e-09	0.26455	0.19	0.238	4.63e-05	2	ANK3
4.24e-09	0.283134	0.474	0.663	8.45e-05	2	NDUFB10
1.64e-08	0.398766	0.306	0.306	0.000325884	2	HSPB8
2.25e-08	0.545084	0.141	0.128	0.000448097	2	KIF20B
1.43e-07	0.354513	0.14	0.174	0.00285132	2	OXR1
1.99e-07	0.924768	0.11	0.137	0.00395814	2	S100A12
1.99e-07	0.286127	0.14	0.172	0.00396527	2	RALGPS2
2.04e-07	0.532009	0.112	0.098	0.00407214	2	ENSCHIG00000016845
2.2e-07	0.286587	0.107	0.133	0.00437999	2	HACD1
2.96e-07	0.26739	0.487	0.679	0.00589314	2	ATP5IF1
5.53e-07	0.364698	0.483	0.683	0.0110228	2	ENSCHIG00000015711
0	4.02957	0.724	0.07	0	3	ENSCHIG00000015928
0	3.10791	0.838	0.196	0	3	TNFAIP6
0	3.04212	0.966	0.213	0	3	MGP
0	2.89548	0.961	0.182	0	3	MFAP5
0	2.85645	0.958	0.279	0	3	CXCL12
0	2.78491	0.691	0.195	0	3	HMOX1
0	2.57519	0.917	0.148	0	3	PDGFRL
0	2.56686	0.657	0.107	0	3	SERPINF1
0	2.50963	0.86	0.33	0	3	TFPI2
0	2.49577	0.987	0.438	0	3	COL1A2
0	2.40178	0.899	0.491	0	3	ENSCHIG00000014217
0	2.36588	0.995	0.439	0	3	CLEC3B
0	2.28064	0.938	0.388	0	3	DLK1
0	2.22884	0.998	0.477	0	3	DCN
0	2.19962	0.973	0.442	0	3	TIMP2
0	2.18584	0.965	0.32	0	3	PCOLCE
0	2.1811	0.656	0.25	0	3	IER3
0	2.16392	0.999	0.737	0	3	SPARC
0	2.16318	0.837	0.228	0	3	C1S
0	2.12593	0.848	0.245	0	3	CCDC80
0	2.10546	0.982	0.434	0	3	COL1A1
0	2.07917	0.783	0.144	0	3	IGF1
0	2.06114	0.952	0.301	0	3	SPON2
0	2.03399	0.996	0.911	0	3	ENSCHIG00000009090
0	2.02965	0.794	0.246	0	3	GSN
0	1.99413	0.461	0.067	0	3	PCOLCE2
0	1.9703	0.998	0.483	0	3	LUM
0	1.96108	0.779	0.146	0	3	CRISPLD2
0	1.93214	0.717	0.103	0	3	FAP
0	1.89998	0.695	0.106	0	3	TNXB
0	1.85522	0.903	0.61	0	3	FOSB
0	1.85304	0.745	0.205	0	3	GEM
0	1.80595	0.79	0.333	0	3	METRNL
0	1.79096	0.74	0.221	0	3	C1R
0	1.75937	0.824	0.333	0	3	ADAMTS1
0	1.73064	0.792	0.386	0	3	KLF2
0	1.72974	0.313	0.072	0	3	ENSCHIG00000021630
0	1.72239	0.647	0.148	0	3	FBN1
0	1.70583	0.274	0.035	0	3	CCL11
0	1.65859	0.891	0.297	0	3	MMP2
0	1.6267	0.786	0.127	0	3	FGL2
0	1.61998	0.964	0.368	0	3	OGN
0	1.61149	0.852	0.302	0	3	COL14A1
0	1.6032	0.83	0.622	0	3	ENSCHIG00000023424
0	1.60112	0.748	0.413	0	3	VEGFA
0	1.56771	0.676	0.154	0	3	PID1
0	1.55118	0.783	0.356	0	3	ENSCHIG00000022600
0	1.54299	0.472	0.064	0	3	CILP
0	1.53579	0.926	0.667	0	3	KLF4
0	1.52252	0.392	0.052	0	3	CXCL10
0	1.51103	0.757	0.432	0	3	NFKBIZ
0	1.49214	0.628	0.125	0	3	ECM2
0	1.44983	0.875	0.645	0	3	TUBB4B
0	1.44314	0.674	0.418	0	3	HSPH1
0	1.41197	0.949	0.522	0	3	RARRES2
0	1.37018	0.932	0.744	0	3	ZFP36
0	1.36979	0.85	0.539	0	3	CYR61
0	1.36234	0.937	0.445	0	3	FBLN1
0	1.34769	0.369	0.097	0	3	SOX9
0	1.33893	0.638	0.199	0	3	TGFBR3
0	1.33672	0.475	0.057	0	3	QPCT
0	1.32864	0.796	0.45	0	3	NOVA1
0	1.30668	0.603	0.216	0	3	VCAN
0	1.30577	0.349	0.059	0	3	CPZ
0	1.30527	0.309	0.105	0	3	THBS4
0	1.29794	0.741	0.265	0	3	ENSCHIG00000004889
0	1.29628	0.538	0.126	0	3	CAMK2N1
0	1.28783	0.628	0.201	0	3	LTBP4
0	1.28387	0.325	0.123	0	3	NPPC
0	1.27926	0.782	0.247	0	3	MMP23B
0	1.27388	0.637	0.274	0	3	JDP2
0	1.25468	0.797	0.416	0	3	NPDC1
0	1.24528	0.55	0.192	0	3	COL8A1
0	1.23903	0.426	0.146	0	3	RDH10
0	1.23851	0.43	0.156	0	3	ADM
0	1.2181	0.893	0.715	0	3	HSPA8
0	1.19862	0.723	0.259	0	3	DPYSL3
0	1.19396	0.588	0.184	0	3	PROS1
0	1.19018	0.579	0.189	0	3	DAB2
0	1.18746	0.81	0.38	0	3	SELENOM
0	1.18295	0.64	0.368	0	3	TRIB1
0	1.17816	0.895	0.623	0	3	ENSCHIG00000010216
0	1.1781	0.311	0.03	0	3	PTGS2
0	1.16804	0.946	0.815	0	3	HSPA5
0	1.16546	0.887	0.777	0	3	JUN
0	1.1617	0.403	0.136	0	3	THBS1
0	1.13503	0.777	0.287	0	3	TCF21
0	1.11141	0.608	0.203	0	3	AKAP12
0	1.10684	0.984	0.824	0	3	SERPINH1
0	1.09264	0.976	0.834	0	3	ENSCHIG00000021207
0	1.07566	0.536	0.234	0	3	REV3L
0	1.06174	0.651	0.327	0	3	UBL3
0	1.06154	0.619	0.255	0	3	ENSCHIG00000016165
0	1.06131	0.407	0.081	0	3	ADAMTSL3
0	1.05497	0.498	0.133	0	3	TGFB2
0	1.04306	0.722	0.397	0	3	SPATS2L
0	1.04071	0.842	0.495	0	3	CDKN1C
0	1.04038	0.68	0.397	0	3	ERRFI1
0	1.02512	0.658	0.332	0	3	ADD3
0	1.02299	0.73	0.212	0	3	ASPN
0	1.02142	0.634	0.355	0	3	BTG1
0	1.01298	0.717	0.407	0	3	ENSCHIG00000018361
0	1.01184	0.359	0.159	0	3	CTGF
0	1.01123	0.66	0.187	0	3	ENSCHIG00000006308
0	1.00388	0.451	0.129	0	3	THBS2
0	0.997087	0.426	0.101	0	3	SSC5D
0	0.995508	0.616	0.288	0	3	IFI6
0	0.992511	0.551	0.179	0	3	CELF2
0	0.989756	0.525	0.263	0	3	F2R
0	0.987835	0.307	0.074	0	3	ENSCHIG00000020774
0	0.987543	0.846	0.652	0	3	HERPUD1
0	0.984026	0.667	0.409	0	3	RND3
0	0.979339	0.942	0.76	0	3	ITM2B
0	0.972936	0.434	0.143	0	3	FMOD
0	0.970594	0.614	0.278	0	3	FOXO1
0	0.967612	0.561	0.25	0	3	FNDC3B
0	0.955707	0.471	0.184	0	3	ARHGAP21
0	0.953313	0.689	0.315	0	3	SGCE
0	0.953096	0.419	0.097	0	3	LAMA2
0	0.949889	0.877	0.611	0	3	SPTBN1
0	0.949324	0.499	0.17	0	3	FSTL1
0	0.946266	0.281	0.043	0	3	GDF10
0	0.946239	0.694	0.351	0	3	FAM114A1
0	0.935023	0.539	0.251	0	3	TRIP10
0	0.934749	0.516	0.218	0	3	LAMB1
0	0.933215	0.713	0.284	0	3	TGFBI
0	0.930435	0.638	0.358	0	3	SDC4
0	0.922893	0.779	0.57	0	3	GADD45B
0	0.918214	0.539	0.232	0	3	NUCB2
0	0.90604	0.557	0.232	0	3	ITIH5
0	0.899304	0.623	0.394	0	3	ATF3
0	0.895575	0.9	0.735	0	3	LMNA
0	0.887905	0.53	0.247	0	3	GLB1
0	0.886378	0.151	0.029	0	3	LIF
0	0.885253	0.368	0.078	0	3	ADAMTS2
0	0.884347	0.827	0.391	0	3	PMP22
0	0.88423	0.757	0.431	0	3	NFKBIA
0	0.88382	0.726	0.537	0	3	MYC
0	0.866892	0.462	0.156	0	3	PFKP
0	0.866268	0.491	0.139	0	3	C1QTNF7
0	0.858961	0.28	0.024	0	3	DPT
0	0.850309	0.355	0.125	0	3	FKBP5
0	0.848731	0.783	0.56	0	3	SDF4
0	0.843949	0.612	0.296	0	3	COPZ2
0	0.842606	0.484	0.191	0	3	FKBP7
0	0.840175	0.443	0.166	0	3	MAN2B1
0	0.837952	0.428	0.138	0	3	BCHE
0	0.833156	0.254	0.022	0	3	IGSF10
0	0.830855	0.543	0.199	0	3	ENSCHIG00000022648
0	0.828814	0.958	0.884	0	3	DDX5
0	0.826799	0.805	0.352	0	3	PLAC9
0	0.822109	0.479	0.215	0	3	P4HA2
0	0.816057	0.193	0.006	0	3	VIT
0	0.81047	0.37	0.128	0	3	NUMBL
0	0.8092	0.491	0.21	0	3	COL5A2
0	0.806137	0.753	0.528	0	3	ENSCHIG00000023303
0	0.798343	0.769	0.386	0	3	SDC2
0	0.796938	0.312	0.098	0	3	CSF1
0	0.791664	0.328	0.069	0	3	CLEC11A
0	0.783791	0.312	0.104	0	3	TENT5A
0	0.782003	0.641	0.399	0	3	FKBP11
0	0.777609	0.256	0.047	0	3	IGFBP3
0	0.773859	0.642	0.39	0	3	ZFAND5
0	0.772089	0.904	0.772	0	3	EIF1
0	0.762385	0.346	0.099	0	3	OLFML1
0	0.746066	0.515	0.297	0	3	CDO1
0	0.74502	0.834	0.666	0	3	DNAJA1
0	0.742976	0.374	0.206	0	3	EGR1
0	0.740884	0.447	0.218	0	3	GRASP
0	0.731661	0.774	0.452	0	3	EMP3
0	0.72881	0.971	0.922	0	3	UBB
0	0.717115	0.642	0.412	0	3	IFNGR2
0	0.71474	0.683	0.351	0	3	CEBPD
0	0.714587	0.837	0.626	0	3	S100A13
0	0.712279	0.431	0.158	0	3	LRRC17
0	0.711935	0.352	0.164	0	3	SEMA3C
0	0.711114	0.261	0.085	0	3	ENSCHIG00000012339
0	0.710159	0.415	0.172	0	3	IKBIP
0	0.708925	0.937	0.823	0	3	ATF4
0	0.708498	0.822	0.595	0	3	ARPC1B
0	0.706736	0.336	0.104	0	3	AEBP1
0	0.706056	0.288	0.067	0	3	COL15A1
0	0.705738	0.558	0.234	0	3	CDC42EP5
0	0.700218	0.121	0.013	0	3	CCL26
0	0.697628	0.33	0.161	0	3	ENSCHIG00000020216
0	0.696704	0.432	0.237	0	3	ZSWIM6
0	0.683786	0.307	0.08	0	3	SLIT2
0	0.681965	0.746	0.551	0	3	CTSV
0	0.677276	0.726	0.532	0	3	TOB1
0	0.674209	0.544	0.32	0	3	GINM1
0	0.673993	0.905	0.73	0	3	YBX3
0	0.671214	0.406	0.178	0	3	IGSF8
0	0.668999	0.205	0.063	0	3	RGS4
0	0.667031	0.611	0.384	0	3	CDKN1A
0	0.664679	0.254	0.068	0	3	ADAMTSL4
0	0.664348	0.3	0.089	0	3	COL6A2
0	0.663602	0.124	0.011	0	3	STC2
0	0.663128	0.234	0.047	0	3	PHTF2
0	0.660199	0.32	0.137	0	3	CPXM1
0	0.655953	0.355	0.16	0	3	HPCAL1
0	0.649027	0.266	0.081	0	3	COL6A3
0	0.645127	0.251	0.048	0	3	NUPR1
0	0.640138	0.994	0.726	0	3	VIM
0	0.636167	0.264	0.073	0	3	CYBRD1
0	0.633624	0.303	0.127	0	3	GLCE
0	0.633086	0.315	0.138	0	3	IRF1
0	0.63067	0.533	0.32	0	3	RGMB
0	0.619297	0.296	0.1	0	3	TMTC2
0	0.619225	0.444	0.196	0	3	NRP1
0	0.618566	0.932	0.823	0	3	RABAC1
0	0.617301	0.762	0.545	0	3	RRBP1
0	0.613471	0.342	0.14	0	3	PKD2
0	0.613422	0.749	0.494	0	3	IFRD1
0	0.611738	0.244	0.067	0	3	PDGFRA
0	0.611485	0.483	0.279	0	3	SNTB2
0	0.61106	0.244	0.078	0	3	OLFML2B
0	0.603583	0.251	0.064	0	3	MAN1C1
0	0.596619	0.935	0.841	0	3	ZFP36L1
0	0.591352	0.466	0.278	0	3	MCFD2
0	0.578872	0.847	0.711	0	3	SSR3
0	0.578355	0.161	0.009	0	3	HSD11B1
0	0.577073	0.202	0.042	0	3	ZBTB16
0	0.57628	0.989	0.961	0	3	HSP90AA1
0	0.572088	0.303	0.14	0	3	FAM13A
0	0.566054	0.24	0.052	0	3	SLC7A10
0	0.565455	0.291	0.096	0	3	CPE
0	0.564838	0.938	0.865	0	3	ENSCHIG00000021423
0	0.564203	0.747	0.488	0	3	EMP1
0	0.560228	0.854	0.55	0	3	LGALS1
0	0.5575	0.296	0.108	0	3	PCSK5
0	0.557072	0.396	0.209	0	3	RHOBTB3
0	0.554884	0.182	0.026	0	3	ENSCHIG00000012294
0	0.552315	0.786	0.597	0	3	CD44
0	0.551071	0.181	0.029	0	3	TMEFF2
0	0.545769	0.287	0.123	0	3	PLCB1
0	0.542112	0.37	0.19	0	3	AXL
0	0.539839	0.306	0.124	0	3	PTGS1
0	0.539316	0.205	0.045	0	3	UST
0	0.531558	0.975	0.907	0	3	PPIB
0	0.530039	0.704	0.494	0	3	CKAP4
0	0.529764	0.132	0.023	0	3	CCL2
0	0.528046	0.25	0.089	0	3	ENSCHIG00000012978
0	0.524201	0.385	0.126	0	3	IL6
0	0.52339	0.379	0.141	0	3	BMP4
0	0.520147	0.157	0.023	0	3	ADAMTS5
0	0.51962	0.418	0.199	0	3	MAP1A
0	0.518347	0.246	0.072	0	3	ABI3BP
0	0.516891	0.148	0.014	0	3	MEDAG
0	0.515743	0.989	0.942	0	3	ENSCHIG00000011782
0	0.514135	0.476	0.233	0	3	COL4A1
0	0.512892	0.968	0.878	0	3	CALR
0	0.510586	0.179	0.029	0	3	IL18
0	0.507386	0.212	0.063	0	3	LRP1
0	0.506069	0.957	0.877	0	3	UBC
0	0.504176	0.207	0.06	0	3	HTRA1
0	0.4998	0.326	0.134	0	3	PKDCC
0	0.499173	0.24	0.096	0	3	GBE1
0	0.497234	0.284	0.102	0	3	C1QTNF2
0	0.491962	0.13	0.008	0	3	ITGBL1
0	0.489115	0.279	0.124	0	3	GPX8
0	0.485379	0.247	0.08	0	3	LPAR1
0	0.482592	0.525	0.244	0	3	CRABP2
0	0.479532	0.147	0.028	0	3	SVEP1
0	0.477251	0.131	0.015	0	3	TMEM266
0	0.476122	0.218	0.064	0	3	LOX
0	0.473938	0.185	0.059	0	3	ARHGDIG
0	0.470577	0.609	0.297	0	3	DLC1
0	0.467918	0.245	0.099	0	3	LY96
0	0.457446	0.166	0.041	0	3	DCLK1
0	0.454617	0.222	0.079	0	3	RBP4
0	0.450407	0.175	0.046	0	3	ENSCHIG00000023433
0	0.442949	0.174	0.042	0	3	ENSCHIG00000020248
0	0.436012	0.201	0.048	0	3	SERPING1
0	0.433475	0.185	0.057	0	3	GPR153
0	0.428911	0.22	0.079	0	3	FBLN7
0	0.41702	0.997	0.986	0	3	FTH1
0	0.416732	0.64	0.325	0	3	ADAMTS4
0	0.413401	0.133	0.021	0	3	ENSCHIG00000005603
0	0.407784	0.104	0.017	0	3	ENSCHIG00000000357
0	0.403053	0.901	0.461	0	3	APOE
0	0.39962	0.172	0.053	0	3	IL10RA
0	0.394829	0.131	0.027	0	3	LVRN
0	0.38592	0.144	0.037	0	3	BCO2
0	0.380767	0.133	0.036	0	3	C16orf89
0	0.354661	0.114	0.025	0	3	ADGRD1
0	0.352697	0.118	0.018	0	3	FAM102B
0	0.352678	0.115	0.014	0	3	MITF
0	0.352	0.324	0.133	0	3	HAPLN1
0	0.351547	0.182	0.061	0	3	MCUB
0	0.345079	0.135	0.034	0	3	GLI2
0	0.341643	0.444	0.21	0	3	NEXN
0	0.339043	0.136	0.038	0	3	ANK2
0	0.336918	0.119	0.021	0	3	SCARA5
0	0.335239	0.802	0.583	0	3	MARCKS
0	0.333024	0.121	0.025	0	3	CHRD
0	0.307664	0.114	0.027	0	3	BICC1
0	0.259526	0.699	0.442	0	3	MGST1
5.31e-307	0.9068	0.14	0.041	1.06e-302	3	C3
1.01e-303	0.337037	0.141	0.041	2.02e-299	3	SLIT3
1.9e-303	0.555664	0.412	0.235	3.77e-299	3	NFIX
4.5e-303	0.41852	0.283	0.123	8.96e-299	3	PDZRN3
2.39e-302	0.56484	0.695	0.506	4.77e-298	3	BTG2
5.11e-302	0.571533	0.335	0.173	1.02e-297	3	EPS15
1.59e-300	0.627747	0.523	0.359	3.17e-296	3	TMEM43
3.86e-300	0.433677	0.83	0.681	7.69e-296	3	NENF
1.89e-299	0.510555	0.275	0.126	3.76e-295	3	ANXA5
6.81e-298	0.631594	0.261	0.118	1.36e-293	3	ENSCHIG00000023592
5.75e-296	0.509331	0.772	0.637	1.15e-291	3	TOP1
8.09e-293	0.278021	0.102	0.024	1.61e-288	3	CD248
3.07e-292	0.512653	0.373	0.2	6.12e-288	3	TPST1
7e-290	0.716041	0.535	0.37	1.39e-285	3	MIDN
3.05e-289	0.542427	0.376	0.207	6.08e-285	3	PGM3
7.54e-286	0.533926	0.456	0.262	1.5e-281	3	FILIP1L
2.13e-285	0.592431	0.514	0.348	4.25e-281	3	PRXL2B
2.49e-285	0.535568	0.76	0.555	4.97e-281	3	IGFBP6
4.63e-285	0.646975	0.2	0.079	9.23e-281	3	UAP1
2.18e-284	0.358215	0.428	0.225	4.34e-280	3	TCN2
5.78e-281	0.427843	0.458	0.257	1.15e-276	3	ENSCHIG00000020984
6.69e-281	0.563136	0.507	0.335	1.33e-276	3	B4GALT1
2.39e-280	0.368684	0.149	0.048	4.75e-276	3	TNFAIP8L3
4.51e-279	0.43538	0.345	0.172	8.97e-275	3	CNRIP1
1.88e-273	0.56051	0.318	0.167	3.75e-269	3	DPP7
1.19e-272	0.521205	0.434	0.252	2.37e-268	3	COL16A1
3.56e-270	0.394611	0.324	0.154	7.09e-266	3	ABCC9
9.81e-269	0.369775	0.132	0.04	1.95e-264	3	EBF2
2.56e-267	0.45529	0.211	0.083	5.09e-263	3	MEOX2
9.66e-265	0.572838	0.44	0.282	1.93e-260	3	ENSCHIG00000020180
9.62e-264	0.511522	0.498	0.321	1.92e-259	3	GLS
1.5e-260	0.421353	0.435	0.242	2.99e-256	3	EFEMP2
1.21e-257	0.266098	0.124	0.037	2.41e-253	3	MYH6
2.64e-257	0.554297	0.352	0.198	5.27e-253	3	NR1D2
1.82e-252	0.376308	0.161	0.058	3.62e-248	3	CD302
3.71e-252	0.630179	0.623	0.471	7.38e-248	3	JMJD1C
5.84e-252	0.479783	0.804	0.679	1.16e-247	3	BRD2
7.49e-252	0.487812	0.369	0.205	1.49e-247	3	BIN1
1.87e-250	0.439793	0.113	0.032	3.73e-246	3	SHISA3
3.91e-244	0.4456	0.129	0.041	7.79e-240	3	CTHRC1
1.6e-242	0.358202	0.208	0.086	3.18e-238	3	FGFR1
6.51e-239	0.47155	0.409	0.238	1.3e-234	3	LAMB2
2.66e-235	0.40579	0.4	0.227	5.29e-231	3	JAM3
3.95e-235	0.473998	0.263	0.13	7.88e-231	3	CD276
5.75e-230	0.539442	0.525	0.373	1.15e-225	3	GOLIM4
1.05e-222	0.408276	0.255	0.122	2.1e-218	3	LAMC1
1.54e-220	0.467721	0.62	0.494	3.06e-216	3	SEC61G
3.13e-220	0.350188	0.208	0.09	6.23e-216	3	LURAP1L
1.33e-218	0.55473	0.832	0.741	2.64e-214	3	AMDHD2
6.76e-218	0.688775	0.654	0.521	1.35e-213	3	ENSCHIG00000021684
1.43e-217	0.498216	0.416	0.266	2.84e-213	3	ITGB5
3.57e-215	0.366441	0.868	0.762	7.1e-211	3	HSP90B1
4.13e-213	0.420656	0.282	0.148	8.22e-209	3	FAM20C
1.16e-212	0.989843	0.24	0.118	2.3e-208	3	HSPA6
1.39e-212	0.406165	0.173	0.071	2.78e-208	3	SQSTM1
2.11e-212	0.430102	0.214	0.099	4.2e-208	3	DBP
5.39e-211	0.459863	0.143	0.053	1.07e-206	3	SERPINE1
1.79e-210	0.624368	0.526	0.383	3.57e-206	3	AHNAK
8.04e-210	0.53489	0.38	0.242	1.6e-205	3	SCPEP1
2.35e-208	0.391058	0.203	0.089	4.67e-204	3	PCDH18
1.01e-205	0.37047	0.226	0.104	2.01e-201	3	LAMA4
4.44e-202	0.488312	0.361	0.22	8.84e-198	3	JUNB
1.66e-201	0.668893	0.532	0.397	3.3e-197	3	ENSCHIG00000025428
1.71e-201	0.43407	0.534	0.396	3.4e-197	3	LAPTM4A
2.16e-201	0.486879	0.462	0.316	4.31e-197	3	ARHGAP10
2.12e-198	0.459253	0.559	0.421	4.22e-194	3	TCF7L2
4.39e-197	0.304878	0.118	0.04	8.75e-193	3	ENSCHIG00000017121
6.18e-196	0.315909	0.436	0.259	1.23e-191	3	ENSCHIG00000026985
2.49e-195	0.36602	0.463	0.295	4.96e-191	3	MEIS2
6.48e-195	0.326593	0.157	0.064	1.29e-190	3	GCH1
6.94e-194	0.28118	0.145	0.055	1.38e-189	3	ZBTB20
1.52e-189	0.515819	0.251	0.132	3.02e-185	3	CTH
2.36e-189	0.290814	0.149	0.058	4.7e-185	3	TGFB3
3.67e-189	0.348541	0.223	0.106	7.32e-185	3	PDE4A
1.27e-188	0.474466	0.488	0.353	2.52e-184	3	NT5DC2
3.3e-186	0.361613	0.853	0.747	6.56e-182	3	TXN
4.38e-186	0.415678	0.241	0.123	8.73e-182	3	TSPAN11
4.71e-185	0.392259	0.575	0.414	9.39e-181	3	CCNL1
2.82e-184	0.422917	0.366	0.228	5.62e-180	3	CCPG1
1.38e-183	0.650154	0.205	0.096	2.74e-179	3	C2orf40
3.43e-182	0.278592	0.153	0.062	6.83e-178	3	ENSCHIG00000022145
9.04e-182	0.283383	0.103	0.035	1.8e-177	3	MOCOS
7.19e-181	0.44244	0.444	0.311	1.43e-176	3	FAM3C
9.07e-181	0.389781	0.217	0.107	1.81e-176	3	SFXN1
1.77e-180	0.465807	0.473	0.334	3.52e-176	3	GSTM3
2.52e-180	0.719601	0.368	0.237	5.01e-176	3	IER5L
2.59e-180	0.353468	0.921	0.864	5.17e-176	3	EIF4A1
4.54e-179	0.333286	0.428	0.282	9.05e-175	3	COTL1
8.71e-178	0.365986	0.451	0.299	1.73e-173	3	SGK1
3.71e-176	0.586304	0.339	0.199	7.38e-172	3	ENSCHIG00000020804
5.65e-176	0.345743	0.801	0.71	1.12e-171	3	SEC62
9.82e-174	0.315672	0.165	0.073	1.96e-169	3	TXNDC5
5.66e-172	0.286914	0.176	0.079	1.13e-167	3	CDK14
4.94e-171	0.483427	0.335	0.207	9.84e-167	3	NFKBIB
3.04e-170	0.476256	0.566	0.447	6.06e-166	3	OSER1
6.02e-170	0.417049	0.57	0.447	1.2e-165	3	ENSCHIG00000012914
7.63e-170	0.372058	0.212	0.107	1.52e-165	3	HNMT
9.6e-170	0.458854	0.408	0.289	1.91e-165	3	FUCA1
2.03e-169	0.546896	0.558	0.411	4.05e-165	3	TIPARP
5.08e-167	0.267763	0.539	0.39	1.01e-162	3	MFGE8
1.09e-165	0.412065	0.152	0.066	2.16e-161	3	SMOC2
2.93e-164	0.432246	0.188	0.091	5.83e-160	3	ZBTB1
1.48e-163	0.327789	0.197	0.094	2.94e-159	3	FN1
2.4e-162	0.394824	0.495	0.354	4.77e-158	3	TSC22D1
1.46e-161	0.463568	0.354	0.229	2.91e-157	3	ZC3H12A
1.67e-160	0.311045	0.168	0.076	3.33e-156	3	ENSCHIG00000026534
3.35e-160	0.685171	0.706	0.581	6.66e-156	3	DUSP1
5.16e-160	0.422534	0.434	0.309	1.03e-155	3	MPZL1
5.21e-156	0.289127	0.224	0.113	1.04e-151	3	SYNE1
5.21e-155	0.514738	0.452	0.331	1.04e-150	3	SLC20A1
3.03e-154	0.44682	0.31	0.193	6.03e-150	3	PBX3
4.6e-154	0.380422	0.51	0.377	9.15e-150	3	POFUT2
2.18e-152	0.318388	0.161	0.074	4.34e-148	3	FZD7
1.47e-151	0.338039	0.243	0.134	2.92e-147	3	RORA
1.94e-151	0.437462	0.503	0.363	3.86e-147	3	ANXA1
5.1e-151	0.283633	0.907	0.831	1.02e-146	3	ENSCHIG00000013515
1.21e-150	0.306198	0.851	0.776	2.41e-146	3	EIF4G2
1.1e-149	0.48832	0.606	0.493	2.2e-145	3	RBBP6
7.38e-148	0.341571	0.733	0.632	1.47e-143	3	ENSCHIG00000005522
2.4e-146	0.380484	0.357	0.236	4.78e-142	3	ARFGAP1
9.05e-146	0.396225	0.427	0.312	1.8e-141	3	TMEM59
1.45e-145	0.447475	0.382	0.262	2.88e-141	3	NUFIP2
3.36e-145	0.256314	0.122	0.05	6.69e-141	3	MYLIP
4.92e-142	0.312679	0.176	0.087	9.8e-138	3	NFKB1
1.36e-141	0.273239	0.148	0.066	2.7e-137	3	DUSP26
7.54e-140	0.362078	0.401	0.267	1.5e-135	3	PYCR1
2.58e-139	0.381845	0.518	0.4	5.14e-135	3	RCN2
4.17e-139	0.384004	0.348	0.228	8.3e-135	3	EPB41L2
1.35e-138	0.272728	0.696	0.58	2.7e-134	3	OAZ1
1.06e-137	0.357478	0.296	0.183	2.1e-133	3	PTPRG
2.82e-137	0.393157	0.43	0.307	5.62e-133	3	TUBB2A
3.57e-137	0.400731	0.397	0.284	7.12e-133	3	DNAJC1
7.28e-137	0.34647	0.414	0.278	1.45e-132	3	SLC22A17
3.08e-136	0.694906	0.358	0.241	6.14e-132	3	GADD45G
5.19e-135	0.264681	0.121	0.051	1.03e-130	3	CAPN5
1.39e-134	0.250713	0.129	0.056	2.76e-130	3	ITGA9
2.11e-134	0.292715	0.157	0.073	4.2e-130	3	GUCY1A1
2.74e-134	0.420883	0.175	0.085	5.46e-130	3	ENSCHIG00000011424
1.12e-133	0.499957	0.41	0.297	2.23e-129	3	KIAA1551
2.31e-133	0.279717	0.154	0.074	4.61e-129	3	INTS6
5.83e-131	0.381329	0.259	0.157	1.16e-126	3	SEC24A
2.16e-130	0.28285	0.111	0.046	4.31e-126	3	ARHGAP20
3.39e-130	0.35209	0.336	0.216	6.75e-126	3	TNS2
9.3e-130	0.438065	0.252	0.156	1.85e-125	3	MAPK6
1.81e-128	0.266433	0.22	0.119	3.61e-124	3	PLSCR4
7.69e-128	0.258417	0.226	0.126	1.53e-123	3	SFRP1
5.99e-126	0.362308	0.507	0.394	1.19e-121	3	SLC39A7
1.47e-125	0.372349	0.456	0.356	2.94e-121	3	YIF1A
3.59e-125	0.380434	0.542	0.432	7.15e-121	3	S100A10
6.92e-123	0.275499	0.14	0.065	1.38e-118	3	PLCL1
2.31e-122	0.259395	0.213	0.115	4.6e-118	3	COL4A2
2.48e-121	0.315535	0.587	0.488	4.95e-117	3	TMED4
1.53e-119	0.331763	0.238	0.142	3.05e-115	3	GULP1
1.75e-119	0.353501	0.257	0.158	3.49e-115	3	CFLAR
1.98e-118	0.287119	0.108	0.047	3.93e-114	3	NT5E
1.67e-117	0.425717	0.271	0.171	3.33e-113	3	SMAD7
3.17e-117	0.382271	0.32	0.218	6.32e-113	3	ENSCHIG00000014195
1.22e-115	0.273267	0.159	0.081	2.43e-111	3	CBLB
2.85e-114	0.339247	0.479	0.38	5.69e-110	3	RFNG
8.2e-114	0.405592	0.446	0.345	1.63e-109	3	ENSCHIG00000027173
1.8e-113	0.322182	0.265	0.165	3.59e-109	3	PHACTR2
1.74e-112	0.263571	0.314	0.2	3.47e-108	3	SLC40A1
6.43e-111	0.324721	0.202	0.117	1.28e-106	3	ATF6
8.79e-111	0.30945	0.617	0.526	1.75e-106	3	DDX31
1.62e-108	0.381782	0.428	0.332	3.23e-104	3	ITGAV
1.75e-106	0.277684	0.439	0.316	3.48e-102	3	TUSC3
2.14e-106	0.362259	0.376	0.276	4.26e-102	3	LMF2
2.96e-104	0.280418	0.222	0.13	5.89e-100	3	WNT5A
3.84e-103	0.345173	0.341	0.243	7.64e-99	3	NR3C1
5.8e-103	0.346995	0.402	0.31	1.16e-98	3	BDH2
6.27e-102	0.513328	0.519	0.438	1.25e-97	3	BAG3
6.54e-102	0.310644	0.776	0.7	1.3e-97	3	SFPQ
2.62e-101	0.256751	0.125	0.06	5.22e-97	3	NRXN2
9.76e-100	0.285901	0.212	0.128	1.94e-95	3	ENSCHIG00000017277
2.72e-99	0.638367	0.129	0.063	5.41e-95	3	ANGPTL1
6.32e-95	0.332415	0.369	0.278	1.26e-90	3	HM13
1.72e-93	0.288648	0.127	0.065	3.42e-89	3	ENSCHIG00000017205
7.04e-93	0.321764	0.291	0.2	1.4e-88	3	PCBD1
2.97e-92	0.284316	0.432	0.339	5.91e-88	3	RNF130
1.09e-90	0.308242	0.351	0.256	2.18e-86	3	ASPH
2.21e-90	0.26126	0.154	0.084	4.41e-86	3	EPB41L3
6.46e-90	0.503178	0.215	0.134	1.29e-85	3	ENSCHIG00000019796
4.25e-89	0.281077	0.272	0.182	8.47e-85	3	ADD1
6.2e-89	0.278915	0.3	0.207	1.23e-84	3	CBR3
1.02e-88	0.519229	0.501	0.409	2.04e-84	3	HES1
9.65e-88	0.331178	0.822	0.737	1.92e-83	3	GPX1
3.21e-87	0.528254	0.355	0.272	6.4e-83	3	DDIT3
3.44e-87	0.483388	0.158	0.088	6.84e-83	3	ENSCHIG00000017153
6.62e-87	0.257023	0.16	0.091	1.32e-82	3	CD164
3.11e-86	0.332898	0.397	0.305	6.19e-82	3	PCF11
1.3e-85	0.377322	0.383	0.299	2.58e-81	3	HDLBP
8.74e-85	0.332524	0.336	0.253	1.74e-80	3	DNAJC3
2.63e-84	0.33268	0.412	0.33	5.25e-80	3	SEC61A1
1.22e-82	0.383721	0.303	0.226	2.43e-78	3	C21orf91
1.23e-81	0.293646	0.297	0.211	2.45e-77	3	SLC29A1
1.94e-81	0.383742	0.502	0.419	3.87e-77	3	PNRC1
2.96e-81	0.263299	0.676	0.609	5.89e-77	3	APLP2
3.95e-81	0.289162	0.556	0.475	7.87e-77	3	ENSCHIG00000007393
3.36e-80	0.298072	0.154	0.091	6.7e-76	3	PCSK6
4.04e-80	0.313506	0.26	0.178	8.04e-76	3	ZMIZ1
2.87e-78	0.254825	0.188	0.117	5.72e-74	3	ERLEC1
5.96e-78	0.297989	0.446	0.367	1.19e-73	3	LMAN1
1.95e-75	0.266205	0.209	0.134	3.89e-71	3	ENSCHIG00000010064
5.19e-75	0.334957	0.372	0.291	1.03e-70	3	RASSF8
7.98e-75	0.261144	0.49	0.415	1.59e-70	3	CYBA
9.2e-75	0.315319	0.491	0.395	1.83e-70	3	ID4
4.33e-74	0.292753	0.488	0.416	8.62e-70	3	COPG1
3.77e-72	0.276822	0.235	0.161	7.51e-68	3	SLC35F5
3.89e-71	0.295545	0.208	0.137	7.74e-67	3	MAN2A1
1.82e-70	0.285477	0.229	0.156	3.63e-66	3	UGCG
1.6e-69	0.264257	0.197	0.128	3.18e-65	3	PRRC1
1.01e-67	0.260064	0.179	0.113	2.01e-63	3	ENSCHIG00000017997
3.51e-66	0.344388	0.384	0.314	6.99e-62	3	CDKN2AIP
3.6e-65	0.268716	0.573	0.526	7.17e-61	3	CAD
4.54e-64	0.271131	0.19	0.126	9.04e-60	3	GMPPA
5.48e-64	0.284647	0.253	0.182	1.09e-59	3	MED13
2.4e-62	0.287479	0.332	0.266	4.78e-58	3	BET1
2.98e-62	0.252558	0.195	0.13	5.94e-58	3	ENSCHIG00000026771
7.6e-62	0.282967	0.322	0.254	1.51e-57	3	TFDP2
1.71e-61	0.320403	0.481	0.426	3.4e-57	3	ATP2B1
6.26e-61	0.335132	0.124	0.071	1.25e-56	3	ARSI
7.84e-60	0.253802	0.193	0.129	1.56e-55	3	ITSN1
3.67e-59	0.265347	0.17	0.11	7.31e-55	3	ENSCHIG00000009161
5.92e-59	0.305656	0.207	0.145	1.18e-54	3	SLC39A6
5.89e-58	0.284052	0.145	0.09	1.17e-53	3	ANKRD28
1.09e-57	0.310848	0.252	0.188	2.17e-53	3	PRDM2
1.22e-57	0.26372	0.207	0.143	2.44e-53	3	PTTG1IP
2.57e-56	0.326971	0.283	0.211	5.12e-52	3	BAMBI
5.16e-56	0.282564	0.261	0.198	1.03e-51	3	CAPN2
1.1e-55	0.253068	0.171	0.114	2.18e-51	3	INO80D
6.58e-55	0.258122	0.254	0.188	1.31e-50	3	B4GALT5
8.52e-55	0.899942	0.904	0.866	1.7e-50	3	FOS
2.05e-54	0.251139	0.423	0.362	4.09e-50	3	SEC63
7.37e-54	0.256712	0.418	0.363	1.47e-49	3	RAB2A
9.55e-54	0.308101	0.211	0.154	1.9e-49	3	ENSCHIG00000020130
1.06e-53	0.279846	0.261	0.202	2.1e-49	3	ALG5
6.39e-49	0.270968	0.327	0.265	1.27e-44	3	TTC3
1.89e-48	0.410659	0.323	0.258	3.77e-44	3	HSP70.1
4.86e-46	0.27721	0.261	0.204	9.69e-42	3	SUCO
7.64e-44	0.301959	0.228	0.173	1.52e-39	3	CPEB2
3.84e-42	0.250804	0.394	0.347	7.65e-38	3	CAST
1.18e-41	0.322631	0.887	0.838	2.36e-37	3	ENSCHIG00000024945
6.51e-39	0.28687	0.418	0.38	1.3e-34	3	CDV3
2.6e-37	0.266417	0.182	0.135	5.18e-33	3	WHAMM
0	5.543	0.998	0.418	0	4	ACTG2
0	5.3241	0.995	0.339	0	4	DES
0	5.25029	0.998	0.157	0	4	MYH11
0	4.99582	0.994	0.235	0	4	CNN1
0	4.79503	0.996	0.458	0	4	TPM2
0	4.4378	0.986	0.231	0	4	MYLK
0	4.36372	0.924	0.058	0	4	PCP4
0	3.74885	0.993	0.63	0	4	CSRP1
0	3.71626	0.875	0.072	0	4	SMTN
0	3.62658	0.975	0.249	0	4	ACTA2
0	3.4381	0.891	0.155	0	4	ENSCHIG00000020204
0	3.37911	0.462	0.027	0	4	ACTC1
0	2.96296	0.981	0.598	0	4	CALD1
0	2.87153	0.977	0.839	0	4	MYL6B
0	2.69579	0.677	0.068	0	4	SYNM
0	2.67564	0.95	0.348	0	4	PDLIM7
0	2.54857	0.655	0.057	0	4	SORBS2
0	2.46017	0.88	0.188	0	4	NEXN
0	2.2907	0.863	0.313	0	4	CKB
0	2.24728	0.881	0.376	0	4	CFL2
0	2.10669	0.617	0.056	0	4	ENSCHIG00000020169
0	2.04755	0.793	0.304	0	4	SLC25A4
0	1.97783	0.566	0.015	0	4	ENSCHIG00000025880
0	1.93158	0.999	0.977	0	4	ACTB
0	1.90517	0.725	0.132	0	4	FILIP1
0	1.87481	0.615	0.058	0	4	TAGLN
0	1.86475	0.677	0.084	0	4	MRGPRF
0	1.82374	0.798	0.325	0	4	DSTN
0	1.72045	0.58	0.088	0	4	FBXO32
0	1.71309	0.898	0.294	0	4	CAV1
0	1.64272	0.855	0.478	0	4	PPP1R12A
0	1.63629	0.631	0.243	0	4	ENSCHIG00000022407
0	1.62792	0.614	0.093	0	4	MSRB3
0	1.60855	0.798	0.281	0	4	HSPB8
0	1.6052	0.453	0.021	0	4	SYNPO2
0	1.56404	0.59	0.109	0	4	LPP
0	1.55249	0.607	0.152	0	4	ENSCHIG00000021774
0	1.55209	0.649	0.182	0	4	INPP5A
0	1.52078	0.966	0.873	0	4	HSPB1
0	1.49156	0.704	0.239	0	4	PLEKHO1
0	1.47344	0.116	0.016	0	4	MYL4
0	1.46926	0.457	0.011	0	4	ENSCHIG00000018188
0	1.453	0.509	0.158	0	4	TES
0	1.43292	0.859	0.466	0	4	FERMT2
0	1.42706	0.504	0.103	0	4	PPP1R12C
0	1.4139	0.58	0.17	0	4	ACTN1
0	1.38602	0.974	0.421	0	4	POSTN
0	1.38453	0.651	0.179	0	4	ARHGEF25
0	1.37056	0.651	0.433	0	4	ENSCHIG00000012599
0	1.33266	0.416	0.027	0	4	NACC2
0	1.32026	0.435	0.066	0	4	PLCB4
0	1.31866	0.537	0.152	0	4	TACC2
0	1.30959	0.625	0.263	0	4	TLN1
0	1.2991	0.599	0.151	0	4	SEMA3C
0	1.28632	0.458	0.06	0	4	ITGA7
0	1.27801	0.345	0.071	0	4	NPNT
0	1.27777	0.707	0.238	0	4	NCAM1
0	1.26508	0.717	0.513	0	4	ENSCHIG00000007355
0	1.24371	0.398	0.014	0	4	ASB2
0	1.22333	0.482	0.111	0	4	CAMK2G
0	1.21424	0.539	0.156	0	4	AK1
0	1.1957	0.348	0.012	0	4	IL17B
0	1.16909	0.381	0.067	0	4	ST6GAL2
0	1.16343	0.526	0.133	0	4	BCHE
0	1.1491	0.655	0.286	0	4	MEIS2
0	1.1457	0.343	0.058	0	4	KLHL23
0	1.13111	0.379	0.038	0	4	LSAMP
0	1.12909	0.838	0.369	0	4	SPARCL1
0	1.11317	0.517	0.202	0	4	CCDC107
0	1.11172	0.775	0.521	0	4	ENSCHIG00000014929
0	1.09135	0.347	0.015	0	4	LMOD1
0	1.08716	0.461	0.115	0	4	HACD1
0	1.08148	0.437	0.107	0	4	PHLDB2
0	1.06977	0.43	0.135	0	4	SLMAP
0	1.06011	0.338	0.007	0	4	CCDC190
0	1.04669	0.314	0.004	0	4	BVES
0	1.04599	0.502	0.105	0	4	RCAN2
0	1.03125	0.425	0.088	0	4	COX7A1
0	1.02272	0.59	0.24	0	4	CAVIN3
0	1.02026	0.457	0.13	0	4	BEND5
0	1.00396	0.375	0.056	0	4	TOX
0	1.00365	0.442	0.106	0	4	CAP2
0	0.997198	0.296	0.021	0	4	SORCS1
0	0.990866	0.599	0.277	0	4	CAMK1
0	0.977362	0.365	0.032	0	4	ENSCHIG00000025796
0	0.973443	0.428	0.156	0	4	RALGPS2
0	0.969104	0.729	0.511	0	4	ENSCHIG00000025972
0	0.965008	0.39	0.063	0	4	PPP1R14A
0	0.964577	0.563	0.23	0	4	LAMB2
0	0.963605	0.487	0.141	0	4	FMOD
0	0.963092	0.328	0.059	0	4	ITGA1
0	0.960827	0.498	0.162	0	4	RRAS
0	0.958661	0.422	0.188	0	4	PKN2
0	0.957413	0.582	0.318	0	4	RGMB
0	0.95452	0.751	0.463	0	4	CAVIN1
0	0.952334	0.68	0.404	0	4	OCIAD2
0	0.951536	0.32	0.035	0	4	RIMS1
0	0.944903	0.399	0.133	0	4	SRF
0	0.944562	0.647	0.402	0	4	CUX1
0	0.917626	0.356	0.079	0	4	PDE5A
0	0.91346	0.378	0.117	0	4	NCS1
0	0.905668	0.316	0.064	0	4	DNAJB5
0	0.904295	0.35	0.063	0	4	PGM5
0	0.902166	0.488	0.278	0	4	MACF1
0	0.899974	0.525	0.292	0	4	TNRC18
0	0.897835	0.371	0.085	0	4	PRKRA
0	0.886983	0.797	0.609	0	4	ITGB1
0	0.886554	0.851	0.551	0	4	LGALS1
0	0.886479	0.491	0.233	0	4	SVIL
0	0.884474	0.376	0.145	0	4	VCL
0	0.874485	0.652	0.186	0	4	CRYAB
0	0.868602	0.364	0.107	0	4	LYNX1
0	0.862217	0.317	0.073	0	4	NDRG4
0	0.854398	0.293	0.066	0	4	ADAMTSL4
0	0.845106	0.343	0.057	0	4	SSPN
0	0.840811	0.403	0.13	0	4	PKDCC
0	0.827418	0.259	0.012	0	4	MYL9
0	0.823298	0.252	0.014	0	4	HPSE2
0	0.821438	0.249	0.024	0	4	PDZRN4
0	0.819348	0.519	0.225	0	4	SMARCD3
0	0.818163	0.629	0.212	0	4	GEM
0	0.812368	0.572	0.344	0	4	WDR1
0	0.811669	0.311	0.102	0	4	ANKRD50
0	0.80277	0.495	0.256	0	4	ENSCHIG00000006062
0	0.799032	1	0.99	0	4	COX1
0	0.797823	0.339	0.096	0	4	ENSCHIG00000017456
0	0.795934	0.297	0.06	0	4	EML1
0	0.791367	0.286	0.069	0	4	PDE4DIP
0	0.787854	0.344	0.104	0	4	PDE4D
0	0.776499	0.315	0.088	0	4	SHF
0	0.774372	0.302	0.058	0	4	LMO3
0	0.774189	0.78	0.496	0	4	PITX1
0	0.768026	0.264	0.038	0	4	WFIKKN2
0	0.767991	0.355	0.126	0	4	CDC42BPA
0	0.764475	0.589	0.393	0	4	SELENOM
0	0.76323	0.54	0.328	0	4	CAPZA2
0	0.760116	0.653	0.461	0	4	NDUFS7
0	0.759785	0.601	0.267	0	4	DPYSL3
0	0.758731	0.281	0.063	0	4	EGLN3
0	0.752112	0.518	0.235	0	4	ITIH5
0	0.747033	0.227	0.016	0	4	DUSP27
0	0.743089	0.309	0.096	0	4	NECTIN3
0	0.74207	0.349	0.087	0	4	FRZB
0	0.741281	0.274	0.054	0	4	RBM38
0	0.739126	0.36	0.12	0	4	PDZRN3
0	0.73102	0.367	0.148	0	4	CORO1C
0	0.728188	0.391	0.139	0	4	TACC1
0	0.727475	0.236	0.031	0	4	GABRA1
0	0.722965	0.342	0.135	0	4	PRKAG2
0	0.72149	0.218	0.016	0	4	SORBS1
0	0.701243	0.26	0.064	0	4	NRP2
0	0.700791	0.408	0.198	0	4	PDLIM5
0	0.693835	0.186	0.01	0	4	DTNA
0	0.690885	0.277	0.056	0	4	ANGPTL1
0	0.690323	0.486	0.235	0	4	CAV2
0	0.685523	0.33	0.118	0	4	CIB2
0	0.668438	0.44	0.235	0	4	MAP7D1
0	0.666989	0.301	0.11	0	4	SYNE1
0	0.664523	0.295	0.107	0	4	TNC
0	0.6642	0.234	0.049	0	4	BAG2
0	0.662714	0.635	0.394	0	4	CHCHD10
0	0.660259	0.224	0.02	0	4	BTC
0	0.657769	0.998	0.966	0	4	ND1
[truncated: 22,028 more rows]

## Sheet: Table S5
Table S5. Gene markers for the cell subtypes and the cell numbers at the 17 timepionts in the rumen tissues of sheep.
Clusters	Cell subtype names	Abbreviation	Gene markers	e45	e60	e75	e90	e105	e120	e135	d0	d7	d14	d21	d28	d35	d42	d49	d56	d90
0	Basal cells_CA1_high	BC3_CA1+	KRT15,KRT5	0	0	0	0	0	0	0	1	7	61	74	79	12	10196	6773	1699	312
1	Fibroblast_DLK1_high	Fib1_DLK1+	LUM,DCN,DLK1,COL8A1	42	242	5841	4874	6906	848	244	16	18	6	4	0	72	0	2	0	0
2	Stromal cells_POSTN_high	Stroma1_POSTN+	POSTN,MDK,TCF21	5148	7540	149	59	78	2	0	0	0	0	0	0	0	0	0	0	0
3	Mural cells	M	RASL11A,ADAMTS4	69	121	193	217	331	305	523	36	271	521	332	54	7559	193	138	140	0
4	Endothelial	E	PLVAP, PECAM1	167	73	71	256	126	183	267	124	446	2005	539	98	3810	793	275	502	55
5	Spinous cells_KRT17_high	SC7_KRT17+	S100A8,KRT17,SFN,KRT15	0	0	0	0	0	0	0	0	0	91	7	340	1	1790	1349	5432	48
6	Basal cells_IGFBP6_high	BC2_IGFBP6+	KRT15,KRT5	0	4	1217	948	3356	2898	126	4	3	0	0	0	0	0	0	0	0
7	Granular cells_S100A8_high	GC2_S100A8+	S100A8,KRT17,SFN,KRT15-	9	6	8	27	0	6	23	8	113	250	443	443	39	3198	1482	1452	183
8	Spinous cells_IGFBP6_high	SC2_IGFBP6+	S100A8,KRT17,SFN,KRT15	1	13	19	145	78	2190	4796	8	5	2	3	0	0	0	0	0	0
9	Fibroblast_PLAC9_high	Fib2_PLAC9+	LUM,DCN,CXCL14,MGP	0	16	602	940	868	2765	1589	15	28	36	7	1	0	0	0	0	0
10	Fibroblast_MFAP5_high	Fib4_MFAP5+	LUM,DCN,DLK1,MFAP5	1	4	12	108	36	909	659	34	10	1137	489	58	2426	300	318	192	2
11	Spinous cells_ALDH1A1_high	SC4_ALDH1A1+	DAPL1,KRT15	0	0	0	0	0	0	3	3	6101	16	0	8	0	1	0	0	0
12	Spinous cells_IGFBP2_high	SC3_IGFBP2+	DAPL1,KRT15	0	0	0	2	0	4	2	5491	32	1	0	0	0	0	0	0	0
13	Basal cells_SELENBP1_high	BC4_SELENBP1+	KRT15,KRT5	0	0	0	0	0	0	0	0	0	0	2	3	1	4	6	51	5224
14	Neuroendocrine	NEC	CDH19,CRYAB,APOD	6	8	73	340	67	376	194	32	28	2737	649	11	510	53	52	94	0
15	Spinous cells_KRT15_high	SC5_KRT15+	DAPL1,KRT15	0	0	0	0	0	0	0	2	45	801	4296	7	2	12	13	2	2
16	Spinous cells_FABP4_high	SC6_FABP4+	DAPL1,KRT15	0	0	0	0	0	0	0	0	1	8	1	4336	0	43	5	35	0
17	Smooth muscle cells	SMC	ACTG2,MYH11	435	245	212	497	427	684	573	15	8	957	31	8	2	3	70	10	0
18	T cells	T	CORO1A,CXCR4	12	8	11	19	9	13	15	4	25	442	547	93	87	766	1482	313	288
19	Granular cells_KRTDAP_high	GC1_KRTDAP+	SPINK5,KRTDAP,DAPL1	0	0	0	0	0	7	25	3344	3	0	0	0	0	0	0	0	0
20	Mitotic cells	MC	TOP2A	958	711	445	237	395	125	105	3	4	195	18	1	52	1	6	0	0
21	Spinous cells_AGR2_high	SC1_AGR2+	KRT15,SFN,SPINK5	788	1234	337	291	521	38	8	0	1	0	0	0	0	0	0	0	0
22	B cells	B	CXCL8,IL1B	82	117	90	110	144	35	62	14	47	385	602	89	560	119	408	62	78
23	Stromal cells_PTN_high	Stroma2_PTN+	CRABP1	892	213	467	492	175	21	97	0	0	14	0	0	4	0	0	0	0
24	Basal cells_FABP4_high	BC1_FABP4+	KRT15,KRT5-	69	263	62	251	39	95	45	14	29	194	161	704	0	14	2	5	35
25	Proliferating basal cells	PBC	KRT15,KRT5	104	64	56	43	125	95	220	156	682	33	92	1	0	1	1	0	0
26	Interstitial cells of Cajal	ICC	KIT,ETV1	596	218	178	248	228	50	7	0	0	3	1	0	0	0	1	0	0
27	Granular cells_KRTDAP_high	GC1_KRTDAP+	SPINK5,KRTDAP,DAPL1	8	32	41	145	17	160	100	857	142	6	0	0	0	0	0	0	0
28	Neurons	Neu	STMN2,CRABP1,HAND2	734	220	98	172	44	85	10	0	2	39	2	0	0	0	0	0	0
29	Fibroblast_APOD_high	Fib3_APOD+	LUM,DCN,CXCL14	0	0	0	1	0	10	11	392	893	22	12	1	1	0	1	3	0
30	Spinous cells_AGR2_high	SC1_AGR2+	KRT15,SFN,SPINK5	48	111	82	60	123	49	6	0	0	0	0	0	0	0	0	0	0
31	Enteroendocrine	ECC	SCG3,CHGA	38	120	64	7	38	17	1	26	0	2	1	0	0	0	0	0	0

## Sheet: Table S6
Table S6. Gene markers for the cell subtypes and the cell numbers at the 17 timepionts in the rumen tissues of goats.
Clusters	Cell subtype names	Abbreviation	Gene markers	e45	e60	e75	e90	e105	e120	e135	d0	d7	d14	d21	d28	d35	d42	d49	d56	d90
0	Endothelial	E	PLVAP,PECAM1	45	78	100	108	136	146	1720	229	400	391	766	1550	852	1043	946	1731	146
1	Basal cells_KRT8_high	BC1_KRT8+	KRT15,KRT5,KRT8	58	1006	814	1996	1445	1856	1961	81	66	15	0	0	0	0	0	0	0
2	Spinous cells_KRT4_high	SC2_KRT4+	KRT15,KRT4,SPINK5,KRT5-	37	54	46	267	108	383	6236	45	74	38	18	37	35	42	19	16	3
3	Fibroblast_TNFAIP6_high	Fib7_TNFAIP6+	LUM,DCN,MGP,MFAP5,COL8A1,ASPN	0	0	0	2	1	14	8	17	47	1404	271	279	2512	457	1094	271	76
4	Smooth muscle cells	SMC	ACTG2,MYH11	4	89	104	199	183	919	706	383	456	370	146	284	1091	688	251	196	67
5	Mural cells	M	RASL11A,ADAMTS4	6	29	106	58	78	294	225	185	260	172	591	1035	791	596	351	904	295
6	Fibroblast_NES_high	Fib2_NES+	LUM,DCN,NES,COL8A1	1	1486	3998	203	71	19	10	9	8	12	0	3	0	0	0	0	0
7	Fibroblast_ASPN_high	Fib4_ASPN+	LUM,DCN,ASPN,PTN,MGP,MFAP5	3	134	58	3255	1717	336	52	25	2	13	1	1	1	2	2	1	0
8	Basal cells_CA3_high	BC2_CA3+	KRT15,KRT5	0	0	0	0	0	0	1	5	22	443	2491	23	1050	1491	8	1	0
9	Spinous cells_DAPL1_high	SC4_DAPL1+	KRT15,KRT17,DAPL1,KRT4-	0	3	3	2	1	2	10	1	17	41	209	2973	94	269	1363	52	18
10	Fibroblast_COL8A1_high	Fib3_COL8A1+	LUM,DCN,COL8A1,ASPN	15	312	488	834	1446	991	228	124	62	75	22	107	30	35	66	30	6
11	Granular cells_KRT4_high	GC1_KRT4+	KRT4,SPINK5	0	0	0	1	0	0	2	116	1073	213	2146	46	563	674	3	25	0
12	Fibroblast_PENK_high	Fib5_PENK+	LUM,DCN,CXCL14,PENK	0	15	41	158	797	745	356	469	133	175	60	363	103	199	681	71	22
13	Fibroblast_MFAP5_high	Fib6_MFAP5+	LUM,DCN,ASPN,MFAP5,MGP	0	0	0	4	16	24	52	3169	364	586	11	34	19	4	23	2	0
14	Basal cells_AREG_high	BC3_AREG+	KRT15,KRT5	0	0	0	0	0	0	0	0	0	0	2	56	14	15	11	3915	19
15	POSTN stromal cells	Stroma1_POSTN+	POSTN,MDK,TCF21	3726	55	34	12	6	8	4	1	0	0	0	0	0	0	0	1	1
16	Spinous cells_CA3_high	SC3_CA3+	KRT15,KRT17,DAPL1,KRT4	0	0	0	0	3	3	5	1085	2306	272	2	0	4	4	1	0	0
17	Granular cells_RBP2_high	GC2_RBP2+	DAPL1,KRT17,RBP2	0	0	0	0	0	1	3	6	42	50	91	222	76	937	2057	73	19
18	Neuroendocrine	NEC	CDH19,CRYAB,APOD	2	31	108	94	20	168	61	220	156	279	66	169	316	639	358	218	252
19	Fibroblast_PTN_high	Fib1_PTN+	LUM,DCN,PTN,NES,ASPN,MFAP5	138	2364	205	54	13	24	0	1	2	0	0	0	0	0	0	0	0
20	Proliferating basal cells	PBC	KRT15,KRT5	44	36	32	128	75	101	116	55	599	290	613	74	206	197	31	14	3
21	Endothelial	E	PLVAP, PECAM1	0	0	0	0	0	0	0	0	0	0	0	1	0	0	2	0	1830
22	Stromal cells_PTN_high	Stroma2_PTN+	PTN,CRABP1	1810	13	0	0	0	0	0	0	0	0	0	0	0	0	0	0	0
23	Basal cells_AREG_high	BC3_AREG+	KRT15,KRT5	0	0	0	0	0	0	0	0	0	0	0	0	0	0	0	2	1413
24	Mural cells	M	RASL11A,ADAMTS4	0	0	0	0	0	0	0	0	0	0	0	0	0	0	3	0	1352
25	T cells	T	CORO1A,CXCR4,IL1B-,CXCL8-	4	111	23	41	51	33	19	18	14	330	55	60	140	52	34	62	277
26	B cells	B	CXCL8,IL1B	101	345	125	92	67	35	54	33	21	146	8	37	31	49	27	61	51
27	Mitotic cells	MC	TOP2A	419	156	175	99	79	50	23	28	27	42	24	13	4	28	5	5	4
28	Neurons	Neu	STMN2,CRABP1	877	56	29	7	0	1	0	0	0	0	1	0	0	0	0	0	0
29	Fibroblast_MGP_high	Fib8_MGP+	LUM,DCN,CXCL14,MGP,MFAP5,COL8A1,ASPN	0	0	0	0	0	0	0	0	0	0	0	0	0	0	0	0	809
30	Spinous cells_KRT8_high	SC1_KRT8+	KRT15,KRT8,KRT5-	672	38	27	4	2	1	2	0	1	1	0	0	0	0	0	1	0
31	Interstitial cells of Cajal	ICC	KIT,ETV1	3	104	178	114	126	86	9	6	20	10	6	9	30	27	8	3	2
32	T cells	T	CORO1A,CXCR4,IL1B-,CXCL8-	20	215	18	40	21	10	0	0	0	4	0	1	7	0	2	0	3
33	Lymphatic endothelial cells	LEC	CCL21,LYVE1	3	11	3	10	2	16	43	5	46	16	9	17	3	10	30	16	22
34	Fibroblast_MGP_high	Fib8_MGP+	LUM,DCN,CXCL14,MGP,MFAP5,COL8A1,ASPN	0	0	0	0	0	0	0	0	0	0	0	0	0	0	0	221	0
35	Spinous cells_CA3_high	SC3_CA3+	KRT15,KRT17,DAPL1,KRT4	0	0	0	0	0	32	2	87	16	30	0	0	0	4	0	0	0
36	Enteroendocrine	ECC	SCG3,CHGA	53	26	2	8	1	1	2	2	0	0	0	0	0	0	0	0	0

## Sheet: Table S7
Table S7. Genes for the cell subtypes defined by rumen scRNA-seq data in sheep.
The column name annotation: p_val (p_value); avg_logFC (average log fold change); pct.1 (ratio of cells in this cluster that expressed the gene); pct.2 (ratio of cells in the rest of clusters that expressed the gene); p_val_adj (Bonferroni corrected p_value).
P_val	Avg_log2FC	Pct.1	Pct.2	P_val_adj	Cell types	Genes
0	2.72101	0.927	0.116	0	Proliferating basal cells	ENSOARG00020016578
0	2.27211	0.893	0.112	0	Proliferating basal cells	TOP2A
0	2.23594	0.936	0.256	0	Proliferating basal cells	CKS2
0	1.99978	0.922	0.18	0	Proliferating basal cells	ENSOARG00020010052
0	1.98707	0.997	0.538	0	Proliferating basal cells	ENSOARG00020006888
0	1.97976	0.888	0.112	0	Proliferating basal cells	TPX2
0	1.95683	0.959	0.496	0	Proliferating basal cells	UBE2S
0	1.90855	0.713	0.071	0	Proliferating basal cells	ENSOARG00020003927
0	1.76165	0.707	0.057	0	Proliferating basal cells	CDC20
0	1.74717	0.792	0.062	0	Proliferating basal cells	CCNB2
0	1.72581	0.907	0.498	0	Proliferating basal cells	SMG1
0	1.64795	0.999	0.791	0	Proliferating basal cells	H2AZ2
0	1.63144	0.964	0.349	0	Proliferating basal cells	ENSOARG00020010317
0	1.62825	0.898	0.109	0	Proliferating basal cells	SPC24
0	1.60372	0.788	0.065	0	Proliferating basal cells	ENSOARG00020025232
0	1.60262	0.751	0.075	0	Proliferating basal cells	ENSOARG00020009616
0	1.59453	0.705	0.045	0	Proliferating basal cells	ENSOARG00020022464
0	1.56224	0.702	0.156	0	Proliferating basal cells	ENSOARG00020000929
0	1.55792	0.839	0.181	0	Proliferating basal cells	KIF20B
0	1.54925	0.765	0.074	0	Proliferating basal cells	ENSOARG00020007281
0	1.53803	0.997	0.709	0	Proliferating basal cells	H2AZ1
0	1.51514	0.77	0.062	0	Proliferating basal cells	KIF23
0	1.39315	0.959	0.433	0	Proliferating basal cells	CALM2.2
0	1.35462	0.801	0.171	0	Proliferating basal cells	SMC2
0	1.31033	0.777	0.093	0	Proliferating basal cells	ENSOARG00020023797
0	1.30499	0.923	0.431	0	Proliferating basal cells	ALDH1A1
0	1.28851	0.963	0.427	0	Proliferating basal cells	KRT15
0	1.28567	0.994	0.729	0	Proliferating basal cells	NUCKS1
0	1.27746	0.704	0.083	0	Proliferating basal cells	CKAP2
0	1.27555	0.811	0.207	0	Proliferating basal cells	CD24
0	1.2422	0.799	0.201	0	Proliferating basal cells	SMC4
0	1.23268	0.655	0.059	0	Proliferating basal cells	PRC1
0	1.21971	0.944	0.366	0	Proliferating basal cells	ENSOARG00020023265
0	1.21161	0.978	0.603	0	Proliferating basal cells	ENSOARG00020010357
0	1.20009	0.876	0.33	0	Proliferating basal cells	CKS1B
0	1.19651	0.682	0.175	0	Proliferating basal cells	ENSOARG00020014748
0	1.15527	0.634	0.049	0	Proliferating basal cells	AURKB
0	1.15432	0.65	0.204	0	Proliferating basal cells	CLDN4
0	1.15167	0.978	0.543	0	Proliferating basal cells	IGFBP2
0	1.13479	0.822	0.142	0	Proliferating basal cells	MND1
0	1.13347	0.73	0.085	0	Proliferating basal cells	DIAPH3
0	1.1321	0.714	0.094	0	Proliferating basal cells	NUF2
0	1.11576	0.628	0.05	0	Proliferating basal cells	HMMR
0	1.1068	0.651	0.039	0	Proliferating basal cells	CDCA3
0	1.10658	0.699	0.085	0	Proliferating basal cells	KIF22
0	1.07692	0.644	0.052	0	Proliferating basal cells	KIF11
0	1.05582	0.64	0.051	0	Proliferating basal cells	ENSOARG00020009510
0	1.00697	0.999	0.904	0	Proliferating basal cells	ENSOARG00020009396
0	1.00085	0.932	0.516	0	Proliferating basal cells	CLIC1
0	0.99057	0.76	0.175	0	Proliferating basal cells	HMGB3
0	0.988604	0.973	0.543	0	Proliferating basal cells	PLP2
0	0.98287	0.643	0.055	0	Proliferating basal cells	BUB1
0	0.963881	0.689	0.108	0	Proliferating basal cells	NCAPG
0	0.958779	0.864	0.425	0	Proliferating basal cells	IDH1
0	0.949582	0.602	0.076	0	Proliferating basal cells	ENSOARG00020023913
0	0.942619	0.393	0.049	0	Proliferating basal cells	ENSOARG00020009029
0	0.923653	0.783	0.28	0	Proliferating basal cells	SOX2
0	0.922158	0.608	0.085	0	Proliferating basal cells	ANLN
0	0.915763	0.998	0.853	0	Proliferating basal cells	MIF
0	0.903028	0.759	0.249	0	Proliferating basal cells	PHGDH
0	0.889627	0.991	0.789	0	Proliferating basal cells	PRDX1
0	0.885843	0.564	0.054	0	Proliferating basal cells	ENSOARG00020018892
0	0.882118	0.658	0.123	0	Proliferating basal cells	HMGN5
0	0.878679	0.999	0.905	0	Proliferating basal cells	ENSOARG00020013487
0	0.878624	0.809	0.317	0	Proliferating basal cells	RAD21
0	0.868496	0.784	0.284	0	Proliferating basal cells	JPT1
0	0.865205	0.955	0.587	0	Proliferating basal cells	ENSOARG00020013424
0	0.855443	0.593	0.07	0	Proliferating basal cells	ENSOARG00020012669
0	0.854265	0.542	0.04	0	Proliferating basal cells	DLGAP5
0	0.837895	0.851	0.356	0	Proliferating basal cells	UBL4A
0	0.832581	0.513	0.042	0	Proliferating basal cells	CDK1
0	0.828374	0.842	0.362	0	Proliferating basal cells	KRT5
0	0.825474	0.536	0.046	0	Proliferating basal cells	SGO1
0	0.814514	0.647	0.086	0	Proliferating basal cells	CENPW
0	0.797312	0.564	0.077	0	Proliferating basal cells	NCAPD2
0	0.780857	0.818	0.314	0	Proliferating basal cells	CMC2
0	0.779925	0.42	0.021	0	Proliferating basal cells	PIMREG
0	0.778363	0.289	0.037	0	Proliferating basal cells	ENSOARG00020007176
0	0.776848	0.492	0.03	0	Proliferating basal cells	CDCA2
0	0.773714	0.564	0.083	0	Proliferating basal cells	ENSOARG00020009247
0	0.753079	0.704	0.186	0	Proliferating basal cells	CENPS
0	0.752119	0.53	0.045	0	Proliferating basal cells	KIF15
0	0.737922	0.504	0.039	0	Proliferating basal cells	ENSOARG00020010307
0	0.729055	0.597	0.192	0	Proliferating basal cells	KRT7
0	0.724347	0.496	0.036	0	Proliferating basal cells	KIF4A
0	0.721601	0.455	0.043	0	Proliferating basal cells	ENSOARG00020005761
0	0.71856	0.99	0.767	0	Proliferating basal cells	RAN
0	0.718452	0.769	0.282	0	Proliferating basal cells	RNASEH2C
0	0.71426	0.504	0.106	0	Proliferating basal cells	CLDN7
0	0.714102	0.697	0.237	0	Proliferating basal cells	BUB3
0	0.697473	0.756	0.27	0	Proliferating basal cells	BUD23
0	0.697408	0.588	0.14	0	Proliferating basal cells	ENSOARG00020009684
0	0.693295	0.332	0.042	0	Proliferating basal cells	H1-5
0	0.687155	0.535	0.107	0	Proliferating basal cells	UHRF1
0	0.675173	0.473	0.034	0	Proliferating basal cells	CCNA2
0	0.674544	0.527	0.145	0	Proliferating basal cells	KRT18
0	0.673218	0.462	0.031	0	Proliferating basal cells	KIFC1
0	0.672054	0.473	0.088	0	Proliferating basal cells	ENSOARG00020005281
0	0.666605	0.39	0.066	0	Proliferating basal cells	ENSOARG00020009328
0	0.664165	0.496	0.044	0	Proliferating basal cells	NDC80
0	0.655059	0.999	0.976	0	Proliferating basal cells	PTMA
0	0.650587	0.67	0.254	0	Proliferating basal cells	DTYMK
0	0.638681	0.937	0.432	0	Proliferating basal cells	ANXA1
0	0.635249	0.663	0.235	0	Proliferating basal cells	COL17A1
0	0.634238	0.352	0.071	0	Proliferating basal cells	ENSOARG00020007270
0	0.632766	0.692	0.27	0	Proliferating basal cells	MACROD1
0	0.632744	0.553	0.123	0	Proliferating basal cells	CKAP5
0	0.631277	0.617	0.158	0	Proliferating basal cells	CCDC34
0	0.630791	0.393	0.039	0	Proliferating basal cells	FBXO5
0	0.627143	0.418	0.034	0	Proliferating basal cells	AURKA
0	0.624042	0.273	0.035	0	Proliferating basal cells	ENSOARG00020009069
0	0.610471	0.741	0.271	0	Proliferating basal cells	TMPO
0	0.604589	0.502	0.072	0	Proliferating basal cells	CENPK
0	0.597412	0.395	0.027	0	Proliferating basal cells	KIF2C
0	0.595953	0.554	0.164	0	Proliferating basal cells	ENSOARG00020013946
0	0.595756	0.4	0.032	0	Proliferating basal cells	ECT2
0	0.588918	0.487	0.083	0	Proliferating basal cells	TTF2
0	0.585415	0.418	0.078	0	Proliferating basal cells	CLSPN
0	0.571221	0.607	0.221	0	Proliferating basal cells	COQ7
0	0.568475	0.527	0.156	0	Proliferating basal cells	EPCAM
0	0.560973	0.406	0.03	0	Proliferating basal cells	ENSOARG00020023525
0	0.546053	0.367	0.03	0	Proliferating basal cells	PARPBP
0	0.53951	0.846	0.357	0	Proliferating basal cells	ENSOARG00020017637
0	0.535023	1	0.991	0	Proliferating basal cells	RPLP0
0	0.530233	0.397	0.031	0	Proliferating basal cells	TTK
0	0.526087	1	0.997	0	Proliferating basal cells	RPS8
0	0.52532	0.347	0.024	0	Proliferating basal cells	KIF18A
0	0.522586	0.384	0.089	0	Proliferating basal cells	H1-3
0	0.519844	0.396	0.037	0	Proliferating basal cells	CKAP2L
0	0.514843	0.542	0.135	0	Proliferating basal cells	LBR
0	0.503141	0.43	0.079	0	Proliferating basal cells	CCDC18
0	0.501363	0.455	0.085	0	Proliferating basal cells	CEP44
0	0.499782	0.577	0.166	0	Proliferating basal cells	NRM
0	0.494693	0.422	0.056	0	Proliferating basal cells	SPC25
0	0.493974	0.506	0.132	0	Proliferating basal cells	RNASEH2A
0	0.477406	0.501	0.116	0	Proliferating basal cells	LMNB1
0	0.461053	0.298	0.02	0	Proliferating basal cells	DEPDC1
0	0.452728	0.383	0.05	0	Proliferating basal cells	CDKN2C
0	0.436758	0.452	0.126	0	Proliferating basal cells	NUP37
0	0.433961	0.348	0.042	0	Proliferating basal cells	UBE2T
0	0.4268	0.283	0.029	0	Proliferating basal cells	BORA
0	0.419679	0.521	0.165	0	Proliferating basal cells	ENSOARG00020017603
0	0.409183	0.335	0.04	0	Proliferating basal cells	RACGAP1
0	0.407663	0.249	0.014	0	Proliferating basal cells	CENPA
0	0.402106	0.255	0.013	0	Proliferating basal cells	CDKN3
0	0.400747	0.295	0.034	0	Proliferating basal cells	ENSOARG00020009051
0	0.393738	0.37	0.061	0	Proliferating basal cells	CENPP
0	0.386758	0.264	0.016	0	Proliferating basal cells	HJURP
0	0.38532	0.32	0.031	0	Proliferating basal cells	OIP5
0	0.37217	0.355	0.08	0	Proliferating basal cells	ENSOARG00020011939
0	0.370372	0.284	0.021	0	Proliferating basal cells	DEPDC1B
0	0.363786	0.377	0.093	0	Proliferating basal cells	TRIP13
0	0.359308	0.326	0.058	0	Proliferating basal cells	G2E3
0	0.358713	0.325	0.07	0	Proliferating basal cells	KPNA2
0	0.352687	0.272	0.026	0	Proliferating basal cells	ESPL1
0	0.349399	0.173	0.025	0	Proliferating basal cells	AGR2
0	0.347972	0.324	0.068	0	Proliferating basal cells	DBF4
0	0.342894	0.404	0.096	0	Proliferating basal cells	VRK1
0	0.340926	0.267	0.018	0	Proliferating basal cells	NEIL3
0	0.340432	0.377	0.085	0	Proliferating basal cells	MPHOSPH9
0	0.332046	0.354	0.063	0	Proliferating basal cells	CIP2A
0	0.329691	0.248	0.023	0	Proliferating basal cells	ESCO2
0	0.319722	0.169	0.015	0	Proliferating basal cells	H1-1
0	0.315463	0.852	0.305	0	Proliferating basal cells	ENSOARG00020005568
0	0.314037	0.334	0.078	0	Proliferating basal cells	TYMS
0	0.313849	0.245	0.024	0	Proliferating basal cells	INCENP
0	0.292336	0.314	0.067	0	Proliferating basal cells	CEP70
0	0.286106	0.335	0.076	0	Proliferating basal cells	PRIM2
0	0.28023	0.205	0.011	0	Proliferating basal cells	TROAP
0	0.265658	0.225	0.02	0	Proliferating basal cells	CEP55
1.93098e-305	0.31856	0.308	0.071	3.59317e-301	Proliferating basal cells	KRTCAP3
6.13994e-300	0.261696	0.224	0.04	1.14252e-295	Proliferating basal cells	BRCA1
7.49336e-300	0.384	0.533	0.171	1.39436e-295	Proliferating basal cells	CADM1
1.37945e-298	0.723457	0.877	0.468	2.56688e-294	Proliferating basal cells	CNIH4
8.51437e-292	0.296524	0.31	0.071	1.58435e-287	Proliferating basal cells	ENSOARG00020023630
1.40839e-286	0.517599	0.999	0.97	2.62073e-282	Proliferating basal cells	ENSOARG00020025291
1.6428e-286	0.31992	0.296	0.067	3.05693e-282	Proliferating basal cells	IGSF9
1.93524e-286	0.631963	0.793	0.358	3.6011e-282	Proliferating basal cells	HP1BP3
6.29387e-286	0.313701	0.378	0.099	1.17116e-281	Proliferating basal cells	EZH2
4.93954e-280	0.674946	0.816	0.365	9.19149e-276	Proliferating basal cells	CLCA2
1.34897e-277	0.465291	1	0.991	2.51016e-273	Proliferating basal cells	RPS5
1.65701e-277	0.706469	0.95	0.528	3.08336e-273	Proliferating basal cells	IGFBP6
1.77326e-276	0.425768	0.5	0.166	3.29969e-272	Proliferating basal cells	PKP4
5.34795e-276	0.656452	0.727	0.325	9.95147e-272	Proliferating basal cells	LSM4
9.88743e-276	0.285967	0.349	0.09	1.83985e-271	Proliferating basal cells	ENSOARG00020005533
4.10813e-274	0.411412	0.328	0.084	7.64441e-270	Proliferating basal cells	TNNI1
3.42605e-269	0.261677	0.382	0.101	6.37519e-265	Proliferating basal cells	MCUB
4.09271e-268	0.419702	0.588	0.211	7.61571e-264	Proliferating basal cells	HDGFL2
3.82889e-265	0.688595	0.775	0.332	7.12479e-261	Proliferating basal cells	DSP
5.10249e-265	0.523811	0.634	0.25	9.49472e-261	Proliferating basal cells	KLF5
1.41822e-264	0.395118	0.531	0.182	2.63902e-260	Proliferating basal cells	BRD8
1.263e-261	0.461925	0.561	0.203	2.35019e-257	Proliferating basal cells	CNTRL
3.90598e-261	0.495063	0.471	0.156	7.26825e-257	Proliferating basal cells	DSG2
4.18484e-260	0.646543	0.934	0.515	7.78716e-256	Proliferating basal cells	PDLIM1
5.71072e-254	0.731658	0.964	0.668	1.06265e-249	Proliferating basal cells	MDH1
1.07107e-250	0.49959	1	0.926	1.99305e-246	Proliferating basal cells	EEF1G
2.17988e-249	0.3528	0.224	0.046	4.05632e-245	Proliferating basal cells	KRT8
1.16469e-248	0.358876	0.499	0.172	2.16725e-244	Proliferating basal cells	CYB5B
1.38783e-247	0.598101	0.893	0.464	2.58247e-243	Proliferating basal cells	ENSOARG00020005804
2.27717e-246	0.794665	0.981	0.737	4.23735e-242	Proliferating basal cells	ENSOARG00020004551
1.5827e-245	1.00124	0.872	0.567	2.94508e-241	Proliferating basal cells	TUBB4B
1.21689e-244	0.353209	0.414	0.132	2.26438e-240	Proliferating basal cells	BAIAP2L1
2.9614e-244	0.50316	0.664	0.279	5.51057e-240	Proliferating basal cells	TUBA4A
3.22671e-244	0.607801	0.95	0.61	6.00426e-240	Proliferating basal cells	PRDX4
5.43265e-244	0.573223	0.806	0.4	1.01091e-239	Proliferating basal cells	ENSOARG00020006176
1.00743e-243	0.437934	0.461	0.152	1.87463e-239	Proliferating basal cells	ATAD2
2.88222e-243	0.443072	0.545	0.2	5.36324e-239	Proliferating basal cells	DAPL1
9.93548e-243	0.601586	0.948	0.609	1.84879e-238	Proliferating basal cells	LMNA
1.18623e-240	0.392291	1	0.989	2.20734e-236	Proliferating basal cells	ENSOARG00020002748
1.35554e-240	0.253135	0.206	0.041	2.5224e-236	Proliferating basal cells	H2BC18
2.42408e-238	0.474971	0.637	0.264	4.51072e-234	Proliferating basal cells	RFC4
2.15601e-237	0.341765	0.544	0.2	4.0119e-233	Proliferating basal cells	EXOSC8
3.08887e-234	0.376217	0.597	0.237	5.74777e-230	Proliferating basal cells	CDK2AP2
1.65248e-230	0.510241	0.659	0.288	3.07493e-226	Proliferating basal cells	USP1
4.30984e-229	0.614768	0.931	0.585	8.01975e-225	Proliferating basal cells	MRPS26
1.63641e-228	0.520715	0.367	0.111	3.04504e-224	Proliferating basal cells	TFF3
2.89596e-228	0.274987	0.212	0.044	5.3888e-224	Proliferating basal cells	CA3
1.63136e-227	0.324268	0.451	0.152	3.03564e-223	Proliferating basal cells	SEPTIN10
2.79468e-225	0.472072	0.833	0.428	5.20034e-221	Proliferating basal cells	LSM5
8.19007e-225	0.442287	0.622	0.26	1.52401e-220	Proliferating basal cells	MYL6B
1.29671e-223	0.412708	0.701	0.309	2.41291e-219	Proliferating basal cells	LSM2
2.78012e-223	0.406534	0.505	0.187	5.17325e-219	Proliferating basal cells	RFC3
1.63017e-222	0.365465	1	0.997	3.03343e-218	Proliferating basal cells	RPLP1
4.42883e-221	0.355058	0.434	0.149	8.24116e-217	Proliferating basal cells	IRX3
2.22691e-219	0.440594	0.587	0.242	4.14384e-215	Proliferating basal cells	GRTP1
1.1388e-216	0.383352	0.51	0.195	2.11908e-212	Proliferating basal cells	CXADR
2.45257e-215	0.310698	0.467	0.165	4.56375e-211	Proliferating basal cells	DDX39A
1.16304e-214	0.2583	0.386	0.123	2.16418e-210	Proliferating basal cells	CSE1L
2.60724e-214	0.290141	0.412	0.133	4.85155e-210	Proliferating basal cells	FAM126A
2.98086e-214	0.400151	0.562	0.228	5.54679e-210	Proliferating basal cells	METTL26
4.20913e-213	0.285918	0.422	0.143	7.83234e-209	Proliferating basal cells	ACTL6A
1.55863e-212	0.295278	0.415	0.138	2.9003e-208	Proliferating basal cells	ZMYM1
3.65285e-211	0.610629	0.974	0.752	6.79722e-207	Proliferating basal cells	DEK
1.0106e-210	0.404096	0.607	0.259	1.88052e-206	Proliferating basal cells	ENSOARG00020008734
1.31868e-210	0.274713	0.352	0.106	2.45381e-206	Proliferating basal cells	ENSOARG00020007614
2.9514e-210	0.306473	0.604	0.238	5.49196e-206	Proliferating basal cells	CETN3
3.9019e-210	0.733113	0.974	0.746	7.26066e-206	Proliferating basal cells	CALM2
4.39583e-209	0.556323	0.98	0.755	8.17977e-205	Proliferating basal cells	ENSOARG00020019951
1.17471e-208	0.581529	0.923	0.512	2.18591e-204	Proliferating basal cells	PTGR1
5.45165e-206	0.371394	1	0.995	1.01444e-201	Proliferating basal cells	ENSOARG00020022219
2.99262e-205	0.355955	0.531	0.211	5.56867e-201	Proliferating basal cells	ALG14
6.66662e-205	0.379206	1	0.978	1.24052e-200	Proliferating basal cells	ENSOARG00020012848
3.79241e-203	0.305941	0.375	0.117	7.05691e-199	Proliferating basal cells	H1F0
2.71589e-201	0.283125	0.322	0.098	5.05372e-197	Proliferating basal cells	GPR87
2.23644e-200	0.478821	0.753	0.371	4.16157e-196	Proliferating basal cells	ENSOARG00020002318
2.4502e-199	0.510423	0.776	0.392	4.55933e-195	Proliferating basal cells	ARPC5L
3.38918e-197	0.287594	0.34	0.108	6.30659e-193	Proliferating basal cells	GCLM
3.55118e-197	0.370223	1	0.989	6.60803e-193	Proliferating basal cells	RPS9
8.96268e-197	0.350246	1	0.99	1.66778e-192	Proliferating basal cells	RPL8
1.0767e-196	0.319728	0.552	0.224	2.00353e-192	Proliferating basal cells	MALSU1
2.58146e-195	0.433991	0.631	0.285	4.80358e-191	Proliferating basal cells	NAXE
4.21308e-195	0.443836	0.777	0.395	7.8397e-191	Proliferating basal cells	PHF5A
8.15091e-195	0.427097	0.843	0.446	1.51672e-190	Proliferating basal cells	ENSOARG00020021294
1.16749e-194	0.2567	0.295	0.086	2.17246e-190	Proliferating basal cells	UBALD2
1.70607e-194	0.415099	0.474	0.185	3.17466e-190	Proliferating basal cells	HS3ST6
5.79823e-193	0.414012	0.693	0.326	1.07893e-188	Proliferating basal cells	ENSOARG00020000903
1.29138e-187	0.425719	0.378	0.127	2.403e-183	Proliferating basal cells	H1-2
4.50178e-187	0.279586	0.362	0.12	8.37692e-183	Proliferating basal cells	CHEK1
6.11006e-187	0.331333	0.384	0.134	1.13696e-182	Proliferating basal cells	DKKL1
4.54276e-186	0.285802	0.612	0.261	8.45317e-182	Proliferating basal cells	NUP50
1.71727e-185	0.310555	0.6	0.258	3.1955e-181	Proliferating basal cells	NSMCE4A
2.90124e-185	0.32235	0.522	0.214	5.39863e-181	Proliferating basal cells	GMDS
4.23366e-185	0.469236	0.992	0.872	7.87799e-181	Proliferating basal cells	SSR4
4.37175e-185	0.449667	0.831	0.449	8.13495e-181	Proliferating basal cells	ENSOARG00020025950
4.66407e-184	0.481649	0.8	0.391	8.6789e-180	Proliferating basal cells	AK2
3.85401e-183	0.282752	0.387	0.137	7.17154e-179	Proliferating basal cells	ENSOARG00020017275
4.26486e-183	0.386751	1	0.983	7.93606e-179	Proliferating basal cells	RACK1
1.22034e-182	0.347958	0.562	0.238	2.2708e-178	Proliferating basal cells	FERMT1
9.18848e-182	0.347624	0.622	0.278	1.70979e-177	Proliferating basal cells	CCDC167
1.0473e-181	0.311834	0.999	0.988	1.94882e-177	Proliferating basal cells	RPL14
1.52521e-181	0.409771	0.739	0.367	2.8381e-177	Proliferating basal cells	NAA38
1.63489e-180	0.581683	0.931	0.646	3.04221e-176	Proliferating basal cells	ENSOARG00020019793
3.14892e-179	0.317485	0.397	0.144	5.85952e-175	Proliferating basal cells	SPA17
3.25143e-179	0.338949	0.45	0.177	6.05025e-175	Proliferating basal cells	ENSOARG00020025395
4.88694e-179	0.36405	0.607	0.273	9.09363e-175	Proliferating basal cells	SUZ12
1.45302e-178	0.251884	0.238	0.065	2.70378e-174	Proliferating basal cells	ENSOARG00020019583
1.73801e-178	0.501753	0.958	0.651	3.2341e-174	Proliferating basal cells	HMGN3
4.57863e-178	1.01074	0.621	0.299	8.51991e-174	Proliferating basal cells	KRT19
4.7102e-178	0.350617	1	0.984	8.76474e-174	Proliferating basal cells	RPSA
2.55478e-177	0.492563	0.946	0.627	4.75393e-173	Proliferating basal cells	SNRPD1
2.01362e-176	0.410766	0.996	0.885	3.74694e-172	Proliferating basal cells	ENSOARG00020005570
4.50692e-176	0.32563	0.622	0.28	8.38648e-172	Proliferating basal cells	ABRACL
1.27686e-173	0.284318	0.532	0.22	2.37598e-169	Proliferating basal cells	CHRAC1
2.76811e-173	0.362008	1	0.98	5.15089e-169	Proliferating basal cells	RPL3
1.92281e-172	0.281259	0.285	0.088	3.57796e-168	Proliferating basal cells	NT5C
1.68554e-171	0.308704	0.448	0.177	3.13645e-167	Proliferating basal cells	AP1M2
2.6378e-171	0.508082	0.997	0.813	4.90842e-167	Proliferating basal cells	S100A10
2.84014e-171	0.493021	0.87	0.464	5.28493e-167	Proliferating basal cells	AHCY
4.33153e-171	0.421158	0.999	0.625	8.0601e-167	Proliferating basal cells	S100A2
4.68093e-171	0.324114	1	0.991	8.71027e-167	Proliferating basal cells	RPL7A
8.57444e-171	0.337123	0.601	0.274	1.59553e-166	Proliferating basal cells	SSNA1
1.5911e-169	0.338406	0.345	0.118	2.96072e-165	Proliferating basal cells	DLK2
3.40342e-169	0.420081	0.556	0.248	6.33309e-165	Proliferating basal cells	MCM7
1.25227e-168	0.328623	0.548	0.236	2.33022e-164	Proliferating basal cells	ENSOARG00020024115
4.24935e-168	0.442103	0.903	0.506	7.90718e-164	Proliferating basal cells	CD9
1.30739e-167	0.292848	0.503	0.207	2.43279e-163	Proliferating basal cells	H2AFJ
1.45007e-167	0.443	0.873	0.511	2.69829e-163	Proliferating basal cells	RBM8A
4.41978e-167	0.265504	0.352	0.125	8.22432e-163	Proliferating basal cells	LSR
1.83897e-166	0.385053	0.763	0.376	3.42195e-162	Proliferating basal cells	ENSOARG00020010443
2.42619e-165	0.425517	0.876	0.505	4.51465e-161	Proliferating basal cells	SNRPC
8.21233e-165	0.476349	0.95	0.594	1.52815e-160	Proliferating basal cells	FAM162A
2.50673e-164	0.352144	0.587	0.263	4.66453e-160	Proliferating basal cells	BPNT1
6.41423e-164	0.263197	0.773	0.373	1.19356e-159	Proliferating basal cells	SFN
4.64473e-161	0.441445	0.99	0.777	8.64292e-157	Proliferating basal cells	SELENOW
1.87221e-159	0.349518	0.681	0.333	3.48381e-155	Proliferating basal cells	NDUFV3
2.17756e-159	0.546398	1	0.969	4.05201e-155	Proliferating basal cells	ACTG1
3.68577e-159	0.485071	0.973	0.677	6.85847e-155	Proliferating basal cells	ENSOARG00020007966
1.30457e-157	0.577138	0.993	0.859	2.42754e-153	Proliferating basal cells	TXN
1.75769e-157	0.50194	0.986	0.481	3.2707e-153	Proliferating basal cells	ENSOARG00020015582
1.82752e-156	0.261818	0.503	0.213	3.40064e-152	Proliferating basal cells	ENSOARG00020023406
6.46567e-156	0.463552	0.87	0.517	1.20313e-151	Proliferating basal cells	UQCC2
2.65397e-155	0.433087	0.885	0.553	4.93851e-151	Proliferating basal cells	SMC3
6.97483e-155	0.25325	0.363	0.134	1.29788e-150	Proliferating basal cells	TFAP2A
2.43578e-154	0.310025	1	0.989	4.5325e-150	Proliferating basal cells	ENSOARG00020021320
1.37366e-152	0.275262	0.567	0.255	2.55611e-148	Proliferating basal cells	ORMDL2
3.24661e-152	0.334773	0.641	0.302	6.04129e-148	Proliferating basal cells	MRPS25
3.50115e-152	0.252421	0.49	0.209	6.51493e-148	Proliferating basal cells	CHKB
4.6785e-152	0.465386	0.999	0.955	8.70575e-148	Proliferating basal cells	RPS6
2.0497e-151	0.332766	0.412	0.167	3.81409e-147	Proliferating basal cells	LIG1
7.56901e-151	0.489832	0.96	0.671	1.40844e-146	Proliferating basal cells	ENSOARG00020007903
8.68585e-151	0.263437	0.599	0.275	1.61626e-146	Proliferating basal cells	PPIH
3.25705e-149	0.356379	1	0.967	6.06072e-145	Proliferating basal cells	ENSOARG00020009956
5.11366e-149	0.259502	0.475	0.199	9.51549e-145	Proliferating basal cells	TSEN34
1.74174e-148	0.349953	0.646	0.311	3.24103e-144	Proliferating basal cells	ENSOARG00020025903
1.00411e-147	0.403716	0.826	0.477	1.86845e-143	Proliferating basal cells	CSRP2
2.4645e-147	0.640068	0.536	0.249	4.58594e-143	Proliferating basal cells	HIST2H2AC
9.64378e-147	0.350157	1	0.987	1.79452e-142	Proliferating basal cells	RPS20
1.15507e-146	0.362454	0.74	0.39	2.14936e-142	Proliferating basal cells	ACP1
4.14165e-145	0.281975	0.478	0.206	7.70679e-141	Proliferating basal cells	AACS
7.88309e-144	0.273652	0.347	0.13	1.46688e-139	Proliferating basal cells	ENSOARG00020012305
1.60984e-143	0.358722	0.622	0.304	2.99559e-139	Proliferating basal cells	ANXA2
4.91216e-143	0.469647	0.961	0.679	9.14055e-139	Proliferating basal cells	DBI
7.73229e-143	0.259553	0.535	0.243	1.43883e-138	Proliferating basal cells	YBX1
4.19035e-142	0.305031	0.328	0.116	7.79741e-138	Proliferating basal cells	H1-4
4.31553e-142	0.311889	0.714	0.367	8.03033e-138	Proliferating basal cells	PSMC4
1.3284e-140	0.460344	0.918	0.575	2.4719e-136	Proliferating basal cells	S100A11
3.42228e-140	0.532885	0.912	0.594	6.36817e-136	Proliferating basal cells	ENSOARG00020006995
9.95128e-140	0.37273	0.675	0.327	1.85173e-135	Proliferating basal cells	MGST1
3.97625e-139	0.279952	0.551	0.257	7.39901e-135	Proliferating basal cells	COA5
1.26504e-138	0.302389	0.692	0.348	2.35398e-134	Proliferating basal cells	ENSOARG00020009357
2.60779e-138	0.385129	0.822	0.477	4.85258e-134	Proliferating basal cells	IMPDH2
2.7008e-137	0.369898	0.913	0.571	5.02565e-133	Proliferating basal cells	EIF1AX
1.20429e-136	0.266388	0.634	0.308	2.24095e-132	Proliferating basal cells	LRRCC1
8.17632e-136	0.423854	0.922	0.577	1.52145e-131	Proliferating basal cells	ENSOARG00020014986
1.04134e-135	0.261371	0.374	0.148	1.93772e-131	Proliferating basal cells	HDGF
2.76e-134	0.35858	0.785	0.433	5.13581e-130	Proliferating basal cells	ENSOARG00020022706
8.91228e-134	0.34792	0.82	0.469	1.6584e-129	Proliferating basal cells	STMP1
2.72227e-133	0.414461	0.956	0.641	5.0656e-129	Proliferating basal cells	SNRPG
3.75984e-133	0.333959	0.505	0.234	6.99631e-129	Proliferating basal cells	MGST2
6.92102e-133	0.287052	0.624	0.309	1.28786e-128	Proliferating basal cells	MRPS12
2.09466e-132	0.280902	0.731	0.382	3.89775e-128	Proliferating basal cells	S100A16
1.54075e-131	0.25019	0.406	0.17	2.86703e-127	Proliferating basal cells	RAB25
6.0372e-131	0.287552	0.999	0.987	1.1234e-126	Proliferating basal cells	ENSOARG00020018336
1.44833e-130	0.285613	0.698	0.365	2.69505e-126	Proliferating basal cells	H2AFY
1.49739e-130	0.402895	0.892	0.564	2.78634e-126	Proliferating basal cells	KIF5B
2.4063e-130	0.513003	0.298	0.111	4.47764e-126	Proliferating basal cells	ENSOARG00020012622
1.01153e-129	0.282376	1	0.989	1.88225e-125	Proliferating basal cells	RPL18
3.01083e-129	0.462212	0.927	0.587	5.60256e-125	Proliferating basal cells	SYNE2
3.90144e-129	0.339552	0.726	0.398	7.2598e-125	Proliferating basal cells	SMC1A
6.66066e-129	0.311264	0.653	0.336	1.23942e-124	Proliferating basal cells	MRPL22
8.81622e-129	0.319672	0.72	0.388	1.64052e-124	Proliferating basal cells	DNAJC19
1.31649e-128	0.320622	0.451	0.205	2.44973e-124	Proliferating basal cells	ETFDH
3.4017e-128	0.288091	0.673	0.345	6.32988e-124	Proliferating basal cells	FKBP4
8.85463e-127	0.541125	0.82	0.535	1.64767e-122	Proliferating basal cells	SIVA1
1.37147e-126	0.419636	0.938	0.656	2.55203e-122	Proliferating basal cells	PCBP2
1.56943e-126	0.392574	0.76	0.423	2.9204e-122	Proliferating basal cells	UACA
5.78861e-126	0.250382	0.528	0.248	1.07714e-121	Proliferating basal cells	HRAS
1.81951e-125	0.393196	0.995	0.909	3.38575e-121	Proliferating basal cells	ENSOARG00020014163
2.41907e-125	0.282693	0.83	0.475	4.5014e-121	Proliferating basal cells	MAGOH
3.1632e-125	0.526063	0.745	0.397	5.88608e-121	Proliferating basal cells	C15orf48
3.39723e-125	0.260189	0.646	0.329	6.32157e-121	Proliferating basal cells	ENSOARG00020011360
9.06335e-125	0.335587	0.8	0.462	1.68651e-120	Proliferating basal cells	SNRPB
1.57291e-124	0.295459	0.513	0.246	2.92687e-120	Proliferating basal cells	ZBTB7C
3.07442e-124	0.272569	0.477	0.215	5.72088e-120	Proliferating basal cells	PDZK1IP1
4.98384e-124	0.258032	0.332	0.131	9.27393e-120	Proliferating basal cells	PERP
6.00225e-124	0.358831	0.999	0.96	1.1169e-119	Proliferating basal cells	ENSOARG00020021369
1.21414e-121	0.294848	0.714	0.391	2.25928e-117	Proliferating basal cells	CCAR1
1.89073e-121	0.440514	0.978	0.741	3.51827e-117	Proliferating basal cells	ENSOARG00020022770
1.97351e-121	0.258162	0.584	0.293	3.6723e-117	Proliferating basal cells	CARS2
5.88054e-121	0.410236	0.996	0.895	1.09425e-116	Proliferating basal cells	RPS2
2.08199e-120	0.253161	0.373	0.154	3.87416e-116	Proliferating basal cells	FGFR2
5.75733e-120	0.284233	0.641	0.334	1.07132e-115	Proliferating basal cells	MRPL39
6.87068e-120	0.267508	0.567	0.281	1.2785e-115	Proliferating basal cells	HPF1
1.01107e-119	0.417782	0.978	0.776	1.8814e-115	Proliferating basal cells	ENSOARG00020002539
2.79994e-119	0.55153	0.991	0.822	5.21013e-115	Proliferating basal cells	MGST3
8.16204e-119	0.363474	0.827	0.459	1.51879e-114	Proliferating basal cells	ETHE1
1.27755e-118	0.268429	0.76	0.418	2.37726e-114	Proliferating basal cells	CCT5
2.68784e-118	0.257081	0.438	0.197	5.00153e-114	Proliferating basal cells	DSC2
3.55854e-117	0.252314	0.652	0.341	6.62173e-113	Proliferating basal cells	MRPL30
3.61504e-117	0.349383	0.983	0.801	6.72686e-113	Proliferating basal cells	ERH
1.59371e-116	0.282119	0.555	0.277	2.96557e-112	Proliferating basal cells	PLGRKT
1.69215e-116	0.346286	0.671	0.366	3.14875e-112	Proliferating basal cells	ENSOARG00020014591
3.05248e-116	0.439932	0.909	0.624	5.68005e-112	Proliferating basal cells	ENSOARG00020001641
4.73131e-116	0.356429	0.828	0.484	8.80402e-112	Proliferating basal cells	ETFA
1.07997e-115	0.317029	0.633	0.336	2.0096e-111	Proliferating basal cells	COX11
1.29393e-115	0.319668	0.469	0.222	2.40774e-111	Proliferating basal cells	ENSOARG00020019066
2.92348e-115	0.254605	0.672	0.357	5.44001e-111	Proliferating basal cells	GTF2A2
6.16305e-115	0.254761	0.332	0.137	1.14682e-110	Proliferating basal cells	ENSOARG00020016651
2.88885e-114	0.326746	0.897	0.574	5.37558e-110	Proliferating basal cells	ENY2
1.84186e-113	0.255318	0.408	0.183	3.42734e-109	Proliferating basal cells	PPARG
2.16349e-113	0.471435	0.943	0.698	4.02582e-109	Proliferating basal cells	HNRNPA2B1
2.39401e-113	0.262791	0.672	0.363	4.45478e-109	Proliferating basal cells	LRRFIP1
2.5722e-113	0.428455	0.919	0.643	4.78635e-109	Proliferating basal cells	RANBP1
1.42454e-112	0.266765	0.805	0.471	2.65079e-108	Proliferating basal cells	ENSOARG00020014719
8.12607e-112	0.311871	0.836	0.521	1.5121e-107	Proliferating basal cells	ATP2B1
9.38839e-108	0.316554	0.815	0.487	1.74699e-103	Proliferating basal cells	HIKESHI
3.58018e-107	0.251692	1	0.988	6.662e-103	Proliferating basal cells	RPL11
4.58391e-107	0.343689	0.833	0.487	8.52974e-103	Proliferating basal cells	SNRNP25
9.71451e-107	0.310713	0.999	0.954	1.80768e-102	Proliferating basal cells	ENSOARG00020004797
1.87447e-106	0.291719	0.598	0.309	3.48801e-102	Proliferating basal cells	ETS2
2.96637e-106	0.383481	0.946	0.687	5.51981e-102	Proliferating basal cells	ENSOARG00020025507
4.40039e-106	0.459449	0.973	0.729	8.18824e-102	Proliferating basal cells	TSPO
1.31619e-105	0.261274	0.818	0.492	2.44916e-101	Proliferating basal cells	TRIM28
1.95062e-105	0.326231	0.768	0.433	3.62972e-101	Proliferating basal cells	UQCRC1
2.85896e-105	0.40113	0.969	0.707	5.31995e-101	Proliferating basal cells	COX5A
1.52709e-104	0.469551	0.258	0.098	2.84161e-100	Proliferating basal cells	AREG
1.44492e-103	0.451006	0.972	0.796	2.68872e-99	Proliferating basal cells	ENSOARG00020022194
3.56577e-102	0.310673	0.806	0.478	6.63518e-98	Proliferating basal cells	ENSOARG00020006229
9.40435e-102	0.278856	0.659	0.359	1.74996e-97	Proliferating basal cells	NDUFA10
5.67346e-101	0.258626	0.531	0.274	1.05572e-96	Proliferating basal cells	ENSOARG00020014618
9.70466e-101	0.260984	1	0.987	1.80584e-96	Proliferating basal cells	RPS10
4.01615e-100	0.315449	0.895	0.555	7.47326e-96	Proliferating basal cells	NDUFB2
1.34905e-99	0.264672	0.82	0.491	2.5103e-95	Proliferating basal cells	POLR2G
1.0129e-96	0.302113	0.943	0.671	1.8848e-92	Proliferating basal cells	HNRNPM
2.92345e-96	0.261895	0.808	0.493	5.43996e-92	Proliferating basal cells	DCTN3
1.08195e-95	0.34433	0.931	0.642	2.0133e-91	Proliferating basal cells	PSMB1
2.85863e-95	0.252376	0.812	0.466	5.31934e-91	Proliferating basal cells	ENSOARG00020014432
5.59952e-94	0.250306	1	0.985	1.04196e-89	Proliferating basal cells	RPL29
1.53146e-93	0.257553	0.872	0.556	2.84973e-89	Proliferating basal cells	ENSOARG00020026150
2.06249e-93	0.362659	0.973	0.722	3.83788e-89	Proliferating basal cells	NDUFB10
7.52807e-93	0.391898	0.982	0.792	1.40082e-88	Proliferating basal cells	ENSOARG00020017129
1.0552e-92	0.303179	0.884	0.572	1.96352e-88	Proliferating basal cells	ENSOARG00020001479
6.02486e-92	0.259778	0.777	0.469	1.12111e-87	Proliferating basal cells	GLRX3
6.62983e-92	0.331934	0.478	0.243	1.23368e-87	Proliferating basal cells	MCRIP2
4.28564e-91	0.296067	0.771	0.443	7.97472e-87	Proliferating basal cells	ENSOARG00020020724
5.01596e-90	0.278949	0.762	0.427	9.3337e-86	Proliferating basal cells	SQOR
1.71776e-89	0.259205	0.836	0.52	3.19641e-85	Proliferating basal cells	ENSOARG00020010111
2.05704e-87	0.370775	0.9	0.605	3.82775e-83	Proliferating basal cells	ENSOARG00020013805
8.50547e-87	0.367036	0.577	0.315	1.5827e-82	Proliferating basal cells	UGT1A1
1.04608e-86	0.26883	0.922	0.642	1.94654e-82	Proliferating basal cells	HNRNPH3
1.28108e-86	0.271073	0.472	0.245	2.38383e-82	Proliferating basal cells	ENSOARG00020015070
1.47392e-86	0.318524	0.944	0.659	2.74267e-82	Proliferating basal cells	PRDX5
2.97789e-86	0.26186	0.734	0.435	5.54126e-82	Proliferating basal cells	DST
3.05463e-85	0.257747	0.84	0.529	5.68405e-81	Proliferating basal cells	PSMA4
5.25734e-85	0.425186	0.973	0.781	9.78286e-81	Proliferating basal cells	ATP5F1A
8.60622e-83	0.292958	0.947	0.683	1.60144e-78	Proliferating basal cells	ENSOARG00020004077
1.60928e-82	0.36157	0.968	0.762	2.99455e-78	Proliferating basal cells	ATP5PO
6.04529e-80	0.30518	0.879	0.581	1.12491e-75	Proliferating basal cells	NDUFA12
5.92198e-79	0.295336	0.953	0.737	1.10196e-74	Proliferating basal cells	ENSOARG00020000296
7.69543e-79	0.267792	0.776	0.462	1.43197e-74	Proliferating basal cells	UQCRC2
9.01754e-79	0.295585	0.916	0.667	1.67798e-74	Proliferating basal cells	TCP1
1.33279e-77	0.278573	0.987	0.833	2.48006e-73	Proliferating basal cells	EIF3K
3.59302e-77	0.255857	0.835	0.521	6.6859e-73	Proliferating basal cells	NDUFV2
4.29341e-77	0.255366	0.863	0.551	7.98918e-73	Proliferating basal cells	FBL
5.96102e-76	0.321934	0.929	0.631	1.10923e-71	Proliferating basal cells	NDUFS8
1.06378e-74	0.276033	0.81	0.5	1.97947e-70	Proliferating basal cells	CYC1
2.5734e-72	0.257534	0.85	0.54	4.78859e-68	Proliferating basal cells	MPC2
4.98708e-71	0.284208	0.998	0.9	9.27997e-67	Proliferating basal cells	RPL4
1.01218e-69	0.262311	0.938	0.691	1.88347e-65	Proliferating basal cells	ENSOARG00020024850
5.6606e-69	0.252041	0.92	0.652	1.05332e-64	Proliferating basal cells	C9orf16
6.42242e-67	0.262765	0.708	0.472	1.19508e-62	Proliferating basal cells	ENSOARG00020000265
2.81721e-63	0.264218	0.923	0.678	5.24226e-59	Proliferating basal cells	ATP6V0E1
1.79947e-62	0.379963	0.959	0.811	3.34845e-58	Proliferating basal cells	UBC
8.5742e-59	0.2786	0.264	0.13	1.59549e-54	Proliferating basal cells	FBP1
3.21777e-54	0.272998	0.562	0.37	5.98763e-50	Proliferating basal cells	DNMT1
3.34171e-50	0.267101	0.313	0.172	6.21826e-46	Proliferating basal cells	THEM5
2.18181e-44	0.259135	0.738	0.513	4.0599e-40	Proliferating basal cells	ENSOARG00020002084
6.21638e-182	3.30949	0.396	0.198	1.15674e-177	Basal cells_FABP4 high	FABP4
4.63988e-104	1.66233	0.548	0.41	8.63388e-100	Basal cells_FABP4 high	CA1
6.87729e-90	0.35142	0.984	0.995	1.27973e-85	Basal cells_FABP4 high	RPS18
2.18723e-81	0.354578	0.954	0.987	4.06999e-77	Basal cells_FABP4 high	ENSOARG00020023953
8.96781e-77	0.521915	0.9	0.968	1.66873e-72	Basal cells_FABP4 high	ENSOARG00020009956
9.42842e-72	0.275477	0.118	0.347	1.75444e-67	Basal cells_FABP4 high	ETAA1
2.4006e-70	0.378831	0.928	0.983	4.46704e-66	Basal cells_FABP4 high	ENSOARG00020013105
2.02232e-68	0.346029	0.958	0.987	3.76313e-64	Basal cells_FABP4 high	RPL37A
5.64251e-68	0.423595	0.931	0.976	1.04996e-63	Basal cells_FABP4 high	RPL22
3.30304e-62	0.273911	0.979	0.995	6.14629e-58	Basal cells_FABP4 high	RPL27A
5.43848e-60	0.273586	0.175	0.42	1.01199e-55	Basal cells_FABP4 high	NDUFB6
9.71116e-59	0.359339	0.193	0.44	1.80705e-54	Basal cells_FABP4 high	DST
1.3771e-58	0.302452	0.965	0.99	2.56251e-54	Basal cells_FABP4 high	RPS9
6.26651e-58	6.81714	0.138	0.059	1.16607e-53	Basal cells_FABP4 high	ENSOARG00020004525
2.58441e-57	0.99651	0.522	0.432	4.80907e-53	Basal cells_FABP4 high	ENSOARG00020023904
5.1709e-57	0.332325	0.953	0.986	9.622e-53	Basal cells_FABP4 high	RPS25.3
1.36159e-54	0.288739	0.968	0.988	2.53365e-50	Basal cells_FABP4 high	RPS10
1.61671e-53	0.25919	0.984	0.995	3.00837e-49	Basal cells_FABP4 high	ENSOARG00020004572
4.96299e-52	0.304511	0.213	0.465	9.23514e-48	Basal cells_FABP4 high	ENSOARG00020026470
3.10796e-50	0.256116	0.977	0.991	5.78329e-46	Basal cells_FABP4 high	RPL7A
3.72435e-50	0.35639	0.934	0.978	6.93027e-46	Basal cells_FABP4 high	RPL36
1.75518e-49	0.341223	0.126	0.316	3.26604e-45	Basal cells_FABP4 high	ENSOARG00020025903
1.06527e-48	0.311376	0.95	0.99	1.98225e-44	Basal cells_FABP4 high	ENSOARG00020011816
1.73742e-47	0.25688	0.325	0.633	3.233e-43	Basal cells_FABP4 high	ADH5
4.04032e-46	0.282585	0.345	0.675	7.51822e-42	Basal cells_FABP4 high	RPS26
1.17666e-45	0.294113	0.77	0.627	2.18954e-41	Basal cells_FABP4 high	S100A2
1.16922e-42	0.876724	0.491	0.41	2.17569e-38	Basal cells_FABP4 high	ENSOARG00020023920
1.3371e-42	0.293417	0.25	0.504	2.48808e-38	Basal cells_FABP4 high	GAMT
2.49052e-42	0.298754	0.17	0.369	4.63436e-38	Basal cells_FABP4 high	ENSOARG00020026385
5.87309e-42	0.359469	0.897	0.971	1.09287e-37	Basal cells_FABP4 high	ENSOARG00020012335
1.02937e-41	0.260967	0.331	0.624	1.91545e-37	Basal cells_FABP4 high	UQCRFS1
1.57125e-41	0.268127	0.151	0.335	2.92378e-37	Basal cells_FABP4 high	ANAPC2
1.56749e-40	0.287552	0.2	0.414	2.91679e-36	Basal cells_FABP4 high	ENSOARG00020019097
8.73946e-40	0.319623	0.115	0.275	1.62624e-35	Basal cells_FABP4 high	MMUT
1.33919e-39	0.298606	0.928	0.98	2.49197e-35	Basal cells_FABP4 high	ENSOARG00020001330
1.66459e-39	0.37656	0.245	0.49	3.09747e-35	Basal cells_FABP4 high	ETFA
4.48759e-39	0.349823	0.152	0.335	8.35052e-35	Basal cells_FABP4 high	ENSOARG00020010802
4.7512e-38	0.275967	0.97	0.991	8.84104e-34	Basal cells_FABP4 high	RPLP0
5.31325e-38	0.282715	0.125	0.286	9.88689e-34	Basal cells_FABP4 high	SOX2
8.63514e-38	0.422384	0.236	0.472	1.60683e-33	Basal cells_FABP4 high	ENSOARG00020014432
9.19244e-38	0.455283	0.843	0.941	1.71053e-33	Basal cells_FABP4 high	ENSOARG00020019322
1.32993e-37	0.630452	0.578	0.485	2.47473e-33	Basal cells_FABP4 high	ENSOARG00020015582
1.92211e-37	0.393668	0.599	0.482	3.57665e-33	Basal cells_FABP4 high	KRT17
3.7574e-37	0.279564	0.131	0.293	6.99176e-33	Basal cells_FABP4 high	ABHD11
7.35372e-37	0.259832	0.362	0.674	1.36838e-32	Basal cells_FABP4 high	MDH1
2.04347e-36	0.388972	0.315	0.597	3.80249e-32	Basal cells_FABP4 high	NDUFB5
2.36305e-36	0.26515	0.121	0.275	4.39716e-32	Basal cells_FABP4 high	UXT
2.51578e-36	0.315563	0.127	0.284	4.68137e-32	Basal cells_FABP4 high	TXN2
3.56096e-36	0.258327	0.108	0.256	6.62623e-32	Basal cells_FABP4 high	HINT2
3.60744e-36	0.423169	0.286	0.546	6.71272e-32	Basal cells_FABP4 high	MPC2
6.90828e-36	0.305679	0.936	0.979	1.28549e-31	Basal cells_FABP4 high	RPL26
1.48099e-35	0.287282	0.273	0.52	2.75582e-31	Basal cells_FABP4 high	PCBD2
1.73788e-35	0.40859	0.281	0.533	3.23385e-31	Basal cells_FABP4 high	NDUFA7
3.84581e-35	0.350574	0.275	0.526	7.15628e-31	Basal cells_FABP4 high	NDUFV2
8.62684e-35	0.291611	0.968	0.989	1.60528e-30	Basal cells_FABP4 high	RPL35
1.83666e-33	0.30135	0.126	0.275	3.41766e-29	Basal cells_FABP4 high	MACROD1
2.59223e-33	0.286822	0.111	0.254	4.82362e-29	Basal cells_FABP4 high	DECR1
2.94549e-33	0.369401	0.189	0.375	5.48098e-29	Basal cells_FABP4 high	ENSOARG00020017987
9.84486e-33	1.04261	0.46	0.413	1.83193e-28	Basal cells_FABP4 high	TST
1.36256e-32	0.297441	0.168	0.337	2.53545e-28	Basal cells_FABP4 high	ACSF2
3.023e-31	0.493048	0.341	0.565	5.62519e-27	Basal cells_FABP4 high	ENSOARG00020007111
4.90043e-31	0.573299	0.33	0.593	9.11872e-27	Basal cells_FABP4 high	SYNE2
1.74326e-30	0.359332	0.267	0.492	3.24386e-26	Basal cells_FABP4 high	SNRNP25
3.89379e-30	0.342379	0.393	0.701	7.24557e-26	Basal cells_FABP4 high	NDUFA2
9.3242e-28	0.302912	0.387	0.685	1.73505e-23	Basal cells_FABP4 high	DBI
9.79425e-28	0.321504	0.265	0.478	1.82251e-23	Basal cells_FABP4 high	BLVRB
3.97679e-26	0.352173	0.123	0.253	7.4e-22	Basal cells_FABP4 high	ENSOARG00020007668
4.24457e-26	0.308362	0.15	0.292	7.8983e-22	Basal cells_FABP4 high	ENSOARG00020014406
5.34326e-25	0.271797	0.912	0.969	9.94275e-21	Basal cells_FABP4 high	ENSOARG00020019356
7.31861e-25	1.15037	0.431	0.436	1.36185e-20	Basal cells_FABP4 high	ALDH1A1
2.21735e-24	0.345627	0.129	0.255	4.12605e-20	Basal cells_FABP4 high	PHGDH
3.46283e-24	0.265378	0.976	0.993	6.44363e-20	Basal cells_FABP4 high	RPL37
5.31106e-24	6.67936	0.148	0.093	9.88281e-20	Basal cells_FABP4 high	ENSOARG00020015678
4.19196e-23	0.404	0.12	0.24	7.8004e-19	Basal cells_FABP4 high	ME1
6.71073e-23	0.459646	0.138	0.269	1.24873e-18	Basal cells_FABP4 high	ACAT1
1.37331e-22	0.294198	0.848	0.961	2.55546e-18	Basal cells_FABP4 high	RPS21
1.599e-22	0.409587	0.125	0.247	2.97542e-18	Basal cells_FABP4 high	GRTP1
2.12642e-22	0.464301	0.28	0.483	3.95683e-18	Basal cells_FABP4 high	CSRP2
3.55078e-22	0.565367	0.221	0.404	6.60729e-18	Basal cells_FABP4 high	NOP53
4.20859e-22	0.327947	0.834	0.956	7.83135e-18	Basal cells_FABP4 high	ENSOARG00020008122
6.57515e-22	0.370701	0.367	0.636	1.2235e-17	Basal cells_FABP4 high	NDUFS8
7.22776e-22	0.373185	0.372	0.646	1.34494e-17	Basal cells_FABP4 high	SNRPG
3.79108e-21	0.268988	0.101	0.201	7.05444e-17	Basal cells_FABP4 high	ENSOARG00020014505
9.55249e-21	0.41655	0.904	0.995	1.77753e-16	Basal cells_FABP4 high	ENSOARG00020000003
1.68289e-20	0.39103	0.316	0.526	3.13152e-16	Basal cells_FABP4 high	CYCS
3.16558e-19	0.307072	0.428	0.727	5.89052e-15	Basal cells_FABP4 high	NDUFB10
1.80819e-17	0.402437	0.348	0.583	3.36468e-13	Basal cells_FABP4 high	ENSOARG00020014986
2.10016e-17	0.548506	0.137	0.247	3.90797e-13	Basal cells_FABP4 high	ACAA2
2.65982e-17	0.26892	0.432	0.699	4.94939e-13	Basal cells_FABP4 high	ENSOARG00020001599
3.32396e-17	0.367172	0.329	0.549	6.18522e-13	Basal cells_FABP4 high	PLP2
4.69245e-17	0.620208	0.198	0.338	8.73171e-13	Basal cells_FABP4 high	DSP
1.12002e-14	1.22862	0.55	0.668	2.08413e-10	Basal cells_FABP4 high	PRDX6
1.23561e-14	0.543432	0.937	0.997	2.29922e-10	Basal cells_FABP4 high	ENSOARG00020000005
1.50636e-14	0.371048	0.717	0.909	2.80303e-10	Basal cells_FABP4 high	ENSOARG00020017285
1.5364e-14	0.553737	0.271	0.448	2.85892e-10	Basal cells_FABP4 high	ENSOARG00020020724
2.53248e-14	0.253245	0.127	0.214	4.71243e-10	Basal cells_FABP4 high	CD24
4.78298e-14	0.48991	0.395	0.643	8.90017e-10	Basal cells_FABP4 high	UQCRB
8.29885e-14	0.410818	0.769	0.907	1.54425e-09	Basal cells_FABP4 high	ENSOARG00020013487
1.85497e-13	0.372378	0.745	0.916	3.45173e-09	Basal cells_FABP4 high	ENSOARG00020010128
4.03101e-13	0.610536	0.154	0.254	7.50091e-09	Basal cells_FABP4 high	ENSOARG00020019330
6.00518e-13	0.304213	0.845	0.962	1.11744e-08	Basal cells_FABP4 high	ENSOARG00020021369
1.50818e-12	0.319177	0.773	0.934	2.80642e-08	Basal cells_FABP4 high	ENSOARG00020020312
3.07271e-12	0.417069	0.406	0.664	5.71771e-08	Basal cells_FABP4 high	PRDX5
1.39032e-11	0.423932	0.703	0.894	2.5871e-07	Basal cells_FABP4 high	ATP5MC2
2.76892e-11	0.31749	0.503	0.797	5.15241e-07	Basal cells_FABP4 high	RPL17.2
3.12245e-10	0.533709	0.54	0.607	5.81025e-06	Basal cells_FABP4 high	ENSOARG00020010357
1.69909e-09	0.358183	0.127	0.197	3.16167e-05	Basal cells_FABP4 high	KRT7
1.91333e-09	0.370876	0.181	0.273	3.56033e-05	Basal cells_FABP4 high	ENSOARG00020009302
2.51875e-09	0.335985	0.768	0.928	4.6869e-05	Basal cells_FABP4 high	ENSOARG00020017190
3.71135e-09	0.574454	0.244	0.371	6.90608e-05	Basal cells_FABP4 high	CLCA2
5.0999e-09	0.410423	0.419	0.653	9.48989e-05	Basal cells_FABP4 high	PPP1R14B
6.94518e-09	0.495875	0.109	0.174	0.000129236	Basal cells_FABP4 high	THEM5
1.64444e-08	0.516583	0.245	0.368	0.000305997	Basal cells_FABP4 high	KRT5
2.16895e-08	0.460277	0.11	0.173	0.000403598	Basal cells_FABP4 high	ENSOARG00020024411
8.9584e-08	0.455046	0.436	0.431	0.00166698	Basal cells_FABP4 high	KRT15
1.92303e-07	0.293327	0.761	0.941	0.00357837	Basal cells_FABP4 high	UQCRH
3.23979e-07	0.42627	0.376	0.544	0.00602861	Basal cells_FABP4 high	ENSOARG00020006888
4.65796e-07	0.608061	0.286	0.431	0.00866753	Basal cells_FABP4 high	IDH1
6.44474e-07	0.401254	0.466	0.719	0.0119924	Basal cells_FABP4 high	ENSOARG00020018193
6.69745e-07	0.418357	0.505	0.782	0.0124626	Basal cells_FABP4 high	ENSOARG00020012134
1.33786e-06	0.82326	0.163	0.246	0.0248949	Basal cells_FABP4 high	MCEE
1.41668e-06	0.467189	0.433	0.672	0.0263616	Basal cells_FABP4 high	UQCRQ
2.04283e-06	0.396813	0.477	0.74	0.0380129	Basal cells_FABP4 high	COX6B1
0	2.42058	0.999	0.509	0	Basal cells_IGFBP6 high	IGFBP6
0	2.00152	0.927	0.178	0	Basal cells_IGFBP6 high	CD24
0	1.81305	0.969	0.527	0	Basal cells_IGFBP6 high	IGFBP2
0	1.74797	0.876	0.163	0	Basal cells_IGFBP6 high	KRT7
0	1.31463	0.993	0.404	0	Basal cells_IGFBP6 high	KRT15
0	1.28528	0.744	0.181	0	Basal cells_IGFBP6 high	BHLHE40
0	1.26166	0.628	0.188	0	Basal cells_IGFBP6 high	CLDN4
0	1.21577	0.944	0.39	0	Basal cells_IGFBP6 high	ATF3
0	1.19652	0.813	0.194	0	Basal cells_IGFBP6 high	PDLIM4
0	1.16208	0.999	0.953	0	Basal cells_IGFBP6 high	RPS6
0	1.12339	0.604	0.09	0	Basal cells_IGFBP6 high	TFF3
0	1.09543	0.877	0.398	0	Basal cells_IGFBP6 high	Metazoa-SRP.8
0	1.08003	0.928	0.45	0	Basal cells_IGFBP6 high	GADD45A
0	1.06774	0.861	0.342	0	Basal cells_IGFBP6 high	KRT5
0	1.05718	1	0.61	0	Basal cells_IGFBP6 high	S100A2
0	1.03474	0.705	0.216	0	Basal cells_IGFBP6 high	COL17A1
0	1.02563	0.564	0.088	0	Basal cells_IGFBP6 high	CLDN7
0	1.01907	0.971	0.633	0	Basal cells_IGFBP6 high	ENSOARG00020019793
0	1.01545	0.744	0.28	0	Basal cells_IGFBP6 high	KRT19
0	0.96828	0.777	0.315	0	Basal cells_IGFBP6 high	DSP
0	0.964363	0.795	0.34	0	Basal cells_IGFBP6 high	Metazoa-SRP.6
0	0.962501	0.982	0.675	0	Basal cells_IGFBP6 high	ENSOARG00020025507
0	0.930714	0.799	0.388	0	Basal cells_IGFBP6 high	MYC
0	0.903073	0.602	0.126	0	Basal cells_IGFBP6 high	KRT18
0	0.875272	0.938	0.494	0	Basal cells_IGFBP6 high	ENSOARG00020002084
0	0.872966	0.648	0.234	0	Basal cells_IGFBP6 high	KLF5
0	0.805853	0.875	0.448	0	Basal cells_IGFBP6 high	ENSOARG00020005804
0	0.804502	0.998	0.891	0	Basal cells_IGFBP6 high	RPS2
0	0.796275	0.999	0.905	0	Basal cells_IGFBP6 high	ENSOARG00020014163
0	0.792309	0.999	0.908	0	Basal cells_IGFBP6 high	EEF1D
0	0.785293	1	0.969	0	Basal cells_IGFBP6 high	ENSOARG00020025291
0	0.782048	0.999	0.937	0	Basal cells_IGFBP6 high	ENSOARG00020019322
0	0.764007	0.545	0.14	0	Basal cells_IGFBP6 high	EPCAM
0	0.762482	0.972	0.659	0	Basal cells_IGFBP6 high	ENSOARG00020007903
0	0.760924	1	0.997	0	Basal cells_IGFBP6 high	RPS8
0	0.757017	0.487	0.074	0	Basal cells_IGFBP6 high	ENSOARG00020019962
0	0.75292	1	0.993	0	Basal cells_IGFBP6 high	ENSOARG00020013429
0	0.748862	0.96	0.732	0	Basal cells_IGFBP6 high	ENSOARG00020022770
0	0.74498	0.983	0.712	0	Basal cells_IGFBP6 high	ENSOARG00020003728
0	0.741713	1	0.986	0	Basal cells_IGFBP6 high	RPS20
0	0.740013	0.923	0.562	0	Basal cells_IGFBP6 high	S100A11
0	0.73624	1	0.987	0	Basal cells_IGFBP6 high	ENSOARG00020001437
0	0.731025	1	0.991	0	Basal cells_IGFBP6 high	RPL7A
0	0.728903	1	0.979	0	Basal cells_IGFBP6 high	RPL3
0	0.727836	1	0.995	0	Basal cells_IGFBP6 high	RPL32
0	0.725012	0.654	0.266	0	Basal cells_IGFBP6 high	SOX2
0	0.723205	1	0.99	0	Basal cells_IGFBP6 high	RPLP0
0	0.722688	1	0.979	0	Basal cells_IGFBP6 high	ENSOARG00020016079
0	0.721291	1	0.989	0	Basal cells_IGFBP6 high	ENSOARG00020002748
0	0.701105	0.87	0.503	0	Basal cells_IGFBP6 high	CLIC1
0	0.699152	0.999	0.978	0	Basal cells_IGFBP6 high	ENSOARG00020001330
0	0.691561	1	0.984	0	Basal cells_IGFBP6 high	RPL13
0	0.688667	0.516	0.141	0	Basal cells_IGFBP6 high	DSG2
0	0.684896	1	0.982	0	Basal cells_IGFBP6 high	RACK1
0	0.681804	0.644	0.295	0	Basal cells_IGFBP6 high	ETS2
0	0.680761	0.533	0.182	0	Basal cells_IGFBP6 high	CXADR
0	0.680293	0.68	0.296	0	Basal cells_IGFBP6 high	ENSOARG00020025903
0	0.674368	1	0.991	0	Basal cells_IGFBP6 high	RPS5
0	0.67252	0.952	0.682	0	Basal cells_IGFBP6 high	CSTB
0	0.6675	0.999	0.953	0	Basal cells_IGFBP6 high	ENSOARG00020004797
0	0.663344	1	0.997	0	Basal cells_IGFBP6 high	RPLP1
0	0.662017	1	0.965	0	Basal cells_IGFBP6 high	ENSOARG00020002301
0	0.661822	1	0.981	0	Basal cells_IGFBP6 high	ENSOARG00020013105
0	0.657169	1	0.995	0	Basal cells_IGFBP6 high	ENSOARG00020022219
0	0.656506	1	0.995	0	Basal cells_IGFBP6 high	RPS18
0	0.649828	0.999	0.923	0	Basal cells_IGFBP6 high	EEF1G
0	0.648306	1	0.987	0	Basal cells_IGFBP6 high	RPS10
0	0.645626	1	0.988	0	Basal cells_IGFBP6 high	RPL11
0	0.636079	1	0.974	0	Basal cells_IGFBP6 high	RPL22
0	0.633748	1	0.976	0	Basal cells_IGFBP6 high	RPL36
0	0.627578	1	0.984	0	Basal cells_IGFBP6 high	RPL29
0	0.624508	1	0.994	0	Basal cells_IGFBP6 high	RPL31
0	0.622662	1	0.995	0	Basal cells_IGFBP6 high	RPL27A
0	0.617049	1	0.992	0	Basal cells_IGFBP6 high	RPL37
0	0.61632	1	0.955	0	Basal cells_IGFBP6 high	ENSOARG00020004826
0	0.615306	0.376	0.032	0	Basal cells_IGFBP6 high	KRT8
0	0.611938	0.858	0.383	0	Basal cells_IGFBP6 high	IGFBP5
0	0.611306	0.454	0.121	0	Basal cells_IGFBP6 high	RNF19B
0	0.610338	0.993	0.803	0	Basal cells_IGFBP6 high	UBC
0	0.609124	1	0.988	0	Basal cells_IGFBP6 high	RPL18
0	0.606542	0.578	0.219	0	Basal cells_IGFBP6 high	IER3
0	0.598064	1	0.985	0	Basal cells_IGFBP6 high	RPL23
0	0.597145	0.918	0.529	0	Basal cells_IGFBP6 high	PLP2
0	0.596761	0.986	0.723	0	Basal cells_IGFBP6 high	BTG1
0	0.595905	0.981	0.746	0	Basal cells_IGFBP6 high	ENSOARG00020019951
0	0.590189	1	0.984	0	Basal cells_IGFBP6 high	RPSA
0	0.588547	0.549	0.2	0	Basal cells_IGFBP6 high	GMDS
0	0.584791	1	0.989	0	Basal cells_IGFBP6 high	RPS9
0	0.582331	1	0.977	0	Basal cells_IGFBP6 high	RPL26
0	0.580537	0.296	0.032	0	Basal cells_IGFBP6 high	ITPKC
0	0.577999	1	0.995	0	Basal cells_IGFBP6 high	ENSOARG00020004572
0	0.573611	1	0.982	0	Basal cells_IGFBP6 high	ENSOARG00020022050
0	0.570818	0.384	0.072	0	Basal cells_IGFBP6 high	TNNI1
0	0.569829	0.735	0.388	0	Basal cells_IGFBP6 high	ENSOARG00020006176
0	0.568038	1	0.986	0	Basal cells_IGFBP6 high	ENSOARG00020022981
0	0.567942	0.391	0.054	0	Basal cells_IGFBP6 high	WFDC2
0	0.56544	0.571	0.232	0	Basal cells_IGFBP6 high	ZBTB7C
0	0.564687	1	0.986	0	Basal cells_IGFBP6 high	ENSOARG00020018336
0	0.562705	1	0.994	0	Basal cells_IGFBP6 high	RPL10
0	0.559474	0.79	0.414	0	Basal cells_IGFBP6 high	SSBP4
0	0.55807	1	0.989	0	Basal cells_IGFBP6 high	RPL18A
0	0.554626	0.996	0.867	0	Basal cells_IGFBP6 high	SSR4
0	0.553479	1	0.989	0	Basal cells_IGFBP6 high	ENSOARG00020021320
0	0.550182	1	0.988	0	Basal cells_IGFBP6 high	RPL35
0	0.547156	0.222	0.009	0	Basal cells_IGFBP6 high	HAMP
0	0.542496	1	0.977	0	Basal cells_IGFBP6 high	ENSOARG00020012848
0	0.537081	0.725	0.38	0	Basal cells_IGFBP6 high	ISYNA1
0	0.536887	0.998	0.778	0	Basal cells_IGFBP6 high	JUN
0	0.535881	0.234	0.013	0	Basal cells_IGFBP6 high	SERPINA1
0	0.535132	0.572	0.235	0	Basal cells_IGFBP6 high	HSD17B2
0	0.531542	1	0.986	0	Basal cells_IGFBP6 high	RPL19
0	0.524727	0.999	0.966	0	Basal cells_IGFBP6 high	ENSOARG00020009956
0	0.522559	0.554	0.24	0	Basal cells_IGFBP6 high	OXR1
0	0.517268	1	0.986	0	Basal cells_IGFBP6 high	RPL37A
0	0.515121	1	0.989	0	Basal cells_IGFBP6 high	PIK3C2A
0	0.513259	1	0.986	0	Basal cells_IGFBP6 high	ENSOARG00020023953
0	0.511592	0.541	0.226	0	Basal cells_IGFBP6 high	FERMT1
0	0.505044	0.888	0.501	0	Basal cells_IGFBP6 high	PDLIM1
0	0.503411	0.452	0.154	0	Basal cells_IGFBP6 high	ENSOARG00020013946
0	0.50122	0.998	0.896	0	Basal cells_IGFBP6 high	RPL4
0	0.497937	0.983	0.461	0	Basal cells_IGFBP6 high	ENSOARG00020015582
0	0.49788	1	0.984	0	Basal cells_IGFBP6 high	RPL28
0	0.495843	0.7	0.367	0	Basal cells_IGFBP6 high	KLF6
0	0.495288	0.911	0.637	0	Basal cells_IGFBP6 high	rpl23a
0	0.493342	0.964	0.717	0	Basal cells_IGFBP6 high	PSMG4
0	0.493029	0.999	0.967	0	Basal cells_IGFBP6 high	ENSOARG00020019356
0	0.490862	0.406	0.139	0	Basal cells_IGFBP6 high	IRX3
0	0.488343	1	0.98	0	Basal cells_IGFBP6 high	ENSOARG00020010263
0	0.4859	1	0.989	0	Basal cells_IGFBP6 high	RPL8
0	0.484321	1	0.988	0	Basal cells_IGFBP6 high	RPL24
0	0.482215	0.996	0.887	0	Basal cells_IGFBP6 high	ATP5MC2
0	0.480307	0.788	0.345	0	Basal cells_IGFBP6 high	BTG2
0	0.480088	0.999	0.923	0	Basal cells_IGFBP6 high	ENSOARG00020017190
0	0.471754	0.955	0.666	0	Basal cells_IGFBP6 high	ENSOARG00020007966
0	0.469491	0.601	0.293	0	Basal cells_IGFBP6 high	ANXA2
0	0.469296	0.496	0.159	0	Basal cells_IGFBP6 high	CADM1
0	0.469194	1	0.993	0	Basal cells_IGFBP6 high	RPS11
0	0.466717	0.931	0.658	0	Basal cells_IGFBP6 high	RPS26
0	0.465256	0.324	0.037	0	Basal cells_IGFBP6 high	ENSOARG00020025260
0	0.464154	1	0.984	0	Basal cells_IGFBP6 high	RPL9
0	0.462741	0.579	0.269	0	Basal cells_IGFBP6 high	ABRACL
0	0.46178	0.681	0.36	0	Basal cells_IGFBP6 high	ENSOARG00020022058
0	0.461748	0.616	0.272	0	Basal cells_IGFBP6 high	NUDT14
0	0.460852	0.493	0.204	0	Basal cells_IGFBP6 high	PDZK1IP1
0	0.460581	0.836	0.479	0	Basal cells_IGFBP6 high	PNRC1
0	0.460359	0.929	0.529	0	Basal cells_IGFBP6 high	ENSOARG00020017172
0	0.456061	0.97	0.757	0	Basal cells_IGFBP6 high	EIF3G
0	0.450606	0.28	0.071	0	Basal cells_IGFBP6 high	F3
0	0.450472	0.428	0.167	0	Basal cells_IGFBP6 high	ENSOARG00020025395
0	0.448262	0.814	0.492	0	Basal cells_IGFBP6 high	POLR1D
0	0.447378	0.997	0.929	0	Basal cells_IGFBP6 high	ENSOARG00020020312
0	0.444967	0.999	0.985	0	Basal cells_IGFBP6 high	RPS25.3
0	0.443817	0.485	0.143	0	Basal cells_IGFBP6 high	PDGFA
0	0.443217	0.365	0.085	0	Basal cells_IGFBP6 high	ENSOARG00020013289
0	0.442034	1	0.993	0	Basal cells_IGFBP6 high	RPS12
0	0.441877	1	0.969	0	Basal cells_IGFBP6 high	ENSOARG00020012335
0	0.422308	0.303	0.08	0	Basal cells_IGFBP6 high	SERPINB5
0	0.422175	0.584	0.285	0	Basal cells_IGFBP6 high	ENSOARG00020000678
0	0.421825	0.887	0.498	0	Basal cells_IGFBP6 high	PTGR1
0	0.421282	0.203	0.017	0	Basal cells_IGFBP6 high	AGR2
0	0.417975	0.267	0.043	0	Basal cells_IGFBP6 high	MEGF11
0	0.41779	0.573	0.224	0	Basal cells_IGFBP6 high	EGR1
0	0.41596	0.722	0.404	0	Basal cells_IGFBP6 high	ENSOARG00020006104
0	0.410621	0.737	0.343	0	Basal cells_IGFBP6 high	ENSOARG00020017637
0	0.407035	1	0.966	0	Basal cells_IGFBP6 high	RPL30
0	0.403725	0.53	0.25	0	Basal cells_IGFBP6 high	MYL6B
0	0.403563	0.337	0.107	0	Basal cells_IGFBP6 high	MPZL2
0	0.401574	1	0.994	0	Basal cells_IGFBP6 high	ENSOARG00020026205
0	0.400867	0.4	0.144	0	Basal cells_IGFBP6 high	FGFR2
0	0.400175	0.357	0.122	0	Basal cells_IGFBP6 high	PERP
0	0.39626	0.355	0.089	0	Basal cells_IGFBP6 high	RETREG1
0	0.395275	0.279	0.088	0	Basal cells_IGFBP6 high	ENSOARG00020011601
0	0.394991	0.995	0.877	0	Basal cells_IGFBP6 high	PFDN5
0	0.394348	0.999	0.805	0	Basal cells_IGFBP6 high	FOS
0	0.391942	0.937	0.688	0	Basal cells_IGFBP6 high	EIF3H
0	0.390505	0.959	0.589	0	Basal cells_IGFBP6 high	ENSOARG00020010357
0	0.39025	1	0.991	0	Basal cells_IGFBP6 high	UBA52
0	0.386613	1	0.988	0	Basal cells_IGFBP6 high	RPL14
0	0.385888	0.882	0.534	0	Basal cells_IGFBP6 high	ENSOARG00020017201
0	0.379986	0.59	0.309	0	Basal cells_IGFBP6 high	CHD3
0	0.378697	0.651	0.338	0	Basal cells_IGFBP6 high	ENSOARG00020007752
0	0.377333	0.514	0.225	0	Basal cells_IGFBP6 high	CREBRF
0	0.376517	1	0.989	0	Basal cells_IGFBP6 high	ENSOARG00020011816
0	0.376466	0.988	0.827	0	Basal cells_IGFBP6 high	EIF3K
0	0.376404	0.622	0.308	0	Basal cells_IGFBP6 high	PRXL2B
0	0.376061	0.284	0.059	0	Basal cells_IGFBP6 high	WNK4
0	0.3727	1	0.992	0	Basal cells_IGFBP6 high	RPS27A
0	0.372361	0.8	0.507	0	Basal cells_IGFBP6 high	UQCC2
0	0.371423	0.394	0.161	0	Basal cells_IGFBP6 high	RAB25
0	0.371101	0.947	0.665	0	Basal cells_IGFBP6 high	GAPDH
0	0.370913	0.284	0.051	0	Basal cells_IGFBP6 high	HPN
0	0.369127	0.464	0.235	0	Basal cells_IGFBP6 high	GRTP1
0	0.36883	0.763	0.466	0	Basal cells_IGFBP6 high	IMPDH2
0	0.365754	0.516	0.251	0	Basal cells_IGFBP6 high	C4orf48
0	0.365523	0.376	0.15	0	Basal cells_IGFBP6 high	MAPK13
0	0.364537	0.298	0.083	0	Basal cells_IGFBP6 high	ENSOARG00020002139
0	0.363233	0.328	0.125	0	Basal cells_IGFBP6 high	BAIAP2L1
0	0.363165	1	0.988	0	Basal cells_IGFBP6 high	FAU
0	0.36113	0.338	0.121	0	Basal cells_IGFBP6 high	EGFR
0	0.360989	0.694	0.353	0	Basal cells_IGFBP6 high	CCNL1
0	0.35815	0.323	0.129	0	Basal cells_IGFBP6 high	ENSOARG00020016651
0	0.358054	1	0.958	0	Basal cells_IGFBP6 high	RPS21
0	0.356754	0.676	0.38	0	Basal cells_IGFBP6 high	ARID5B
0	0.353524	0.917	0.646	0	Basal cells_IGFBP6 high	EIF3F
0	0.352428	0.213	0.038	0	Basal cells_IGFBP6 high	CA3
0	0.348446	0.907	0.643	0	Basal cells_IGFBP6 high	C9orf16
0	0.348315	0.195	0.014	0	Basal cells_IGFBP6 high	ENSOARG00020005400
0	0.347696	0.803	0.555	0	Basal cells_IGFBP6 high	KIF5B
0	0.346541	0.767	0.552	0	Basal cells_IGFBP6 high	ENSOARG00020007111
0	0.346117	0.7	0.428	0	Basal cells_IGFBP6 high	ENSOARG00020017291
0	0.343074	0.38	0.172	0	Basal cells_IGFBP6 high	KIAA1217
0	0.342977	0.35	0.146	0	Basal cells_IGFBP6 high	CYP51A1
0	0.342478	0.316	0.112	0	Basal cells_IGFBP6 high	LAMA3
0	0.341542	0.203	0.07	0	Basal cells_IGFBP6 high	ENSOARG00020021657
0	0.336359	0.986	0.823	0	Basal cells_IGFBP6 high	RPL27
0	0.33613	0.224	0.052	0	Basal cells_IGFBP6 high	TNFAIP3
0	0.333766	1	0.987	0	Basal cells_IGFBP6 high	ENSOARG00020020958
0	0.332261	0.473	0.223	0	Basal cells_IGFBP6 high	NME4
0	0.330416	0.467	0.163	0	Basal cells_IGFBP6 high	ENSOARG00020006805
0	0.327111	0.998	0.935	0	Basal cells_IGFBP6 high	ENSOARG00020026005
0	0.326889	0.333	0.127	0	Basal cells_IGFBP6 high	TFAP2A
0	0.326361	0.315	0.136	0	Basal cells_IGFBP6 high	ENSOARG00020025909
0	0.32157	0.352	0.112	0	Basal cells_IGFBP6 high	CPXM1
0	0.317168	0.996	0.903	0	Basal cells_IGFBP6 high	ENSOARG00020017285
0	0.313571	0.905	0.598	0	Basal cells_IGFBP6 high	LMNA
0	0.312996	0.232	0.043	0	Basal cells_IGFBP6 high	KCNG2
0	0.308302	0.283	0.068	0	Basal cells_IGFBP6 high	TOX3
0	0.307155	0.367	0.119	0	Basal cells_IGFBP6 high	ENSOARG00020019393
0	0.30662	0.868	0.607	0	Basal cells_IGFBP6 high	RPS12.1
0	0.305738	0.292	0.062	0	Basal cells_IGFBP6 high	RAMP1
0	0.304891	0.355	0.179	0	Basal cells_IGFBP6 high	HS3ST6
0	0.302077	0.764	0.357	0	Basal cells_IGFBP6 high	SFN
0	0.29906	0.869	0.54	0	Basal cells_IGFBP6 high	S100A13
0	0.296625	0.985	0.825	0	Basal cells_IGFBP6 high	EIF3M
0	0.293868	0.263	0.081	0	Basal cells_IGFBP6 high	ITGA2
0	0.292495	0.234	0.07	0	Basal cells_IGFBP6 high	EMP1
0	0.291909	0.386	0.159	0	Basal cells_IGFBP6 high	OSER1
0	0.291619	1	0.998	0	Basal cells_IGFBP6 high	ENSOARG00020020554
0	0.291323	0.999	0.953	0	Basal cells_IGFBP6 high	ENSOARG00020008122
0	0.287292	0.647	0.361	0	Basal cells_IGFBP6 high	ENSOARG00020002318
0	0.286346	0.202	0.039	0	Basal cells_IGFBP6 high	ELF5
0	0.283547	0.24	0.052	0	Basal cells_IGFBP6 high	PTPRZ1
0	0.282	0.879	0.616	0	Basal cells_IGFBP6 high	ENSOARG00020002907
0	0.278927	0.337	0.121	0	Basal cells_IGFBP6 high	tgif1
0	0.27701	1	0.959	0	Basal cells_IGFBP6 high	ENSOARG00020021369
0	0.276664	0.352	0.125	0	Basal cells_IGFBP6 high	FAM126A
0	0.276024	0.365	0.163	0	Basal cells_IGFBP6 high	SQLE
0	0.275532	0.98	0.805	0	Basal cells_IGFBP6 high	EIF3E
0	0.274499	0.229	0.05	0	Basal cells_IGFBP6 high	LCK
0	0.271755	0.87	0.594	0	Basal cells_IGFBP6 high	RTRAF
0	0.271093	0.829	0.417	0	Basal cells_IGFBP6 high	ANXA1
0	0.264402	0.256	0.063	0	Basal cells_IGFBP6 high	SAV1
0	0.26295	1	0.961	0	Basal cells_IGFBP6 high	HSP90AB1
0	0.260053	0.995	0.919	0	Basal cells_IGFBP6 high	ENSOARG00020009052
0	0.258975	0.272	0.083	0	Basal cells_IGFBP6 high	SOCS3
0	0.258963	0.267	0.113	0	Basal cells_IGFBP6 high	DLK2
0	0.258647	0.483	0.253	0	Basal cells_IGFBP6 high	NFKBIZ
0	0.258536	0.237	0.088	0	Basal cells_IGFBP6 high	TNFRSF13B
0	0.258048	0.288	0.132	0	Basal cells_IGFBP6 high	TMPRSS11A
0	0.254711	0.644	0.373	0	Basal cells_IGFBP6 high	S100A16
0	0.254242	0.921	0.658	0	Basal cells_IGFBP6 high	PABPC1
0	0.251715	0.22	0.058	0	Basal cells_IGFBP6 high	STARD10
5.93817e-301	0.313234	0.405	0.237	1.10498e-296	Basal cells_IGFBP6 high	TMEM238
5.70419e-281	0.286649	0.214	0.094	1.06144e-276	Basal cells_IGFBP6 high	AREG
1.80504e-135	0.310369	0.65	0.549	3.35882e-131	Basal cells_IGFBP6 high	ENSOARG00020004948
0	2.58095	0.996	0.343	0	Basal cells_CA1 high	CA1
0	2.36427	0.726	0.14	0	Basal cells_CA1 high	S100A8
0	2.33606	0.995	0.346	0	Basal cells_CA1 high	TST
0	2.0846	0.999	0.423	0	Basal cells_CA1 high	KRT17
0	2.01854	0.132	0.014	0	Basal cells_CA1 high	ENSOARG00020026082
0	1.99849	0.715	0.175	0	Basal cells_CA1 high	S100A12
0	1.99841	0.993	0.368	0	Basal cells_CA1 high	ENSOARG00020023904
0	1.94887	0.99	0.343	0	Basal cells_CA1 high	ENSOARG00020023920
0	1.74665	0.129	0.014	0	Basal cells_CA1 high	ENSOARG00020026068
0	1.71055	0.987	0.56	0	Basal cells_CA1 high	CHCHD10
0	1.58928	0.992	0.629	0	Basal cells_CA1 high	PRDX6
0	1.58426	0.999	0.585	0	Basal cells_CA1 high	S100A2
0	1.58131	0.965	0.334	0	Basal cells_CA1 high	C15orf48
0	1.54761	1	0.99	0	Basal cells_CA1 high	COX3
0	1.54082	0.988	0.427	0	Basal cells_CA1 high	ENSOARG00020015582
0	1.50045	0.954	0.369	0	Basal cells_CA1 high	SQOR
0	1.49201	0.86	0.203	0	Basal cells_CA1 high	ENSOARG00020009302
0	1.45228	0.623	0.139	0	Basal cells_CA1 high	ENSOARG00020000744
0	1.40735	0.912	0.246	0	Basal cells_CA1 high	SELENBP1
0	1.39148	0.921	0.247	0	Basal cells_CA1 high	UGT1A1
0	1.38982	0.89	0.342	0	Basal cells_CA1 high	DHRS7
0	1.35958	1	0.984	0	Basal cells_CA1 high	COX1
0	1.26284	0.99	0.763	0	Basal cells_CA1 high	ENSOARG00020011058
0	1.25115	0.747	0.233	0	Basal cells_CA1 high	SLC16A1
0	1.23584	0.99	0.804	0	Basal cells_CA1 high	MGST3
0	1.20496	0.865	0.484	0	Basal cells_CA1 high	CYCS
0	1.19653	0.711	0.14	0	Basal cells_CA1 high	ENSOARG00020014505
0	1.18237	0.822	0.228	0	Basal cells_CA1 high	ENSOARG00020014406
0	1.13398	0.898	0.412	0	Basal cells_CA1 high	ETHE1
0	1.11885	0.908	0.433	0	Basal cells_CA1 high	ENSOARG00020017413
0	1.11599	0.961	0.688	0	Basal cells_CA1 high	ENSOARG00020018193
0	1.0951	0.795	0.327	0	Basal cells_CA1 high	SFN
0	1.05884	0.689	0.332	0	Basal cells_CA1 high	ENSOARG00020014591
0	1.03992	0.857	0.341	0	Basal cells_CA1 high	AK2
0	1.03411	0.614	0.152	0	Basal cells_CA1 high	FABP4
0	1.03244	0.954	0.681	0	Basal cells_CA1 high	COX5A
0	1.02561	0.52	0.096	0	Basal cells_CA1 high	ENSOARG00020022244
0	1.00891	0.797	0.303	0	Basal cells_CA1 high	CMBL
0	1.00269	0.931	0.639	0	Basal cells_CA1 high	UQCRQ
0	0.994624	0.984	0.823	0	Basal cells_CA1 high	ENSOARG00020016302
0	0.991918	0.971	0.756	0	Basal cells_CA1 high	UQCR10
0	0.989185	0.786	0.351	0	Basal cells_CA1 high	SOD2
0	0.988821	0.821	0.317	0	Basal cells_CA1 high	CLCA2
0	0.988646	0.762	0.28	0	Basal cells_CA1 high	MGST1
0	0.952253	0.554	0.11	0	Basal cells_CA1 high	ENSOARG00020006419
0	0.944535	0.997	0.895	0	Basal cells_CA1 high	ENSOARG00020013487
0	0.929715	0.975	0.703	0	Basal cells_CA1 high	TSPO
0	0.91206	0.883	0.429	0	Basal cells_CA1 high	BLVRB
0	0.910823	0.551	0.099	0	Basal cells_CA1 high	ENSOARG00020014854
0	0.899982	1	0.971	0	Basal cells_CA1 high	COX2
0	0.890495	0.567	0.188	0	Basal cells_CA1 high	ENSOARG00020017319
0	0.886077	1	0.994	0	Basal cells_CA1 high	CYTB
0	0.866172	0.997	0.824	0	Basal cells_CA1 high	ND5
0	0.860022	0.984	0.871	0	Basal cells_CA1 high	ENSOARG00020022065
0	0.859906	0.953	0.712	0	Basal cells_CA1 high	COX6B1
0	0.848853	0.622	0.203	0	Basal cells_CA1 high	ENSOARG00020015070
0	0.842739	1	0.99	0	Basal cells_CA1 high	ND4
0	0.836736	0.905	0.416	0	Basal cells_CA1 high	AHCY
0	0.822064	0.933	0.618	0	Basal cells_CA1 high	PPP1R14B
0	0.801529	0.268	0.092	0	Basal cells_CA1 high	ENSOARG00020020785
0	0.799727	0.372	0.062	0	Basal cells_CA1 high	VNN2
0	0.792399	0.956	0.759	0	Basal cells_CA1 high	ENSOARG00020012134
0	0.792017	0.468	0.138	0	Basal cells_CA1 high	ENSOARG00020024411
0	0.790694	0.83	0.401	0	Basal cells_CA1 high	ENSOARG00020020724
0	0.788158	0.904	0.609	0	Basal cells_CA1 high	UQCRB
0	0.786972	0.998	0.946	0	Basal cells_CA1 high	COX4I1
0	0.785251	0.644	0.199	0	Basal cells_CA1 high	MCRIP2
0	0.778106	0.819	0.314	0	Basal cells_CA1 high	KRT5
0	0.770784	0.999	0.94	0	Basal cells_CA1 high	ND1
0	0.76905	0.728	0.332	0	Basal cells_CA1 high	ENSOARG00020017987
0	0.768884	0.8	0.367	0	Basal cells_CA1 high	ENSOARG00020019097
0	0.76743	0.737	0.289	0	Basal cells_CA1 high	ACSF2
0	0.752741	0.714	0.254	0	Basal cells_CA1 high	KRT19
0	0.750353	0.984	0.864	0	Basal cells_CA1 high	ATP5MC3
0	0.750054	0.827	0.422	0	Basal cells_CA1 high	UQCRC2
0	0.74614	0.484	0.108	0	Basal cells_CA1 high	ENSOARG00020014594
0	0.745335	0.849	0.471	0	Basal cells_CA1 high	NDUFB9
0	0.74189	0.734	0.261	0	Basal cells_CA1 high	ECM1
0	0.741308	0.944	0.699	0	Basal cells_CA1 high	NDUFA13
0	0.740341	0.827	0.465	0	Basal cells_CA1 high	CYC1
0	0.738043	1	0.988	0	Basal cells_CA1 high	ND2
0	0.731882	0.465	0.197	0	Basal cells_CA1 high	MT2
0	0.723048	0.947	0.678	0	Basal cells_CA1 high	ETFB
0	0.72045	0.966	0.773	0	Basal cells_CA1 high	ENSOARG00020017129
0	0.719288	0.479	0.138	0	Basal cells_CA1 high	THEM5
0	0.715607	0.797	0.394	0	Basal cells_CA1 high	UQCRC1
0	0.712835	0.956	0.775	0	Basal cells_CA1 high	ATP5PF
0	0.711693	0.837	0.452	0	Basal cells_CA1 high	MDH2
0	0.710728	0.627	0.206	0	Basal cells_CA1 high	HSD17B2
0	0.709671	0.919	0.632	0	Basal cells_CA1 high	PRDX5
0	0.70798	0.639	0.211	0	Basal cells_CA1 high	FBP2
0	0.707559	0.746	0.324	0	Basal cells_CA1 high	TUFM
0	0.707221	0.974	0.76	0	Basal cells_CA1 high	ATP5F1A
0	0.703617	0.981	0.819	0	Basal cells_CA1 high	HSP10
0	0.692317	0.719	0.34	0	Basal cells_CA1 high	ENSOARG00020010443
0	0.687191	0.977	0.82	0	Basal cells_CA1 high	ATP5PD
0	0.686516	0.646	0.243	0	Basal cells_CA1 high	ND6
0	0.677902	0.953	0.566	0	Basal cells_CA1 high	ENSOARG00020010357
0	0.672107	0.793	0.393	0	Basal cells_CA1 high	NDUFV1
0	0.670339	0.892	0.593	0	Basal cells_CA1 high	NDUFAB1
0	0.6687	0.973	0.837	0	Basal cells_CA1 high	ENSOARG00020021822
0	0.661387	0.908	0.47	0	Basal cells_CA1 high	PTGR1
0	0.661338	0.895	0.641	0	Basal cells_CA1 high	NDUFB7
0	0.661081	0.606	0.204	0	Basal cells_CA1 high	IMP4
0	0.65137	0.898	0.602	0	Basal cells_CA1 high	NDUFS8
0	0.649056	0.743	0.343	0	Basal cells_CA1 high	ENSOARG00020007692
0	0.647526	0.895	0.588	0	Basal cells_CA1 high	UQCRFS1
0	0.646494	0.965	0.819	0	Basal cells_CA1 high	ENSOARG00020022141
0	0.646304	0.578	0.183	0	Basal cells_CA1 high	ENSOARG00020019066
0	0.646154	0.841	0.522	0	Basal cells_CA1 high	NDUFS6
0	0.640678	0.523	0.151	0	Basal cells_CA1 high	ABCC3
0	0.638769	0.853	0.387	0	Basal cells_CA1 high	ALDH1A1
0	0.636882	0.967	0.82	0	Basal cells_CA1 high	COX8A
0	0.633025	0.948	0.758	0	Basal cells_CA1 high	ENSOARG00020002539
0	0.613515	1	0.987	0	Basal cells_CA1 high	ATP6
0	0.612922	0.975	0.847	0	Basal cells_CA1 high	ATP5ME
0	0.598502	0.868	0.565	0	Basal cells_CA1 high	FAM162A
0	0.585613	0.905	0.543	0	Basal cells_CA1 high	GPX1
0	0.585346	0.888	0.601	0	Basal cells_CA1 high	ENSOARG00020012172
0	0.58388	0.103	0.024	0	Basal cells_CA1 high	CCL20
0	0.582699	0.837	0.487	0	Basal cells_CA1 high	NDUFV2
0	0.57681	0.81	0.466	0	Basal cells_CA1 high	NDUFS7
0	0.576373	0.569	0.2	0	Basal cells_CA1 high	ME1
0	0.575616	0.56	0.209	0	Basal cells_CA1 high	ACAA2
0	0.573703	0.882	0.576	0	Basal cells_CA1 high	ENSOARG00020013805
0	0.573689	0.574	0.209	0	Basal cells_CA1 high	MAOA
0	0.565524	0.85	0.552	0	Basal cells_CA1 high	NDUFA12
0	0.554212	0.378	0.069	0	Basal cells_CA1 high	PAPSS2
0	0.551814	0.497	0.185	0	Basal cells_CA1 high	PDZK1IP1
0	0.548289	0.939	0.754	0	Basal cells_CA1 high	ATP5IF1
0	0.547126	0.867	0.547	0	Basal cells_CA1 high	ENSOARG00020014986
0	0.54147	0.451	0.11	0	Basal cells_CA1 high	PCK2
0	0.539236	0.982	0.846	0	Basal cells_CA1 high	TXN
0	0.536681	0.849	0.535	0	Basal cells_CA1 high	ENSOARG00020012952
0	0.530679	0.498	0.171	0	Basal cells_CA1 high	AMACR
0	0.528791	0.339	0.064	0	Basal cells_CA1 high	NRG1
0	0.527278	0.344	0.074	0	Basal cells_CA1 high	CES2
0	0.526368	0.571	0.215	0	Basal cells_CA1 high	DECR1
0	0.524647	0.435	0.13	0	Basal cells_CA1 high	ENSOARG00020019805
0	0.522188	0.793	0.452	0	Basal cells_CA1 high	ETFA
0	0.518686	1	0.996	0	Basal cells_CA1 high	ENSOARG00020000005
0	0.516369	0.572	0.232	0	Basal cells_CA1 high	ACAT1
0	0.514062	0.762	0.435	0	Basal cells_CA1 high	ENSOARG00020014432
0	0.504972	0.904	0.671	0	Basal cells_CA1 high	NME2
0	0.5045	0.9	0.681	0	Basal cells_CA1 high	ATP5MD.2
0	0.502766	0.735	0.403	0	Basal cells_CA1 high	MRPL40
0	0.50203	0.678	0.324	0	Basal cells_CA1 high	NDUFA9
0	0.495523	0.386	0.117	0	Basal cells_CA1 high	SLC26A2
0	0.495032	0.539	0.242	0	Basal cells_CA1 high	SERPINB1
0	0.489328	0.604	0.271	0	Basal cells_CA1 high	MRPS25
0	0.488181	0.799	0.499	0	Basal cells_CA1 high	NDUFA7
0	0.487961	0.671	0.33	0	Basal cells_CA1 high	APRT
0	0.487445	0.95	0.742	0	Basal cells_CA1 high	ATP5PO
0	0.487155	0.513	0.186	0	Basal cells_CA1 high	MTCH2
0	0.483682	0.16	0.022	0	Basal cells_CA1 high	ENSOARG00020006194
0	0.480394	0.737	0.403	0	Basal cells_CA1 high	ENSOARG00020012751
0	0.479474	0.494	0.172	0	Basal cells_CA1 high	ALAD
0	0.474032	0.878	0.658	0	Basal cells_CA1 high	DBI
0	0.472082	0.881	0.627	0	Basal cells_CA1 high	ENSOARG00020012190
0	0.470178	0.488	0.174	0	Basal cells_CA1 high	ETFDH
0	0.465169	0.859	0.469	0	Basal cells_CA1 high	CD9
0	0.464639	0.715	0.345	0	Basal cells_CA1 high	ATP1B1
0	0.462012	0.538	0.218	0	Basal cells_CA1 high	ENSOARG00020007668
0	0.460766	0.807	0.499	0	Basal cells_CA1 high	MICOS13
0	0.455699	0.884	0.6	0	Basal cells_CA1 high	ADH5
0	0.452843	0.393	0.153	0	Basal cells_CA1 high	SRM
0	0.449707	0.565	0.247	0	Basal cells_CA1 high	SURF1
0	0.446409	0.85	0.564	0	Basal cells_CA1 high	NDUFB5
0	0.445981	0.898	0.629	0	Basal cells_CA1 high	KRTCAP2
0	0.440153	0.348	0.097	0	Basal cells_CA1 high	ENSOARG00020000906
0	0.440104	0.987	0.795	0	Basal cells_CA1 high	S100A10
0	0.439019	0.33	0.123	0	Basal cells_CA1 high	HSPA6
0	0.435924	0.957	0.788	0	Basal cells_CA1 high	SLC25A3
0	0.433992	0.537	0.228	0	Basal cells_CA1 high	MPST
0	0.433952	0.571	0.249	0	Basal cells_CA1 high	TXN2
0	0.433364	0.444	0.168	0	Basal cells_CA1 high	ENSOARG00020014533
0	0.429251	0.234	0.081	0	Basal cells_CA1 high	ENSOARG00020011601
0	0.423795	0.446	0.201	0	Basal cells_CA1 high	HSPA1A
0	0.422035	0.702	0.369	0	Basal cells_CA1 high	TXNDC17
0	0.418616	0.649	0.336	0	Basal cells_CA1 high	GHITM
0	0.417529	0.311	0.063	0	Basal cells_CA1 high	HMGCS2
0	0.417336	0.987	0.905	0	Basal cells_CA1 high	ENSOARG00020010128
0	0.416124	0.515	0.204	0	Basal cells_CA1 high	RPP21
0	0.415854	0.301	0.057	0	Basal cells_CA1 high	CYP26A1
0	0.409012	0.761	0.458	0	Basal cells_CA1 high	SNRNP25
0	0.406029	0.957	0.69	0	Basal cells_CA1 high	ENSOARG00020018857
0	0.405306	0.706	0.382	0	Basal cells_CA1 high	ALDOA
0	0.401932	0.901	0.674	0	Basal cells_CA1 high	NDUFA2
0	0.39813	0.921	0.701	0	Basal cells_CA1 high	NDUFB10
0	0.397259	0.36	0.114	0	Basal cells_CA1 high	GPT
0	0.396386	0.263	0.062	0	Basal cells_CA1 high	ENSOARG00020006250
0	0.394472	0.573	0.277	0	Basal cells_CA1 high	MRPL34
0	0.393304	0.479	0.195	0	Basal cells_CA1 high	TBRG4
0	0.391802	0.419	0.151	0	Basal cells_CA1 high	AP1M2
0	0.387988	0.343	0.111	0	Basal cells_CA1 high	ENSOARG00020026390
0	0.387817	0.494	0.21	0	Basal cells_CA1 high	LDHA
0	0.38699	0.435	0.158	0	Basal cells_CA1 high	AIFM1
0	0.385331	0.553	0.261	0	Basal cells_CA1 high	ABHD11
0	0.383994	0.505	0.226	0	Basal cells_CA1 high	HINT2
0	0.383961	0.43	0.159	0	Basal cells_CA1 high	ENDOG
0	0.38359	0.469	0.214	0	Basal cells_CA1 high	FERMT1
0	0.382686	0.522	0.223	0	Basal cells_CA1 high	MRPL12
0	0.379314	0.799	0.513	0	Basal cells_CA1 high	MPC2
0	0.379059	1	0.994	0	Basal cells_CA1 high	ENSOARG00020000003
0	0.376272	0.841	0.568	0	Basal cells_CA1 high	ENSOARG00020006995
0	0.372044	0.256	0.055	0	Basal cells_CA1 high	AOX1
0	0.371145	0.786	0.525	0	Basal cells_CA1 high	NDUFB4
0	0.371098	0.693	0.41	0	Basal cells_CA1 high	ENSOARG00020015612
0	0.370007	0.261	0.052	0	Basal cells_CA1 high	IL1R2
0	0.369667	0.517	0.237	0	Basal cells_CA1 high	BPNT1
0	0.368702	0.948	0.641	0	Basal cells_CA1 high	ENSOARG00020018871
0	0.367484	0.442	0.173	0	Basal cells_CA1 high	PCCB
0	0.364705	0.877	0.616	0	Basal cells_CA1 high	SNRPG
0	0.363906	0.614	0.318	0	Basal cells_CA1 high	PHB
0	0.363641	0.551	0.265	0	Basal cells_CA1 high	PLIN2
0	0.363111	0.674	0.372	0	Basal cells_CA1 high	HIGD2A
0	0.361756	0.44	0.179	0	Basal cells_CA1 high	TRAP1
0	0.361023	0.772	0.496	0	Basal cells_CA1 high	NDUFA8
0	0.360984	0.281	0.067	0	Basal cells_CA1 high	AHCYL2
0	0.356101	0.52	0.245	0	Basal cells_CA1 high	MMUT
0	0.355813	0.5	0.215	0	Basal cells_CA1 high	TMEM238
0	0.35407	0.754	0.437	0	Basal cells_CA1 high	FKBP11
0	0.353648	0.814	0.53	0	Basal cells_CA1 high	NDUFS2
0	0.353577	0.753	0.468	0	Basal cells_CA1 high	SUCLG1
0	0.352301	0.315	0.099	0	Basal cells_CA1 high	SLC22A18
0	0.352176	0.404	0.157	0	Basal cells_CA1 high	ENSOARG00020000633
0	0.3506	0.664	0.367	0	Basal cells_CA1 high	ARHGAP10
0	0.349549	0.382	0.162	0	Basal cells_CA1 high	PPARG
0	0.349437	0.97	0.855	0	Basal cells_CA1 high	ENSOARG00020008962
0	0.349019	0.565	0.27	0	Basal cells_CA1 high	MRPL51
0	0.346834	0.753	0.391	0	Basal cells_CA1 high	IDH1
0	0.346828	0.528	0.231	0	Basal cells_CA1 high	HSDL2
0	0.346669	0.507	0.227	0	Basal cells_CA1 high	ENSOARG00020006477
0	0.345675	0.446	0.183	0	Basal cells_CA1 high	PRDX3
0	0.345108	0.525	0.248	0	Basal cells_CA1 high	MRPL50
0	0.34484	0.826	0.542	0	Basal cells_CA1 high	SLIRP
0	0.3437	0.349	0.105	0	Basal cells_CA1 high	TIMM8A
0	0.343428	0.361	0.151	0	Basal cells_CA1 high	GLRX
0	0.342436	0.347	0.137	0	Basal cells_CA1 high	ENSOARG00020022604
0	0.339466	1	0.988	0	Basal cells_CA1 high	ENSOARG00020011816
0	0.339334	0.707	0.406	0	Basal cells_CA1 high	IDH3G
0	0.337181	0.922	0.651	0	Basal cells_CA1 high	ENSOARG00020007966
0	0.336951	0.807	0.565	0	Basal cells_CA1 high	ENSOARG00020003553
0	0.335891	0.899	0.554	0	Basal cells_CA1 high	SYNE2
0	0.335658	0.456	0.211	0	Basal cells_CA1 high	MGST2
0	0.335608	0.429	0.177	0	Basal cells_CA1 high	C1QBP
0	0.334432	0.569	0.292	0	Basal cells_CA1 high	PNKD
0	0.332924	0.597	0.319	0	Basal cells_CA1 high	FKBP4
0	0.332554	0.615	0.308	0	Basal cells_CA1 high	PLTP
0	0.331459	0.436	0.174	0	Basal cells_CA1 high	COQ9
0	0.329025	0.385	0.156	0	Basal cells_CA1 high	MPND
0	0.328719	0.531	0.289	0	Basal cells_CA1 high	ENSOARG00020025903
0	0.324262	0.326	0.119	0	Basal cells_CA1 high	HSPA4L
0	0.321506	0.791	0.411	0	Basal cells_CA1 high	CKB
0	0.31785	0.525	0.261	0	Basal cells_CA1 high	NAXE
0	0.316326	0.828	0.56	0	Basal cells_CA1 high	MRPS26
0	0.316315	0.792	0.527	0	Basal cells_CA1 high	FBL
0	0.31489	0.328	0.107	0	Basal cells_CA1 high	PPA1
0	0.31267	0.875	0.38	0	Basal cells_CA1 high	KRT15
0	0.311676	0.352	0.142	0	Basal cells_CA1 high	TPMT
0	0.310796	0.823	0.593	0	Basal cells_CA1 high	NDUFA11
0	0.310119	0.299	0.101	0	Basal cells_CA1 high	MTARC2
0	0.309354	0.676	0.387	0	Basal cells_CA1 high	NDUFB6
0	0.307266	0.517	0.255	0	Basal cells_CA1 high	TUBA4A
0	0.30712	0.32	0.118	0	Basal cells_CA1 high	TMPRSS11A
0	0.306668	0.861	0.51	0	Basal cells_CA1 high	PLP2
0	0.305637	0.472	0.218	0	Basal cells_CA1 high	MCEE
0	0.305262	0.993	0.933	0	Basal cells_CA1 high	UQCRH
0	0.305126	0.51	0.248	0	Basal cells_CA1 high	FH
0	0.305015	0.617	0.332	0	Basal cells_CA1 high	NDUFA10
0	0.304044	0.976	0.879	0	Basal cells_CA1 high	ENSOARG00020023270
0	0.302471	0.609	0.329	0	Basal cells_CA1 high	NDUFAF3
0	0.29987	0.212	0.061	0	Basal cells_CA1 high	ENSOARG00020008614
0	0.296132	0.517	0.255	0	Basal cells_CA1 high	PHB2
0	0.295544	0.324	0.123	0	Basal cells_CA1 high	AKAP1
0	0.295496	0.443	0.199	0	Basal cells_CA1 high	COQ7
0	0.294978	1	0.981	0	Basal cells_CA1 high	RACK1
0	0.294564	0.487	0.224	0	Basal cells_CA1 high	MRPL38
0	0.294032	0.987	0.865	0	Basal cells_CA1 high	HSPB1
0	0.293764	0.789	0.531	0	Basal cells_CA1 high	NDUFB2
0	0.293754	1	0.983	0	Basal cells_CA1 high	RPL28
0	0.292109	0.997	0.95	0	Basal cells_CA1 high	ND3
0	0.291205	0.475	0.227	0	Basal cells_CA1 high	MRPL37
0	0.290009	0.9	0.652	0	Basal cells_CA1 high	GAPDH
0	0.288705	0.303	0.12	0	Basal cells_CA1 high	ENSOARG00020023753
0	0.288559	0.526	0.258	0	Basal cells_CA1 high	RNASEH2C
0	0.288041	0.472	0.233	0	Basal cells_CA1 high	DTYMK
0	0.287881	0.5	0.247	0	Basal cells_CA1 high	MACROD1
0	0.287873	0.847	0.583	0	Basal cells_CA1 high	CUTA
0	0.287395	0.654	0.327	0	Basal cells_CA1 high	ENSOARG00020017637
0	0.285542	0.4	0.171	0	Basal cells_CA1 high	HSPA9
0	0.284672	0.43	0.183	0	Basal cells_CA1 high	MRPS31
0	0.284669	0.47	0.21	0	Basal cells_CA1 high	PALMD
0	0.284528	0.706	0.434	0	Basal cells_CA1 high	ENSOARG00020026470
0	0.283779	0.672	0.389	0	Basal cells_CA1 high	TKT
0	0.283647	0.408	0.185	0	Basal cells_CA1 high	AACS
0	0.281865	0.848	0.622	0	Basal cells_CA1 high	RANBP1
0	0.281446	0.944	0.806	0	Basal cells_CA1 high	MICOS10
0	0.280864	0.364	0.151	0	Basal cells_CA1 high	ECHDC1
0	0.280522	0.58	0.318	0	Basal cells_CA1 high	MRPL11
0	0.280379	0.626	0.36	0	Basal cells_CA1 high	TMEM208
0	0.280262	0.513	0.256	0	Basal cells_CA1 high	TIMM50
0	0.278642	0.267	0.079	0	Basal cells_CA1 high	ENSOARG00020024560
0	0.277632	0.457	0.216	0	Basal cells_CA1 high	APEH
0	0.276773	0.508	0.257	0	Basal cells_CA1 high	MTX1
0	0.275125	0.314	0.135	0	Basal cells_CA1 high	CST6
0	0.274832	0.224	0.06	0	Basal cells_CA1 high	TNS4
0	0.27442	0.431	0.202	0	Basal cells_CA1 high	LRPPRC
0	0.274043	0.531	0.271	0	Basal cells_CA1 high	MRPS11
0	0.272047	0.537	0.287	0	Basal cells_CA1 high	GSTM3
0	0.271315	0.611	0.345	0	Basal cells_CA1 high	AKR1A1
0	0.271103	0.776	0.52	0	Basal cells_CA1 high	ATP5F1B
0	0.26954	0.56	0.306	0	Basal cells_CA1 high	NHP2
0	0.269235	0.4	0.177	0	Basal cells_CA1 high	MTIF3
0	0.269208	0.351	0.133	0	Basal cells_CA1 high	ADK
0	0.268965	0.754	0.49	0	Basal cells_CA1 high	PCBD2
0	0.268355	0.478	0.236	0	Basal cells_CA1 high	ENSOARG00020008734
0	0.267265	0.49	0.243	0	Basal cells_CA1 high	CCDC58
0	0.267053	0.237	0.101	0	Basal cells_CA1 high	GPX2
0	0.266682	0.526	0.278	0	Basal cells_CA1 high	MRPL55
0	0.266296	0.597	0.271	0	Basal cells_CA1 high	ENSOARG00020024147
0	0.266248	0.414	0.186	0	Basal cells_CA1 high	COMTD1
0	0.265597	0.51	0.262	0	Basal cells_CA1 high	ENSOARG00020003833
0	0.265066	0.19	0.063	0	Basal cells_CA1 high	ENSOARG00020021657
0	0.26241	0.513	0.256	0	Basal cells_CA1 high	MRPS36
0	0.261704	0.589	0.307	0	Basal cells_CA1 high	DSP
0	0.260839	0.428	0.204	0	Basal cells_CA1 high	ENSOARG00020004438
0	0.260718	0.82	0.566	0	Basal cells_CA1 high	NDUFC2
0	0.260458	0.284	0.128	0	Basal cells_CA1 high	ENSOARG00020024927
0	0.259725	0.41	0.189	0	Basal cells_CA1 high	SCO2
0	0.258268	0.37	0.152	0	Basal cells_CA1 high	MRPS35
0	0.257578	0.554	0.307	0	Basal cells_CA1 high	CSKMT
0	0.257567	0.323	0.126	0	Basal cells_CA1 high	NDUFS1
0	0.257385	1	0.988	0	Basal cells_CA1 high	RPS9
0	0.25677	0.854	0.626	0	Basal cells_CA1 high	ENSOARG00020023960
0	0.255139	0.439	0.213	0	Basal cells_CA1 high	ENSOARG00020000539
0	0.254791	0.202	0.058	0	Basal cells_CA1 high	CTSL
0	0.254433	0.51	0.264	0	Basal cells_CA1 high	ZNF593
0	0.254243	0.459	0.223	0	Basal cells_CA1 high	GADD45GIP1
0	0.253963	0.614	0.358	0	Basal cells_CA1 high	ENSOARG00020014726
0	0.250233	0.932	0.731	0	Basal cells_CA1 high	SOD1
7.24304e-235	0.295185	0.167	0.092	1.34779e-230	Basal cells_CA1 high	AREG
0	3.09964	0.989	0.121	0	Basal cells_SELENBP1 high	ENSOARG00020014854
0	2.65755	0.992	0.296	0	Basal cells_SELENBP1 high	SELENBP1
0	2.37209	0.999	0.396	0	Basal cells_SELENBP1 high	TST
0	2.22204	1	0.468	0	Basal cells_SELENBP1 high	KRT17
0	2.03923	0.957	0.177	0	Basal cells_SELENBP1 high	ENSOARG00020014505
0	2.02292	0.773	0.216	0	Basal cells_SELENBP1 high	CCDC80
0	1.94727	0.994	0.382	0	Basal cells_SELENBP1 high	C15orf48
0	1.94036	1	0.986	0	Basal cells_SELENBP1 high	COX1
0	1.72325	0.926	0.283	0	Basal cells_SELENBP1 high	KRT19
0	1.58117	0.999	0.657	0	Basal cells_SELENBP1 high	PRDX6
0	1.58011	0.98	0.298	0	Basal cells_SELENBP1 high	UGT1A1
0	1.55082	0.999	0.78	0	Basal cells_SELENBP1 high	ENSOARG00020011058
0	1.54834	0.988	0.452	0	Basal cells_SELENBP1 high	AHCY
0	1.44298	0.978	0.414	0	Basal cells_SELENBP1 high	SQOR
0	1.41886	0.953	0.367	0	Basal cells_SELENBP1 high	ATP1B1
0	1.41534	0.966	0.448	0	Basal cells_SELENBP1 high	ETHE1
0	1.40925	0.999	0.471	0	Basal cells_SELENBP1 high	ENSOARG00020015582
0	1.3751	0.965	0.368	0	Basal cells_SELENBP1 high	ENSOARG00020007692
0	1.37198	0.997	0.593	0	Basal cells_SELENBP1 high	CHCHD10
0	1.35931	0.984	0.496	0	Basal cells_SELENBP1 high	CD9
0	1.34184	0.994	0.393	0	Basal cells_SELENBP1 high	ENSOARG00020023920
0	1.32732	0.991	0.54	0	Basal cells_SELENBP1 high	ENSOARG00020004948
0	1.24734	0.938	0.384	0	Basal cells_SELENBP1 high	DHRS7
0	1.24455	0.996	0.416	0	Basal cells_SELENBP1 high	ENSOARG00020023904
0	1.19108	0.919	0.338	0	Basal cells_SELENBP1 high	CMBL
0	1.17987	0.812	0.126	0	Basal cells_SELENBP1 high	PCK2
0	1.15618	0.917	0.47	0	Basal cells_SELENBP1 high	ENSOARG00020017413
0	1.13122	0.992	0.595	0	Basal cells_SELENBP1 high	ENSOARG00020010357
0	1.13038	0.978	0.502	0	Basal cells_SELENBP1 high	PTGR1
0	1.12242	0.908	0.272	0	Basal cells_SELENBP1 high	ENSOARG00020014406
0	1.11119	0.977	0.505	0	Basal cells_SELENBP1 high	PDLIM1
0	1.09093	0.974	0.415	0	Basal cells_SELENBP1 high	KRT15
0	1.06479	0.873	0.265	0	Basal cells_SELENBP1 high	PHB2
0	1.05841	0.837	0.221	0	Basal cells_SELENBP1 high	ME1
0	1.05114	0.844	0.315	0	Basal cells_SELENBP1 high	MGST1
0	1.04543	0.935	0.35	0	Basal cells_SELENBP1 high	KRT5
0	1.04156	0.975	0.569	0	Basal cells_SELENBP1 high	GPX1
0	1.03344	0.891	0.382	0	Basal cells_SELENBP1 high	SOD2
0	1.01974	0.539	0.161	0	Basal cells_SELENBP1 high	ENSOARG00020024411
0	1.01399	0.866	0.32	0	Basal cells_SELENBP1 high	ACSF2
0	0.999932	0.981	0.534	0	Basal cells_SELENBP1 high	PLP2
0	0.992939	1	0.982	0	Basal cells_SELENBP1 high	RACK1
0	0.973798	0.999	0.617	0	Basal cells_SELENBP1 high	S100A2
0	0.963366	0.888	0.324	0	Basal cells_SELENBP1 high	PLTP
0	0.957236	0.936	0.362	0	Basal cells_SELENBP1 high	CYSTM1
0	0.956111	0.936	0.379	0	Basal cells_SELENBP1 high	AK2
0	0.955086	0.975	0.62	0	Basal cells_SELENBP1 high	ADH5
0	0.951759	0.997	0.837	0	Basal cells_SELENBP1 high	ND5
0	0.951589	0.886	0.413	0	Basal cells_SELENBP1 high	UACA
0	0.950681	0.911	0.422	0	Basal cells_SELENBP1 high	UQCRC1
0	0.945119	0.899	0.398	0	Basal cells_SELENBP1 high	ENSOARG00020019097
0	0.918138	0.992	0.776	0	Basal cells_SELENBP1 high	ATP5F1A
0	0.904933	0.956	0.462	0	Basal cells_SELENBP1 high	BLVRB
0	0.898765	0.498	0.13	0	Basal cells_SELENBP1 high	ENSOARG00020022244
0	0.873378	0.979	0.665	0	Basal cells_SELENBP1 high	ENSOARG00020007903
0	0.871051	0.694	0.214	0	Basal cells_SELENBP1 high	ENSOARG00020017319
0	0.859767	0.833	0.299	0	Basal cells_SELENBP1 high	ENSOARG00020025903
0	0.837593	0.814	0.235	0	Basal cells_SELENBP1 high	DECR1
0	0.822212	0.759	0.232	0	Basal cells_SELENBP1 high	MAOA
0	0.806787	0.829	0.255	0	Basal cells_SELENBP1 high	ENSOARG00020009302
0	0.805186	0.992	0.723	0	Basal cells_SELENBP1 high	TSPO
0	0.803779	0.949	0.476	0	Basal cells_SELENBP1 high	ENSOARG00020009753
0	0.793898	0.983	0.702	0	Basal cells_SELENBP1 high	COX5A
0	0.786295	0.686	0.175	0	Basal cells_SELENBP1 high	ABCC3
0	0.782413	0.692	0.14	0	Basal cells_SELENBP1 high	ALDH2
0	0.775243	0.753	0.209	0	Basal cells_SELENBP1 high	ENSOARG00020019066
0	0.773858	0.995	0.819	0	Basal cells_SELENBP1 high	MGST3
0	0.771816	0.906	0.48	0	Basal cells_SELENBP1 high	MDH2
0	0.767983	0.978	0.688	0	Basal cells_SELENBP1 high	ENSOARG00020001599
0	0.766855	0.908	0.39	0	Basal cells_SELENBP1 high	ENSOARG00020006784
0	0.763752	0.896	0.492	0	Basal cells_SELENBP1 high	CYC1
0	0.761444	0.794	0.24	0	Basal cells_SELENBP1 high	FBP2
0	0.752767	1	0.967	0	Basal cells_SELENBP1 high	ENSOARG00020019356
0	0.745521	0.986	0.669	0	Basal cells_SELENBP1 high	GAPDH
0	0.736517	0.873	0.403	0	Basal cells_SELENBP1 high	ALDOA
0	0.736217	0.933	0.587	0	Basal cells_SELENBP1 high	FAM162A
0	0.732425	0.857	0.31	0	Basal cells_SELENBP1 high	DHRS1
0	0.727235	0.729	0.231	0	Basal cells_SELENBP1 high	MCRIP2
0	0.726555	0.949	0.551	0	Basal cells_SELENBP1 high	ATP5F1D
0	0.715321	0.854	0.353	0	Basal cells_SELENBP1 high	TUFM
0	0.714531	0.493	0.07	0	Basal cells_SELENBP1 high	CYP26A1
0	0.707455	0.902	0.452	0	Basal cells_SELENBP1 high	UQCRC2
0	0.706041	0.912	0.415	0	Basal cells_SELENBP1 high	IDH1
0	0.700708	0.965	0.579	0	Basal cells_SELENBP1 high	SYNE2
0	0.690006	0.975	0.649	0	Basal cells_SELENBP1 high	PCBP2
0	0.682874	0.797	0.258	0	Basal cells_SELENBP1 high	MACROD1
0	0.682451	0.777	0.245	0	Basal cells_SELENBP1 high	MPST
0	0.679141	0.529	0.136	0	Basal cells_SELENBP1 high	ENSOARG00020014594
0	0.67886	0.986	0.745	0	Basal cells_SELENBP1 high	SOD1
0	0.669617	0.992	0.736	0	Basal cells_SELENBP1 high	ENSOARG00020022770
0	0.66374	0.788	0.268	0	Basal cells_SELENBP1 high	TXN2
0	0.656291	0.693	0.165	0	Basal cells_SELENBP1 high	MPND
0	0.655027	0.612	0.149	0	Basal cells_SELENBP1 high	ENSOARG00020019805
0	0.642736	0.908	0.536	0	Basal cells_SELENBP1 high	ATP5F1B
0	0.640257	0.429	0.099	0	Basal cells_SELENBP1 high	ELF3
0	0.640192	0.768	0.27	0	Basal cells_SELENBP1 high	SOX2
0	0.637925	0.732	0.222	0	Basal cells_SELENBP1 high	MGST2
0	0.637527	0.868	0.362	0	Basal cells_SELENBP1 high	SFN
0	0.636475	0.998	0.903	0	Basal cells_SELENBP1 high	ENSOARG00020013487
0	0.631564	1	0.966	0	Basal cells_SELENBP1 high	ENSOARG00020009956
0	0.6312	0.625	0.188	0	Basal cells_SELENBP1 high	S100A8
0	0.616497	0.65	0.172	0	Basal cells_SELENBP1 high	PPARG
0	0.611427	0.885	0.404	0	Basal cells_SELENBP1 high	TKT
0	0.608811	0.809	0.296	0	Basal cells_SELENBP1 high	ECM1
0	0.608264	0.999	0.953	0	Basal cells_SELENBP1 high	ENSOARG00020004797
0	0.60565	0.449	0.092	0	Basal cells_SELENBP1 high	CES2
0	0.605091	0.73	0.236	0	Basal cells_SELENBP1 high	HSD17B2
0	0.604511	0.627	0.161	0	Basal cells_SELENBP1 high	CDH13
0	0.603336	0.475	0.045	0	Basal cells_SELENBP1 high	ENSOARG00020008074
0	0.600081	0.898	0.475	0	Basal cells_SELENBP1 high	ETFA
0	0.594706	0.933	0.512	0	Basal cells_SELENBP1 high	NDUFV2
0	0.594388	0.885	0.433	0	Basal cells_SELENBP1 high	ENSOARG00020020724
0	0.5936	0.99	0.788	0	Basal cells_SELENBP1 high	RPL17.2
0	0.586869	0.95	0.645	0	Basal cells_SELENBP1 high	ENSOARG00020012190
0	0.583397	0.998	0.921	0	Basal cells_SELENBP1 high	ENSOARG00020009052
0	0.583212	0.88	0.388	0	Basal cells_SELENBP1 high	NOP53
0	0.583008	0.675	0.193	0	Basal cells_SELENBP1 high	ETFDH
0	0.580092	0.84	0.386	0	Basal cells_SELENBP1 high	ENSOARG00020019119
0	0.579637	0.709	0.27	0	Basal cells_SELENBP1 high	TUBA4A
0	0.578211	0.998	0.898	0	Basal cells_SELENBP1 high	RPL4
0	0.574021	0.553	0.109	0	Basal cells_SELENBP1 high	SLC22A18
0	0.573628	0.689	0.232	0	Basal cells_SELENBP1 high	MCEE
0	0.572697	0.998	0.893	0	Basal cells_SELENBP1 high	RPS2
0	0.571419	0.936	0.611	0	Basal cells_SELENBP1 high	UQCRFS1
0	0.569341	1	0.977	0	Basal cells_SELENBP1 high	ENSOARG00020012848
0	0.566847	1	0.993	0	Basal cells_SELENBP1 high	TPT1
0	0.560106	0.958	0.475	0	Basal cells_SELENBP1 high	B2M
0	0.557795	0.536	0.187	0	Basal cells_SELENBP1 high	ENSOARG00020014533
0	0.555086	0.738	0.267	0	Basal cells_SELENBP1 high	SURF1
0	0.552595	0.961	0.662	0	Basal cells_SELENBP1 high	MDH1
0	0.551033	0.912	0.489	0	Basal cells_SELENBP1 high	GAMT
0	0.548172	0.886	0.513	0	Basal cells_SELENBP1 high	ENSOARG00020015039
0	0.547419	0.992	0.857	0	Basal cells_SELENBP1 high	TXN
0	0.546511	0.926	0.531	0	Basal cells_SELENBP1 high	MPC2
0	0.545586	0.888	0.486	0	Basal cells_SELENBP1 high	SUCLG1
0	0.545088	0.904	0.438	0	Basal cells_SELENBP1 high	CKB
0	0.543065	0.709	0.24	0	Basal cells_SELENBP1 high	MRPL37
0	0.542533	0.545	0.091	0	Basal cells_SELENBP1 high	ITGB4
0	0.539358	0.836	0.39	0	Basal cells_SELENBP1 high	HIGD2A
0	0.539065	0.659	0.192	0	Basal cells_SELENBP1 high	AMACR
0	0.533548	1	0.993	0	Basal cells_SELENBP1 high	RPS11
0	0.532976	0.7	0.253	0	Basal cells_SELENBP1 high	BPNT1
0	0.532773	0.558	0.127	0	Basal cells_SELENBP1 high	GPT
0	0.530695	0.708	0.214	0	Basal cells_SELENBP1 high	ENSOARG00020018183
0	0.52064	0.945	0.569	0	Basal cells_SELENBP1 high	ENSOARG00020014986
0	0.520405	0.664	0.192	0	Basal cells_SELENBP1 high	ALAD
0	0.519165	0.981	0.757	0	Basal cells_SELENBP1 high	ATP5PO
0	0.518977	0.703	0.24	0	Basal cells_SELENBP1 high	PHGDH
0	0.518534	0.761	0.271	0	Basal cells_SELENBP1 high	MVB12A
0	0.51809	0.803	0.321	0	Basal cells_SELENBP1 high	SAMM50
0	0.517532	0.653	0.18	0	Basal cells_SELENBP1 high	ENSOARG00020018313
0	0.516457	0.874	0.32	0	Basal cells_SELENBP1 high	CRIP2
0	0.516132	0.999	0.925	0	Basal cells_SELENBP1 high	EEF1G
0	0.512985	0.72	0.254	0	Basal cells_SELENBP1 high	ACAT1
0	0.506879	0.976	0.698	0	Basal cells_SELENBP1 high	ETFB
0	0.502553	0.948	0.598	0	Basal cells_SELENBP1 high	ENSOARG00020013805
0	0.502093	0.619	0.154	0	Basal cells_SELENBP1 high	DTX2
0	0.49803	0.958	0.653	0	Basal cells_SELENBP1 high	PRDX5
0	0.497887	0.765	0.298	0	Basal cells_SELENBP1 high	PTPN13
0	0.497295	0.754	0.292	0	Basal cells_SELENBP1 high	MRPS25
0	0.494852	0.321	0.025	0	Basal cells_SELENBP1 high	ENSOARG00020006959
0	0.493003	0.833	0.353	0	Basal cells_SELENBP1 high	ENSOARG00020026385
0	0.489451	0.712	0.276	0	Basal cells_SELENBP1 high	CMC1
0	0.488712	0.985	0.739	0	Basal cells_SELENBP1 high	KARS1
0	0.486393	0.554	0.127	0	Basal cells_SELENBP1 high	ENSOARG00020023753
0	0.482673	0.654	0.276	0	Basal cells_SELENBP1 high	SLC16A1
0	0.48121	0.63	0.189	0	Basal cells_SELENBP1 high	PCCB
0	0.477113	1	0.984	0	Basal cells_SELENBP1 high	RPSA
0	0.474434	1	0.991	0	Basal cells_SELENBP1 high	RPS5
0	0.473877	0.826	0.356	0	Basal cells_SELENBP1 high	CLCA2
0	0.471878	0.907	0.564	0	Basal cells_SELENBP1 high	ATP5F1C
0	0.470457	0.78	0.361	0	Basal cells_SELENBP1 high	ENSOARG00020017987
0	0.470384	0.583	0.136	0	Basal cells_SELENBP1 high	PHYH
0	0.469864	0.86	0.442	0	Basal cells_SELENBP1 high	VDAC2
0	0.467718	0.676	0.224	0	Basal cells_SELENBP1 high	RPP21
0	0.46729	0.964	0.65	0	Basal cells_SELENBP1 high	EIF3F
0	0.464094	0.51	0.106	0	Basal cells_SELENBP1 high	ENSOARG00020019761
0	0.46348	0.998	0.889	0	Basal cells_SELENBP1 high	ATP5MC2
0	0.458897	0.85	0.41	0	Basal cells_SELENBP1 high	NAA20
0	0.456534	0.917	0.549	0	Basal cells_SELENBP1 high	NDUFS2
0	0.456473	0.673	0.233	0	Basal cells_SELENBP1 high	GRTP1
0	0.456393	0.687	0.242	0	Basal cells_SELENBP1 high	MRPL12
0	0.454977	1	0.991	0	Basal cells_SELENBP1 high	RPLP0
0	0.452416	0.992	0.873	0	Basal cells_SELENBP1 high	ATP5MC3
0	0.45205	0.703	0.262	0	Basal cells_SELENBP1 high	FH
0	0.450149	0.842	0.422	0	Basal cells_SELENBP1 high	NDUFV1
0	0.446386	0.459	0.079	0	Basal cells_SELENBP1 high	SERPINB8
0	0.446242	0.983	0.395	0	Basal cells_SELENBP1 high	CA1
0	0.444932	0.988	0.835	0	Basal cells_SELENBP1 high	ENSOARG00020016302
0	0.440086	0.905	0.502	0	Basal cells_SELENBP1 high	MRPL14
0	0.439852	0.78	0.339	0	Basal cells_SELENBP1 high	ENSOARG00020009357
0	0.439661	0.988	0.782	0	Basal cells_SELENBP1 high	ITM2B
0	0.435479	0.844	0.385	0	Basal cells_SELENBP1 high	ENSOARG00020013570
0	0.43454	0.976	0.691	0	Basal cells_SELENBP1 high	EIF3H
0	0.434446	0.673	0.28	0	Basal cells_SELENBP1 high	ABHD11
0	0.432775	0.593	0.17	0	Basal cells_SELENBP1 high	ENSOARG00020000633
0	0.43247	0.688	0.261	0	Basal cells_SELENBP1 high	MMUT
0	0.429619	0.693	0.236	0	Basal cells_SELENBP1 high	ENSOARG00020022447
0	0.426626	0.841	0.425	0	Basal cells_SELENBP1 high	IDH3G
0	0.424475	0.296	0.077	0	Basal cells_SELENBP1 high	ENSOARG00020006250
0	0.422642	0.556	0.135	0	Basal cells_SELENBP1 high	PECR
0	0.422183	0.723	0.309	0	Basal cells_SELENBP1 high	PNKD
0	0.421227	0.455	0.061	0	Basal cells_SELENBP1 high	PYGB
0	0.420317	0.999	0.95	0	Basal cells_SELENBP1 high	COX4I1
0	0.419582	0.523	0.127	0	Basal cells_SELENBP1 high	ENSOARG00020016651
0	0.419496	0.572	0.168	0	Basal cells_SELENBP1 high	AP1M2
0	0.41718	0.849	0.425	0	Basal cells_SELENBP1 high	DST
0	0.414841	0.997	0.945	0	Basal cells_SELENBP1 high	ND1
0	0.412429	0.972	0.73	0	Basal cells_SELENBP1 high	COX6B1
0	0.411888	0.64	0.256	0	Basal cells_SELENBP1 high	RFC4
0	0.411546	0.34	0.09	0	Basal cells_SELENBP1 high	ENSOARG00020011601
0	0.41132	0.55	0.154	0	Basal cells_SELENBP1 high	MECOM
0	0.405239	0.997	0.726	0	Basal cells_SELENBP1 high	B2M.1
0	0.403252	0.572	0.12	0	Basal cells_SELENBP1 high	ENSOARG00020025249
0	0.402985	0.65	0.229	0	Basal cells_SELENBP1 high	APEH
0	0.400966	0.422	0.054	0	Basal cells_SELENBP1 high	EPHX1
0	0.400336	0.681	0.275	0	Basal cells_SELENBP1 high	RNASEH2C
0	0.398993	0.588	0.176	0	Basal cells_SELENBP1 high	HS3ST6
0	0.398592	1	0.998	0	Basal cells_SELENBP1 high	ENSOARG00020020554
0	0.397619	0.768	0.357	0	Basal cells_SELENBP1 high	GHITM
0	0.397562	0.877	0.423	0	Basal cells_SELENBP1 high	ALDH1A1
0	0.396958	0.6	0.198	0	Basal cells_SELENBP1 high	H2AFJ
0	0.396843	0.673	0.239	0	Basal cells_SELENBP1 high	ENSOARG00020007668
0	0.395247	0.654	0.227	0	Basal cells_SELENBP1 high	LONP1
0	0.394568	0.584	0.153	0	Basal cells_SELENBP1 high	C1R
0	0.390261	0.738	0.327	0	Basal cells_SELENBP1 high	COX11
0	0.389974	0.437	0.065	0	Basal cells_SELENBP1 high	ACSL5
0	0.389823	0.94	0.601	0	Basal cells_SELENBP1 high	CUTA
0	0.388745	0.681	0.242	0	Basal cells_SELENBP1 high	HINT2
0	0.388451	0.6	0.209	0	Basal cells_SELENBP1 high	MTCH2
0	0.383036	0.66	0.234	0	Basal cells_SELENBP1 high	ENSOARG00020015070
0	0.382377	0.913	0.544	0	Basal cells_SELENBP1 high	EIF4B
0	0.381942	1	0.989	0	Basal cells_SELENBP1 high	RPL8
0	0.381552	0.83	0.47	0	Basal cells_SELENBP1 high	CSRP2
0	0.380071	0.172	0.033	0	Basal cells_SELENBP1 high	ENSOARG00020006194
0	0.377522	0.999	0.954	0	Basal cells_SELENBP1 high	ENSOARG00020008122
0	0.377205	0.504	0.129	0	Basal cells_SELENBP1 high	ELMO3
0	0.373092	0.596	0.207	0	Basal cells_SELENBP1 high	TSFM
0	0.37189	0.453	0.09	0	Basal cells_SELENBP1 high	NUDT8
0	0.370769	0.362	0.041	0	Basal cells_SELENBP1 high	MOCS1
0	0.36752	0.384	0.093	0	Basal cells_SELENBP1 high	PAPSS2
0	0.366799	0.69	0.276	0	Basal cells_SELENBP1 high	NAXE
0	0.362575	0.924	0.581	0	Basal cells_SELENBP1 high	ENSOARG00020013424
0	0.361477	0.442	0.133	0	Basal cells_SELENBP1 high	MET
0	0.359169	0.605	0.218	0	Basal cells_SELENBP1 high	LPAR6
0	0.357784	0.513	0.121	0	Basal cells_SELENBP1 high	LY96
0	0.356264	0.765	0.349	0	Basal cells_SELENBP1 high	NDUFA9
0	0.356252	0.38	0.057	0	Basal cells_SELENBP1 high	ENSOARG00020019583
0	0.354522	0.958	0.648	0	Basal cells_SELENBP1 high	KRTCAP2
0	0.35451	0.904	0.557	0	Basal cells_SELENBP1 high	ENSOARG00020012952
0	0.353982	0.748	0.354	0	Basal cells_SELENBP1 high	APRT
0	0.352351	0.491	0.118	0	Basal cells_SELENBP1 high	TAP2
0	0.349222	0.983	0.8	0	Basal cells_SELENBP1 high	SLC25A3
0	0.34893	0.305	0.07	0	Basal cells_SELENBP1 high	ENSOARG00020008614
0	0.34834	0.463	0.142	0	Basal cells_SELENBP1 high	IRX3
0	0.348154	0.719	0.286	0	Basal cells_SELENBP1 high	ENSOARG00020000678
0	0.348072	0.754	0.338	0	Basal cells_SELENBP1 high	TECR
0	0.346115	0.324	0.065	0	Basal cells_SELENBP1 high	CTSL
0	0.345453	0.569	0.125	0	Basal cells_SELENBP1 high	PSMB8
0	0.342476	1	0.98	0	Basal cells_SELENBP1 high	ENSOARG00020010263
0	0.3423	0.999	0.97	0	Basal cells_SELENBP1 high	ENSOARG00020012335
0	0.339413	0.925	0.584	0	Basal cells_SELENBP1 high	NDUFB5
0	0.338863	0.739	0.325	0	Basal cells_SELENBP1 high	PGD
0	0.333999	0.348	0.054	0	Basal cells_SELENBP1 high	MMP9
0	0.332791	1	0.98	0	Basal cells_SELENBP1 high	RPL3
0	0.330755	0.477	0.125	0	Basal cells_SELENBP1 high	EIF6
0	0.329986	0.463	0.118	0	Basal cells_SELENBP1 high	ABCB6
0	0.328989	0.463	0.141	0	Basal cells_SELENBP1 high	DBP
0	0.328601	1	0.989	0	Basal cells_SELENBP1 high	RPS9
0	0.327568	0.5	0.146	0	Basal cells_SELENBP1 high	SERINC2
0	0.325819	0.585	0.209	0	Basal cells_SELENBP1 high	SLC3A2
0	0.324685	0.922	0.585	0	Basal cells_SELENBP1 high	ENSOARG00020005655
0	0.323414	0.563	0.201	0	Basal cells_SELENBP1 high	NMRAL1
0	0.323279	0.646	0.249	0	Basal cells_SELENBP1 high	HSD17B8
0	0.320363	0.514	0.162	0	Basal cells_SELENBP1 high	RAB25
0	0.319715	0.688	0.318	0	Basal cells_SELENBP1 high	LSM4
0	0.317116	0.636	0.24	0	Basal cells_SELENBP1 high	MRPL38
0	0.31611	0.468	0.12	0	Basal cells_SELENBP1 high	PPA1
0	0.316069	0.363	0.078	0	Basal cells_SELENBP1 high	NAT10
0	0.315037	0.397	0.105	0	Basal cells_SELENBP1 high	ENSOARG00020012622
0	0.313223	0.998	0.925	0	Basal cells_SELENBP1 high	ENSOARG00020017190
0	0.312681	0.43	0.114	0	Basal cells_SELENBP1 high	ENSOARG00020000906
0	0.311996	1	0.982	0	Basal cells_SELENBP1 high	ENSOARG00020022050
0	0.310832	0.614	0.247	0	Basal cells_SELENBP1 high	ENSOARG00020010475
0	0.310201	0.612	0.234	0	Basal cells_SELENBP1 high	TMEM238
0	0.310117	0.577	0.231	0	Basal cells_SELENBP1 high	FERMT1
0	0.309676	0.85	0.456	0	Basal cells_SELENBP1 high	ENSOARG00020024732
0	0.309107	0.501	0.148	0	Basal cells_SELENBP1 high	TMC6
0	0.309024	0.492	0.147	0	Basal cells_SELENBP1 high	PLPP2
0	0.309004	0.462	0.116	0	Basal cells_SELENBP1 high	ACAD8
0	0.30856	0.604	0.189	0	Basal cells_SELENBP1 high	HDAC5
0	0.308539	0.561	0.195	0	Basal cells_SELENBP1 high	TRAP1
0	0.306773	0.538	0.166	0	Basal cells_SELENBP1 high	NAPRT
0	0.306096	0.999	0.938	0	Basal cells_SELENBP1 high	ENSOARG00020019322
0	0.305372	0.806	0.391	0	Basal cells_SELENBP1 high	ENSOARG00020023861
0	0.304335	0.319	0.037	0	Basal cells_SELENBP1 high	KRT79
0	0.303262	0.727	0.318	0	Basal cells_SELENBP1 high	MMADHC
0	0.302668	0.424	0.102	0	Basal cells_SELENBP1 high	MTHFD1
0	0.302235	0.335	0.075	0	Basal cells_SELENBP1 high	MACC1
0	0.300428	1	0.989	0	Basal cells_SELENBP1 high	ENSOARG00020002748
0	0.297364	0.697	0.296	0	Basal cells_SELENBP1 high	ANXA2
0	0.296148	1	0.986	0	Basal cells_SELENBP1 high	ENSOARG00020023953
0	0.295821	0.559	0.199	0	Basal cells_SELENBP1 high	COMTD1
0	0.29577	0.84	0.452	0	Basal cells_SELENBP1 high	ENSOARG00020026470
0	0.295223	1	0.987	0	Basal cells_SELENBP1 high	ENSOARG00020018336
0	0.294503	0.414	0.082	0	Basal cells_SELENBP1 high	NPDC1
0	0.294269	1	0.992	0	Basal cells_SELENBP1 high	UBA52
0	0.291897	0.608	0.209	0	Basal cells_SELENBP1 high	ENSOARG00020015171
0	0.291378	0.809	0.427	0	Basal cells_SELENBP1 high	ENSOARG00020012751
0	0.291143	0.586	0.205	0	Basal cells_SELENBP1 high	PRR13
0	0.290767	0.601	0.22	0	Basal cells_SELENBP1 high	METTL26
0	0.290276	0.795	0.392	0	Basal cells_SELENBP1 high	ENSOARG00020006176
0	0.289877	0.768	0.361	0	Basal cells_SELENBP1 high	AKR1A1
0	0.289036	0.466	0.151	0	Basal cells_SELENBP1 high	MAPK13
0	0.287775	0.489	0.145	0	Basal cells_SELENBP1 high	IDH3B
0	0.286707	0.699	0.322	0	Basal cells_SELENBP1 high	ENSOARG00020010802
0	0.286698	0.302	0.083	0	Basal cells_SELENBP1 high	MT1C
0	0.286073	0.59	0.216	0	Basal cells_SELENBP1 high	UBE2Q1
0	0.28568	0.53	0.19	0	Basal cells_SELENBP1 high	FABP4
0	0.284491	0.733	0.351	0	Basal cells_SELENBP1 high	NDUFA10
0	0.282979	0.574	0.222	0	Basal cells_SELENBP1 high	S100A12
0	0.28289	0.698	0.275	0	Basal cells_SELENBP1 high	ENSOARG00020013368
0	0.281765	1	0.985	0	Basal cells_SELENBP1 high	RPS16
0	0.281059	1	0.984	0	Basal cells_SELENBP1 high	RPL29
0	0.280351	0.448	0.115	0	Basal cells_SELENBP1 high	ZNF277
0	0.279725	0.716	0.326	0	Basal cells_SELENBP1 high	MRPL39
0	0.279315	0.368	0.075	0	Basal cells_SELENBP1 high	COQ6
0	0.278499	0.46	0.149	0	Basal cells_SELENBP1 high	JAG2
0	0.277873	1	0.986	0	Basal cells_SELENBP1 high	RPL19
0	0.276126	0.318	0.045	0	Basal cells_SELENBP1 high	RIPK1
0	0.274038	0.535	0.192	0	Basal cells_SELENBP1 high	COQ9
0	0.2739	0.61	0.235	0	Basal cells_SELENBP1 high	IMP4
0	0.27388	0.571	0.215	0	Basal cells_SELENBP1 high	TBRG4
0	0.273543	0.543	0.192	0	Basal cells_SELENBP1 high	ACADVL
0	0.272805	0.346	0.081	0	Basal cells_SELENBP1 high	HMGCS2
0	0.271639	0.579	0.215	0	Basal cells_SELENBP1 high	LTA4H
0	0.269515	0.324	0.066	0	Basal cells_SELENBP1 high	IL1R2
0	0.269507	0.634	0.266	0	Basal cells_SELENBP1 high	THYN1
0	0.266414	0.71	0.293	0	Basal cells_SELENBP1 high	ENSOARG00020024147
0	0.265698	0.503	0.162	0	Basal cells_SELENBP1 high	MRPL2
0	0.264571	0.528	0.186	0	Basal cells_SELENBP1 high	AFG3L2
0	0.263687	0.411	0.127	0	Basal cells_SELENBP1 high	RNASEH2A
0	0.262189	0.608	0.218	0	Basal cells_SELENBP1 high	SUMO1
0	0.262004	0.36	0.088	0	Basal cells_SELENBP1 high	PKP3
0	0.261447	0.492	0.141	0	Basal cells_SELENBP1 high	MVP
0	0.260491	0.557	0.217	0	Basal cells_SELENBP1 high	ENSOARG00020004438
0	0.259619	0.802	0.425	0	Basal cells_SELENBP1 high	CCT3
0	0.259215	0.525	0.179	0	Basal cells_SELENBP1 high	TAPBP
0	0.258961	0.637	0.266	0	Basal cells_SELENBP1 high	ENSOARG00020014618
0	0.258901	0.718	0.325	0	Basal cells_SELENBP1 high	DSP
0	0.255503	0.553	0.207	0	Basal cells_SELENBP1 high	ENSOARG00020025623
0	0.255268	0.612	0.249	0	Basal cells_SELENBP1 high	COA5
0	0.254315	0.404	0.099	0	Basal cells_SELENBP1 high	SLC25A11
0	0.253945	0.341	0.07	0	Basal cells_SELENBP1 high	BRMS1
0	0.253563	0.638	0.249	0	Basal cells_SELENBP1 high	TPRG1L
0	0.251729	0.401	0.167	0	Basal cells_SELENBP1 high	THEM5
0	0.251365	0.356	0.073	0	Basal cells_SELENBP1 high	NFS1
5.83548e-305	0.592999	0.65	0.361	1.08587e-300	Basal cells_SELENBP1 high	ENSOARG00020014591
1.00403e-302	0.263629	1	0.985	1.86831e-298	Basal cells_SELENBP1 high	RPL28
1.99001e-302	0.268391	0.855	0.479	3.70301e-298	Basal cells_SELENBP1 high	SNRNP25
2.82144e-296	0.39662	0.997	0.924	5.25013e-292	Basal cells_SELENBP1 high	ENSOARG00020007547
2.96502e-280	0.288792	0.957	0.672	5.5173e-276	Basal cells_SELENBP1 high	ATP6V0E1
1.38897e-262	0.295253	0.989	0.832	2.5846e-258	Basal cells_SELENBP1 high	ATP5PD
1.68902e-260	0.266734	0.842	0.508	3.14292e-256	Basal cells_SELENBP1 high	PCBD2
9.66144e-260	0.296474	0.978	0.785	1.7978e-255	Basal cells_SELENBP1 high	PRDX2
6.88383e-242	0.255977	0.95	0.661	1.28094e-237	Basal cells_SELENBP1 high	TCP1
3.5092e-235	0.267974	0.987	0.826	6.52993e-231	Basal cells_SELENBP1 high	RPL27
4.67086e-230	0.476864	0.724	0.439	8.69154e-226	Basal cells_SELENBP1 high	DNAJB1
1.1017e-209	0.264382	0.995	0.809	2.05004e-205	Basal cells_SELENBP1 high	S100A10
7.95543e-198	0.275948	0.791	0.516	1.48035e-193	Basal cells_SELENBP1 high	CYCS
5.4732e-184	0.320019	0.972	0.788	1.01845e-179	Basal cells_SELENBP1 high	ENSOARG00020017129
2.75286e-25	0.320185	0.144	0.099	5.12252e-21	Basal cells_SELENBP1 high	AREG
2.03926e-13	0.289379	0.971	0.883	3.79466e-09	Basal cells_SELENBP1 high	HSPA8
0	2.10689	0.968	0.539	0	Spinous cells_AGR2 high	IGFBP2
0	2.01008	0.889	0.29	0	Spinous cells_AGR2 high	KRT19
0	1.99833	0.929	0.198	0	Spinous cells_AGR2 high	CD24
0	1.91394	0.892	0.182	0	Spinous cells_AGR2 high	KRT7
0	1.75761	0.971	0.523	0	Spinous cells_AGR2 high	IGFBP6
0	1.51702	0.523	0.06	0	Spinous cells_AGR2 high	WFDC2
0	1.48574	0.753	0.136	0	Spinous cells_AGR2 high	KRT18
0	1.1788	0.733	0.289	0	Spinous cells_AGR2 high	S100A4
0	1.146	0.786	0.327	0	Spinous cells_AGR2 high	DSP
0	1.12603	0.655	0.149	0	Spinous cells_AGR2 high	DSG2
0	1.06351	0.462	0.106	0	Spinous cells_AGR2 high	TFF3
0	1.05882	0.623	0.149	0	Spinous cells_AGR2 high	EPCAM
0	1.0562	0.904	0.512	0	Spinous cells_AGR2 high	CLIC1
0	1.05446	0.616	0.099	0	Spinous cells_AGR2 high	CLDN7
0	0.973348	0.396	0.018	0	Spinous cells_AGR2 high	AGR2
0	0.961355	0.747	0.275	0	Spinous cells_AGR2 high	SOX2
0	0.953104	0.98	0.719	0	Spinous cells_AGR2 high	ENSOARG00020003728
0	0.948588	0.823	0.388	0	Spinous cells_AGR2 high	ISYNA1
0	0.908827	0.938	0.542	0	Spinous cells_AGR2 high	ENSOARG00020017201
0	0.869725	0.91	0.422	0	Spinous cells_AGR2 high	KRT15
0	0.8658	0.456	0.04	0	Spinous cells_AGR2 high	KRT8
0	0.811511	0.776	0.352	0	Spinous cells_AGR2 high	ENSOARG00020017637
0	0.803986	0.338	0.116	0	Spinous cells_AGR2 high	ENSOARG00020014802
0	0.803262	0.323	0.025	0	Spinous cells_AGR2 high	FABP3
0	0.790876	0.999	0.621	0	Spinous cells_AGR2 high	S100A2
0	0.782752	0.709	0.213	0	Spinous cells_AGR2 high	PDLIM4
0	0.776149	0.604	0.166	0	Spinous cells_AGR2 high	CADM1
0	0.769373	0.829	0.424	0	Spinous cells_AGR2 high	SSBP4
0	0.76064	0.9	0.572	0	Spinous cells_AGR2 high	S100A11
0	0.745725	0.999	0.986	0	Spinous cells_AGR2 high	RPS20
0	0.726934	0.998	0.956	0	Spinous cells_AGR2 high	ENSOARG00020004826
0	0.724076	0.89	0.556	0	Spinous cells_AGR2 high	ENSOARG00020007111
0	0.722292	0.999	0.982	0	Spinous cells_AGR2 high	ENSOARG00020013105
0	0.713864	1	0.984	0	Spinous cells_AGR2 high	RPSA
0	0.713531	0.999	0.987	0	Spinous cells_AGR2 high	RPS10
0	0.711944	1	0.98	0	Spinous cells_AGR2 high	ENSOARG00020016079
0	0.709298	0.906	0.508	0	Spinous cells_AGR2 high	PTGR1
0	0.697616	0.998	0.954	0	Spinous cells_AGR2 high	ENSOARG00020004797
0	0.69311	1	0.993	0	Spinous cells_AGR2 high	ENSOARG00020013429
0	0.690958	0.698	0.254	0	Spinous cells_AGR2 high	C4orf48
0	0.686306	0.918	0.548	0	Spinous cells_AGR2 high	S100A13
0	0.681289	1	0.977	0	Spinous cells_AGR2 high	RPL36
0	0.675728	0.999	0.975	0	Spinous cells_AGR2 high	RPL22
0	0.671768	0.997	0.91	0	Spinous cells_AGR2 high	EEF1D
0	0.671287	0.947	0.668	0	Spinous cells_AGR2 high	ENSOARG00020007903
0	0.668262	0.999	0.939	0	Spinous cells_AGR2 high	ENSOARG00020019322
0	0.661759	0.999	0.995	0	Spinous cells_AGR2 high	RPS18
0	0.646848	0.999	0.989	0	Spinous cells_AGR2 high	ENSOARG00020002748
0	0.645534	0.999	0.979	0	Spinous cells_AGR2 high	ENSOARG00020001330
0	0.642854	1	0.992	0	Spinous cells_AGR2 high	RPL37
0	0.641027	1	0.98	0	Spinous cells_AGR2 high	RPL3
0	0.638989	1	0.991	0	Spinous cells_AGR2 high	RPL7A
0	0.637797	0.992	0.894	0	Spinous cells_AGR2 high	RPS2
0	0.636341	0.934	0.684	0	Spinous cells_AGR2 high	ENSOARG00020025507
0	0.633311	0.998	0.955	0	Spinous cells_AGR2 high	RPS6
0	0.632106	1	0.997	0	Spinous cells_AGR2 high	RPLP1
0	0.625867	0.679	0.28	0	Spinous cells_AGR2 high	NUDT14
0	0.620792	0.992	0.871	0	Spinous cells_AGR2 high	SSR4
0	0.619489	0.714	0.314	0	Spinous cells_AGR2 high	CHD3
0	0.618369	0.939	0.539	0	Spinous cells_AGR2 high	ENSOARG00020017172
0	0.617623	1	0.995	0	Spinous cells_AGR2 high	RPL32
0	0.600664	1	0.995	0	Spinous cells_AGR2 high	ENSOARG00020004572
0	0.587886	1	0.997	0	Spinous cells_AGR2 high	RPS8
0	0.586926	0.737	0.397	0	Spinous cells_AGR2 high	ENSOARG00020006176
0	0.586743	0.998	0.97	0	Spinous cells_AGR2 high	ENSOARG00020025291
0	0.582793	1	0.994	0	Spinous cells_AGR2 high	RPL31
0	0.582707	0.999	0.987	0	Spinous cells_AGR2 high	ENSOARG00020001437
0	0.580044	1	0.989	0	Spinous cells_AGR2 high	RPL18
0	0.572974	0.994	0.89	0	Spinous cells_AGR2 high	ATP5MC2
0	0.572852	0.475	0.094	0	Spinous cells_AGR2 high	RETREG1
0	0.571077	0.339	0.041	0	Spinous cells_AGR2 high	ELF5
0	0.570894	0.999	0.991	0	Spinous cells_AGR2 high	RPLP0
0	0.569242	1	0.991	0	Spinous cells_AGR2 high	RPS5
0	0.564162	0.939	0.69	0	Spinous cells_AGR2 high	CSTB
0	0.560565	0.534	0.21	0	Spinous cells_AGR2 high	GMDS
0	0.557739	0.999	0.985	0	Spinous cells_AGR2 high	RPL28
0	0.550726	0.492	0.192	0	Spinous cells_AGR2 high	CXADR
0	0.548861	1	0.995	0	Spinous cells_AGR2 high	ENSOARG00020022219
0	0.546217	0.146	0.022	0	Spinous cells_AGR2 high	ENSOARG00020024015
0	0.546129	0.999	0.988	0	Spinous cells_AGR2 high	RPL35
0	0.545882	0.558	0.234	0	Spinous cells_AGR2 high	FERMT1
0	0.543828	1	0.995	0	Spinous cells_AGR2 high	RPL27A
0	0.543709	1	0.978	0	Spinous cells_AGR2 high	RPL26
0	0.537832	0.92	0.666	0	Spinous cells_AGR2 high	RPS26
0	0.536552	0.435	0.172	0	Spinous cells_AGR2 high	ENSOARG00020006805
0	0.534918	0.996	0.925	0	Spinous cells_AGR2 high	EEF1G
0	0.533555	1	0.989	0	Spinous cells_AGR2 high	RPL8
0	0.529074	0.996	0.954	0	Spinous cells_AGR2 high	ENSOARG00020008122
0	0.521489	0.364	0.08	0	Spinous cells_AGR2 high	TNNI1
0	0.520578	1	0.994	0	Spinous cells_AGR2 high	RPL10
0	0.518036	0.999	0.984	0	Spinous cells_AGR2 high	RPL29
0	0.517264	0.999	0.986	0	Spinous cells_AGR2 high	RPL23
0	0.516373	1	0.989	0	Spinous cells_AGR2 high	RPL18A
0	0.514773	0.839	0.505	0	Spinous cells_AGR2 high	PAFAH1B3
0	0.509675	0.999	0.966	0	Spinous cells_AGR2 high	ENSOARG00020002301
0	0.509493	1	0.986	0	Spinous cells_AGR2 high	ENSOARG00020022981
0	0.507623	1	0.986	0	Spinous cells_AGR2 high	RPL19
0	0.506672	0.998	0.967	0	Spinous cells_AGR2 high	ENSOARG00020019356
0	0.506036	0.605	0.301	0	Spinous cells_AGR2 high	ANXA2
0	0.505473	0.999	0.986	0	Spinous cells_AGR2 high	ENSOARG00020023953
0	0.504115	0.535	0.248	0	Spinous cells_AGR2 high	KLF5
0	0.503269	1	0.988	0	Spinous cells_AGR2 high	RPL11
0	0.501555	0.553	0.249	0	Spinous cells_AGR2 high	OXR1
0	0.496617	1	0.989	0	Spinous cells_AGR2 high	PIK3C2A
0	0.495266	1	0.985	0	Spinous cells_AGR2 high	RPS25.3
0	0.495124	1	0.983	0	Spinous cells_AGR2 high	ENSOARG00020022050
0	0.494898	0.994	0.899	0	Spinous cells_AGR2 high	RPL4
0	0.491732	0.536	0.245	0	Spinous cells_AGR2 high	HSD17B2
0	0.490451	0.953	0.724	0	Spinous cells_AGR2 high	PSMG4
0	0.489266	0.82	0.514	0	Spinous cells_AGR2 high	UQCC2
0	0.487639	0.657	0.315	0	Spinous cells_AGR2 high	PRXL2B
0	0.485361	0.351	0.088	0	Spinous cells_AGR2 high	ENSOARG00020019962
0	0.484209	0.539	0.238	0	Spinous cells_AGR2 high	TMEM238
0	0.482279	0.73	0.378	0	Spinous cells_AGR2 high	S100A16
0	0.481121	0.999	0.987	0	Spinous cells_AGR2 high	ENSOARG00020018336
0	0.478636	0.981	0.828	0	Spinous cells_AGR2 high	RPL27
0	0.476701	0.561	0.257	0	Spinous cells_AGR2 high	MYL6B
0	0.476085	0.998	0.977	0	Spinous cells_AGR2 high	ENSOARG00020012848
0	0.470197	1	0.982	0	Spinous cells_AGR2 high	RACK1
0	0.46932	0.414	0.146	0	Spinous cells_AGR2 high	IRX3
0	0.469082	0.998	0.966	0	Spinous cells_AGR2 high	ENSOARG00020009956
0	0.46385	1	0.989	0	Spinous cells_AGR2 high	RPS9
0	0.461682	1	0.989	0	Spinous cells_AGR2 high	RPL24
0	0.4614	0.334	0.06	0	Spinous cells_AGR2 high	STARD10
0	0.459757	0.529	0.239	0	Spinous cells_AGR2 high	GRTP1
0	0.448042	0.374	0.126	0	Spinous cells_AGR2 high	EGFR
0	0.44699	0.344	0.117	0	Spinous cells_AGR2 high	SPINK5
0	0.439538	0.328	0.057	0	Spinous cells_AGR2 high	HPN
0	0.435146	1	0.993	0	Spinous cells_AGR2 high	RPS12
0	0.43159	0.374	0.118	0	Spinous cells_AGR2 high	CPXM1
0	0.431398	0.242	0.012	0	Spinous cells_AGR2 high	JAKMIP2
0	0.428028	0.388	0.152	0	Spinous cells_AGR2 high	SERINC2
0	0.427466	0.481	0.152	0	Spinous cells_AGR2 high	PDGFA
0	0.424388	0.416	0.167	0	Spinous cells_AGR2 high	RAB25
0	0.423983	0.396	0.151	0	Spinous cells_AGR2 high	FGFR2
0	0.423639	0.997	0.937	0	Spinous cells_AGR2 high	ENSOARG00020026005
0	0.422225	0.999	0.984	0	Spinous cells_AGR2 high	RPL13
0	0.419136	0.997	0.962	0	Spinous cells_AGR2 high	HSP90AB1
0	0.416537	0.999	0.987	0	Spinous cells_AGR2 high	ENSOARG00020020958
0	0.414384	0.998	0.931	0	Spinous cells_AGR2 high	ENSOARG00020020312
0	0.410767	0.497	0.229	0	Spinous cells_AGR2 high	ENO1
0	0.41064	1	0.984	0	Spinous cells_AGR2 high	RPL9
0	0.406332	1	0.989	0	Spinous cells_AGR2 high	ENSOARG00020021320
0	0.404512	0.686	0.368	0	Spinous cells_AGR2 high	ENSOARG00020002318
0	0.40284	0.998	0.967	0	Spinous cells_AGR2 high	RPL30
0	0.399106	0.992	0.906	0	Spinous cells_AGR2 high	ENSOARG00020017285
0	0.398556	0.664	0.346	0	Spinous cells_AGR2 high	ENSOARG00020007752
0	0.398041	0.999	0.98	0	Spinous cells_AGR2 high	ENSOARG00020010263
0	0.395792	0.358	0.091	0	Spinous cells_AGR2 high	FAM174B
0	0.395119	0.239	0.042	0	Spinous cells_AGR2 high	CA3
0	0.393375	0.751	0.421	0	Spinous cells_AGR2 high	ATXN7L3B
0	0.393279	0.22	0.049	0	Spinous cells_AGR2 high	CDH1
0	0.392799	0.331	0.096	0	Spinous cells_AGR2 high	STK32C
0	0.390506	0.999	0.989	0	Spinous cells_AGR2 high	ENSOARG00020011816
0	0.389525	0.245	0.051	0	Spinous cells_AGR2 high	C16orf89
0	0.387786	0.272	0.077	0	Spinous cells_AGR2 high	F3
0	0.38682	0.997	0.959	0	Spinous cells_AGR2 high	RPS21
0	0.386555	0.988	0.88	0	Spinous cells_AGR2 high	PFDN5
0	0.385332	0.28	0.085	0	Spinous cells_AGR2 high	ITGA2
0	0.374491	0.396	0.165	0	Spinous cells_AGR2 high	PKP4
0	0.362096	0.324	0.073	0	Spinous cells_AGR2 high	TOX3
0	0.359452	0.284	0.046	0	Spinous cells_AGR2 high	ENSOARG00020025260
0	0.356774	0.194	0.019	0	Spinous cells_AGR2 high	ENSOARG00020005400
0	0.352431	0.161	0.003	0	Spinous cells_AGR2 high	SFTA2
0	0.34908	0.789	0.429	0	Spinous cells_AGR2 high	ANXA1
0	0.347298	0.22	0.043	0	Spinous cells_AGR2 high	ACSM3
0	0.345313	0.348	0.107	0	Spinous cells_AGR2 high	ENSOARG00020022912
0	0.342256	0.999	0.986	0	Spinous cells_AGR2 high	RPL37A
0	0.339823	1	0.992	0	Spinous cells_AGR2 high	RPS27A
0	0.338321	0.243	0.057	0	Spinous cells_AGR2 high	STX19
0	0.33235	0.392	0.125	0	Spinous cells_AGR2 high	ENSOARG00020019393
0	0.330213	0.258	0.055	0	Spinous cells_AGR2 high	ALCAM
0	0.325196	0.376	0.146	0	Spinous cells_AGR2 high	MLLT3
0	0.322747	0.266	0.087	0	Spinous cells_AGR2 high	SERPINB5
0	0.315661	0.999	0.988	0	Spinous cells_AGR2 high	RPL14
0	0.310058	0.788	0.397	0	Spinous cells_AGR2 high	IGFBP5
0	0.302128	0.43	0.114	0	Spinous cells_AGR2 high	ENSOARG00020017125
0	0.301615	0.437	0.175	0	Spinous cells_AGR2 high	HMGB3
0	0.301218	0.446	0.187	0	Spinous cells_AGR2 high	CAPG
0	0.300603	0.999	0.994	0	Spinous cells_AGR2 high	RPS11
0	0.299188	1	0.992	0	Spinous cells_AGR2 high	UBA52
0	0.292801	0.235	0.066	0	Spinous cells_AGR2 high	WNK4
0	0.286862	0.999	0.988	0	Spinous cells_AGR2 high	FAU
0	0.285222	0.23	0.051	0	Spinous cells_AGR2 high	NAALADL2
0	0.284913	0.244	0.054	0	Spinous cells_AGR2 high	LCK
0	0.276108	0.212	0.059	0	Spinous cells_AGR2 high	TM7SF2
0	0.274473	0.276	0.09	0	Spinous cells_AGR2 high	ENSOARG00020002139
0	0.271041	0.2	0.016	0	Spinous cells_AGR2 high	B3GAT2
0	0.265773	0.239	0.066	0	Spinous cells_AGR2 high	IGSF9
0	0.261959	0.219	0.059	0	Spinous cells_AGR2 high	BCAM
0	0.257168	0.264	0.069	0	Spinous cells_AGR2 high	RAMP1
0	0.253115	0.205	0.05	0	Spinous cells_AGR2 high	ANXA3
0	0.250494	0.196	0.048	0	Spinous cells_AGR2 high	KCNG2
5.35861e-308	0.368392	0.331	0.125	9.97129e-304	Spinous cells_AGR2 high	ENSOARG00020001418
1.11754e-307	0.259768	0.219	0.065	2.07951e-303	Spinous cells_AGR2 high	HMGA1
1.23154e-306	0.276434	0.275	0.088	2.29165e-302	Spinous cells_AGR2 high	ENSOARG00020007267
9.36393e-306	0.522422	0.985	0.851	1.74244e-301	Spinous cells_AGR2 high	MIF
6.37057e-303	0.505657	0.876	0.54	1.18544e-298	Spinous cells_AGR2 high	PLP2
1.93857e-302	0.516511	0.944	0.672	3.60728e-298	Spinous cells_AGR2 high	GAPDH
4.05898e-301	0.592644	0.817	0.548	7.55295e-297	Spinous cells_AGR2 high	ENSOARG00020004948
1.29229e-300	0.43025	0.976	0.83	2.40469e-296	Spinous cells_AGR2 high	TMA7
1.13876e-299	0.395153	0.536	0.247	2.11901e-295	Spinous cells_AGR2 high	ENSOARG00020019330
1.29782e-299	0.388133	0.332	0.129	2.41498e-295	Spinous cells_AGR2 high	PERP
8.77966e-299	0.549511	0.9	0.676	1.63372e-294	Spinous cells_AGR2 high	ENSOARG00020002933
1.7423e-295	0.479172	0.943	0.674	3.24208e-291	Spinous cells_AGR2 high	ENSOARG00020007966
4.00938e-286	0.36896	0.399	0.175	7.46066e-282	Spinous cells_AGR2 high	ENSOARG00020025395
6.22272e-286	0.255007	1	0.994	1.15792e-281	Spinous cells_AGR2 high	ENSOARG00020026205
4.64216e-281	0.387407	0.401	0.177	8.63814e-277	Spinous cells_AGR2 high	KIAA1217
1.47978e-276	0.317834	0.547	0.269	2.75357e-272	Spinous cells_AGR2 high	BUD23
1.2203e-274	0.431046	0.911	0.65	2.27073e-270	Spinous cells_AGR2 high	C9orf16
1.57662e-274	0.344954	0.482	0.229	2.93378e-270	Spinous cells_AGR2 high	NME4
5.78498e-273	0.354453	0.995	0.925	1.07647e-268	Spinous cells_AGR2 high	ENSOARG00020017190
5.89481e-269	0.5771	0.66	0.378	1.09691e-264	Spinous cells_AGR2 high	ATP1B1
2.4105e-266	0.260183	0.55	0.265	4.48547e-262	Spinous cells_AGR2 high	CYBA
5.75674e-266	0.374213	0.955	0.753	1.07121e-261	Spinous cells_AGR2 high	ENSOARG00020019951
1.49975e-264	0.378133	0.651	0.361	2.79073e-260	Spinous cells_AGR2 high	ENSOARG00020026385
4.5873e-256	0.310605	0.612	0.328	8.53605e-252	Spinous cells_AGR2 high	DMAC1
7.4802e-255	0.343241	0.468	0.221	1.39192e-250	Spinous cells_AGR2 high	SESN3
1.82582e-251	0.397891	0.582	0.309	3.39749e-247	Spinous cells_AGR2 high	ENSOARG00020025903
2.98042e-248	0.308011	0.394	0.176	5.54597e-244	Spinous cells_AGR2 high	CD2AP
7.48125e-248	0.434538	0.817	0.536	1.39211e-243	Spinous cells_AGR2 high	ENSOARG00020006888
1.53343e-245	0.356238	0.649	0.373	2.85341e-241	Spinous cells_AGR2 high	ENSOARG00020012767
5.10064e-245	0.269961	0.54	0.267	9.49127e-241	Spinous cells_AGR2 high	CBX5
2.40654e-243	0.324522	0.621	0.334	4.47808e-239	Spinous cells_AGR2 high	PLTP
2.75244e-239	0.295147	0.385	0.171	5.12174e-235	Spinous cells_AGR2 high	CCDC6
1.6954e-235	0.291032	0.998	0.97	3.15481e-231	Spinous cells_AGR2 high	ENSOARG00020012335
3.67214e-235	0.339484	0.696	0.413	6.83312e-231	Spinous cells_AGR2 high	ENSOARG00020006104
2.30712e-234	0.342903	0.608	0.342	4.29309e-230	Spinous cells_AGR2 high	ENSOARG00020012822
6.88677e-234	0.283314	0.358	0.157	1.28149e-229	Spinous cells_AGR2 high	AFDN
1.22755e-233	0.406802	0.902	0.654	2.28422e-229	Spinous cells_AGR2 high	EIF3F
2.81831e-233	0.298205	0.991	0.909	5.24432e-229	Spinous cells_AGR2 high	RPL36AL
6.17477e-233	0.319917	0.569	0.303	1.149e-228	Spinous cells_AGR2 high	PKM
3.25293e-232	0.292928	0.311	0.131	6.05304e-228	Spinous cells_AGR2 high	BAIAP2L1
6.38399e-232	0.25103	0.424	0.197	1.18793e-227	Spinous cells_AGR2 high	TSEN34
3.42373e-230	0.353798	0.875	0.624	6.37088e-226	Spinous cells_AGR2 high	ENSOARG00020002907
3.2229e-226	0.294583	0.606	0.336	5.99718e-222	Spinous cells_AGR2 high	C9orf116
3.47683e-226	0.329548	0.841	0.512	6.46968e-222	Spinous cells_AGR2 high	PDLIM1
1.02701e-221	0.305982	0.548	0.29	1.91107e-217	Spinous cells_AGR2 high	MSH6
7.08162e-221	0.326207	0.552	0.298	1.31775e-216	Spinous cells_AGR2 high	KDM5B
1.07537e-217	0.301854	0.968	0.476	2.00105e-213	Spinous cells_AGR2 high	ENSOARG00020015582
5.15607e-215	0.253581	0.444	0.218	9.59442e-211	Spinous cells_AGR2 high	CHRAC1
1.35573e-214	0.340507	0.971	0.83	2.52274e-210	Spinous cells_AGR2 high	EIF3M
6.14809e-212	0.33504	0.703	0.435	1.14404e-207	Spinous cells_AGR2 high	ENSOARG00020017291
5.77835e-211	0.321324	0.429	0.213	1.07524e-206	Spinous cells_AGR2 high	PDZK1IP1
2.26861e-209	0.364452	0.84	0.566	4.22143e-205	Spinous cells_AGR2 high	SLIRP
9.33516e-207	0.32451	0.629	0.37	1.73709e-202	Spinous cells_AGR2 high	ENSOARG00020022058
8.49051e-205	0.34404	0.88	0.643	1.57991e-200	Spinous cells_AGR2 high	C19orf53
7.63181e-203	0.355689	0.457	0.234	1.42013e-198	Spinous cells_AGR2 high	COL17A1
5.76138e-199	0.272722	0.539	0.294	1.07208e-194	Spinous cells_AGR2 high	ENSOARG00020000678
7.64995e-199	0.26103	0.759	0.462	1.4235e-194	Spinous cells_AGR2 high	ENSOARG00020005804
1.79819e-198	0.391913	0.778	0.519	3.34608e-194	Spinous cells_AGR2 high	ATP2B1
7.39871e-194	0.340256	0.843	0.585	1.37675e-189	Spinous cells_AGR2 high	TRMT112
7.13308e-193	0.314409	0.735	0.466	1.32732e-188	Spinous cells_AGR2 high	STMP1
1.52456e-190	0.272243	0.333	0.157	2.8369e-186	Spinous cells_AGR2 high	MAPK13
1.88159e-188	0.327331	0.958	0.788	3.50126e-184	Spinous cells_AGR2 high	PRDX2
1.50602e-187	0.341878	0.759	0.501	2.8024e-183	Spinous cells_AGR2 high	POLR1D
4.98725e-187	0.283684	0.855	0.601	9.28028e-183	Spinous cells_AGR2 high	RTRAF
2.64806e-186	0.333957	0.816	0.549	4.92752e-182	Spinous cells_AGR2 high	FBL
3.31026e-186	0.367285	0.851	0.589	6.15974e-182	Spinous cells_AGR2 high	ENSOARG00020005655
7.44591e-180	0.268235	0.444	0.235	1.38553e-175	Spinous cells_AGR2 high	ENSOARG00020024115
1.59063e-179	0.290126	0.599	0.361	2.95985e-175	Spinous cells_AGR2 high	LRRFIP1
2.72578e-179	0.257383	0.636	0.382	5.07214e-175	Spinous cells_AGR2 high	ERP29
7.52913e-178	0.316104	0.251	0.106	1.40102e-173	Spinous cells_AGR2 high	ELF3
1.084e-176	0.287288	0.647	0.398	2.01711e-172	Spinous cells_AGR2 high	ENSOARG00020023861
1.7635e-170	0.322749	0.402	0.204	3.28152e-166	Spinous cells_AGR2 high	CLDN4
2.81535e-169	0.260801	0.85	0.605	5.2388e-165	Spinous cells_AGR2 high	BRI3
2.94741e-169	0.29743	0.789	0.519	5.48455e-165	Spinous cells_AGR2 high	CNPY2
3.51752e-169	0.311231	0.936	0.764	6.5454e-165	Spinous cells_AGR2 high	EIF3G
2.74687e-157	0.293641	0.968	0.832	5.11138e-153	Spinous cells_AGR2 high	EIF3K
2.85859e-154	0.287032	0.866	0.646	5.31926e-150	Spinous cells_AGR2 high	rpl23a
7.94944e-153	0.321188	0.619	0.361	1.47923e-148	Spinous cells_AGR2 high	KRT5
2.13652e-150	0.256182	0.752	0.505	3.97563e-146	Spinous cells_AGR2 high	ENSOARG00020026346
2.2254e-150	0.259547	0.546	0.329	4.14102e-146	Spinous cells_AGR2 high	CSKMT
3.78133e-149	0.254231	0.74	0.492	7.0363e-145	Spinous cells_AGR2 high	SNRPF
3.5153e-148	0.30896	0.367	0.198	6.54127e-144	Spinous cells_AGR2 high	CD109
9.95286e-146	0.28773	0.908	0.695	1.85203e-141	Spinous cells_AGR2 high	EIF3H
1.04983e-144	0.28677	0.853	0.614	1.95352e-140	Spinous cells_AGR2 high	RPS12.1
1.18643e-142	0.351002	0.987	0.908	2.2077e-138	Spinous cells_AGR2 high	ENSOARG00020014163
1.00164e-136	0.272165	0.722	0.476	1.86386e-132	Spinous cells_AGR2 high	ENSOARG00020006229
9.05982e-128	0.258113	0.262	0.129	1.68585e-123	Spinous cells_AGR2 high	ENSOARG00020012305
2.94183e-123	0.511108	0.782	0.646	5.47416e-119	Spinous cells_AGR2 high	ENSOARG00020019793
6.19934e-123	0.257461	0.918	0.734	1.15357e-118	Spinous cells_AGR2 high	ENSOARG00020011522
4.01184e-118	0.251908	0.593	0.365	7.46524e-114	Spinous cells_AGR2 high	CLCA2
6.88378e-108	0.285308	0.267	0.142	1.28093e-103	Spinous cells_AGR2 high	ENSOARG00020024927
8.48508e-106	0.317952	0.339	0.196	1.5789e-101	Spinous cells_AGR2 high	DSC2
7.3039e-95	0.266387	0.325	0.189	1.35911e-90	Spinous cells_AGR2 high	CTSV
0	2.40397	0.993	0.513	0	Spinous cells_IGFBP6 high	IGFBP6
0	2.36039	0.992	0.408	0	Spinous cells_IGFBP6 high	KRT15
0	1.65561	0.613	0.049	0	Spinous cells_IGFBP6 high	ENSOARG00020018045
0	1.6106	0.639	0.092	0	Spinous cells_IGFBP6 high	TFF3
0	1.52697	0.976	0.53	0	Spinous cells_IGFBP6 high	IGFBP2
0	1.48278	0.825	0.17	0	Spinous cells_IGFBP6 high	KRT7
0	1.45506	0.765	0.217	0	Spinous cells_IGFBP6 high	COL17A1
0	1.2668	0.885	0.345	0	Spinous cells_IGFBP6 high	KRT5
0	1.20641	0.526	0.072	0	Spinous cells_IGFBP6 high	KRT4
0	1.10634	0.642	0.254	0	Spinous cells_IGFBP6 high	IGFBP3
0	1.09389	0.997	0.891	0	Spinous cells_IGFBP6 high	RPS2
0	1.03765	0.865	0.386	0	Spinous cells_IGFBP6 high	IGFBP5
0	1.03705	1	0.954	0	Spinous cells_IGFBP6 high	RPS6
0	1.02059	0.861	0.411	0	Spinous cells_IGFBP6 high	IDH1
0	1.01315	0.736	0.191	0	Spinous cells_IGFBP6 high	CD24
0	1.01115	0.982	0.591	0	Spinous cells_IGFBP6 high	ENSOARG00020010357
0	0.985389	1	0.986	0	Spinous cells_IGFBP6 high	RPL37A
0	0.962808	0.729	0.266	0	Spinous cells_IGFBP6 high	SOX2
0	0.960015	0.536	0.103	0	Spinous cells_IGFBP6 high	DLK2
0	0.949044	0.714	0.321	0	Spinous cells_IGFBP6 high	DSP
0	0.880235	0.998	0.909	0	Spinous cells_IGFBP6 high	EEF1D
0	0.865053	0.811	0.29	0	Spinous cells_IGFBP6 high	ENSOARG00020005568
0	0.863957	0.941	0.638	0	Spinous cells_IGFBP6 high	rpl23a
0	0.856525	0.614	0.232	0	Spinous cells_IGFBP6 high	ENSOARG00020015070
0	0.853252	0.998	0.897	0	Spinous cells_IGFBP6 high	RPL4
0	0.853235	0.702	0.282	0	Spinous cells_IGFBP6 high	ENSOARG00020000678
0	0.844968	0.945	0.662	0	Spinous cells_IGFBP6 high	ENSOARG00020007903
0	0.841815	1	0.988	0	Spinous cells_IGFBP6 high	RPL35
0	0.840375	0.724	0.414	0	Spinous cells_IGFBP6 high	UACA
0	0.834768	0.902	0.565	0	Spinous cells_IGFBP6 high	S100A11
0	0.833154	0.909	0.577	0	Spinous cells_IGFBP6 high	SYNE2
0	0.811309	0.38	0.055	0	Spinous cells_IGFBP6 high	U3.20
0	0.804751	0.999	0.938	0	Spinous cells_IGFBP6 high	ENSOARG00020019322
0	0.799915	0.554	0.143	0	Spinous cells_IGFBP6 high	DSG2
0	0.790818	0.502	0.127	0	Spinous cells_IGFBP6 high	MET
0	0.788213	0.537	0.173	0	Spinous cells_IGFBP6 high	HS3ST6
0	0.777165	1	0.969	0	Spinous cells_IGFBP6 high	ENSOARG00020025291
0	0.776773	1	0.997	0	Spinous cells_IGFBP6 high	RPS8
0	0.770448	0.828	0.415	0	Spinous cells_IGFBP6 high	SSBP4
0	0.768566	0.603	0.202	0	Spinous cells_IGFBP6 high	PDZK1IP1
0	0.766174	0.594	0.24	0	Spinous cells_IGFBP6 high	KLF5
0	0.740815	0.896	0.503	0	Spinous cells_IGFBP6 high	PDLIM1
0	0.740093	1	0.986	0	Spinous cells_IGFBP6 high	RPL23
0	0.73776	0.535	0.153	0	Spinous cells_IGFBP6 high	ENSOARG00020013946
0	0.731857	0.528	0.133	0	Spinous cells_IGFBP6 high	KRT18
0	0.726368	0.975	0.786	0	Spinous cells_IGFBP6 high	RPL17.2
0	0.723513	0.317	0.017	0	Spinous cells_IGFBP6 high	FMO2
0	0.721412	1	0.995	0	Spinous cells_IGFBP6 high	ENSOARG00020022219
0	0.71367	1	0.987	0	Spinous cells_IGFBP6 high	ENSOARG00020018336
0	0.713625	0.597	0.234	0	Spinous cells_IGFBP6 high	ZBTB7C
0	0.708656	0.985	0.465	0	Spinous cells_IGFBP6 high	ENSOARG00020015582
0	0.698868	1	0.993	0	Spinous cells_IGFBP6 high	ENSOARG00020013429
0	0.695281	0.661	0.293	0	Spinous cells_IGFBP6 high	ANXA2
0	0.690674	0.598	0.226	0	Spinous cells_IGFBP6 high	FERMT1
0	0.689443	1	0.987	0	Spinous cells_IGFBP6 high	ENSOARG00020001437
0	0.686928	1	0.994	0	Spinous cells_IGFBP6 high	RPL31
0	0.685754	1	0.988	0	Spinous cells_IGFBP6 high	RPL11
0	0.681797	1	0.989	0	Spinous cells_IGFBP6 high	ENSOARG00020002748
0	0.679373	0.732	0.345	0	Spinous cells_IGFBP6 high	TXNIP
0	0.678819	1	0.995	0	Spinous cells_IGFBP6 high	RPL32
0	0.677781	1	0.991	0	Spinous cells_IGFBP6 high	RPL7A
0	0.672641	1	0.974	0	Spinous cells_IGFBP6 high	RPL22
0	0.671778	1	0.991	0	Spinous cells_IGFBP6 high	RPS5
0	0.667888	1	0.997	0	Spinous cells_IGFBP6 high	RPLP1
0	0.661956	1	0.982	0	Spinous cells_IGFBP6 high	RACK1
0	0.660597	0.456	0.12	0	Spinous cells_IGFBP6 high	PERP
0	0.659426	1	0.982	0	Spinous cells_IGFBP6 high	ENSOARG00020013105
0	0.657072	1	0.965	0	Spinous cells_IGFBP6 high	ENSOARG00020002301
0	0.650955	0.799	0.331	0	Spinous cells_IGFBP6 high	LYPD2
0	0.65093	0.441	0.126	0	Spinous cells_IGFBP6 high	ENSOARG00020016651
0	0.645401	0.639	0.301	0	Spinous cells_IGFBP6 high	ENSOARG00020025903
0	0.643458	0.274	0.116	0	Spinous cells_IGFBP6 high	SPINK5
0	0.643297	0.999	0.978	0	Spinous cells_IGFBP6 high	ENSOARG00020001330
0	0.630652	1	0.992	0	Spinous cells_IGFBP6 high	RPL37
0	0.62717	0.889	0.5	0	Spinous cells_IGFBP6 high	PTGR1
0	0.627155	0.999	0.953	0	Spinous cells_IGFBP6 high	ENSOARG00020004797
0	0.625679	1	0.993	0	Spinous cells_IGFBP6 high	RPS11
0	0.619996	1	0.995	0	Spinous cells_IGFBP6 high	RPL27A
0	0.613486	0.903	0.532	0	Spinous cells_IGFBP6 high	PLP2
0	0.613418	0.999	0.967	0	Spinous cells_IGFBP6 high	ENSOARG00020019356
0	0.610337	0.5	0.234	0	Spinous cells_IGFBP6 high	TMEM238
0	0.610207	0.999	0.991	0	Spinous cells_IGFBP6 high	RPLP0
0	0.606732	1	0.995	0	Spinous cells_IGFBP6 high	RPS18
0	0.603888	1	0.994	0	Spinous cells_IGFBP6 high	ENSOARG00020026205
0	0.599542	1	0.986	0	Spinous cells_IGFBP6 high	RPL19
0	0.598429	0.546	0.195	0	Spinous cells_IGFBP6 high	CXCL14
0	0.594565	1	0.969	0	Spinous cells_IGFBP6 high	ENSOARG00020012335
0	0.591862	1	0.986	0	Spinous cells_IGFBP6 high	RPS20
0	0.591144	1	0.989	0	Spinous cells_IGFBP6 high	ENSOARG00020021320
0	0.588837	1	0.984	0	Spinous cells_IGFBP6 high	RPL13
0	0.58714	0.334	0.042	0	Spinous cells_IGFBP6 high	MEGF11
0	0.58708	0.365	0.075	0	Spinous cells_IGFBP6 high	TNNI1
0	0.586475	0.586	0.208	0	Spinous cells_IGFBP6 high	PDLIM4
0	0.583844	0.728	0.346	0	Spinous cells_IGFBP6 high	ENSOARG00020017637
0	0.578272	0.418	0.08	0	Spinous cells_IGFBP6 high	ENSOARG00020019962
0	0.572938	0.952	0.668	0	Spinous cells_IGFBP6 high	ENSOARG00020007966
0	0.567756	0.992	0.808	0	Spinous cells_IGFBP6 high	S100A10
0	0.567551	0.387	0.111	0	Spinous cells_IGFBP6 high	LAMA3
0	0.564666	0.965	0.734	0	Spinous cells_IGFBP6 high	ENSOARG00020022770
0	0.559487	1	0.984	0	Spinous cells_IGFBP6 high	RPL29
0	0.559363	0.511	0.145	0	Spinous cells_IGFBP6 high	PDGFA
0	0.559346	0.933	0.538	0	Spinous cells_IGFBP6 high	ENSOARG00020004948
0	0.551674	0.721	0.426	0	Spinous cells_IGFBP6 high	DST
0	0.544258	0.436	0.123	0	Spinous cells_IGFBP6 high	FAM126A
0	0.541518	1	0.977	0	Spinous cells_IGFBP6 high	ENSOARG00020012848
0	0.528844	0.998	0.924	0	Spinous cells_IGFBP6 high	EEF1G
0	0.528462	1	0.989	0	Spinous cells_IGFBP6 high	RPS9
0	0.523104	1	0.979	0	Spinous cells_IGFBP6 high	RPL3
0	0.521365	0.84	0.466	0	Spinous cells_IGFBP6 high	CSRP2
0	0.517627	0.431	0.148	0	Spinous cells_IGFBP6 high	EPCAM
0	0.517315	0.855	0.584	0	Spinous cells_IGFBP6 high	ENSOARG00020005655
0	0.511218	1	0.977	0	Spinous cells_IGFBP6 high	RPL36
0	0.509532	0.999	0.979	0	Spinous cells_IGFBP6 high	ENSOARG00020016079
0	0.508986	1	0.986	0	Spinous cells_IGFBP6 high	ENSOARG00020023953
0	0.508261	0.958	0.715	0	Spinous cells_IGFBP6 high	ENSOARG00020003728
0	0.507703	0.995	0.906	0	Spinous cells_IGFBP6 high	ENSOARG00020014163
0	0.503211	0.997	0.924	0	Spinous cells_IGFBP6 high	ENSOARG00020017190
0	0.501793	0.38	0.099	0	Spinous cells_IGFBP6 high	CLDN7
0	0.498913	1	0.989	0	Spinous cells_IGFBP6 high	RPL18
0	0.497901	0.552	0.251	0	Spinous cells_IGFBP6 high	MYL6B
0	0.495572	0.341	0.038	0	Spinous cells_IGFBP6 high	ENSOARG00020013806
0	0.495421	1	0.995	0	Spinous cells_IGFBP6 high	ENSOARG00020004572
0	0.49541	0.368	0.121	0	Spinous cells_IGFBP6 high	EGFR
0	0.493563	0.463	0.187	0	Spinous cells_IGFBP6 high	CXADR
0	0.488432	0.999	0.982	0	Spinous cells_IGFBP6 high	ENSOARG00020022050
0	0.486582	0.309	0.037	0	Spinous cells_IGFBP6 high	KRT8
0	0.486385	0.517	0.244	0	Spinous cells_IGFBP6 high	OXR1
0	0.483831	1	0.989	0	Spinous cells_IGFBP6 high	PIK3C2A
0	0.480491	1	0.984	0	Spinous cells_IGFBP6 high	RPSA
0	0.479964	0.383	0.129	0	Spinous cells_IGFBP6 high	TMPRSS11A
0	0.475642	1	0.994	0	Spinous cells_IGFBP6 high	RPL10
0	0.466385	1	0.989	0	Spinous cells_IGFBP6 high	RPL8
0	0.46341	1	0.987	0	Spinous cells_IGFBP6 high	RPS10
0	0.463051	0.983	0.829	0	Spinous cells_IGFBP6 high	EIF3K
0	0.454065	0.853	0.377	0	Spinous cells_IGFBP6 high	ADIRF
0	0.452713	0.335	0.108	0	Spinous cells_IGFBP6 high	TP63
0	0.447515	0.784	0.513	0	Spinous cells_IGFBP6 high	ATP2B1
0	0.443945	0.929	0.637	0	Spinous cells_IGFBP6 high	ENSOARG00020019793
0	0.443576	0.997	0.902	0	Spinous cells_IGFBP6 high	ENSOARG00020013487
0	0.443038	1	0.984	0	Spinous cells_IGFBP6 high	RPL9
0	0.437392	0.397	0.173	0	Spinous cells_IGFBP6 high	KIAA1217
[truncated: 16,464 more rows]

## Sheet: Table S8
Table S8. Genes for the cell subtypes defined by rumen scRNA-seq data in goats.
The column name annotation: p_val (p_value); avg_logFC (average log fold change); pct.1 (ratio of cells in this cluster that expressed the gene); pct.2 (ratio of cells in the rest of clusters that expressed the gene); p_val_adj (Bonferroni corrected p_value).
p_val	Avg_log2FC	Pct.1	Pct.2	P_val_adj	Cell types	Genes
0	2.19433	0.992	0.486	0	Proliferating basal cells	ENSCHIG00000010553
0	2.10378	0.672	0.056	0	Proliferating basal cells	CENPF
0	2.09594	0.769	0.056	0	Proliferating basal cells	TOP2A
0	1.97083	0.879	0.317	0	Proliferating basal cells	CA3
0	1.72924	0.815	0.185	0	Proliferating basal cells	ENSCHIG00000027118
0	1.72521	0.921	0.29	0	Proliferating basal cells	ENSCHIG00000011113
0	1.68611	0.906	0.309	0	Proliferating basal cells	KRT14
0	1.65736	0.773	0.039	0	Proliferating basal cells	MIS18BP1
0	1.62813	0.667	0.027	0	Proliferating basal cells	ENSCHIG00000023816
0	1.60727	0.758	0.096	0	Proliferating basal cells	CKAP2
0	1.60253	0.715	0.062	0	Proliferating basal cells	TPX2
0	1.54331	0.969	0.457	0	Proliferating basal cells	ENSCHIG00000018247
0	1.52168	0.993	0.515	0	Proliferating basal cells	IGFBP2
0	1.50612	0.97	0.433	0	Proliferating basal cells	ENSCHIG00000023823
0	1.46251	0.834	0.065	0	Proliferating basal cells	SPC24
0	1.46179	0.812	0.392	0	Proliferating basal cells	ENSCHIG00000020087
0	1.44619	0.789	0.115	0	Proliferating basal cells	KIF20B
0	1.44507	0.925	0.295	0	Proliferating basal cells	ENSCHIG00000025317
0	1.43868	0.84	0.105	0	Proliferating basal cells	SMC2
0	1.42861	0.564	0.029	0	Proliferating basal cells	ENSCHIG00000020079
0	1.4014	0.851	0.077	0	Proliferating basal cells	CENPW
0	1.39844	0.995	0.529	0	Proliferating basal cells	S100A2
0	1.39773	0.996	0.752	0	Proliferating basal cells	H2AFZ
0	1.38033	0.506	0.042	0	Proliferating basal cells	ENSCHIG00000016273
0	1.37583	0.787	0.087	0	Proliferating basal cells	UHRF1
0	1.3613	0.99	0.795	0	Proliferating basal cells	H2AFV
0	1.30034	0.942	0.373	0	Proliferating basal cells	ALDH1A1
0	1.28439	0.606	0.027	0	Proliferating basal cells	NEK2
0	1.28267	0.907	0.331	0	Proliferating basal cells	DAPL1
0	1.28234	0.987	0.77	0	Proliferating basal cells	MIF
0	1.27643	0.713	0.116	0	Proliferating basal cells	ENSCHIG00000007655
0	1.26915	0.636	0.161	0	Proliferating basal cells	ENSCHIG00000021894
0	1.25995	0.813	0.141	0	Proliferating basal cells	SMC4
0	1.22881	0.929	0.334	0	Proliferating basal cells	RNASEH2C
0	1.20623	0.987	0.643	0	Proliferating basal cells	ENSCHIG00000023552
0	1.18759	0.919	0.445	0	Proliferating basal cells	MGST1
0	1.1825	0.804	0.256	0	Proliferating basal cells	KRT19
0	1.17644	0.952	0.324	0	Proliferating basal cells	KLF5
0	1.14801	0.997	0.906	0	Proliferating basal cells	HMGB1
0	1.14681	0.596	0.026	0	Proliferating basal cells	BUB1B
0	1.14449	0.912	0.324	0	Proliferating basal cells	ENSCHIG00000021113
0	1.11652	0.732	0.176	0	Proliferating basal cells	REEP4
0	1.10836	0.524	0.036	0	Proliferating basal cells	PRC1
0	1.10258	0.718	0.097	0	Proliferating basal cells	RACGAP1
0	1.10001	0.896	0.379	0	Proliferating basal cells	KRT17
0	1.09185	0.933	0.587	0	Proliferating basal cells	UBE2S
0	1.08005	0.655	0.125	0	Proliferating basal cells	NT5C
0	1.07968	0.77	0.118	0	Proliferating basal cells	KRTCAP3
0	1.07123	0.61	0.046	0	Proliferating basal cells	ANLN
0	1.06869	0.93	0.333	0	Proliferating basal cells	TPMT
0	1.06255	0.707	0.058	0	Proliferating basal cells	NCAPG
0	1.05908	0.739	0.064	0	Proliferating basal cells	CENPK
0	1.04696	0.856	0.215	0	Proliferating basal cells	LMNB1
0	1.04416	0.52	0.034	0	Proliferating basal cells	CENPE
0	1.04134	0.441	0.016	0	Proliferating basal cells	ASPM
0	1.02901	0.53	0.027	0	Proliferating basal cells	HMMR
0	1.01699	0.99	0.892	0	Proliferating basal cells	TUBA1B
0	1.01425	0.896	0.44	0	Proliferating basal cells	SIVA1
0	1.0096	0.473	0.023	0	Proliferating basal cells	CCNB2
0	1.00864	0.954	0.315	0	Proliferating basal cells	KRT15
0	0.996513	0.552	0.019	0	Proliferating basal cells	CDCA8
0	0.992417	0.651	0.048	0	Proliferating basal cells	KIF22
0	0.989521	0.497	0.021	0	Proliferating basal cells	CDCA2
0	0.986803	0.571	0.133	0	Proliferating basal cells	CLDN1
0	0.986202	0.506	0.026	0	Proliferating basal cells	AURKA
0	0.982126	0.532	0.054	0	Proliferating basal cells	HJURP
0	0.970574	0.764	0.168	0	Proliferating basal cells	ENSCHIG00000012076
0	0.967102	0.998	0.929	0	Proliferating basal cells	ENSCHIG00000014133
0	0.955119	0.798	0.27	0	Proliferating basal cells	CALM3
0	0.955107	0.612	0.149	0	Proliferating basal cells	MCM5
0	0.940106	0.527	0.02	0	Proliferating basal cells	KIF11
0	0.931632	0.568	0.029	0	Proliferating basal cells	NDC80
0	0.926199	0.413	0.045	0	Proliferating basal cells	ENSCHIG00000011284
0	0.920653	0.56	0.038	0	Proliferating basal cells	NCAPD2
0	0.914963	0.49	0.017	0	Proliferating basal cells	AURKB
0	0.910487	0.503	0.034	0	Proliferating basal cells	KIF23
0	0.897152	0.695	0.149	0	Proliferating basal cells	PRRG4
0	0.894623	0.767	0.184	0	Proliferating basal cells	RRM1
0	0.894496	0.565	0.024	0	Proliferating basal cells	SGO1
0	0.893707	0.759	0.196	0	Proliferating basal cells	SERPINB10
0	0.891283	0.985	0.73	0	Proliferating basal cells	DEK
0	0.888496	0.521	0.039	0	Proliferating basal cells	ECT2
0	0.873156	0.688	0.146	0	Proliferating basal cells	EHF
0	0.8716	0.593	0.036	0	Proliferating basal cells	NUF2
0	0.863491	0.869	0.455	0	Proliferating basal cells	ENSCHIG00000004827
0	0.862858	0.926	0.516	0	Proliferating basal cells	ENSCHIG00000010963
0	0.861994	0.754	0.201	0	Proliferating basal cells	RFC4
0	0.859624	0.893	0.318	0	Proliferating basal cells	ENSCHIG00000000097
0	0.852938	0.535	0.029	0	Proliferating basal cells	KIFC1
0	0.851873	0.825	0.232	0	Proliferating basal cells	TUBA4A
0	0.849493	0.723	0.169	0	Proliferating basal cells	TMEM238
0	0.84401	0.945	0.499	0	Proliferating basal cells	ENSCHIG00000001147
0	0.841918	0.909	0.339	0	Proliferating basal cells	TST
0	0.841573	0.975	0.748	0	Proliferating basal cells	TXN
0	0.840366	0.963	0.501	0	Proliferating basal cells	PITX1
0	0.837576	0.822	0.21	0	Proliferating basal cells	KRT5
0	0.836655	0.715	0.181	0	Proliferating basal cells	HS3ST6
0	0.836314	0.521	0.031	0	Proliferating basal cells	ENSCHIG00000013117
0	0.833844	0.571	0.053	0	Proliferating basal cells	CLSPN
0	0.83138	0.913	0.453	0	Proliferating basal cells	BUD23
0	0.820445	0.488	0.103	0	Proliferating basal cells	HIST2H2AC
0	0.815098	0.583	0.031	0	Proliferating basal cells	CENPN
0	0.814385	0.677	0.107	0	Proliferating basal cells	CCDC34
0	0.81237	0.678	0.141	0	Proliferating basal cells	ATAD2
0	0.810784	0.937	0.522	0	Proliferating basal cells	CMBL
0	0.810226	0.605	0.123	0	Proliferating basal cells	FAM83D
0	0.800237	0.773	0.202	0	Proliferating basal cells	SOX2
0	0.773072	0.971	0.664	0	Proliferating basal cells	ENSCHIG00000015711
0	0.761584	0.609	0.074	0	Proliferating basal cells	RHNO1
0	0.759665	0.736	0.187	0	Proliferating basal cells	COQ7
0	0.757356	0.498	0.018	0	Proliferating basal cells	ESCO2
0	0.754753	0.839	0.236	0	Proliferating basal cells	TMPRSS11A
0	0.75304	0.345	0.091	0	Proliferating basal cells	AREG
0	0.752342	0.473	0.028	0	Proliferating basal cells	NUSAP1
0	0.750557	0.857	0.396	0	Proliferating basal cells	CHCHD10
0	0.749668	0.72	0.326	0	Proliferating basal cells	BHLHE40
0	0.746825	0.517	0.025	0	Proliferating basal cells	BUB1
0	0.742686	0.627	0.169	0	Proliferating basal cells	MCM3
0	0.737259	0.391	0.025	0	Proliferating basal cells	HIST1H1B
0	0.73668	0.412	0.115	0	Proliferating basal cells	ENSCHIG00000016878
0	0.724973	0.757	0.234	0	Proliferating basal cells	MCM7
0	0.717275	0.878	0.396	0	Proliferating basal cells	CAT
0	0.714559	0.584	0.118	0	Proliferating basal cells	KCNK1
0	0.712768	0.559	0.04	0	Proliferating basal cells	MND1
0	0.70664	0.419	0.012	0	Proliferating basal cells	DLGAP5
0	0.705145	0.816	0.29	0	Proliferating basal cells	ENSCHIG00000019264
0	0.70398	0.489	0.031	0	Proliferating basal cells	DIAPH3
0	0.702315	0.516	0.036	0	Proliferating basal cells	NCAPG2
0	0.700009	0.448	0.022	0	Proliferating basal cells	FBXO5
0	0.698201	0.974	0.767	0	Proliferating basal cells	COX5B
0	0.696571	0.743	0.19	0	Proliferating basal cells	CLCA2
0	0.69435	0.998	0.962	0	Proliferating basal cells	ENSCHIG00000022463
0	0.692098	0.719	0.203	0	Proliferating basal cells	TMPO
0	0.691091	0.641	0.133	0	Proliferating basal cells	LIG1
0	0.688471	0.452	0.031	0	Proliferating basal cells	CKAP2L
0	0.687185	0.417	0.016	0	Proliferating basal cells	CDCA3
0	0.685434	0.908	0.45	0	Proliferating basal cells	ENSCHIG00000013087
0	0.682897	0.743	0.211	0	Proliferating basal cells	ENSCHIG00000018489
0	0.681142	0.765	0.299	0	Proliferating basal cells	RAD21
0	0.678223	0.462	0.096	0	Proliferating basal cells	SGO2
0	0.677645	0.724	0.2	0	Proliferating basal cells	IRX3
0	0.673831	0.974	0.682	0	Proliferating basal cells	ENSCHIG00000004382
0	0.666659	0.963	0.637	0	Proliferating basal cells	S100A11
0	0.666097	0.884	0.412	0	Proliferating basal cells	ENSCHIG00000012507
0	0.664728	0.584	0.095	0	Proliferating basal cells	DTYMK
0	0.657411	0.609	0.154	0	Proliferating basal cells	ENSCHIG00000015151
0	0.653469	0.71	0.221	0	Proliferating basal cells	GSR
0	0.652508	0.966	0.679	0	Proliferating basal cells	ENSCHIG00000025449
0	0.652317	0.612	0.129	0	Proliferating basal cells	PHGDH
0	0.651263	0.963	0.614	0	Proliferating basal cells	ENSCHIG00000019224
0	0.646852	0.724	0.24	0	Proliferating basal cells	EDN3
0	0.641309	0.689	0.172	0	Proliferating basal cells	COL17A1
0	0.641285	0.614	0.148	0	Proliferating basal cells	NDE1
0	0.640622	0.519	0.106	0	Proliferating basal cells	THEM5
0	0.640521	0.79	0.436	0	Proliferating basal cells	ENSCHIG00000024121
0	0.637694	0.99	0.837	0	Proliferating basal cells	ENSCHIG00000024945
0	0.630777	0.47	0.043	0	Proliferating basal cells	TCF19
0	0.630665	0.875	0.341	0	Proliferating basal cells	ENSCHIG00000022058
0	0.628006	0.566	0.102	0	Proliferating basal cells	ESRP1
0	0.616852	0.419	0.02	0	Proliferating basal cells	KNL1
0	0.606882	0.527	0.077	0	Proliferating basal cells	NDC1
0	0.603313	0.847	0.347	0	Proliferating basal cells	AHCY
0	0.60317	0.948	0.595	0	Proliferating basal cells	NDUFA12
0	0.602039	0.662	0.164	0	Proliferating basal cells	MGST2
0	0.601511	0.81	0.363	0	Proliferating basal cells	ENSCHIG00000018336
0	0.601041	0.804	0.377	0	Proliferating basal cells	TUBB
0	0.59985	0.767	0.263	0	Proliferating basal cells	ENSCHIG00000023286
0	0.599517	0.893	0.432	0	Proliferating basal cells	SMC3
0	0.59616	0.441	0.053	0	Proliferating basal cells	PSRC1
0	0.594626	0.444	0.018	0	Proliferating basal cells	MELK
0	0.588583	0.924	0.513	0	Proliferating basal cells	SSRP1
0	0.587953	0.772	0.288	0	Proliferating basal cells	NAXE
0	0.585633	0.699	0.187	0	Proliferating basal cells	TFAP2A
0	0.584583	0.772	0.26	0	Proliferating basal cells	FGFR2
0	0.577287	0.866	0.436	0	Proliferating basal cells	UQCRC1
0	0.57278	0.728	0.228	0	Proliferating basal cells	NSMCE4A
0	0.569851	0.474	0.034	0	Proliferating basal cells	SPC25
0	0.567536	0.636	0.161	0	Proliferating basal cells	DIPK1C
0	0.567246	0.458	0.035	0	Proliferating basal cells	DCK
0	0.566454	0.672	0.21	0	Proliferating basal cells	DSP
0	0.56219	0.344	0.01	0	Proliferating basal cells	PRR11
0	0.557379	0.376	0.011	0	Proliferating basal cells	TTK
0	0.556365	0.517	0.139	0	Proliferating basal cells	ENSCHIG00000015228
0	0.546686	0.66	0.182	0	Proliferating basal cells	USP1
0	0.54662	0.8	0.33	0	Proliferating basal cells	ATP1B1
0	0.545543	0.669	0.247	0	Proliferating basal cells	SLBP
0	0.540122	0.664	0.185	0	Proliferating basal cells	HSD17B2
0	0.539191	0.719	0.232	0	Proliferating basal cells	MRPS25
0	0.537079	0.511	0.086	0	Proliferating basal cells	ENSCHIG00000025606
0	0.53452	0.655	0.182	0	Proliferating basal cells	ETFDH
0	0.534341	0.538	0.088	0	Proliferating basal cells	TRIP13
0	0.533947	0.484	0.088	0	Proliferating basal cells	HELLS
0	0.531771	0.563	0.137	0	Proliferating basal cells	KLK10
0	0.528263	0.726	0.249	0	Proliferating basal cells	ECHDC1
0	0.527745	0.641	0.184	0	Proliferating basal cells	FKBP4
0	0.526466	0.85	0.402	0	Proliferating basal cells	BLVRB
0	0.524912	0.426	0.117	0	Proliferating basal cells	ENSCHIG00000015989
0	0.524763	0.733	0.246	0	Proliferating basal cells	MBD2
0	0.520825	0.262	0.044	0	Proliferating basal cells	ENSCHIG00000004715
0	0.517057	0.572	0.128	0	Proliferating basal cells	BARX2
0	0.516437	0.358	0.01	0	Proliferating basal cells	E2F8
0	0.515508	0.744	0.274	0	Proliferating basal cells	PPA2
0	0.513813	0.85	0.379	0	Proliferating basal cells	PPA1
0	0.513508	0.725	0.253	0	Proliferating basal cells	SAE1
0	0.511777	0.608	0.168	0	Proliferating basal cells	RBBP8
0	0.509046	0.353	0.01	0	Proliferating basal cells	NEIL3
0	0.508681	0.895	0.469	0	Proliferating basal cells	RPL26L1
0	0.506264	0.876	0.465	0	Proliferating basal cells	HDAC1
0	0.50107	0.557	0.115	0	Proliferating basal cells	NUP37
0	0.50013	0.902	0.482	0	Proliferating basal cells	NDUFB3
0	0.499313	0.415	0.045	0	Proliferating basal cells	ATAD5
0	0.49918	0.352	0.013	0	Proliferating basal cells	KIF15
0	0.498617	0.693	0.241	0	Proliferating basal cells	HPF1
0	0.498453	0.317	0.013	0	Proliferating basal cells	KIF18A
0	0.497911	0.777	0.279	0	Proliferating basal cells	NET1
0	0.497601	0.673	0.184	0	Proliferating basal cells	ENSCHIG00000012557
0	0.497459	0.859	0.392	0	Proliferating basal cells	CETN3
0	0.496366	0.508	0.104	0	Proliferating basal cells	GPR87
0	0.496337	0.742	0.301	0	Proliferating basal cells	TXNDC17
0	0.492305	0.513	0.107	0	Proliferating basal cells	KLHDC8A
0	0.490185	0.926	0.5	0	Proliferating basal cells	FAM162A
0	0.489591	0.385	0.021	0	Proliferating basal cells	RAD51AP1
0	0.488827	0.841	0.411	0	Proliferating basal cells	NDUFB6
0	0.484985	0.751	0.299	0	Proliferating basal cells	CNIH4
0	0.484648	0.363	0.018	0	Proliferating basal cells	RRM2
0	0.482996	0.839	0.36	0	Proliferating basal cells	ANXA1
0	0.482825	0.758	0.308	0	Proliferating basal cells	ENSCHIG00000019373
0	0.482037	0.882	0.46	0	Proliferating basal cells	ENSCHIG00000013855
0	0.481463	0.62	0.164	0	Proliferating basal cells	FERMT1
0	0.478026	0.731	0.248	0	Proliferating basal cells	GATM
0	0.476974	0.579	0.17	0	Proliferating basal cells	TMEM97
0	0.476836	0.484	0.099	0	Proliferating basal cells	DBF4
0	0.475402	0.598	0.154	0	Proliferating basal cells	RFC3
0	0.472443	0.43	0.103	0	Proliferating basal cells	CKAP5
0	0.472323	0.855	0.444	0	Proliferating basal cells	ENSCHIG00000015525
0	0.470659	0.671	0.239	0	Proliferating basal cells	DECR1
0	0.467765	0.47	0.086	0	Proliferating basal cells	BRI3BP
0	0.464895	0.284	0.01	0	Proliferating basal cells	KIF14
0	0.464394	0.52	0.121	0	Proliferating basal cells	ENSCHIG00000012239
0	0.462141	0.528	0.107	0	Proliferating basal cells	RNASEH2A
0	0.461919	0.62	0.198	0	Proliferating basal cells	IL1RAP
0	0.461865	0.494	0.105	0	Proliferating basal cells	LSR
0	0.460776	0.666	0.211	0	Proliferating basal cells	TIAM1
0	0.459752	0.619	0.172	0	Proliferating basal cells	AK2
0	0.459082	0.36	0.067	0	Proliferating basal cells	TRIM59
0	0.458793	0.645	0.221	0	Proliferating basal cells	ENSCHIG00000013780
0	0.458211	1	0.991	0	Proliferating basal cells	RPS5
0	0.455377	0.334	0.069	0	Proliferating basal cells	ENSCHIG00000015607
0	0.454264	0.633	0.19	0	Proliferating basal cells	CSAD
0	0.452339	0.466	0.108	0	Proliferating basal cells	LMO1
0	0.447902	0.651	0.233	0	Proliferating basal cells	HYI
0	0.446529	0.456	0.112	0	Proliferating basal cells	ENSCHIG00000022816
0	0.44648	0.998	0.984	0	Proliferating basal cells	RPLP2
0	0.44623	0.69	0.218	0	Proliferating basal cells	JAG2
0	0.442811	0.445	0.07	0	Proliferating basal cells	BARD1
0	0.438054	0.272	0.019	0	Proliferating basal cells	TROAP
0	0.438031	0.71	0.283	0	Proliferating basal cells	DHRS7
0	0.436748	0.74	0.276	0	Proliferating basal cells	ALDH7A1
0	0.435928	0.396	0.078	0	Proliferating basal cells	ADGRV1
0	0.435546	0.353	0.057	0	Proliferating basal cells	HIST1H1C
0	0.435118	0.279	0.014	0	Proliferating basal cells	ENSCHIG00000009758
0	0.433097	0.597	0.17	0	Proliferating basal cells	MTHFD1
0	0.432077	0.935	0.531	0	Proliferating basal cells	ETHE1
0	0.431232	0.563	0.139	0	Proliferating basal cells	ACTL6A
0	0.428798	1	0.991	0	Proliferating basal cells	RPS9
0	0.427744	0.315	0.011	0	Proliferating basal cells	ENSCHIG00000013296
0	0.426734	1	0.998	0	Proliferating basal cells	ENSCHIG00000020368
0	0.426656	0.63	0.209	0	Proliferating basal cells	H2AFJ
0	0.425783	0.369	0.056	0	Proliferating basal cells	BRCA2
0	0.425507	0.414	0.044	0	Proliferating basal cells	TEX30
0	0.42487	0.713	0.247	0	Proliferating basal cells	DDR1
0	0.422842	0.687	0.255	0	Proliferating basal cells	B9D1
0	0.422098	0.591	0.173	0	Proliferating basal cells	MVK
0	0.421627	0.749	0.249	0	Proliferating basal cells	LYPD2
0	0.420889	0.348	0.025	0	Proliferating basal cells	ZWILCH
0	0.418953	0.504	0.127	0	Proliferating basal cells	SERTAD4
0	0.418429	0.49	0.13	0	Proliferating basal cells	ENSCHIG00000013677
0	0.417442	0.357	0.068	0	Proliferating basal cells	HIST1H1D
0	0.416047	0.715	0.252	0	Proliferating basal cells	KRT7
0	0.412284	0.363	0.091	0	Proliferating basal cells	H1F0
0	0.409843	0.293	0.055	0	Proliferating basal cells	WIF1
0	0.408969	0.699	0.225	0	Proliferating basal cells	ANK3
0	0.407856	0.577	0.17	0	Proliferating basal cells	2022-03-02
0	0.407758	0.461	0.101	0	Proliferating basal cells	IL20RB
0	0.407565	0.497	0.123	0	Proliferating basal cells	BCL11B
0	0.406776	0.287	0.01	0	Proliferating basal cells	DEPDC1B
0	0.406006	0.456	0.098	0	Proliferating basal cells	ENSCHIG00000023669
0	0.401044	0.576	0.19	0	Proliferating basal cells	ENSCHIG00000016601
0	0.398564	0.384	0.048	0	Proliferating basal cells	CENPH
0	0.396377	0.48	0.119	0	Proliferating basal cells	SYTL1
0	0.395292	0.676	0.226	0	Proliferating basal cells	F11R
0	0.393657	0.62	0.224	0	Proliferating basal cells	HOXC4
0	0.392064	0.426	0.132	0	Proliferating basal cells	OSGIN1
0	0.391492	0.344	0.074	0	Proliferating basal cells	HIST1H1E
0	0.384133	0.785	0.352	0	Proliferating basal cells	ABHD11
0	0.383857	0.365	0.055	0	Proliferating basal cells	SPDL1
0	0.382647	0.524	0.157	0	Proliferating basal cells	DHDDS
0	0.380803	0.58	0.211	0	Proliferating basal cells	ANP32E
0	0.379608	0.432	0.085	0	Proliferating basal cells	CPO
0	0.378283	0.404	0.073	0	Proliferating basal cells	TNNI1
0	0.377959	0.584	0.175	0	Proliferating basal cells	PKIA
0	0.374154	0.41	0.094	0	Proliferating basal cells	IRX5
0	0.372669	0.55	0.19	0	Proliferating basal cells	DNMT1
0	0.372222	0.695	0.279	0	Proliferating basal cells	SNRNP25
0	0.371997	0.256	0.015	0	Proliferating basal cells	ENSCHIG00000024266
0	0.369773	0.66	0.214	0	Proliferating basal cells	TNNI3
0	0.369322	0.478	0.119	0	Proliferating basal cells	BOLA3
0	0.369116	0.627	0.218	0	Proliferating basal cells	ECM1
0	0.368646	0.269	0.008	0	Proliferating basal cells	KIF2C
0	0.367138	0.293	0.014	0	Proliferating basal cells	PARPBP
0	0.36544	0.344	0.045	0	Proliferating basal cells	CHEK2
0	0.365115	1	0.987	0	Proliferating basal cells	ENSCHIG00000008256
0	0.360717	0.671	0.268	0	Proliferating basal cells	CD109
0	0.360557	0.7	0.285	0	Proliferating basal cells	CDC34
0	0.359755	0.23	0.01	0	Proliferating basal cells	ENSCHIG00000022967
0	0.356147	0.259	0.009	0	Proliferating basal cells	CDK1
0	0.3553	0.644	0.249	0	Proliferating basal cells	TOMM40
0	0.355146	0.542	0.181	0	Proliferating basal cells	ENSCHIG00000006508
0	0.354551	0.571	0.199	0	Proliferating basal cells	RPP21
0	0.352409	0.386	0.072	0	Proliferating basal cells	DNAJC9
0	0.349998	0.347	0.055	0	Proliferating basal cells	GINS1
0	0.348874	0.729	0.303	0	Proliferating basal cells	CFAP70
0	0.348864	0.297	0.025	0	Proliferating basal cells	ENSCHIG00000015569
0	0.348531	0.552	0.153	0	Proliferating basal cells	BMP7
0	0.347837	0.642	0.239	0	Proliferating basal cells	ENSCHIG00000006955
0	0.34648	0.353	0.052	0	Proliferating basal cells	CEP44
0	0.346364	0.283	0.02	0	Proliferating basal cells	CEP72
0	0.345515	0.393	0.068	0	Proliferating basal cells	METTL26
0	0.345304	0.251	0.012	0	Proliferating basal cells	ENSCHIG00000009676
0	0.343571	0.545	0.166	0	Proliferating basal cells	NCAPH2
0	0.342157	0.682	0.283	0	Proliferating basal cells	NDUFA10
0	0.34074	0.353	0.076	0	Proliferating basal cells	FAM83B
0	0.340201	0.468	0.125	0	Proliferating basal cells	PPARG
0	0.339238	0.362	0.071	0	Proliferating basal cells	PCNA
0	0.338887	0.231	0.009	0	Proliferating basal cells	CDKN3
0	0.335856	0.549	0.178	0	Proliferating basal cells	SUZ12
0	0.33578	0.306	0.06	0	Proliferating basal cells	PRSS22
0	0.335673	0.466	0.13	0	Proliferating basal cells	IL20RA
0	0.335102	0.73	0.319	0	Proliferating basal cells	MRPL39
0	0.334443	0.67	0.274	0	Proliferating basal cells	NDUFA5
0	0.332945	0.7	0.291	0	Proliferating basal cells	SNRPD1
0	0.33241	0.49	0.134	0	Proliferating basal cells	PPP1R14C
0	0.33211	0.248	0.011	0	Proliferating basal cells	ENSCHIG00000023965
0	0.330843	0.532	0.166	0	Proliferating basal cells	CBX5
0	0.330769	0.332	0.055	0	Proliferating basal cells	CENPJ
0	0.330143	0.425	0.139	0	Proliferating basal cells	IL1R2
0	0.328953	0.327	0.055	0	Proliferating basal cells	POLD1
0	0.328461	0.578	0.197	0	Proliferating basal cells	MTCH2
0	0.327566	0.221	0.024	0	Proliferating basal cells	ENSCHIG00000023173
0	0.327398	0.317	0.051	0	Proliferating basal cells	CGAS
0	0.326562	0.296	0.047	0	Proliferating basal cells	GNMT
0	0.325404	0.654	0.25	0	Proliferating basal cells	NUDT21
0	0.324585	0.279	0.058	0	Proliferating basal cells	CLDN4
0	0.324236	0.663	0.253	0	Proliferating basal cells	ENSCHIG00000021753
0	0.323491	0.453	0.117	0	Proliferating basal cells	PARD6G
0	0.323295	0.546	0.164	0	Proliferating basal cells	MCUR1
0	0.322918	0.32	0.049	0	Proliferating basal cells	WDR76
0	0.322696	0.453	0.111	0	Proliferating basal cells	C12orf65
0	0.32258	0.387	0.079	0	Proliferating basal cells	ENSCHIG00000024736
0	0.322329	0.589	0.222	0	Proliferating basal cells	C21orf91
0	0.321857	0.278	0.012	0	Proliferating basal cells	CENPT
0	0.320128	0.513	0.154	0	Proliferating basal cells	AJUBA
0	0.319609	0.607	0.228	0	Proliferating basal cells	HINT2
0	0.319532	0.534	0.158	0	Proliferating basal cells	TPD52
0	0.317849	0.43	0.142	0	Proliferating basal cells	S100A8
0	0.317162	0.391	0.097	0	Proliferating basal cells	PROM2
0	0.316135	0.543	0.186	0	Proliferating basal cells	MACROD1
0	0.315718	0.316	0.041	0	Proliferating basal cells	MCM10
0	0.315589	0.552	0.152	0	Proliferating basal cells	ENSCHIG00000025683
0	0.314591	0.22	0.011	0	Proliferating basal cells	UBE2C
0	0.313946	0.392	0.092	0	Proliferating basal cells	EZH2
0	0.313684	0.235	0.009	0	Proliferating basal cells	E2F2
0	0.312566	0.32	0.061	0	Proliferating basal cells	EPCAM
0	0.31198	0.417	0.11	0	Proliferating basal cells	CCDC18
0	0.311591	0.29	0.043	0	Proliferating basal cells	DMRT2
0	0.30855	0.563	0.184	0	Proliferating basal cells	PHF10
0	0.308455	0.358	0.077	0	Proliferating basal cells	CDK5RAP2
0	0.308364	0.449	0.121	0	Proliferating basal cells	MPZL2
0	0.306893	0.397	0.095	0	Proliferating basal cells	SLC27A3
0	0.305289	0.541	0.18	0	Proliferating basal cells	ENSCHIG00000020840
0	0.304691	0.543	0.183	0	Proliferating basal cells	ENSCHIG00000024134
0	0.303162	0.481	0.133	0	Proliferating basal cells	PDZK1IP1
0	0.303102	0.194	0.006	0	Proliferating basal cells	DEPDC1
0	0.302765	0.24	0.041	0	Proliferating basal cells	ENSCHIG00000019438
0	0.302296	0.259	0.026	0	Proliferating basal cells	ORC1
0	0.300576	0.495	0.147	0	Proliferating basal cells	FZD6
0	0.299919	0.407	0.091	0	Proliferating basal cells	OR51E1
0	0.299503	0.295	0.027	0	Proliferating basal cells	SKA1
0	0.299163	0.269	0.026	0	Proliferating basal cells	PKMYT1
0	0.2987	0.366	0.073	0	Proliferating basal cells	UBE2T
0	0.298478	0.621	0.23	0	Proliferating basal cells	ENSCHIG00000002051
0	0.296718	0.6	0.23	0	Proliferating basal cells	ENSCHIG00000025587
0	0.294712	0.381	0.096	0	Proliferating basal cells	WNT10A
0	0.293716	0.567	0.19	0	Proliferating basal cells	ENSCHIG00000026655
0	0.293233	0.459	0.122	0	Proliferating basal cells	WDR34
0	0.290511	0.318	0.046	0	Proliferating basal cells	NCAPD3
0	0.290329	0.638	0.255	0	Proliferating basal cells	ALG14
0	0.28858	0.227	0.012	0	Proliferating basal cells	INCENP
0	0.287937	0.219	0.009	0	Proliferating basal cells	ENSCHIG00000007534
0	0.287656	0.278	0.029	0	Proliferating basal cells	CKS2
0	0.286668	0.483	0.15	0	Proliferating basal cells	NECTIN1
0	0.285611	0.35	0.096	0	Proliferating basal cells	ENTPD5
0	0.284725	0.366	0.075	0	Proliferating basal cells	AAAS
0	0.284708	0.635	0.247	0	Proliferating basal cells	PIGL
0	0.28261	0.298	0.062	0	Proliferating basal cells	EXPH5
0	0.282382	0.338	0.081	0	Proliferating basal cells	SH3RF2
0	0.282	0.317	0.048	0	Proliferating basal cells	VRK1
0	0.279716	0.262	0.01	0	Proliferating basal cells	OIP5
0	0.279125	0.229	0.008	0	Proliferating basal cells	ENSCHIG00000026661
0	0.278465	0.436	0.124	0	Proliferating basal cells	CELSR2
0	0.278301	0.265	0.025	0	Proliferating basal cells	POLE2
0	0.275278	0.211	0.012	0	Proliferating basal cells	ENSCHIG00000006730
0	0.274626	0.542	0.189	0	Proliferating basal cells	PKP4
0	0.273006	0.264	0.053	0	Proliferating basal cells	LMO7
0	0.270058	0.478	0.142	0	Proliferating basal cells	HSCB
0	0.268497	0.336	0.078	0	Proliferating basal cells	CYP2S1
0	0.268482	0.517	0.167	0	Proliferating basal cells	PSMD5
0	0.267067	0.27	0.052	0	Proliferating basal cells	ENSCHIG00000025376
0	0.266414	0.207	0.013	0	Proliferating basal cells	BRCA1
0	0.265345	0.298	0.053	0	Proliferating basal cells	CEP70
0	0.264699	0.579	0.211	0	Proliferating basal cells	ENSCHIG00000024135
0	0.262999	0.419	0.135	0	Proliferating basal cells	THOC6
0	0.262126	0.353	0.088	0	Proliferating basal cells	ZMYM1
0	0.260621	0.223	0.026	0	Proliferating basal cells	RHBDL3
0	0.260205	0.404	0.117	0	Proliferating basal cells	ENSCHIG00000022632
0	0.259242	0.486	0.156	0	Proliferating basal cells	ENSCHIG00000026996
0	0.258296	0.2	0.018	0	Proliferating basal cells	POLQ
0	0.257393	0.349	0.089	0	Proliferating basal cells	ABHD6
0	0.255879	0.389	0.109	0	Proliferating basal cells	HDGF
0	0.255686	0.232	0.023	0	Proliferating basal cells	BLM
0	0.255502	0.335	0.085	0	Proliferating basal cells	ENSCHIG00000005122
0	0.255017	0.386	0.104	0	Proliferating basal cells	CEP57
0	0.25455	0.374	0.106	0	Proliferating basal cells	ACVR1B
0	0.251395	0.438	0.145	0	Proliferating basal cells	ANKRD13A
2.39048e-307	0.368024	0.752	0.333	4.76136e-303	Proliferating basal cells	DBI
1.31316e-303	0.539943	0.91	0.545	2.61555e-299	Proliferating basal cells	ENSCHIG00000009874
8.77545e-303	0.401899	0.805	0.381	1.7479e-298	Proliferating basal cells	UQCC2
1.44652e-301	0.612715	0.973	0.752	2.88118e-297	Proliferating basal cells	MGST3
1.57608e-301	0.309045	0.558	0.211	3.13923e-297	Proliferating basal cells	SMARCC1
4.1536e-300	0.348209	0.655	0.276	8.27315e-296	Proliferating basal cells	ENSCHIG00000010289
2.44121e-299	0.332592	0.764	0.34	4.8624e-295	Proliferating basal cells	NAA38
4.85945e-297	0.301867	0.645	0.264	9.67906e-293	Proliferating basal cells	CADM1
6.10948e-296	0.54613	0.949	0.636	1.21689e-291	Proliferating basal cells	ENSCHIG00000013644
6.11174e-296	0.383718	0.999	0.986	1.21734e-291	Proliferating basal cells	ENSCHIG00000012200
1.825e-294	0.290822	0.598	0.238	3.63504e-290	Proliferating basal cells	UCHL3
9.24331e-293	0.382665	0.752	0.344	1.84108e-288	Proliferating basal cells	VPS36
4.21648e-292	0.399427	0.898	0.446	8.39838e-288	Proliferating basal cells	SYNE2
3.9408e-291	0.27571	0.568	0.219	7.84929e-287	Proliferating basal cells	PDS5A
2.07025e-290	0.3205	0.751	0.334	4.12352e-286	Proliferating basal cells	ACSF2
5.79095e-288	0.467525	0.813	0.415	1.15344e-283	Proliferating basal cells	ENSCHIG00000009892
2.9392e-287	0.387743	0.835	0.413	5.85431e-283	Proliferating basal cells	ENSCHIG00000015198
5.1611e-287	0.332613	1	0.998	1.02799e-282	Proliferating basal cells	ENSCHIG00000010546
2.23666e-283	0.250296	0.299	0.086	4.45499e-279	Proliferating basal cells	SPIDR
2.89466e-283	0.380369	0.844	0.408	5.76558e-279	Proliferating basal cells	OCIAD2
2.77719e-282	0.526712	0.882	0.499	5.53161e-278	Proliferating basal cells	NASP
7.24293e-282	0.462905	0.901	0.514	1.44265e-277	Proliferating basal cells	UQCRQ
8.42279e-281	0.447163	0.85	0.448	1.67765e-276	Proliferating basal cells	NDUFV1
1.44891e-279	0.500772	0.933	0.588	2.88593e-275	Proliferating basal cells	ENSCHIG00000013325
1.58638e-279	0.439451	0.99	0.885	3.15974e-275	Proliferating basal cells	RPS17
2.15265e-279	0.445196	0.905	0.503	4.28764e-275	Proliferating basal cells	ENSCHIG00000015732
1.52907e-278	0.318457	0.744	0.339	3.04561e-274	Proliferating basal cells	ENSCHIG00000024013
2.15846e-278	0.269629	0.671	0.285	4.29922e-274	Proliferating basal cells	UBAC1
4.67522e-278	0.331174	0.765	0.347	9.31211e-274	Proliferating basal cells	COMMD4
4.63362e-272	0.336516	0.999	0.991	9.22925e-268	Proliferating basal cells	RPS19
1.23472e-271	0.419002	0.883	0.48	2.45931e-267	Proliferating basal cells	LSM7
2.81762e-271	0.453904	0.509	0.201	5.61213e-267	Proliferating basal cells	ENSCHIG00000025848
2.38857e-269	0.558059	0.919	0.595	4.75754e-265	Proliferating basal cells	NME2
1.65572e-267	0.27938	0.642	0.274	3.29787e-263	Proliferating basal cells	PPM1G
2.50691e-267	0.283133	0.687	0.3	4.99327e-263	Proliferating basal cells	ENSCHIG00000015849
5.00634e-263	0.296075	0.782	0.36	9.97163e-259	Proliferating basal cells	AKR1A1
9.28397e-263	0.275062	0.725	0.324	1.84918e-258	Proliferating basal cells	ENSCHIG00000022989
5.92574e-262	0.405589	0.879	0.477	1.18029e-257	Proliferating basal cells	ACAA2
1.38438e-260	0.32214	0.778	0.369	2.7574e-256	Proliferating basal cells	RBM8A
5.97877e-260	0.265234	0.654	0.28	1.19085e-255	Proliferating basal cells	ACAT1
7.04885e-260	0.389027	0.855	0.459	1.40399e-255	Proliferating basal cells	NDUFAB1
2.87971e-259	0.29482	0.731	0.335	5.7358e-255	Proliferating basal cells	ENSCHIG00000019082
1.58318e-258	0.271881	0.697	0.308	3.15338e-254	Proliferating basal cells	FH
8.17737e-258	0.376954	0.829	0.426	1.62877e-253	Proliferating basal cells	ENSCHIG00000025054
2.22077e-257	0.462352	0.923	0.578	4.42334e-253	Proliferating basal cells	TRAPPC5
1.42165e-255	0.320674	0.748	0.354	2.83164e-251	Proliferating basal cells	TKT
1.949e-255	0.282173	0.633	0.27	3.88201e-251	Proliferating basal cells	DST
8.12312e-255	0.365196	1	0.993	1.61796e-250	Proliferating basal cells	RPLP0
5.99926e-254	0.262968	0.718	0.318	1.19493e-249	Proliferating basal cells	COA1
6.33514e-254	0.304306	0.484	0.19	1.26183e-249	Proliferating basal cells	STK38L
1.50949e-253	0.411925	0.87	0.476	3.0066e-249	Proliferating basal cells	PRDX5
2.33427e-251	0.345499	0.998	0.983	4.6494e-247	Proliferating basal cells	ENSCHIG00000023017
8.42453e-249	0.408141	0.844	0.445	1.678e-244	Proliferating basal cells	ENSCHIG00000026323
3.56531e-247	0.261115	0.244	0.069	7.10139e-243	Proliferating basal cells	ITPKC
2.17563e-245	0.418713	0.995	0.904	4.33342e-241	Proliferating basal cells	HNRNPA2B1
4.47643e-242	0.435425	0.94	0.623	8.91616e-238	Proliferating basal cells	HSPE1
2.19719e-240	0.512308	0.852	0.484	4.37636e-236	Proliferating basal cells	ENSCHIG00000015417
5.80784e-237	0.275535	0.71	0.329	1.15681e-232	Proliferating basal cells	MRPL11
3.84832e-236	0.465663	0.905	0.56	7.66507e-232	Proliferating basal cells	FBL
1.02706e-234	0.706123	0.821	0.457	2.04571e-230	Proliferating basal cells	ETS2
1.00823e-233	0.982749	0.226	0.064	2.00819e-229	Proliferating basal cells	CCL20
7.28237e-231	0.330246	0.816	0.423	1.4505e-226	Proliferating basal cells	ENSCHIG00000014572
1.09314e-230	0.276569	0.872	0.462	2.17731e-226	Proliferating basal cells	IDI1
1.42504e-230	0.36215	0.998	0.972	2.83839e-226	Proliferating basal cells	ENSCHIG00000010409
2.21179e-229	0.262493	0.425	0.163	4.40544e-225	Proliferating basal cells	RNF19B
8.26758e-229	0.329921	1	0.994	1.64674e-224	Proliferating basal cells	ENSCHIG00000022194
9.89418e-229	0.276183	0.831	0.421	1.97072e-224	Proliferating basal cells	EZR
1.93156e-228	0.280967	0.738	0.355	3.84728e-224	Proliferating basal cells	NDUFA9
2.11562e-228	0.405287	0.966	0.673	4.21389e-224	Proliferating basal cells	SRSF7
7.21396e-227	0.260006	0.306	0.1	1.43688e-222	Proliferating basal cells	GPRC5A
5.554e-226	0.353877	0.866	0.477	1.10625e-221	Proliferating basal cells	MKKS
2.02806e-225	0.335875	0.861	0.46	4.03949e-221	Proliferating basal cells	NDUFB9
6.46394e-224	0.261806	0.777	0.38	1.28749e-219	Proliferating basal cells	ENSCHIG00000007021
4.21906e-222	0.286432	0.358	0.13	8.40352e-218	Proliferating basal cells	HBEGF
7.90001e-221	0.459294	0.989	0.859	1.57352e-216	Proliferating basal cells	ENSCHIG00000019835
3.73116e-220	0.364329	0.889	0.51	7.43173e-216	Proliferating basal cells	ENSCHIG00000021213
1.01188e-218	0.352969	0.995	0.962	2.01546e-214	Proliferating basal cells	ENSCHIG00000014599
4.08607e-218	0.374448	0.888	0.516	8.13863e-214	Proliferating basal cells	TCP1
4.16202e-215	0.409972	0.94	0.634	8.2899e-211	Proliferating basal cells	COX6B1
2.66095e-214	0.285719	0.801	0.41	5.30008e-210	Proliferating basal cells	ENSCHIG00000009187
7.62722e-212	0.32966	1	0.985	1.51919e-207	Proliferating basal cells	RPS20
1.15292e-210	0.286842	0.799	0.411	2.29639e-206	Proliferating basal cells	ENSCHIG00000009104
6.44609e-208	0.31262	0.853	0.473	1.28393e-203	Proliferating basal cells	MRPS23
5.34671e-207	0.254111	0.292	0.099	1.06496e-202	Proliferating basal cells	SAMD9
9.92068e-199	0.360758	0.936	0.601	1.976e-194	Proliferating basal cells	H2AFY
1.33857e-198	0.33798	0.897	0.52	2.66616e-194	Proliferating basal cells	PTBP1
8.96001e-198	0.263152	0.803	0.422	1.78466e-193	Proliferating basal cells	AHSA1
1.57704e-197	0.359303	0.801	0.437	3.14114e-193	Proliferating basal cells	ENSCHIG00000021306
4.43449e-193	0.278523	0.697	0.347	8.83262e-189	Proliferating basal cells	CLIC1
1.4224e-192	0.32812	0.988	0.729	2.83313e-188	Proliferating basal cells	CD9
1.06043e-189	0.308309	0.887	0.517	2.11217e-185	Proliferating basal cells	PDCD5
4.76947e-186	0.293452	0.998	0.979	9.49983e-182	Proliferating basal cells	RPS11
2.78874e-184	0.289645	0.833	0.462	5.5546e-180	Proliferating basal cells	NDUFS7
1.39219e-182	0.254785	0.998	0.99	2.77297e-178	Proliferating basal cells	RPS23
1.85237e-179	0.41464	0.899	0.574	3.68954e-175	Proliferating basal cells	ENSCHIG00000016881
5.64758e-179	0.312847	0.854	0.5	1.12488e-174	Proliferating basal cells	ENSCHIG00000015681
4.55793e-177	0.346299	0.948	0.661	9.07848e-173	Proliferating basal cells	ATP5IF1
5.38549e-176	0.37105	0.96	0.754	1.07268e-171	Proliferating basal cells	ENSCHIG00000010079
1.81071e-175	0.301121	0.878	0.526	3.60658e-171	Proliferating basal cells	IMPDH2
7.81402e-175	0.311048	0.883	0.51	1.5564e-170	Proliferating basal cells	ENSCHIG00000017227
1.88214e-174	0.406584	0.958	0.737	3.74884e-170	Proliferating basal cells	GPX1
1.0658e-171	0.270327	1	0.985	2.12286e-167	Proliferating basal cells	RPS10
5.0997e-168	0.33574	0.992	0.898	1.01576e-163	Proliferating basal cells	ENSCHIG00000001441
5.71719e-168	0.387984	0.92	0.637	1.13875e-163	Proliferating basal cells	MDH2
3.14135e-167	0.261813	0.145	0.037	6.25695e-163	Proliferating basal cells	ENSCHIG00000017096
7.93682e-166	0.405485	0.965	0.759	1.58086e-161	Proliferating basal cells	ENSCHIG00000018041
1.13017e-163	0.255027	0.799	0.441	2.25108e-159	Proliferating basal cells	HNRNPD
5.65622e-160	0.31656	0.902	0.564	1.12661e-155	Proliferating basal cells	VDAC1
1.28124e-157	0.282962	0.997	0.957	2.55197e-153	Proliferating basal cells	ENSCHIG00000012342
1.32832e-157	0.322749	0.956	0.703	2.64576e-153	Proliferating basal cells	ENSCHIG00000021771
2.18353e-154	0.314551	0.928	0.628	4.34916e-150	Proliferating basal cells	ENSCHIG00000016010
5.41675e-150	0.390023	0.975	0.845	1.07891e-145	Proliferating basal cells	ENSCHIG00000010444
1.18605e-149	0.29722	0.99	0.907	2.36237e-145	Proliferating basal cells	ENSCHIG00000013611
2.94045e-147	0.311506	0.95	0.716	5.85679e-143	Proliferating basal cells	ENSCHIG00000018678
5.24688e-147	0.308528	0.992	0.894	1.04507e-142	Proliferating basal cells	ENSCHIG00000022487
3.51667e-145	0.330843	0.935	0.651	7.00451e-141	Proliferating basal cells	ENSCHIG00000014708
3.14066e-142	0.51082	0.379	0.181	6.25556e-138	Proliferating basal cells	ENSCHIG00000025067
1.25289e-136	0.261711	0.994	0.937	2.4955e-132	Proliferating basal cells	RPL21
1.62199e-136	0.294936	0.91	0.608	3.23068e-132	Proliferating basal cells	NDUFS6
6.62912e-135	0.283528	0.914	0.609	1.32039e-130	Proliferating basal cells	ENSCHIG00000013308
1.04855e-134	0.267667	0.905	0.585	2.08851e-130	Proliferating basal cells	ENSCHIG00000024981
1.56011e-133	0.27166	0.937	0.645	3.10742e-129	Proliferating basal cells	NDUFB10
3.44075e-133	0.327013	0.955	0.725	6.85328e-129	Proliferating basal cells	ATP5PB
1.42461e-129	0.268232	0.86	0.542	2.83753e-125	Proliferating basal cells	GHITM
5.04146e-128	0.299319	0.963	0.752	1.00416e-123	Proliferating basal cells	EIF3K
8.67139e-128	0.280236	0.954	0.73	1.72717e-123	Proliferating basal cells	PSMA7
5.14195e-127	0.283865	0.962	0.73	1.02417e-122	Proliferating basal cells	ENSCHIG00000026001
6.36162e-116	0.252022	0.906	0.627	1.26711e-111	Proliferating basal cells	ATP5F1C
1.22887e-113	0.265867	0.945	0.695	2.44767e-109	Proliferating basal cells	NDUFA13
2.083e-112	0.260046	0.987	0.856	4.14892e-108	Proliferating basal cells	ENSCHIG00000012421
8.53183e-111	0.446621	0.994	0.902	1.69937e-106	Proliferating basal cells	CALM2
1.68428e-86	0.457876	0.323	0.167	3.35476e-82	Proliferating basal cells	ADM
4.089e-71	0.274195	1	0.983	8.14447e-67	Proliferating basal cells	ACTG1
9.87714e-68	0.306207	0.246	0.123	1.96733e-63	Proliferating basal cells	KRT8
0	2.40883	0.727	0.077	0	Basal cells_KRT8 high	KRT8
0	2.2439	0.986	0.488	0	Basal cells_KRT8 high	IGFBP2
0	1.91551	0.877	0.212	0	Basal cells_KRT8 high	KRT7
0	1.79652	0.945	0.535	0	Basal cells_KRT8 high	IGFBP6
0	1.50226	0.71	0.119	0	Basal cells_KRT8 high	ENSCHIG00000015151
0	1.35769	0.922	0.28	0	Basal cells_KRT8 high	KRT15
0	1.34229	0.706	0.174	0	Basal cells_KRT8 high	SOX2
0	1.33704	0.849	0.296	0	Basal cells_KRT8 high	KLF5
0	1.24757	0.687	0.3	0	Basal cells_KRT8 high	CA3
0	1.20327	0.687	0.172	0	Basal cells_KRT8 high	IRX3
0	1.11891	0.725	0.265	0	Basal cells_KRT8 high	S100A4
0	1.11532	0.52	0.069	0	Basal cells_KRT8 high	ARHGEF19
0	1.10485	0.693	0.238	0	Basal cells_KRT8 high	CADM1
0	1.09688	0.561	0.303	0	Basal cells_KRT8 high	KRT14
0	1.08897	0.789	0.28	0	Basal cells_KRT8 high	C4orf48
0	1.05722	0.589	0.189	0	Basal cells_KRT8 high	DSP
0	1.02594	0.757	0.36	0	Basal cells_KRT8 high	KRT17
0	1.02506	0.708	0.235	0	Basal cells_KRT8 high	FGFR2
0	1.01715	0.948	0.506	0	Basal cells_KRT8 high	S100A2
0	1.00159	0.619	0.164	0	Basal cells_KRT8 high	TFAP2A
0	0.974129	0.598	0.313	0	Basal cells_KRT8 high	BHLHE40
0	0.961479	0.709	0.274	0	Basal cells_KRT8 high	HSPB8
0	0.940813	0.572	0.141	0	Basal cells_KRT8 high	FERMT1
0	0.905232	0.938	0.841	0	Basal cells_KRT8 high	ENSCHIG00000010444
0	0.885519	0.448	0.089	0	Basal cells_KRT8 high	KLHDC8A
0	0.864766	0.63	0.196	0	Basal cells_KRT8 high	JAG2
0	0.843594	0.67	0.214	0	Basal cells_KRT8 high	TMPRSS11A
0	0.840578	0.541	0.154	0	Basal cells_KRT8 high	COL17A1
0	0.835592	0.374	0.067	0	Basal cells_KRT8 high	ENSCHIG00000005122
0	0.816389	0.4	0.043	0	Basal cells_KRT8 high	ENSCHIG00000023628
0	0.811535	0.457	0.105	0	Basal cells_KRT8 high	BCL11B
0	0.767295	0.606	0.229	0	Basal cells_KRT8 high	DDR1
0	0.761337	0.505	0.134	0	Basal cells_KRT8 high	AJUBA
0	0.759842	0.626	0.238	0	Basal cells_KRT8 high	KRT19
0	0.758906	0.567	0.165	0	Basal cells_KRT8 high	HSD17B2
0	0.753127	0.613	0.233	0	Basal cells_KRT8 high	PDLIM4
0	0.740073	0.552	0.207	0	Basal cells_KRT8 high	HOXC4
0	0.731718	0.735	0.346	0	Basal cells_KRT8 high	ISYNA1
0	0.72056	0.565	0.237	0	Basal cells_KRT8 high	ENSCHIG00000024885
0	0.719882	0.587	0.206	0	Basal cells_KRT8 high	ANK3
0	0.713341	0.232	0.094	0	Basal cells_KRT8 high	GPRC5A
0	0.713291	0.978	0.957	0	Basal cells_KRT8 high	ENSCHIG00000013646
0	0.687672	0.902	0.407	0	Basal cells_KRT8 high	ENSCHIG00000023823
0	0.684739	0.369	0.044	0	Basal cells_KRT8 high	TOX3
0	0.68275	0.391	0.077	0	Basal cells_KRT8 high	IRX5
0	0.670714	0.701	0.335	0	Basal cells_KRT8 high	DHRS3
0	0.666228	0.365	0.155	0	Basal cells_KRT8 high	ENSCHIG00000021894
0	0.665139	0.994	0.986	0	Basal cells_KRT8 high	ENSCHIG00000012200
0	0.664812	0.513	0.197	0	Basal cells_KRT8 high	TIAM1
0	0.659468	0.891	0.433	0	Basal cells_KRT8 high	ENSCHIG00000018247
0	0.648892	0.763	0.475	0	Basal cells_KRT8 high	ENSCHIG00000010553
0	0.645398	0.886	0.624	0	Basal cells_KRT8 high	S100A11
0	0.641798	0.948	0.857	0	Basal cells_KRT8 high	ENSCHIG00000005203
0	0.625253	0.601	0.231	0	Basal cells_KRT8 high	GATM
0	0.62353	0.378	0.08	0	Basal cells_KRT8 high	WNT10A
0	0.620166	0.754	0.287	0	Basal cells_KRT8 high	PDGFA
0	0.618347	0.521	0.23	0	Basal cells_KRT8 high	TUT4
0	0.617296	0.512	0.218	0	Basal cells_KRT8 high	N4BP2
0	0.616397	0.459	0.141	0	Basal cells_KRT8 high	SERINC2
0	0.611978	0.862	0.482	0	Basal cells_KRT8 high	PITX1
0	0.611941	0.546	0.234	0	Basal cells_KRT8 high	MRTFB
0	0.597953	0.912	0.762	0	Basal cells_KRT8 high	ENSCHIG00000010369
0	0.593226	0.268	0.048	0	Basal cells_KRT8 high	PRSS22
0	0.59269	0.398	0.137	0	Basal cells_KRT8 high	NECTIN1
0	0.582911	0.433	0.113	0	Basal cells_KRT8 high	BARX2
0	0.57993	0.504	0.195	0	Basal cells_KRT8 high	CHD3
0	0.577121	0.538	0.255	0	Basal cells_KRT8 high	CD109
0	0.569324	0.245	0.018	0	Basal cells_KRT8 high	FOXA2
0	0.567955	0.691	0.278	0	Basal cells_KRT8 high	ENSCHIG00000025317
0	0.563104	0.817	0.406	0	Basal cells_KRT8 high	IGFBP5
0	0.562824	0.951	0.857	0	Basal cells_KRT8 high	ENSCHIG00000011371
0	0.562182	0.998	0.998	0	Basal cells_KRT8 high	ENSCHIG00000020368
0	0.561174	0.997	0.995	0	Basal cells_KRT8 high	RPL32
0	0.558545	0.645	0.325	0	Basal cells_KRT8 high	AES
0	0.556772	0.991	0.985	0	Basal cells_KRT8 high	RPS20
0	0.555458	0.972	0.82	0	Basal cells_KRT8 high	ND5
0	0.55481	0.995	0.991	0	Basal cells_KRT8 high	RPS19
0	0.552305	0.988	0.97	0	Basal cells_KRT8 high	ENSCHIG00000014348
0	0.552173	0.447	0.166	0	Basal cells_KRT8 high	SEMA3F
0	0.551089	0.995	0.989	0	Basal cells_KRT8 high	RPL26
0	0.550483	0.393	0.104	0	Basal cells_KRT8 high	CRISPLD1
0	0.550335	0.994	0.989	0	Basal cells_KRT8 high	ENSCHIG00000022493
0	0.542171	0.435	0.149	0	Basal cells_KRT8 high	DIPK1C
0	0.538944	0.99	0.977	0	Basal cells_KRT8 high	ENSCHIG00000025454
0	0.537701	0.992	0.982	0	Basal cells_KRT8 high	ENSCHIG00000023211
0	0.532913	0.606	0.301	0	Basal cells_KRT8 high	PHF14
0	0.531866	0.573	0.295	0	Basal cells_KRT8 high	ZNF292
0	0.530558	0.456	0.167	0	Basal cells_KRT8 high	RNF149
0	0.529434	0.984	0.968	0	Basal cells_KRT8 high	ENSCHIG00000014701
0	0.526027	0.475	0.196	0	Basal cells_KRT8 high	MLLT3
0	0.521193	0.418	0.157	0	Basal cells_KRT8 high	RBBP8
0	0.520038	0.325	0.095	0	Basal cells_KRT8 high	ACVR1B
0	0.515855	0.321	0.105	0	Basal cells_KRT8 high	EGFR
0	0.511486	0.993	0.99	0	Basal cells_KRT8 high	ENSCHIG00000013243
0	0.510154	0.995	0.989	0	Basal cells_KRT8 high	RPL37
0	0.51015	0.996	0.993	0	Basal cells_KRT8 high	RPS7
0	0.509981	0.475	0.204	0	Basal cells_KRT8 high	AFDN
0	0.508195	0.988	0.978	0	Basal cells_KRT8 high	ENSCHIG00000024561
0	0.507997	0.237	0.02	0	Basal cells_KRT8 high	NCMAP
0	0.497534	0.958	0.902	0	Basal cells_KRT8 high	EEF1D
0	0.496535	0.988	0.971	0	Basal cells_KRT8 high	RACK1
0	0.494177	0.857	0.602	0	Basal cells_KRT8 high	ENSCHIG00000019224
0	0.49356	0.403	0.153	0	Basal cells_KRT8 high	CEP290
0	0.491989	0.997	0.994	0	Basal cells_KRT8 high	ENSCHIG00000018150
0	0.485214	0.701	0.397	0	Basal cells_KRT8 high	ARID5B
0	0.4845	0.516	0.213	0	Basal cells_KRT8 high	F11R
0	0.482776	0.429	0.168	0	Basal cells_KRT8 high	FAM126A
0	0.480338	0.976	0.956	0	Basal cells_KRT8 high	ENSCHIG00000012342
0	0.48012	0.233	0.045	0	Basal cells_KRT8 high	MAB21L4
0	0.47923	0.234	0.037	0	Basal cells_KRT8 high	FAM184A
0	0.479054	0.992	0.989	0	Basal cells_KRT8 high	ENSCHIG00000020543
0	0.478493	0.98	0.973	0	Basal cells_KRT8 high	ENSCHIG00000013811
0	0.475578	0.331	0.096	0	Basal cells_KRT8 high	LSR
0	0.473939	0.395	0.142	0	Basal cells_KRT8 high	PRRG4
0	0.471751	0.961	0.912	0	Basal cells_KRT8 high	ENSCHIG00000015380
0	0.471093	0.629	0.332	0	Basal cells_KRT8 high	MEIS1
0	0.470544	0.638	0.332	0	Basal cells_KRT8 high	CLIC1
0	0.468885	0.608	0.312	0	Basal cells_KRT8 high	CD82
0	0.468617	0.292	0.069	0	Basal cells_KRT8 high	ENSCHIG00000014161
0	0.46569	0.323	0.096	0	Basal cells_KRT8 high	FHDC1
0	0.463722	0.261	0.051	0	Basal cells_KRT8 high	EPCAM
0	0.461469	0.506	0.201	0	Basal cells_KRT8 high	TNNI3
0	0.45822	0.992	0.987	0	Basal cells_KRT8 high	ENSCHIG00000008256
0	0.457751	0.321	0.118	0	Basal cells_KRT8 high	FAM83D
0	0.457669	0.991	0.988	0	Basal cells_KRT8 high	ENSCHIG00000015166
0	0.45341	0.471	0.218	0	Basal cells_KRT8 high	GALNT7
0	0.452781	0.985	0.972	0	Basal cells_KRT8 high	ENSCHIG00000010409
0	0.452709	0.995	0.991	0	Basal cells_KRT8 high	RPS9
0	0.451933	0.993	0.991	0	Basal cells_KRT8 high	RPS5
0	0.449123	0.269	0.087	0	Basal cells_KRT8 high	ENSCHIG00000005230
0	0.444991	0.997	0.994	0	Basal cells_KRT8 high	ENSCHIG00000022194
0	0.444562	0.158	0.024	0	Basal cells_KRT8 high	EDN2
0	0.44389	0.327	0.095	0	Basal cells_KRT8 high	GPR87
0	0.441347	0.657	0.386	0	Basal cells_KRT8 high	CAT
0	0.440326	0.994	0.989	0	Basal cells_KRT8 high	RPS18
0	0.439698	0.993	0.991	0	Basal cells_KRT8 high	RPS14
0	0.437413	0.994	0.991	0	Basal cells_KRT8 high	ENSCHIG00000003945
0	0.436852	0.378	0.155	0	Basal cells_KRT8 high	OXR1
0	0.435293	0.291	0.086	0	Basal cells_KRT8 high	DLK2
0	0.433974	0.187	0.045	0	Basal cells_KRT8 high	SHH
0	0.425913	0.915	0.814	0	Basal cells_KRT8 high	ENSCHIG00000003580
0	0.420096	0.958	0.891	0	Basal cells_KRT8 high	ENSCHIG00000022487
0	0.419993	0.267	0.096	0	Basal cells_KRT8 high	SUGP2
0	0.419328	0.999	0.998	0	Basal cells_KRT8 high	ENSCHIG00000010546
0	0.41813	0.376	0.15	0	Basal cells_KRT8 high	ACP5
0	0.415861	0.992	0.985	0	Basal cells_KRT8 high	RPS10
0	0.414308	0.986	0.983	0	Basal cells_KRT8 high	ENSCHIG00000023017
0	0.412762	0.213	0.036	0	Basal cells_KRT8 high	DSG2
0	0.412703	0.301	0.117	0	Basal cells_KRT8 high	CELSR2
0	0.412506	0.318	0.115	0	Basal cells_KRT8 high	KIAA1217
0	0.41222	0.383	0.176	0	Basal cells_KRT8 high	RNPC3
0	0.41119	0.989	0.978	0	Basal cells_KRT8 high	ENSCHIG00000017781
0	0.410566	0.19	0.035	0	Basal cells_KRT8 high	ENSCHIG00000011757
0	0.410375	0.988	0.979	0	Basal cells_KRT8 high	RPL10A
0	0.410064	0.993	0.993	0	Basal cells_KRT8 high	RPLP0
0	0.40961	0.955	0.908	0	Basal cells_KRT8 high	ENSCHIG00000009267
0	0.409064	0.632	0.398	0	Basal cells_KRT8 high	ACIN1
0	0.406404	0.963	0.946	0	Basal cells_KRT8 high	ENSCHIG00000004124
0	0.404994	0.367	0.111	0	Basal cells_KRT8 high	NCS1
0	0.404155	0.405	0.176	0	Basal cells_KRT8 high	ZNF444
0	0.403312	0.99	0.983	0	Basal cells_KRT8 high	ENSCHIG00000011416
0	0.402583	0.286	0.098	0	Basal cells_KRT8 high	ESRP1
0	0.402343	0.25	0.067	0	Basal cells_KRT8 high	PATZ1
0	0.40215	0.328	0.112	0	Basal cells_KRT8 high	KCNK1
0	0.394938	0.988	0.979	0	Basal cells_KRT8 high	RPS11
0	0.394675	0.984	0.965	0	Basal cells_KRT8 high	ENSCHIG00000007926
0	0.394058	0.996	0.993	0	Basal cells_KRT8 high	ENSCHIG00000023850
0	0.391104	0.423	0.202	0	Basal cells_KRT8 high	SMARCC1
0	0.389971	0.788	0.51	0	Basal cells_KRT8 high	ENSCHIG00000018248
0	0.389305	0.242	0.081	0	Basal cells_KRT8 high	QSOX2
0	0.388696	0.2	0.018	0	Basal cells_KRT8 high	IRX6
0	0.388564	0.245	0.039	0	Basal cells_KRT8 high	ELF5
0	0.384444	0.487	0.262	0	Basal cells_KRT8 high	PPIP5K2
0	0.384331	0.236	0.076	0	Basal cells_KRT8 high	DSG3
0	0.383026	0.283	0.085	0	Basal cells_KRT8 high	CXADR
0	0.382943	0.974	0.942	0	Basal cells_KRT8 high	RPS28
0	0.382161	0.39	0.184	0	Basal cells_KRT8 high	CSAD
0	0.38212	0.993	0.99	0	Basal cells_KRT8 high	UBA52
0	0.381649	0.499	0.252	0	Basal cells_KRT8 high	GIPC1
0	0.381284	0.244	0.067	0	Basal cells_KRT8 high	SOX6
0	0.380603	0.274	0.087	0	Basal cells_KRT8 high	SPINT1
0	0.380159	0.504	0.224	0	Basal cells_KRT8 high	PLTP
0	0.380155	0.237	0.045	0	Basal cells_KRT8 high	VSNL1
0	0.379619	0.84	0.678	0	Basal cells_KRT8 high	ENSCHIG00000020447
0	0.379345	0.229	0.042	0	Basal cells_KRT8 high	ENSCHIG00000025376
0	0.378661	0.397	0.18	0	Basal cells_KRT8 high	PKP4
0	0.376125	0.957	0.881	0	Basal cells_KRT8 high	RPS17
0	0.37599	0.296	0.09	0	Basal cells_KRT8 high	ZBTB7C
0	0.375633	0.282	0.076	0	Basal cells_KRT8 high	SEMA3D
0	0.373814	0.276	0.078	0	Basal cells_KRT8 high	CPO
0	0.373254	0.999	0.988	0	Basal cells_KRT8 high	ND4
0	0.373225	0.855	0.678	0	Basal cells_KRT8 high	PSMG4
0	0.373129	0.993	0.988	0	Basal cells_KRT8 high	RPS13
0	0.373125	0.644	0.413	0	Basal cells_KRT8 high	EZR
0	0.373086	0.2	0.048	0	Basal cells_KRT8 high	EVPL
0	0.37186	0.364	0.129	0	Basal cells_KRT8 high	KLK10
0	0.371178	0.308	0.1	0	Basal cells_KRT8 high	ZBED5
0	0.369311	0.546	0.197	0	Basal cells_KRT8 high	KRT5
0	0.3682	0.703	0.467	0	Basal cells_KRT8 high	SRSF4
0	0.368025	0.371	0.135	0	Basal cells_KRT8 high	TNFRSF21
0	0.366591	0.639	0.37	0	Basal cells_KRT8 high	UQCC2
0	0.366512	0.238	0.04	0	Basal cells_KRT8 high	REC8
0	0.365773	0.983	0.973	0	Basal cells_KRT8 high	ENSCHIG00000011680
0	0.364467	0.396	0.167	0	Basal cells_KRT8 high	PKIA
0	0.363272	0.481	0.251	0	Basal cells_KRT8 high	ENSCHIG00000018199
0	0.362263	0.374	0.145	0	Basal cells_KRT8 high	BMP7
0	0.360208	0.996	0.994	0	Basal cells_KRT8 high	ENSCHIG00000015149
0	0.354684	0.261	0.093	0	Basal cells_KRT8 high	SEMA4B
0	0.35437	0.294	0.087	0	Basal cells_KRT8 high	STARD10
0	0.35377	0.801	0.576	0	Basal cells_KRT8 high	PNISR
0	0.352695	0.486	0.246	0	Basal cells_KRT8 high	RIMKLB
0	0.352271	0.996	0.992	0	Basal cells_KRT8 high	ENSCHIG00000016076
0	0.351438	0.992	0.988	0	Basal cells_KRT8 high	ENSCHIG00000025540
0	0.349845	0.993	0.99	0	Basal cells_KRT8 high	RPS23
0	0.349248	0.305	0.116	0	Basal cells_KRT8 high	CHD7
0	0.348596	0.814	0.594	0	Basal cells_KRT8 high	PNN
0	0.345519	0.941	0.866	0	Basal cells_KRT8 high	ENSCHIG00000016478
0	0.344351	0.225	0.042	0	Basal cells_KRT8 high	BEGAIN
0	0.344003	0.797	0.591	0	Basal cells_KRT8 high	MED21
0	0.342919	0.86	0.586	0	Basal cells_KRT8 high	CD44
0	0.340895	0.982	0.974	0	Basal cells_KRT8 high	RPSA
0	0.340436	0.319	0.113	0	Basal cells_KRT8 high	MPZL2
0	0.339932	0.241	0.078	0	Basal cells_KRT8 high	NOXA1
0	0.339024	0.491	0.278	0	Basal cells_KRT8 high	GCC2
0	0.335802	0.486	0.246	0	Basal cells_KRT8 high	ENSCHIG00000020660
0	0.333812	0.985	0.877	0	Basal cells_KRT8 high	ND3
0	0.333608	0.216	0.056	0	Basal cells_KRT8 high	ELMO3
0	0.333487	0.276	0.098	0	Basal cells_KRT8 high	SMARCAD1
0	0.333385	0.561	0.263	0	Basal cells_KRT8 high	ANXA3
0	0.33027	0.603	0.351	0	Basal cells_KRT8 high	NUDT14
0	0.329514	0.537	0.301	0	Basal cells_KRT8 high	CAPN1
0	0.32911	0.984	0.962	0	Basal cells_KRT8 high	ENSCHIG00000021732
0	0.327537	0.353	0.176	0	Basal cells_KRT8 high	NOP53
0	0.326447	0.997	0.994	0	Basal cells_KRT8 high	ENSCHIG00000016445
0	0.324683	0.468	0.233	0	Basal cells_KRT8 high	EDN3
0	0.323391	0.435	0.223	0	Basal cells_KRT8 high	CHD6
0	0.321297	0.329	0.126	0	Basal cells_KRT8 high	PPP1R14C
0	0.319308	0.992	0.991	0	Basal cells_KRT8 high	ENSCHIG00000019403
0	0.312327	0.431	0.223	0	Basal cells_KRT8 high	TTYH3
0	0.310501	0.226	0.037	0	Basal cells_KRT8 high	WFDC2
0	0.310224	0.626	0.366	0	Basal cells_KRT8 high	WLS
0	0.309431	0.288	0.111	0	Basal cells_KRT8 high	PARD6G
0	0.308934	0.25	0.085	0	Basal cells_KRT8 high	ZNRF3
0	0.308848	0.165	0.025	0	Basal cells_KRT8 high	ASTN2
0	0.308449	0.208	0.06	0	Basal cells_KRT8 high	LAMA3
0	0.307027	0.43	0.232	0	Basal cells_KRT8 high	ENSCHIG00000006955
0	0.306194	0.202	0.039	0	Basal cells_KRT8 high	TMEM108
0	0.305937	0.281	0.126	0	Basal cells_KRT8 high	IL20RA
0	0.305918	0.302	0.096	0	Basal cells_KRT8 high	SOX9
0	0.304871	0.279	0.122	0	Basal cells_KRT8 high	RNF44
0	0.304597	0.425	0.184	0	Basal cells_KRT8 high	CLCA2
0	0.303143	0.186	0.028	0	Basal cells_KRT8 high	ENSCHIG00000016541
0	0.30288	0.25	0.092	0	Basal cells_KRT8 high	ALDH4A1
0	0.301898	0.519	0.288	0	Basal cells_KRT8 high	DNLZ
0	0.301412	0.15	0.03	0	Basal cells_KRT8 high	EML5
0	0.301237	0.981	0.966	0	Basal cells_KRT8 high	RPL27
0	0.300135	0.23	0.068	0	Basal cells_KRT8 high	TNNI1
0	0.298044	0.702	0.428	0	Basal cells_KRT8 high	PAFAH1B3
0	0.295415	0.454	0.246	0	Basal cells_KRT8 high	ENSCHIG00000021753
0	0.293134	0.995	0.993	0	Basal cells_KRT8 high	ENSCHIG00000025646
0	0.292945	0.187	0.04	0	Basal cells_KRT8 high	SLFNL1
0	0.29189	0.99	0.987	0	Basal cells_KRT8 high	ENSCHIG00000016945
0	0.290998	0.199	0.031	0	Basal cells_KRT8 high	PGLYRP1
0	0.28995	0.302	0.118	0	Basal cells_KRT8 high	KRTCAP3
0	0.289499	0.246	0.09	0	Basal cells_KRT8 high	PACRGL
0	0.287832	0.339	0.156	0	Basal cells_KRT8 high	RALGPS2
0	0.285033	0.974	0.935	0	Basal cells_KRT8 high	RPL21
0	0.284131	0.33	0.146	0	Basal cells_KRT8 high	TCEA3
0	0.284118	0.208	0.066	0	Basal cells_KRT8 high	SEMA3A
0	0.28405	0.295	0.044	0	Basal cells_KRT8 high	ENSCHIG00000026725
0	0.281999	0.96	0.926	0	Basal cells_KRT8 high	EEF1B2
0	0.28177	0.204	0.038	0	Basal cells_KRT8 high	MIOX
0	0.280057	0.707	0.435	0	Basal cells_KRT8 high	SYNE2
0	0.279716	0.131	0.006	0	Basal cells_KRT8 high	ENSCHIG00000005049
0	0.279287	0.941	0.87	0	Basal cells_KRT8 high	ENSCHIG00000026897
0	0.279058	0.394	0.178	0	Basal cells_KRT8 high	ENSCHIG00000012557
0	0.278853	0.202	0.042	0	Basal cells_KRT8 high	TPPP2
0	0.277263	0.993	0.989	0	Basal cells_KRT8 high	RPL19
0	0.277242	0.215	0.073	0	Basal cells_KRT8 high	CYP2S1
0	0.27565	0.481	0.247	0	Basal cells_KRT8 high	FAM241B
0	0.274137	0.318	0.141	0	Basal cells_KRT8 high	FZD6
0	0.272956	0.37	0.194	0	Basal cells_KRT8 high	IL1RAP
0	0.272742	0.627	0.386	0	Basal cells_KRT8 high	ENSCHIG00000025428
0	0.272212	0.384	0.165	0	Basal cells_KRT8 high	FAM49B
0	0.271364	0.237	0.073	0	Basal cells_KRT8 high	ENSCHIG00000024736
0	0.270534	0.197	0.049	0	Basal cells_KRT8 high	BAIAP2L1
0	0.270236	0.316	0.149	0	Basal cells_KRT8 high	TANC1
0	0.269073	0.262	0.087	0	Basal cells_KRT8 high	TMEFF1
0	0.268626	0.27	0.07	0	Basal cells_KRT8 high	NDRG4
0	0.268383	0.149	0.02	0	Basal cells_KRT8 high	EMB
0	0.267216	0.327	0.143	0	Basal cells_KRT8 high	MAP9
0	0.261879	0.968	0.943	0	Basal cells_KRT8 high	ENSCHIG00000017446
0	0.261222	0.171	0.059	0	Basal cells_KRT8 high	EXPH5
0	0.26096	0.179	0.043	0	Basal cells_KRT8 high	ACVR2B
0	0.260325	0.203	0.078	0	Basal cells_KRT8 high	FOXP4
0	0.259986	0.14	0.035	0	Basal cells_KRT8 high	MAP7
0	0.259551	0.256	0.088	0	Basal cells_KRT8 high	KIAA1671
0	0.258875	0.496	0.262	0	Basal cells_KRT8 high	NDRG2
0	0.257742	0.181	0.033	0	Basal cells_KRT8 high	SNX10
0	0.257384	0.479	0.273	0	Basal cells_KRT8 high	CNDP2
0	0.257142	0.996	0.994	0	Basal cells_KRT8 high	ENSCHIG00000000315
0	0.256633	0.203	0.069	0	Basal cells_KRT8 high	CD164L2
0	0.256493	0.215	0.082	0	Basal cells_KRT8 high	NAALADL2
0	0.255774	0.256	0.112	0	Basal cells_KRT8 high	AFF1
0	0.252146	0.266	0.102	0	Basal cells_KRT8 high	FAIM
0	0.251309	0.334	0.149	0	Basal cells_KRT8 high	HCFC1R1
0	0.25043	0.358	0.18	0	Basal cells_KRT8 high	ENSCHIG00000011932
0	0.250154	0.622	0.336	0	Basal cells_KRT8 high	AHCY
1.64883e-306	0.291436	0.915	0.774	3.28414e-302	Basal cells_KRT8 high	ENSCHIG00000009937
4.02928e-299	0.268325	0.325	0.166	8.02552e-295	Basal cells_KRT8 high	SETX
9.88796e-293	0.293976	0.17	0.067	1.96948e-288	Basal cells_KRT8 high	LARGE2
2.00468e-291	0.349741	0.687	0.466	3.99291e-287	Basal cells_KRT8 high	TGIF1
6.44231e-291	0.300878	0.412	0.23	1.28318e-286	Basal cells_KRT8 high	TNRC6A
1.6161e-287	0.285417	0.287	0.142	3.21894e-283	Basal cells_KRT8 high	TCF20
3.10492e-283	0.260892	0.37	0.199	6.18438e-279	Basal cells_KRT8 high	SHPRH
1.59345e-280	0.276277	0.87	0.75	3.17383e-276	Basal cells_KRT8 high	EIF3H
4.99577e-280	0.289034	0.43	0.248	9.95058e-276	Basal cells_KRT8 high	ZNF395
8.94202e-277	0.274451	0.747	0.539	1.78107e-272	Basal cells_KRT8 high	ENSCHIG00000012272
4.89856e-271	0.303861	0.484	0.289	9.75695e-267	Basal cells_KRT8 high	TNRC18
1.19934e-268	0.304609	0.32	0.167	2.38884e-264	Basal cells_KRT8 high	DLG5
2.32437e-268	0.270389	0.748	0.553	4.62968e-264	Basal cells_KRT8 high	FBL
9.93768e-267	0.286327	0.727	0.506	1.97939e-262	Basal cells_KRT8 high	LUC7L3
2.0105e-264	0.29431	0.959	0.895	4.00452e-260	Basal cells_KRT8 high	ENSCHIG00000001441
2.81668e-258	0.260702	0.721	0.519	5.61026e-254	Basal cells_KRT8 high	IMPDH2
3.01936e-249	0.282935	0.46	0.275	6.01395e-245	Basal cells_KRT8 high	RBM26
4.10487e-249	0.261665	0.242	0.12	8.17607e-245	Basal cells_KRT8 high	ENSCHIG00000012239
3.91809e-244	0.279183	0.588	0.384	7.80405e-240	Basal cells_KRT8 high	NKTR
5.69494e-237	0.26457	0.424	0.251	1.13432e-232	Basal cells_KRT8 high	LENG8
4.83646e-222	0.268881	0.935	0.854	9.63326e-218	Basal cells_KRT8 high	ENSCHIG00000016885
1.76042e-211	0.252505	0.399	0.24	3.5064e-207	Basal cells_KRT8 high	EPS8L2
1.55192e-204	0.280733	0.652	0.458	3.09111e-200	Basal cells_KRT8 high	ARGLU1
5.85735e-191	0.338179	0.998	0.948	1.16667e-186	Basal cells_KRT8 high	ATP6
2.43596e-136	0.278502	0.263	0.161	4.85194e-132	Basal cells_KRT8 high	RNF19B
9.01756e-130	0.526566	0.657	0.538	1.79612e-125	Basal cells_KRT8 high	MYC
1.91044e-121	0.292132	0.946	0.852	3.80522e-117	Basal cells_KRT8 high	ENSCHIG00000012421
2.92746e-115	0.291808	0.607	0.453	5.83091e-111	Basal cells_KRT8 high	ETS2
1.5432e-109	0.262523	0.989	0.983	3.07375e-105	Basal cells_KRT8 high	ACTG1
9.58603e-76	0.257911	0.996	0.978	1.90935e-71	Basal cells_KRT8 high	ENSCHIG00000000004
0	2.03738	0.937	0.301	0	Basal cells_CA3 high	CA3
0	1.88538	0.791	0.313	0	Basal cells_CA3 high	BHLHE40
0	1.88054	0.994	0.418	0	Basal cells_CA3 high	ENSCHIG00000023823
0	1.84179	0.933	0.365	0	Basal cells_CA3 high	KRT17
0	1.8339	0.98	0.307	0	Basal cells_CA3 high	ENSCHIG00000021113
0	1.81331	0.981	0.358	0	Basal cells_CA3 high	ALDH1A1
0	1.76941	0.836	0.113	0	Basal cells_CA3 high	IL1R2
0	1.75964	0.994	0.443	0	Basal cells_CA3 high	ENSCHIG00000018247
0	1.75051	0.965	0.278	0	Basal cells_CA3 high	ENSCHIG00000025317
0	1.68283	0.983	0.313	0	Basal cells_CA3 high	DAPL1
0	1.65283	0.979	0.321	0	Basal cells_CA3 high	TST
0	1.54293	0.991	0.518	0	Basal cells_CA3 high	S100A2
0	1.50825	0.983	0.509	0	Basal cells_CA3 high	CMBL
0	1.46594	0.941	0.745	0	Basal cells_CA3 high	ZFP36
0	1.44071	0.915	0.31	0	Basal cells_CA3 high	KLF5
0	1.3976	0.257	0.058	0	Basal cells_CA3 high	CCL20
0	1.37178	0.993	0.503	0	Basal cells_CA3 high	IGFBP2
0	1.29663	0.557	0.153	0	Basal cells_CA3 high	ENSCHIG00000021894
0	1.222	0.712	0.23	0	Basal cells_CA3 high	UACA
0	1.1942	0.479	0.127	0	Basal cells_CA3 high	CLDN1
0	1.17897	0.787	0.449	0	Basal cells_CA3 high	ETS2
0	1.16403	0.777	0.182	0	Basal cells_CA3 high	SERPINB10
0	1.1489	0.779	0.226	0	Basal cells_CA3 high	EDN3
0	1.1298	0.883	0.296	0	Basal cells_CA3 high	KRT14
0	1.12116	0.747	0.166	0	Basal cells_CA3 high	HS3ST6
0	1.07889	0.698	0.159	0	Basal cells_CA3 high	COL17A1
0	1.03716	0.858	0.568	0	Basal cells_CA3 high	GADD45B
0	1.03173	0.491	0.111	0	Basal cells_CA3 high	KCNK1
0	1.03013	0.911	0.303	0	Basal cells_CA3 high	ENSCHIG00000000097
0	1.02168	0.835	0.317	0	Basal cells_CA3 high	ATP1B1
0	1.01836	0.689	0.184	0	Basal cells_CA3 high	IL1RAP
0	1.00957	0.547	0.063	0	Basal cells_CA3 high	ADGRV1
0	1.00033	0.774	0.247	0	Basal cells_CA3 high	FGFR2
0	0.983537	0.728	0.2	0	Basal cells_CA3 high	KRT5
0	0.950082	0.926	0.3	0	Basal cells_CA3 high	KRT15
0	0.949896	0.748	0.239	0	Basal cells_CA3 high	KRT7
0	0.949616	0.546	0.119	0	Basal cells_CA3 high	OSGIN1
0	0.928133	0.423	0.043	0	Basal cells_CA3 high	WIF1
0	0.904674	0.807	0.234	0	Basal cells_CA3 high	LYPD2
0	0.894091	0.896	0.32	0	Basal cells_CA3 high	TPMT
0	0.887232	0.814	0.43	0	Basal cells_CA3 high	NFKBIA
0	0.864995	0.731	0.203	0	Basal cells_CA3 high	ECM1
0	0.864827	0.756	0.225	0	Basal cells_CA3 high	TMPRSS11A
0	0.858265	0.696	0.21	0	Basal cells_CA3 high	GSR
0	0.857891	0.545	0.139	0	Basal cells_CA3 high	EHF
0	0.857307	1	0.991	0	Basal cells_CA3 high	RPS9
0	0.839442	0.832	0.387	0	Basal cells_CA3 high	CAT
0	0.83892	0.44	0.106	0	Basal cells_CA3 high	ENSCHIG00000016878
0	0.834575	0.809	0.352	0	Basal cells_CA3 high	ENSCHIG00000018336
0	0.828438	0.302	0.053	0	Basal cells_CA3 high	GPNMB
0	0.826923	0.623	0.176	0	Basal cells_CA3 high	HSD17B2
0	0.82417	0.538	0.128	0	Basal cells_CA3 high	KLK10
0	0.810986	0.711	0.238	0	Basal cells_CA3 high	ECHDC1
0	0.799485	0.609	0.125	0	Basal cells_CA3 high	ENSCHIG00000015228
0	0.793566	0.614	0.15	0	Basal cells_CA3 high	DIPK1C
0	0.785579	0.689	0.41	0	Basal cells_CA3 high	RND3
0	0.778772	0.904	0.434	0	Basal cells_CA3 high	MGST1
0	0.776793	0.632	0.174	0	Basal cells_CA3 high	ENSCHIG00000012557
0	0.770436	0.713	0.287	0	Basal cells_CA3 high	HSPB8
0	0.770113	0.45	0.085	0	Basal cells_CA3 high	DLK2
0	0.762514	0.26	0.089	0	Basal cells_CA3 high	AREG
0	0.746325	0.793	0.337	0	Basal cells_CA3 high	AHCY
0	0.728996	0.696	0.273	0	Basal cells_CA3 high	DHRS7
0	0.725314	0.446	0.108	0	Basal cells_CA3 high	ENSCHIG00000015989
0	0.70286	0.564	0.157	0	Basal cells_CA3 high	MGST2
0	0.701088	0.279	0.038	0	Basal cells_CA3 high	ENSCHIG00000004715
0	0.69946	0.494	0.118	0	Basal cells_CA3 high	SERTAD4
0	0.699255	0.999	0.971	0	Basal cells_CA3 high	RACK1
0	0.698318	0.988	0.418	0	Basal cells_CA3 high	ENSCHIG00000024121
0	0.696699	0.618	0.182	0	Basal cells_CA3 high	CLCA2
0	0.689754	0.599	0.162	0	Basal cells_CA3 high	TMEM238
0	0.686883	1	0.998	0	Basal cells_CA3 high	ENSCHIG00000020368
0	0.684763	0.677	0.207	0	Basal cells_CA3 high	JAG2
0	0.684414	1	0.989	0	Basal cells_CA3 high	RPS18
0	0.681706	0.99	0.855	0	Basal cells_CA3 high	ENSCHIG00000019835
0	0.675887	0.755	0.408	0	Basal cells_CA3 high	PNRC1
0	0.675644	0.999	0.971	0	Basal cells_CA3 high	ENSCHIG00000010409
0	0.67428	0.667	0.201	0	Basal cells_CA3 high	ENSCHIG00000018489
0	0.671014	0.465	0.113	0	Basal cells_CA3 high	ENSCHIG00000012239
0	0.66884	0.596	0.202	0	Basal cells_CA3 high	DSP
0	0.668747	1	0.991	0	Basal cells_CA3 high	RPS5
0	0.665872	0.621	0.302	0	Basal cells_CA3 high	BCL3
0	0.66025	1	0.992	0	Basal cells_CA3 high	RPLP0
0	0.655469	0.845	0.386	0	Basal cells_CA3 high	CHCHD10
0	0.654758	0.637	0.25	0	Basal cells_CA3 high	KRT19
0	0.652188	0.631	0.261	0	Basal cells_CA3 high	DST
0	0.651815	0.965	0.731	0	Basal cells_CA3 high	GPX1
0	0.651316	0.605	0.193	0	Basal cells_CA3 high	IRX3
0	0.650575	0.427	0.1	0	Basal cells_CA3 high	THEM5
0	0.641819	0.999	0.982	0	Basal cells_CA3 high	ENSCHIG00000023017
0	0.64017	0.918	0.491	0	Basal cells_CA3 high	PITX1
0	0.637926	0.777	0.414	0	Basal cells_CA3 high	EZR
0	0.636062	0.945	0.775	0	Basal cells_CA3 high	JUN
0	0.634174	0.996	0.927	0	Basal cells_CA3 high	ENSCHIG00000014133
0	0.629718	0.283	0.037	0	Basal cells_CA3 high	ENSCHIG00000005556
0	0.622206	0.938	0.521	0	Basal cells_CA3 high	ETHE1
0	0.619774	0.637	0.23	0	Basal cells_CA3 high	DECR1
0	0.614805	0.999	0.978	0	Basal cells_CA3 high	RPS11
0	0.611796	0.62	0.255	0	Basal cells_CA3 high	IER3
0	0.611652	0.996	0.983	0	Basal cells_CA3 high	ACTG1
0	0.611486	0.567	0.181	0	Basal cells_CA3 high	ENSCHIG00000016601
0	0.611099	0.564	0.182	0	Basal cells_CA3 high	CSAD
0	0.609733	0.543	0.248	0	Basal cells_CA3 high	ENSCHIG00000011700
0	0.609128	0.758	0.4	0	Basal cells_CA3 high	PIM3
0	0.607267	1	0.992	0	Basal cells_CA3 high	ENSCHIG00000016076
0	0.605287	0.372	0.064	0	Basal cells_CA3 high	ENSCHIG00000007668
0	0.601215	1	0.986	0	Basal cells_CA3 high	ENSCHIG00000012200
0	0.592231	0.844	0.437	0	Basal cells_CA3 high	SYNE2
0	0.588395	0.56	0.215	0	Basal cells_CA3 high	C21orf91
0	0.587983	0.309	0.061	0	Basal cells_CA3 high	ITPKC
0	0.585476	0.706	0.337	0	Basal cells_CA3 high	PDK4
0	0.578777	0.451	0.155	0	Basal cells_CA3 high	RNF19B
0	0.577487	0.791	0.512	0	Basal cells_CA3 high	KLF10
0	0.576538	1	0.993	0	Basal cells_CA3 high	RPS7
0	0.57427	0.696	0.3	0	Basal cells_CA3 high	ENSCHIG00000019373
0	0.573844	1	0.992	0	Basal cells_CA3 high	RPL8
0	0.572809	0.937	0.618	0	Basal cells_CA3 high	ENSCHIG00000023424
0	0.570877	0.433	0.124	0	Basal cells_CA3 high	ENSCHIG00000013677
0	0.564872	0.788	0.433	0	Basal cells_CA3 high	NFKBIZ
0	0.559125	0.997	0.935	0	Basal cells_CA3 high	RPL21
0	0.543278	0.999	0.984	0	Basal cells_CA3 high	RPLP2
0	0.542941	0.569	0.197	0	Basal cells_CA3 high	SOX2
0	0.542474	0.408	0.106	0	Basal cells_CA3 high	ENSCHIG00000022816
0	0.540419	0.727	0.41	0	Basal cells_CA3 high	NDFIP2
0	0.53959	0.45	0.147	0	Basal cells_CA3 high	PRRG4
0	0.533527	0.741	0.44	0	Basal cells_CA3 high	OSER1
0	0.530334	1	0.994	0	Basal cells_CA3 high	ENSCHIG00000022194
0	0.525892	0.445	0.146	0	Basal cells_CA3 high	TCEA3
0	0.516458	0.299	0.095	0	Basal cells_CA3 high	GPRC5A
0	0.513737	0.34	0.062	0	Basal cells_CA3 high	LARGE2
0	0.507931	0.375	0.096	0	Basal cells_CA3 high	IL20RB
0	0.505269	0.675	0.411	0	Basal cells_CA3 high	CCNL1
0	0.502858	0.389	0.103	0	Basal cells_CA3 high	LMO1
0	0.499265	0.991	0.722	0	Basal cells_CA3 high	CD9
0	0.495143	0.412	0.127	0	Basal cells_CA3 high	FBP2
0	0.494098	1	0.986	0	Basal cells_CA3 high	ENSCHIG00000008256
0	0.493066	0.478	0.147	0	Basal cells_CA3 high	BMP7
0	0.489121	0.41	0.125	0	Basal cells_CA3 high	IL20RA
0	0.488406	0.664	0.323	0	Basal cells_CA3 high	ENSCHIG00000005169
0	0.481411	0.393	0.114	0	Basal cells_CA3 high	ENSCHIG00000010385
0	0.476808	0.833	0.469	0	Basal cells_CA3 high	ACAA2
0	0.476137	0.597	0.325	0	Basal cells_CA3 high	SLC20A1
0	0.476136	0.848	0.446	0	Basal cells_CA3 high	ENSCHIG00000004827
0	0.471718	0.999	0.977	0	Basal cells_CA3 high	ENSCHIG00000025454
0	0.470051	0.336	0.074	0	Basal cells_CA3 high	SH3RF2
0	0.468854	0.402	0.103	0	Basal cells_CA3 high	KLHDC8A
0	0.465626	0.438	0.165	0	Basal cells_CA3 high	RBBP8
0	0.463164	0.835	0.503	0	Basal cells_CA3 high	ENSCHIG00000017227
0	0.461605	0.998	0.961	0	Basal cells_CA3 high	ENSCHIG00000014599
0	0.460227	0.642	0.273	0	Basal cells_CA3 high	NET1
0	0.458163	0.993	0.902	0	Basal cells_CA3 high	EEF1D
0	0.456773	0.959	0.864	0	Basal cells_CA3 high	FOS
0	0.454139	0.417	0.129	0	Basal cells_CA3 high	PPP1R14C
0	0.454093	1	0.998	0	Basal cells_CA3 high	ENSCHIG00000010546
0	0.452858	1	0.991	0	Basal cells_CA3 high	RPS19
0	0.452606	0.229	0.043	0	Basal cells_CA3 high	F3
0	0.451993	0.494	0.185	0	Basal cells_CA3 high	COQ7
0	0.4499	0.588	0.262	0	Basal cells_CA3 high	CD109
0	0.44649	1	0.985	0	Basal cells_CA3 high	RPS10
0	0.445619	0.999	0.991	0	Basal cells_CA3 high	ENSCHIG00000003945
0	0.443863	0.994	0.93	0	Basal cells_CA3 high	ENSCHIG00000020581
0	0.442767	0.254	0.058	0	Basal cells_CA3 high	TNFAIP3
0	0.442512	0.923	0.607	0	Basal cells_CA3 high	ENSCHIG00000019224
0	0.440553	0.976	0.815	0	Basal cells_CA3 high	ENSCHIG00000003580
0	0.439428	0.994	0.926	0	Basal cells_CA3 high	EEF1B2
0	0.438736	0.999	0.979	0	Basal cells_CA3 high	RPL10A
0	0.437286	0.733	0.419	0	Basal cells_CA3 high	PLK2
0	0.435896	0.35	0.127	0	Basal cells_CA3 high	SOSTDC1
0	0.435846	1	0.988	0	Basal cells_CA3 high	ENSCHIG00000015166
0	0.43407	0.934	0.591	0	Basal cells_CA3 high	CD44
0	0.433157	0.392	0.109	0	Basal cells_CA3 high	ENDOG
0	0.432407	0.77	0.401	0	Basal cells_CA3 high	OCIAD2
0	0.432139	0.705	0.326	0	Basal cells_CA3 high	ACSF2
0	0.432108	0.579	0.242	0	Basal cells_CA3 high	DDR1
0	0.431684	0.999	0.984	0	Basal cells_CA3 high	ENSCHIG00000017451
0	0.431609	0.474	0.175	0	Basal cells_CA3 high	RNF149
0	0.429174	1	0.994	0	Basal cells_CA3 high	ENSCHIG00000018150
0	0.428879	0.323	0.082	0	Basal cells_CA3 high	CPO
0	0.426926	0.606	0.281	0	Basal cells_CA3 high	RASSF8
0	0.425016	0.251	0.054	0	Basal cells_CA3 high	CLDN4
0	0.423663	0.996	0.944	0	Basal cells_CA3 high	ENSCHIG00000012976
0	0.422388	0.27	0.095	0	Basal cells_CA3 high	SAMD9
0	0.420744	0.324	0.103	0	Basal cells_CA3 high	GPR87
0	0.419185	0.999	0.988	0	Basal cells_CA3 high	ENSCHIG00000025540
0	0.419155	0.992	0.921	0	Basal cells_CA3 high	ENSCHIG00000011677
0	0.41883	0.999	0.965	0	Basal cells_CA3 high	ENSCHIG00000007926
0	0.418116	0.474	0.179	0	Basal cells_CA3 high	ETFDH
0	0.415584	0.492	0.193	0	Basal cells_CA3 high	RPP21
0	0.415092	1	0.989	0	Basal cells_CA3 high	ENSCHIG00000020543
0	0.410501	0.248	0.053	0	Basal cells_CA3 high	NRG1
0	0.407757	0.496	0.184	0	Basal cells_CA3 high	TFAP2A
0	0.407542	0.374	0.115	0	Basal cells_CA3 high	SYTL1
0	0.406382	0.449	0.172	0	Basal cells_CA3 high	PKIA
0	0.405349	0.942	0.676	0	Basal cells_CA3 high	ENSCHIG00000004382
0	0.400434	0.997	0.966	0	Basal cells_CA3 high	RPL27
0	0.396243	1	0.994	0	Basal cells_CA3 high	ENSCHIG00000000315
0	0.393608	0.259	0.075	0	Basal cells_CA3 high	ENSCHIG00000023062
0	0.388367	1	0.994	0	Basal cells_CA3 high	ENSCHIG00000016445
0	0.386598	0.522	0.224	0	Basal cells_CA3 high	ENSCHIG00000025587
0	0.385393	0.438	0.161	0	Basal cells_CA3 high	FERMT1
0	0.383112	0.997	0.956	0	Basal cells_CA3 high	ENSCHIG00000012342
0	0.380518	0.991	0.912	0	Basal cells_CA3 high	ENSCHIG00000015380
0	0.380287	0.997	0.97	0	Basal cells_CA3 high	ENSCHIG00000014348
0	0.380164	0.257	0.063	0	Basal cells_CA3 high	LAMA3
0	0.378635	0.451	0.169	0	Basal cells_CA3 high	AK2
0	0.378269	0.559	0.252	0	Basal cells_CA3 high	ENSCHIG00000018563
0	0.376271	0.252	0.049	0	Basal cells_CA3 high	BMPR1B
0	0.375362	0.615	0.269	0	Basal cells_CA3 high	CDH13
0	0.37474	1	0.992	0	Basal cells_CA3 high	ENSCHIG00000025646
0	0.374226	0.525	0.234	0	Basal cells_CA3 high	LCAT
0	0.372492	0.285	0.086	0	Basal cells_CA3 high	ENSCHIG00000024179
0	0.372176	0.504	0.235	0	Basal cells_CA3 high	GADD45G
0	0.371794	0.371	0.12	0	Basal cells_CA3 high	KRTCAP3
0	0.370342	0.314	0.093	0	Basal cells_CA3 high	WNT10A
0	0.366224	0.397	0.148	0	Basal cells_CA3 high	IQGAP2
0	0.363539	0.399	0.15	0	Basal cells_CA3 high	AJUBA
0	0.360903	0.768	0.395	0	Basal cells_CA3 high	BLVRB
0	0.360264	0.335	0.121	0	Basal cells_CA3 high	CELSR2
0	0.359918	1	0.991	0	Basal cells_CA3 high	ENSCHIG00000019403
0	0.358625	0.483	0.224	0	Basal cells_CA3 high	ZC3H12A
0	0.358212	0.23	0.044	0	Basal cells_CA3 high	GNMT
0	0.356028	0.408	0.186	0	Basal cells_CA3 high	STK38L
0	0.355864	0.418	0.168	0	Basal cells_CA3 high	2022-03-02
0	0.35423	0.526	0.222	0	Basal cells_CA3 high	F11R
0	0.353051	0.231	0.045	0	Basal cells_CA3 high	GALR2
0	0.349422	0.574	0.285	0	Basal cells_CA3 high	NAXE
0	0.347247	0.587	0.297	0	Basal cells_CA3 high	DNAJC21
0	0.346578	0.462	0.186	0	Basal cells_CA3 high	ENSCHIG00000026655
0	0.343571	0.256	0.074	0	Basal cells_CA3 high	FAM83B
0	0.34168	0.428	0.176	0	Basal cells_CA3 high	REEP4
0	0.340727	0.359	0.127	0	Basal cells_CA3 high	BARX2
0	0.338137	0.655	0.355	0	Basal cells_CA3 high	AKR1A1
0	0.337986	0.65	0.35	0	Basal cells_CA3 high	ENSCHIG00000008397
0	0.337537	0.129	0.005	0	Basal cells_CA3 high	ALDH3A1
0	0.336752	0.285	0.089	0	Basal cells_CA3 high	ZNRF3
0	0.334544	0.987	0.866	0	Basal cells_CA3 high	ENSCHIG00000016478
0	0.333348	0.571	0.281	0	Basal cells_CA3 high	CDC34
0	0.333185	0.366	0.141	0	Basal cells_CA3 high	ANKRD13A
0	0.330877	0.546	0.231	0	Basal cells_CA3 high	TUBA4A
0	0.330786	0.313	0.109	0	Basal cells_CA3 high	APIP
0	0.330665	0.551	0.245	0	Basal cells_CA3 high	GATM
0	0.330539	0.737	0.417	0	Basal cells_CA3 high	SNAI2
0	0.330043	1	0.99	0	Basal cells_CA3 high	UBA52
0	0.32732	0.365	0.111	0	Basal cells_CA3 high	ENSCHIG00000011337
0	0.325242	0.997	0.943	0	Basal cells_CA3 high	ENSCHIG00000017446
0	0.325133	0.581	0.297	0	Basal cells_CA3 high	NAB1
0	0.323729	0.283	0.092	0	Basal cells_CA3 high	CXADR
0	0.323651	0.221	0.048	0	Basal cells_CA3 high	SHH
0	0.322164	0.258	0.067	0	Basal cells_CA3 high	PSTPIP2
0	0.321051	0.293	0.094	0	Basal cells_CA3 high	PROM2
0	0.320541	0.335	0.121	0	Basal cells_CA3 high	BCL11B
0	0.3192	0.199	0.053	0	Basal cells_CA3 high	MCTP2
0	0.319082	0.999	0.995	0	Basal cells_CA3 high	RPL32
0	0.317817	0.477	0.212	0	Basal cells_CA3 high	TNNI3
0	0.317486	0.973	0.746	0	Basal cells_CA3 high	MGST3
0	0.317349	0.674	0.368	0	Basal cells_CA3 high	ECH1
0	0.31645	0.475	0.224	0	Basal cells_CA3 high	SULT1C4
0	0.312027	0.712	0.357	0	Basal cells_CA3 high	SDC4
0	0.311897	0.245	0.083	0	Basal cells_CA3 high	IRF7
0	0.310738	0.6	0.309	0	Basal cells_CA3 high	HSDL2
0	0.310482	1	0.993	0	Basal cells_CA3 high	ENSCHIG00000023850
0	0.310084	0.428	0.173	0	Basal cells_CA3 high	PALMD
0	0.306301	0.562	0.275	0	Basal cells_CA3 high	ARL4A
0	0.306155	0.192	0.042	0	Basal cells_CA3 high	DMRT2
0	0.305657	0.997	0.978	0	Basal cells_CA3 high	ENSCHIG00000024561
0	0.303719	1	0.994	0	Basal cells_CA3 high	ENSCHIG00000015149
0	0.301547	0.248	0.081	0	Basal cells_CA3 high	DSG3
0	0.300428	0.295	0.088	0	Basal cells_CA3 high	OR51E1
0	0.297234	0.279	0.097	0	Basal cells_CA3 high	ZBTB7C
0	0.295585	0.651	0.347	0	Basal cells_CA3 high	ABHD11
0	0.294485	0.503	0.25	0	Basal cells_CA3 high	ZNF395
0	0.292023	0.19	0.043	0	Basal cells_CA3 high	DSC3
0	0.29098	0.998	0.982	0	Basal cells_CA3 high	ENSCHIG00000023211
0	0.288122	0.379	0.14	0	Basal cells_CA3 high	DLL1
0	0.28557	0.997	0.968	0	Basal cells_CA3 high	ENSCHIG00000014701
0	0.284652	0.389	0.129	0	Basal cells_CA3 high	PDZK1IP1
0	0.284055	0.173	0.032	0	Basal cells_CA3 high	ENTPD3
0	0.282375	0.35	0.148	0	Basal cells_CA3 high	ST3GAL1
0	0.28042	0.321	0.124	0	Basal cells_CA3 high	PPARG
0	0.280107	0.234	0.072	0	Basal cells_CA3 high	CD164L2
0	0.278965	0.298	0.113	0	Basal cells_CA3 high	PPIF
0	0.278888	0.258	0.093	0	Basal cells_CA3 high	IRX5
0	0.27639	0.999	0.984	0	Basal cells_CA3 high	RPS20
0	0.273502	0.997	0.972	0	Basal cells_CA3 high	ENSCHIG00000013811
0	0.271897	0.996	0.964	0	Basal cells_CA3 high	RPS16
0	0.271512	0.288	0.115	0	Basal cells_CA3 high	PTPN13
0	0.270412	0.196	0.051	0	Basal cells_CA3 high	HLF
0	0.267376	0.999	0.978	0	Basal cells_CA3 high	ENSCHIG00000017781
0	0.262465	0.465	0.219	0	Basal cells_CA3 high	ENSCHIG00000013780
0	0.26244	1	0.993	0	Basal cells_CA3 high	RPS27A
0	0.259932	0.302	0.12	0	Basal cells_CA3 high	MPZL2
0	0.259396	0.612	0.313	0	Basal cells_CA3 high	KLF13
0	0.259052	0.201	0.061	0	Basal cells_CA3 high	EXPH5
0	0.258005	0.352	0.145	0	Basal cells_CA3 high	FZD6
0	0.257592	0.474	0.231	0	Basal cells_CA3 high	MRPS25
0	0.256335	0.365	0.163	0	Basal cells_CA3 high	ENSCHIG00000023283
0	0.252618	0.277	0.104	0	Basal cells_CA3 high	ACVR1B
0	0.251884	1	0.99	0	Basal cells_CA3 high	ENSCHIG00000013243
8.8875e-308	0.251651	0.257	0.098	1.77021e-303	Basal cells_CA3 high	SEMA4B
2.45181e-305	0.270723	0.524	0.273	4.88351e-301	Basal cells_CA3 high	ENSCHIG00000011333
2.32579e-304	0.284312	0.997	0.962	4.6325e-300	Basal cells_CA3 high	ENSCHIG00000021732
6.79223e-302	0.252561	0.488	0.246	1.35288e-297	Basal cells_CA3 high	MBD2
6.50254e-297	0.31616	0.816	0.514	1.29518e-292	Basal cells_CA3 high	ENSCHIG00000021684
1.04596e-295	0.320196	0.986	0.892	2.08334e-291	Basal cells_CA3 high	ENSCHIG00000022487
2.50272e-295	0.517212	0.652	0.394	4.98491e-291	Basal cells_CA3 high	ATF3
3.63077e-295	1.07837	0.347	0.162	7.23177e-291	Basal cells_CA3 high	ADM
7.6613e-295	0.328522	0.984	0.854	1.52598e-290	Basal cells_CA3 high	ENSCHIG00000016885
3.82633e-290	0.465756	0.298	0.127	7.62128e-286	Basal cells_CA3 high	HBEGF
4.69493e-288	0.29002	0.741	0.449	9.35137e-284	Basal cells_CA3 high	BUD23
6.65781e-288	0.321518	0.719	0.432	1.3261e-283	Basal cells_CA3 high	UQCRC1
1.16041e-286	0.288369	0.989	0.908	2.3113e-282	Basal cells_CA3 high	ENSCHIG00000009267
2.39025e-285	0.307312	0.902	0.652	4.76089e-281	Basal cells_CA3 high	CLTB
1.5933e-277	0.287629	0.745	0.446	3.17354e-273	Basal cells_CA3 high	ENSCHIG00000013087
4.25532e-273	0.281935	0.7	0.419	8.47575e-269	Basal cells_CA3 high	ENSCHIG00000014572
2.19974e-271	0.2907	0.197	0.069	4.38144e-267	Basal cells_CA3 high	EPAS1
3.14929e-270	0.284115	0.178	0.06	6.27276e-266	Basal cells_CA3 high	PRSS22
8.01492e-270	0.306605	0.858	0.583	1.59641e-265	Basal cells_CA3 high	ENSCHIG00000013325
1.05477e-266	0.600229	0.607	0.372	2.10089e-262	Basal cells_CA3 high	TRIB1
4.5524e-264	0.407024	0.801	0.535	9.06748e-260	Basal cells_CA3 high	MYC
9.20852e-260	0.485256	0.959	0.878	1.83415e-255	Basal cells_CA3 high	UBC
2.44549e-247	0.396565	0.764	0.515	4.87092e-243	Basal cells_CA3 high	GADD45A
1.06655e-244	0.286361	0.838	0.559	2.12436e-240	Basal cells_CA3 high	VDAC1
8.41318e-238	0.253528	0.992	0.919	1.67574e-233	Basal cells_CA3 high	RPS21
1.78314e-235	0.272621	0.884	0.632	3.55166e-231	Basal cells_CA3 high	MDH2
1.01314e-216	0.263165	0.99	0.895	2.01797e-212	Basal cells_CA3 high	ENSCHIG00000001441
6.935e-212	0.263712	0.983	0.87	1.38131e-207	Basal cells_CA3 high	PABPC1
4.42217e-195	0.347981	0.617	0.402	8.80809e-191	Basal cells_CA3 high	ERRFI1
7.09133e-192	0.257176	0.984	0.858	1.41245e-187	Basal cells_CA3 high	ENSCHIG00000005203
5.7498e-186	0.291998	0.932	0.745	1.14524e-181	Basal cells_CA3 high	TXN
1.26047e-180	0.25155	0.938	0.743	2.5106e-176	Basal cells_CA3 high	EIF5
8.8729e-170	0.283228	0.804	0.577	1.76731e-165	Basal cells_CA3 high	DUSP1
7.61529e-109	0.365372	0.117	0.049	1.51681e-104	Basal cells_CA3 high	EDN1
5.16958e-44	0.419878	0.468	0.443	1.02968e-39	Basal cells_CA3 high	ENSCHIG00000012599
1.68186e-11	0.308071	0.204	0.168	3.34994e-07	Basal cells_CA3 high	CTGF
0	3.33825	1	0.418	0	Basal cells_AREG high	ENSCHIG00000024121
0	2.95228	0.643	0.071	0	Basal cells_AREG high	AREG
0	2.85083	0.899	0.157	0	Basal cells_AREG high	SELENBP1
0	2.72824	0.987	0.363	0	Basal cells_AREG high	KRT17
0	2.4328	0.895	0.239	0	Basal cells_AREG high	KRT19
0	2.27475	0.95	0.323	0	Basal cells_AREG high	TST
0	2.26794	0.628	0.036	0	Basal cells_AREG high	ENSCHIG00000020529
0	2.13722	0.848	0.194	0	Basal cells_AREG high	KRT5
0	2.09692	0.993	0.672	0	Basal cells_AREG high	ENSCHIG00000016311
0	1.92467	0.621	0.102	0	Basal cells_AREG high	HSPA6
0	1.91547	0.961	0.503	0	Basal cells_AREG high	ENSCHIG00000007355
0	1.8905	0.948	0.521	0	Basal cells_AREG high	ETHE1
0	1.8702	0.815	0.114	0	Basal cells_AREG high	IL1R2
0	1.86938	0.941	0.294	0	Basal cells_AREG high	KRT14
0	1.86217	0.921	0.303	0	Basal cells_AREG high	ENSCHIG00000000097
0	1.85355	0.777	0.091	0	Basal cells_AREG high	ENSCHIG00000016878
0	1.85102	0.86	0.304	0	Basal cells_AREG high	KRT15
0	1.83001	0.677	0.122	0	Basal cells_AREG high	ENSCHIG00000015228
0	1.81002	0.988	0.991	0	Basal cells_AREG high	COX1
0	1.78352	0.644	0.065	0	Basal cells_AREG high	ENSCHIG00000011701
0	1.77738	0.983	0.746	0	Basal cells_AREG high	MGST3
0	1.74963	0.65	0.125	0	Basal cells_AREG high	S100A8
0	1.74917	0.983	0.519	0	Basal cells_AREG high	S100A2
0	1.66653	0.516	0.195	0	Basal cells_AREG high	CRYAB
0	1.66327	0.745	0.171	0	Basal cells_AREG high	ACADS
0	1.65662	0.48	0.084	0	Basal cells_AREG high	RBP2
0	1.6441	0.864	0.283	0	Basal cells_AREG high	ENSCHIG00000025317
0	1.63312	0.618	0.15	0	Basal cells_AREG high	ENSCHIG00000021894
0	1.62317	0.787	0.36	0	Basal cells_AREG high	ENSCHIG00000019289
0	1.6	0.979	0.419	0	Basal cells_AREG high	ENSCHIG00000023823
0	1.56849	0.514	0.125	0	Basal cells_AREG high	CLDN1
0	1.5565	0.875	0.367	0	Basal cells_AREG high	PPA1
0	1.53923	0.689	0.176	0	Basal cells_AREG high	ENSCHIG00000016601
0	1.52544	0.963	0.42	0	Basal cells_AREG high	ENSCHIG00000012599
0	1.5217	0.714	0.184	0	Basal cells_AREG high	ENSCHIG00000025848
0	1.52032	0.276	0.057	0	Basal cells_AREG high	CCL20
0	1.51388	0.881	0.312	0	Basal cells_AREG high	ENSCHIG00000021113
0	1.49049	0.981	0.444	0	Basal cells_AREG high	ENSCHIG00000018247
0	1.48668	0.886	0.328	0	Basal cells_AREG high	ENSCHIG00000022058
0	1.48381	0.656	0.099	0	Basal cells_AREG high	ENSCHIG00000015989
0	1.47728	0.556	0.022	0	Basal cells_AREG high	CYP26A1
0	1.47674	0.652	0.066	0	Basal cells_AREG high	C15orf48
0	1.45648	0.933	0.512	0	Basal cells_AREG high	CMBL
0	1.44324	0.922	0.677	0	Basal cells_AREG high	ENSCHIG00000004382
0	1.43926	0.804	0.195	0	Basal cells_AREG high	ENSCHIG00000018489
0	1.43765	0.846	0.335	0	Basal cells_AREG high	AHCY
0	1.38254	0.889	0.435	0	Basal cells_AREG high	MGST1
0	1.38045	0.975	0.856	0	Basal cells_AREG high	ENSCHIG00000019835
0	1.37133	0.702	0.122	0	Basal cells_AREG high	ENSCHIG00000011868
0	1.35517	0.919	0.361	0	Basal cells_AREG high	ALDH1A1
0	1.33671	0.744	0.417	0	Basal cells_AREG high	HSPH1
0	1.32982	0.894	0.508	0	Basal cells_AREG high	ENSCHIG00000010963
0	1.29693	0.755	0.239	0	Basal cells_AREG high	HSP70.1
0	1.29441	0.777	0.216	0	Basal cells_AREG high	TSPO
0	1.26855	0.919	0.317	0	Basal cells_AREG high	DAPL1
0	1.25872	0.886	0.467	0	Basal cells_AREG high	ACAA2
0	1.23735	0.782	0.27	0	Basal cells_AREG high	DHRS7
0	1.22308	0.811	0.322	0	Basal cells_AREG high	ACSF2
0	1.20124	0.664	0.095	0	Basal cells_AREG high	ENSCHIG00000022816
0	1.19314	0.779	0.236	0	Basal cells_AREG high	LYPD2
0	1.18381	0.515	0.104	0	Basal cells_AREG high	ENSCHIG00000011337
0	1.16119	0.859	0.445	0	Basal cells_AREG high	ENSCHIG00000004827
0	1.15686	0.845	0.391	0	Basal cells_AREG high	BLVRB
0	1.13632	0.687	0.159	0	Basal cells_AREG high	AK2
0	1.13542	0.787	0.321	0	Basal cells_AREG high	GSTM3
0	1.13132	0.773	0.201	0	Basal cells_AREG high	ECM1
0	1.1294	0.614	0.117	0	Basal cells_AREG high	ENSCHIG00000019796
0	1.11629	0.541	0.016	0	Basal cells_AREG high	ENSCHIG00000002450
0	1.10304	0.983	0.989	0	Basal cells_AREG high	COX2
0	1.10254	0.674	0.177	0	Basal cells_AREG high	ENSCHIG00000019803
0	1.10047	0.635	0.115	0	Basal cells_AREG high	ENSCHIG00000013677
0	1.08815	0.847	0.322	0	Basal cells_AREG high	TPMT
0	1.08689	0.73	0.208	0	Basal cells_AREG high	GSR
0	1.07472	0.559	0.039	0	Basal cells_AREG high	TNNT3
0	1.05343	0.499	0.145	0	Basal cells_AREG high	ENSCHIG00000026143
0	1.0196	0.79	0.306	0	Basal cells_AREG high	ENSCHIG00000025853
0	1.01342	0.853	0.316	0	Basal cells_AREG high	CKB
0	1.0133	0.912	0.62	0	Basal cells_AREG high	ENSCHIG00000023424
0	1.00823	0.52	0.119	0	Basal cells_AREG high	PLIN2
0	1.00124	0.926	0.707	0	Basal cells_AREG high	ETFB
0	0.996252	0.72	0.354	0	Basal cells_AREG high	ANXA1
0	0.986204	0.808	0.428	0	Basal cells_AREG high	UQCRC1
0	0.968365	0.72	0.287	0	Basal cells_AREG high	HSPB8
0	0.962463	0.858	0.539	0	Basal cells_AREG high	ENSCHIG00000009874
0	0.944462	0.455	0.043	0	Basal cells_AREG high	ENSCHIG00000021527
0	0.941173	0.736	0.267	0	Basal cells_AREG high	ACAT1
0	0.910189	0.688	0.431	0	Basal cells_AREG high	BAG3
0	0.903331	0.851	0.314	0	Basal cells_AREG high	KLF5
0	0.902539	0.669	0.18	0	Basal cells_AREG high	CLCA2
0	0.900913	0.223	0.031	0	Basal cells_AREG high	ENSCHIG00000017096
0	0.898841	0.936	0.733	0	Basal cells_AREG high	GPX1
0	0.87571	0.264	0.019	0	Basal cells_AREG high	ENSCHIG00000013282
0	0.872468	0.789	0.441	0	Basal cells_AREG high	NDUFV1
0	0.871962	0.818	0.494	0	Basal cells_AREG high	FAM162A
0	0.868251	0.637	0.186	0	Basal cells_AREG high	ENSCHIG00000006134
0	0.866979	0.82	0.399	0	Basal cells_AREG high	OCIAD2
0	0.86541	0.592	0.119	0	Basal cells_AREG high	FBP2
0	0.861385	0.94	0.855	0	Basal cells_AREG high	EEF1A1
0	0.8608	0.58	0.122	0	Basal cells_AREG high	ENSCHIG00000025062
0	0.857571	0.936	0.763	0	Basal cells_AREG high	COX5B
0	0.856969	0.646	0.174	0	Basal cells_AREG high	ENSCHIG00000012557
0	0.854158	0.929	0.624	0	Basal cells_AREG high	ENSCHIG00000010216
0	0.842828	0.736	0.374	0	Basal cells_AREG high	CYC1
0	0.842306	0.789	0.422	0	Basal cells_AREG high	PHB2
0	0.838308	0.701	0.227	0	Basal cells_AREG high	DECR1
0	0.837977	0.889	0.646	0	Basal cells_AREG high	ENSCHIG00000014708
0	0.8272	0.884	0.632	0	Basal cells_AREG high	MDH2
0	0.821706	0.702	0.186	0	Basal cells_AREG high	SERPINB10
0	0.812423	0.254	0.039	0	Basal cells_AREG high	ENSCHIG00000004715
0	0.805369	0.641	0.175	0	Basal cells_AREG high	HSD17B2
0	0.800372	0.689	0.238	0	Basal cells_AREG high	GATM
0	0.797683	0.709	0.273	0	Basal cells_AREG high	PTGR1
0	0.793321	0.98	0.979	0	Basal cells_AREG high	ENSCHIG00000000004
0	0.792475	0.47	0.084	0	Basal cells_AREG high	ENTPD5
0	0.790295	0.659	0.232	0	Basal cells_AREG high	UACA
0	0.7824	0.611	0.154	0	Basal cells_AREG high	ENSCHIG00000016542
0	0.77594	0.793	0.456	0	Basal cells_AREG high	IDI1
0	0.774159	0.666	0.247	0	Basal cells_AREG high	ENSCHIG00000018563
0	0.768904	0.589	0.194	0	Basal cells_AREG high	CBR3
0	0.758605	0.519	0.111	0	Basal cells_AREG high	ENSCHIG00000012239
0	0.758524	0.446	0.041	0	Basal cells_AREG high	SLC14A1
0	0.745849	0.231	0.014	0	Basal cells_AREG high	HSD17B13
0	0.745732	0.332	0.026	0	Basal cells_AREG high	FGFBP1
0	0.737066	0.716	0.41	0	Basal cells_AREG high	NDFIP2
0	0.734258	0.364	0.022	0	Basal cells_AREG high	HMGCS2
0	0.725067	0.604	0.213	0	Basal cells_AREG high	ENSCHIG00000013780
0	0.713665	0.99	0.928	0	Basal cells_AREG high	ENSCHIG00000014133
0	0.706364	0.751	0.429	0	Basal cells_AREG high	ND4L
0	0.695483	0.857	0.63	0	Basal cells_AREG high	COX6B1
0	0.695027	0.573	0.15	0	Basal cells_AREG high	ADH5
0	0.68608	0.591	0.174	0	Basal cells_AREG high	ETFDH
0	0.684646	0.754	0.354	0	Basal cells_AREG high	ENSCHIG00000018336
0	0.684612	0.281	0.065	0	Basal cells_AREG high	ENSCHIG00000015607
0	0.683204	0.987	0.944	0	Basal cells_AREG high	ENSCHIG00000012976
0	0.681533	0.619	0.228	0	Basal cells_AREG high	TUBA4A
0	0.675633	0.498	0.142	0	Basal cells_AREG high	EHF
0	0.673473	0.797	0.47	0	Basal cells_AREG high	PRDX5
0	0.668576	0.645	0.27	0	Basal cells_AREG high	UQCRC2
0	0.665768	0.788	0.454	0	Basal cells_AREG high	NDUFB9
0	0.663622	0.499	0.125	0	Basal cells_AREG high	ENSCHIG00000011324
0	0.660888	0.307	0.051	0	Basal cells_AREG high	CLDN4
0	0.658879	0.615	0.325	0	Basal cells_AREG high	SLC20A1
0	0.657451	0.752	0.431	0	Basal cells_AREG high	ENSCHIG00000021306
0	0.655817	0.57	0.189	0	Basal cells_AREG high	MTCH2
0	0.655245	0.476	0.11	0	Basal cells_AREG high	ENSCHIG00000010385
0	0.654898	0.574	0.223	0	Basal cells_AREG high	ENSCHIG00000002051
0	0.654854	0.421	0.123	0	Basal cells_AREG high	S100A12
0	0.650998	0.555	0.179	0	Basal cells_AREG high	STK38L
0	0.650481	0.903	0.756	0	Basal cells_AREG high	ENSCHIG00000018041
0	0.645384	0.685	0.228	0	Basal cells_AREG high	TMPRSS11A
0	0.639726	0.329	0.042	0	Basal cells_AREG high	ENPP3
0	0.63711	0.563	0.183	0	Basal cells_AREG high	ALAS1
0	0.633151	0.398	0.027	0	Basal cells_AREG high	PCK2
0	0.630442	0.774	0.423	0	Basal cells_AREG high	S100A10
0	0.626281	0.444	0.094	0	Basal cells_AREG high	CLUH
0	0.624241	0.698	0.345	0	Basal cells_AREG high	ABHD11
0	0.620191	0.581	0.203	0	Basal cells_AREG high	DSP
0	0.615647	0.544	0.137	0	Basal cells_AREG high	VDAC2
0	0.609432	0.411	0.13	0	Basal cells_AREG high	ENSCHIG00000020673
0	0.609378	0.281	0.051	0	Basal cells_AREG high	NRG1
0	0.607926	0.708	0.388	0	Basal cells_AREG high	ENSCHIG00000022798
0	0.602404	0.6	0.226	0	Basal cells_AREG high	MRPS25
0	0.600022	0.849	0.659	0	Basal cells_AREG high	ATP5IF1
0	0.592887	0.761	0.457	0	Basal cells_AREG high	NDUFS7
0	0.591771	0.799	0.554	0	Basal cells_AREG high	ENSCHIG00000026106
0	0.58886	0.5	0.145	0	Basal cells_AREG high	ENSCHIG00000025683
0	0.588587	0.545	0.158	0	Basal cells_AREG high	MGST2
0	0.587744	0.538	0.13	0	Basal cells_AREG high	SOD1
0	0.583185	0.808	0.439	0	Basal cells_AREG high	SYNE2
0	0.574682	0.624	0.255	0	Basal cells_AREG high	UQCRFS1
0	0.568817	0.388	0.033	0	Basal cells_AREG high	ENSCHIG00000023248
0	0.567046	0.828	0.559	0	Basal cells_AREG high	VDAC1
0	0.561727	0.953	0.724	0	Basal cells_AREG high	CD9
0	0.561458	0.485	0.121	0	Basal cells_AREG high	IL20RA
0	0.558031	0.979	0.972	0	Basal cells_AREG high	ENSCHIG00000000002
0	0.556332	0.742	0.416	0	Basal cells_AREG high	EZR
0	0.553346	0.416	0.145	0	Basal cells_AREG high	ST3GAL1
0	0.552618	0.402	0.09	0	Basal cells_AREG high	PROM2
0	0.54983	0.763	0.511	0	Basal cells_AREG high	UQCRQ
0	0.54983	0.39	0.116	0	Basal cells_AREG high	KCNK1
0	0.547564	0.489	0.133	0	Basal cells_AREG high	SDHA
0	0.543985	0.632	0.272	0	Basal cells_AREG high	ARL4A
0	0.535878	0.28	0.023	0	Basal cells_AREG high	MACC1
0	0.535102	0.572	0.221	0	Basal cells_AREG high	HINT2
0	0.5331	0.551	0.197	0	Basal cells_AREG high	SUCLG1
0	0.531163	0.508	0.163	0	Basal cells_AREG high	TUFM
0	0.529865	0.461	0.118	0	Basal cells_AREG high	PPARG
0	0.528312	0.537	0.167	0	Basal cells_AREG high	ETFA
0	0.527401	0.702	0.367	0	Basal cells_AREG high	ECH1
0	0.523748	0.526	0.169	0	Basal cells_AREG high	APRT
0	0.522448	0.466	0.116	0	Basal cells_AREG high	KRTCAP3
0	0.521117	0.737	0.391	0	Basal cells_AREG high	CAT
0	0.519974	0.283	0.095	0	Basal cells_AREG high	SAMD9
0	0.518711	0.698	0.289	0	Basal cells_AREG high	SGK1
0	0.516219	0.652	0.306	0	Basal cells_AREG high	HSDL2
0	0.510627	0.521	0.209	0	Basal cells_AREG high	COX8A
0	0.508807	0.544	0.179	0	Basal cells_AREG high	ALAD
0	0.507934	0.254	0.031	0	Basal cells_AREG high	TGM3
0	0.50615	0.676	0.325	0	Basal cells_AREG high	ATP1B1
0	0.505863	0.417	0.149	0	Basal cells_AREG high	PRRG4
0	0.505572	0.506	0.166	0	Basal cells_AREG high	THAP4
0	0.501921	0.263	0.064	0	Basal cells_AREG high	ITPKC
0	0.501249	0.454	0.131	0	Basal cells_AREG high	SLC12A7
0	0.499943	0.814	0.582	0	Basal cells_AREG high	ATP5F1B
0	0.495097	0.237	0.011	0	Basal cells_AREG high	ENSCHIG00000020284
0	0.494536	0.997	0.984	0	Basal cells_AREG high	RPLP2
0	0.492243	0.581	0.279	0	Basal cells_AREG high	ENSCHIG00000009256
0	0.482679	0.204	0.026	0	Basal cells_AREG high	ENSCHIG00000026788
0	0.482188	0.663	0.335	0	Basal cells_AREG high	CMC1
0	0.481865	0.371	0.036	0	Basal cells_AREG high	ATP5F1D
0	0.479197	0.563	0.202	0	Basal cells_AREG high	H2AFJ
0	0.474296	0.33	0.047	0	Basal cells_AREG high	ENSCHIG00000024345
0	0.474244	0.308	0.055	0	Basal cells_AREG high	MPZL3
0	0.466269	0.177	0.015	0	Basal cells_AREG high	LAMC2
0	0.463611	0.244	0.073	0	Basal cells_AREG high	TMCC3
0	0.463296	0.58	0.208	0	Basal cells_AREG high	TNNI3
0	0.459836	0.864	0.642	0	Basal cells_AREG high	NDUFB10
0	0.455996	0.392	0.127	0	Basal cells_AREG high	OSGIN1
0	0.453531	0.503	0.165	0	Basal cells_AREG high	GAMT
0	0.451074	0.951	0.885	0	Basal cells_AREG high	ENSCHIG00000010354
0	0.450877	0.386	0.089	0	Basal cells_AREG high	MLYCD
0	0.45054	0.46	0.146	0	Basal cells_AREG high	LDH-A
0	0.449878	0.345	0.125	0	Basal cells_AREG high	HBEGF
0	0.447624	0.998	0.989	0	Basal cells_AREG high	RPS18
0	0.443164	0.314	0.033	0	Basal cells_AREG high	MPST
0	0.440638	0.623	0.311	0	Basal cells_AREG high	NDUFB5
0	0.439491	0.822	0.481	0	Basal cells_AREG high	ENSCHIG00000010553
0	0.43593	0.621	0.283	0	Basal cells_AREG high	NAXE
0	0.433358	0.757	0.496	0	Basal cells_AREG high	ENSCHIG00000015681
0	0.432468	0.623	0.304	0	Basal cells_AREG high	ENSCHIG00000019373
0	0.432275	0.386	0.109	0	Basal cells_AREG high	PPIF
0	0.431299	0.427	0.129	0	Basal cells_AREG high	ENSCHIG00000009453
0	0.425757	0.573	0.222	0	Basal cells_AREG high	ENSCHIG00000025587
0	0.424525	0.348	0.067	0	Basal cells_AREG high	SERPINB5
0	0.421854	0.207	0.018	0	Basal cells_AREG high	ENSCHIG00000020337
0	0.418895	0.247	0.034	0	Basal cells_AREG high	ITGB4
0	0.417596	0.679	0.355	0	Basal cells_AREG high	AKR1A1
0	0.414902	0.51	0.217	0	Basal cells_AREG high	C21orf91
0	0.413616	0.578	0.278	0	Basal cells_AREG high	NDUFA10
0	0.413543	0.346	0.089	0	Basal cells_AREG high	CXADR
0	0.412059	0.294	0.056	0	Basal cells_AREG high	SLC26A2
0	0.410987	0.412	0.158	0	Basal cells_AREG high	ENSCHIG00000026293
0	0.407589	0.6	0.262	0	Basal cells_AREG high	CD109
0	0.406702	0.328	0.048	0	Basal cells_AREG high	MCEE
0	0.405858	0.414	0.111	0	Basal cells_AREG high	TSFM
0	0.401863	0.419	0.118	0	Basal cells_AREG high	SERTAD1
0	0.401723	0.375	0.089	0	Basal cells_AREG high	ENSCHIG00000001076
0	0.401154	0.614	0.307	0	Basal cells_AREG high	CCT3
0	0.400096	0.819	0.576	0	Basal cells_AREG high	OAZ1
0	0.39888	0.582	0.242	0	Basal cells_AREG high	DDR1
0	0.395879	0.732	0.447	0	Basal cells_AREG high	ENSCHIG00000013087
0	0.391416	0.281	0.081	0	Basal cells_AREG high	IRF7
0	0.389933	0.411	0.113	0	Basal cells_AREG high	SYTL1
0	0.389058	0.555	0.241	0	Basal cells_AREG high	PIGL
0	0.389045	0.317	0.045	0	Basal cells_AREG high	MRPL12
0	0.387497	0.528	0.262	0	Basal cells_AREG high	ENSCHIG00000023286
0	0.385637	0.296	0.095	0	Basal cells_AREG high	GPRC5A
0	0.38394	0.341	0.058	0	Basal cells_AREG high	ENSCHIG00000019809
0	0.380646	0.423	0.132	0	Basal cells_AREG high	ENO1
0	0.380423	0.253	0.039	0	Basal cells_AREG high	SLC22A18
0	0.380289	0.361	0.078	0	Basal cells_AREG high	EPHX1
0	0.378738	0.259	0.036	0	Basal cells_AREG high	PLA2R1
0	0.374441	0.502	0.193	0	Basal cells_AREG high	RPP21
0	0.374256	0.449	0.16	0	Basal cells_AREG high	PNKD
0	0.371751	0.452	0.164	0	Basal cells_AREG high	RBBP8
0	0.371379	0.522	0.222	0	Basal cells_AREG high	SULT1C4
0	0.370646	0.353	0.116	0	Basal cells_AREG high	BMP2
0	0.37063	0.295	0.07	0	Basal cells_AREG high	ENSCHIG00000012828
0	0.370172	0.268	0.075	0	Basal cells_AREG high	ENSCHIG00000023062
0	0.369363	0.999	0.991	0	Basal cells_AREG high	RPS5
0	0.368485	0.428	0.128	0	Basal cells_AREG high	PPP1R14C
0	0.367852	0.959	0.897	0	Basal cells_AREG high	ENSCHIG00000001441
0	0.365905	0.248	0.033	0	Basal cells_AREG high	SFN
0	0.364721	0.345	0.056	0	Basal cells_AREG high	ENSCHIG00000021234
0	0.361014	0.367	0.087	0	Basal cells_AREG high	ENSCHIG00000024075
0	0.360652	0.495	0.194	0	Basal cells_AREG high	IL1RAP
0	0.360207	0.448	0.17	0	Basal cells_AREG high	TTC38
0	0.357878	0.339	0.076	0	Basal cells_AREG high	RAB25
0	0.353075	0.417	0.136	0	Basal cells_AREG high	C1QBP
0	0.352929	0.408	0.148	0	Basal cells_AREG high	IQGAP2
0	0.352906	0.987	0.961	0	Basal cells_AREG high	ENSCHIG00000014599
0	0.352821	0.388	0.128	0	Basal cells_AREG high	SUOX
0	0.352788	0.281	0.04	0	Basal cells_AREG high	NT5E
0	0.351038	0.308	0.047	0	Basal cells_AREG high	ACADSB
0	0.350962	0.445	0.166	0	Basal cells_AREG high	MTHFD1
0	0.348723	0.453	0.172	0	Basal cells_AREG high	PKIA
0	0.344522	0.36	0.097	0	Basal cells_AREG high	GPI
0	0.343706	0.472	0.187	0	Basal cells_AREG high	ENSCHIG00000017301
0	0.343408	0.277	0.087	0	Basal cells_AREG high	KLF6
0	0.343249	0.315	0.092	0	Basal cells_AREG high	SPINT1
0	0.342695	0.408	0.146	0	Basal cells_AREG high	TMEM63B
0	0.34235	0.197	0.015	0	Basal cells_AREG high	CFAP57
0	0.340984	0.367	0.097	0	Basal cells_AREG high	ACAA1
0	0.339197	0.335	0.074	0	Basal cells_AREG high	CTSC
0	0.338354	0.193	0.058	0	Basal cells_AREG high	GJA1
0	0.33734	0.257	0.043	0	Basal cells_AREG high	GNMT
0	0.336779	0.487	0.207	0	Basal cells_AREG high	MUT
0	0.33315	0.995	0.982	0	Basal cells_AREG high	ENSCHIG00000023017
0	0.333081	0.339	0.079	0	Basal cells_AREG high	ENSCHIG00000019709
0	0.332738	0.292	0.051	0	Basal cells_AREG high	ENSCHIG00000010903
0	0.330434	0.221	0.031	0	Basal cells_AREG high	LIX1
0	0.327079	0.591	0.298	0	Basal cells_AREG high	TXNDC17
0	0.325992	0.437	0.162	0	Basal cells_AREG high	MRPL2
0	0.32374	1	0.994	0	Basal cells_AREG high	ENSCHIG00000022194
0	0.317559	0.635	0.351	0	Basal cells_AREG high	NDUFA9
0	0.31724	0.277	0.054	0	Basal cells_AREG high	CWH43
0	0.315553	0.351	0.083	0	Basal cells_AREG high	MGMT
0	0.31547	0.555	0.265	0	Basal cells_AREG high	DST
0	0.314756	0.539	0.249	0	Basal cells_AREG high	NDUFAF3
0	0.313568	0.281	0.079	0	Basal cells_AREG high	DSG3
0	0.312093	0.361	0.105	0	Basal cells_AREG high	RETSAT
0	0.311211	0.348	0.121	0	Basal cells_AREG high	CELSR2
0	0.311035	0.474	0.18	0	Basal cells_AREG high	MACROD1
0	0.309719	0.643	0.35	0	Basal cells_AREG high	TKT
0	0.309647	0.196	0.042	0	Basal cells_AREG high	PRAG1
0	0.307491	0.388	0.125	0	Basal cells_AREG high	PPID
0	0.30593	0.247	0.045	0	Basal cells_AREG high	PPARGC1B
0	0.304016	0.446	0.191	0	Basal cells_AREG high	OGDH
0	0.303543	0.407	0.163	0	Basal cells_AREG high	FERMT1
0	0.30348	0.181	0.034	0	Basal cells_AREG high	HSPA4L
0	0.302189	0.566	0.275	0	Basal cells_AREG high	SNRNP25
0	0.301283	0.285	0.077	0	Basal cells_AREG high	SH3RF2
0	0.301113	0.346	0.116	0	Basal cells_AREG high	TWF1
0	0.299785	0.459	0.188	0	Basal cells_AREG high	DCXR
0	0.298121	0.128	0.003	0	Basal cells_AREG high	ENSCHIG00000010368
0	0.298061	0.442	0.202	0	Basal cells_AREG high	RFC4
0	0.29652	1	0.992	0	Basal cells_AREG high	RPL8
0	0.29478	0.293	0.064	0	Basal cells_AREG high	MRPL38
0	0.293809	0.342	0.097	0	Basal cells_AREG high	ITGA6
0	0.293158	0.24	0.064	0	Basal cells_AREG high	LAMA3
0	0.291922	0.501	0.233	0	Basal cells_AREG high	UCHL3
0	0.291809	0.479	0.211	0	Basal cells_AREG high	ACO1
0	0.28877	0.46	0.183	0	Basal cells_AREG high	SPINT2
0	0.288278	0.128	0.013	0	Basal cells_AREG high	HSPA1L
0	0.288223	0.207	0.009	0	Basal cells_AREG high	ENSCHIG00000020562
0	0.287377	0.392	0.13	0	Basal cells_AREG high	REXO2
0	0.287133	0.563	0.285	0	Basal cells_AREG high	ENSCHIG00000005280
0	0.287111	0.394	0.139	0	Basal cells_AREG high	LACTB2
0	0.286102	0.117	0.012	0	Basal cells_AREG high	ENSCHIG00000025429
0	0.286061	0.589	0.303	0	Basal cells_AREG high	FH
0	0.285884	0.449	0.189	0	Basal cells_AREG high	MRPL16
0	0.285602	0.326	0.104	0	Basal cells_AREG high	LSR
0	0.283626	0.245	0.031	0	Basal cells_AREG high	PCCA
0	0.283151	0.256	0.056	0	Basal cells_AREG high	GPNMB
0	0.282916	0.559	0.246	0	Basal cells_AREG high	ECHDC1
0	0.28276	0.477	0.224	0	Basal cells_AREG high	ANAPC2
0	0.282618	0.447	0.196	0	Basal cells_AREG high	NMRAL1
0	0.281363	0.147	0.024	0	Basal cells_AREG high	ELF3
0	0.280931	0.161	0.026	0	Basal cells_AREG high	TMEM171
0	0.280907	0.483	0.198	0	Basal cells_AREG high	IRX3
0	0.279236	0.452	0.188	0	Basal cells_AREG high	CSAD
0	0.276755	0.401	0.137	0	Basal cells_AREG high	DDTL
0	0.275624	0.213	0.051	0	Basal cells_AREG high	LMO7
0	0.271563	0.395	0.144	0	Basal cells_AREG high	PMPCB
0	0.271026	0.321	0.099	0	Basal cells_AREG high	IL20RB
0	0.270508	0.314	0.112	0	Basal cells_AREG high	SERPINB8
0	0.269749	0.156	0.04	0	Basal cells_AREG high	DENND2C
0	0.269635	0.23	0.026	0	Basal cells_AREG high	MRPS34
0	0.269305	0.312	0.105	0	Basal cells_AREG high	THEM5
0	0.269225	0.286	0.073	0	Basal cells_AREG high	C9orf16
0	0.268423	0.264	0.087	0	Basal cells_AREG high	ABHD6
0	0.267611	0.336	0.113	0	Basal cells_AREG high	ACADVL
0	0.266756	0.206	0.044	0	Basal cells_AREG high	AHSG
0	0.265785	0.334	0.099	0	Basal cells_AREG high	ENSCHIG00000024054
0	0.263654	0.333	0.113	0	Basal cells_AREG high	PTPN13
0	0.263194	0.392	0.119	0	Basal cells_AREG high	ENSCHIG00000015669
0	0.262115	0.207	0.042	0	Basal cells_AREG high	DSC3
[truncated: 18,347 more rows]

## Sheet: Table S9
Table S9. Gene ontology (GO) terms of the genes exprssed in different cell types in the rumen tissues of sheep.
[truncated: 9,362 more rows]

[truncated: 42 more sheets: Table S10, Table S11, Table S12, Table S13, Table S14, Table S15, Table S16, Table S17, Table S18, Table S19, Table S20, Table S21, Table S22, Table S23, Table S24, Table S25, Table S26, Table S27, Table S28, Table S29 …]
